# Supplementary material for: Radioisotopes demonstrate changes in global atmospheric circulation possibly caused by global warming
Source: PubMed Central journal article supplement (PMC7329870; doi:10.1038/s41598-020-66541-5), 2020-07-01

# **Title: Radioisotopes demonstrate changes in global atmospheric circulation possibly caused by global warming**

**Authors:** Lucrezia Terzi<sup>a,b\*</sup>, Gerhard Wotawa<sup>c</sup>, Michael Schoeppner<sup>d,e</sup>, Martin Kalinowski<sup>d</sup>, Paul R.J. Saey<sup>b</sup>, Philipp Steinmann<sup>f</sup>, Lan Luan<sup>g</sup> and Paul W. Staten<sup>g</sup>.

**Affiliations:** <sup>a</sup>Belgian Nuclear Research Centre (SCK•CEN), Mol, Belgium; <sup>b</sup>Technische Universität Wien, Atominstitut, Austria; <sup>c</sup>Zentralanstalt für Meteorologie und Geodynamik (ZAMG), Vienna, Austria, <sup>d</sup>Provisional Technical Secretariat, Preparatory Commission for the Nuclear-Test-Ban Treaty Organization, International Data Centre, Vienna, Austria; <sup>e</sup>Institute of Safety/Security and Risk Sciences, Vienna, Austria; <sup>f</sup>Federal Office of Public Health (BAG), Bern, Switzerland; <sup>g</sup>Indiana University Bloomington, Bloomington, Indiana, USA.

## **\*Corresponding Author:**

Lucrezia Terzi

Ph: +43 6644553833

e-mail: [lucrezia.terzi@sckcen.be](mailto:lucrezia.terzi@sckcen.be)

<sup>a</sup> SCK•CEN, Belgium Nuclear Research Centre,  
Boeretang 200, 2400 Mol, Belgium.

<sup>b</sup> Technische Universität Wien, Atominstitut,  
Stadionallee 2, 1020 Wien, Austria.

# RN01

$^7\text{Be}$  data versus cosmic rays

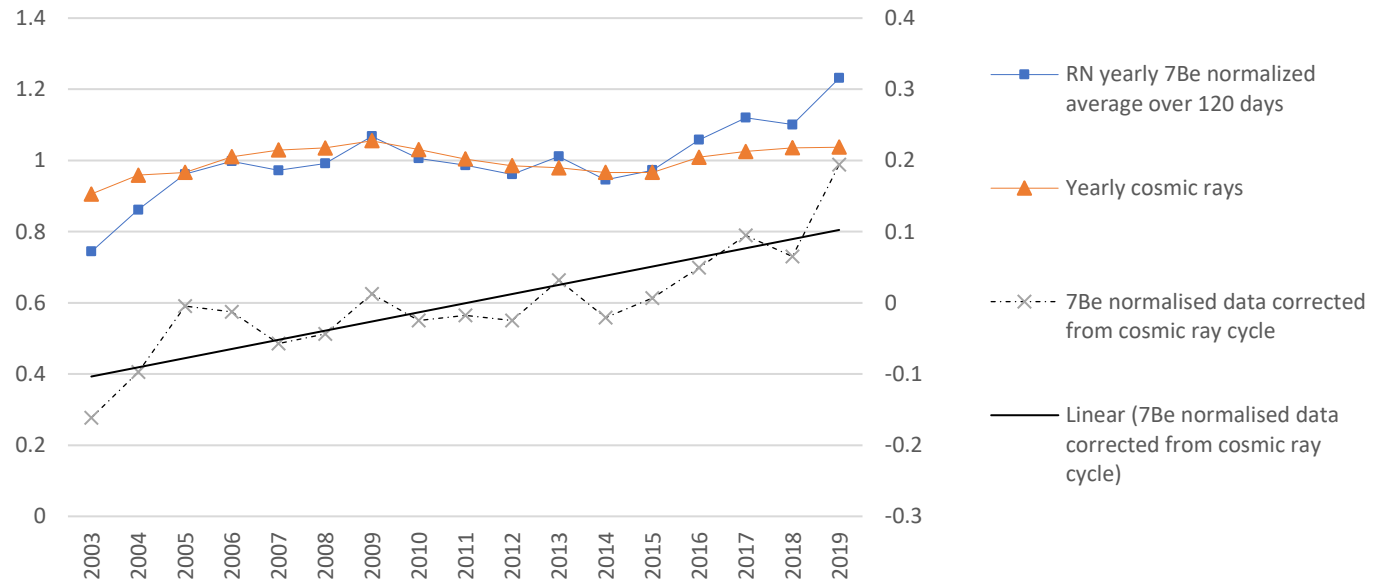

RN monthly  $^7\text{Be}$  normalized average over 120 days

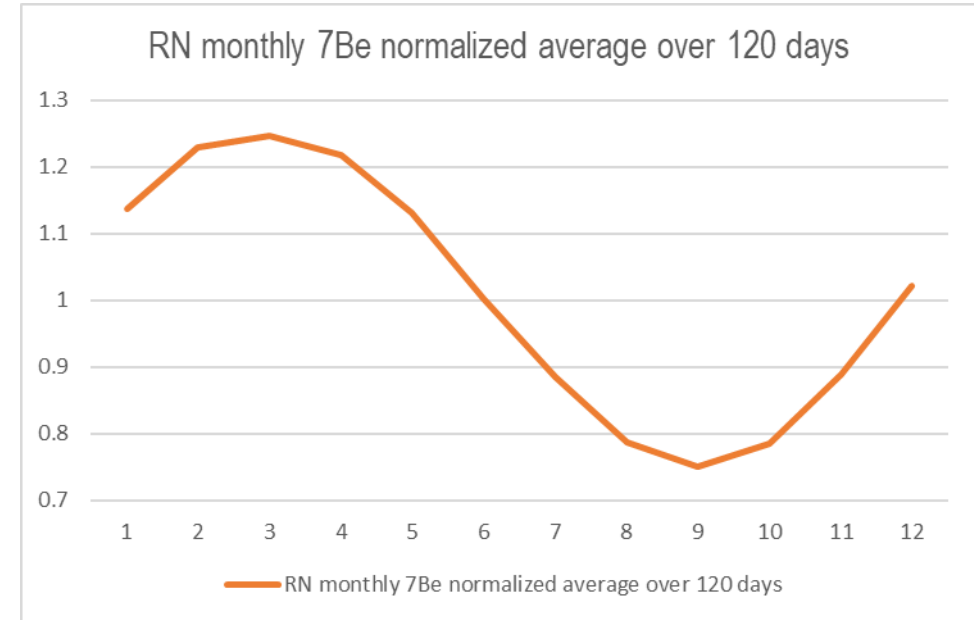

# RN03

### $^7\text{Be}$ data versus cosmic rays

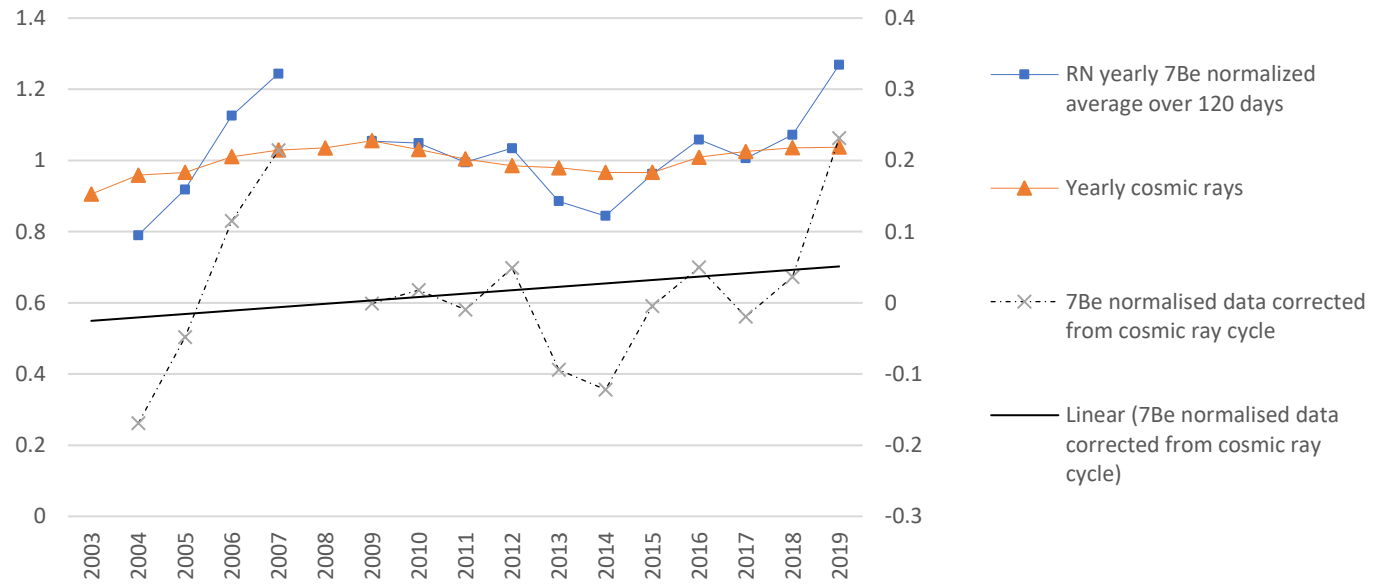

### RN monthly $^7\text{Be}$ normalized average over 120 days

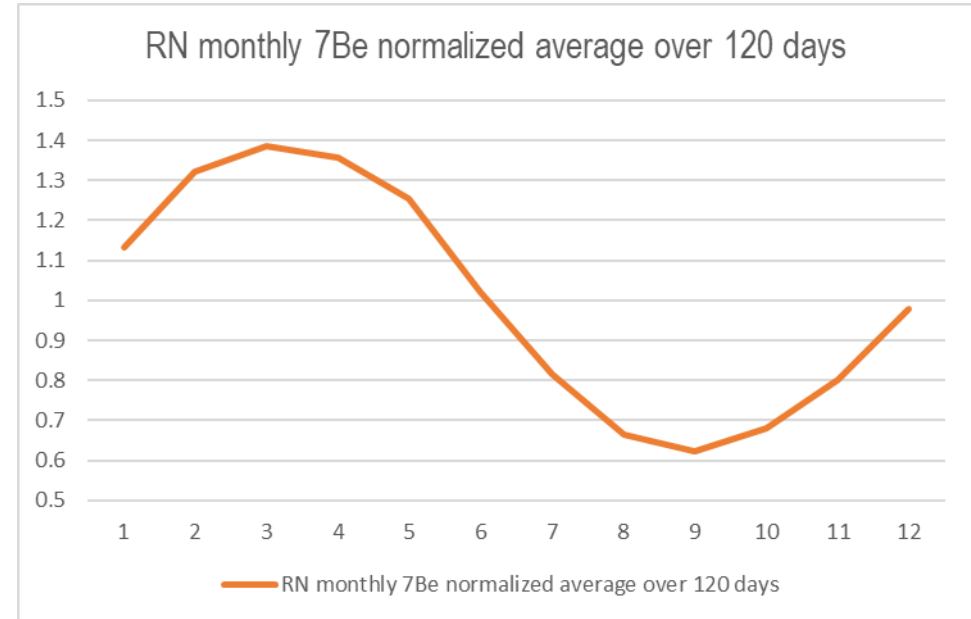

# RN04

### <sup>7</sup>Be data versus cosmic rays

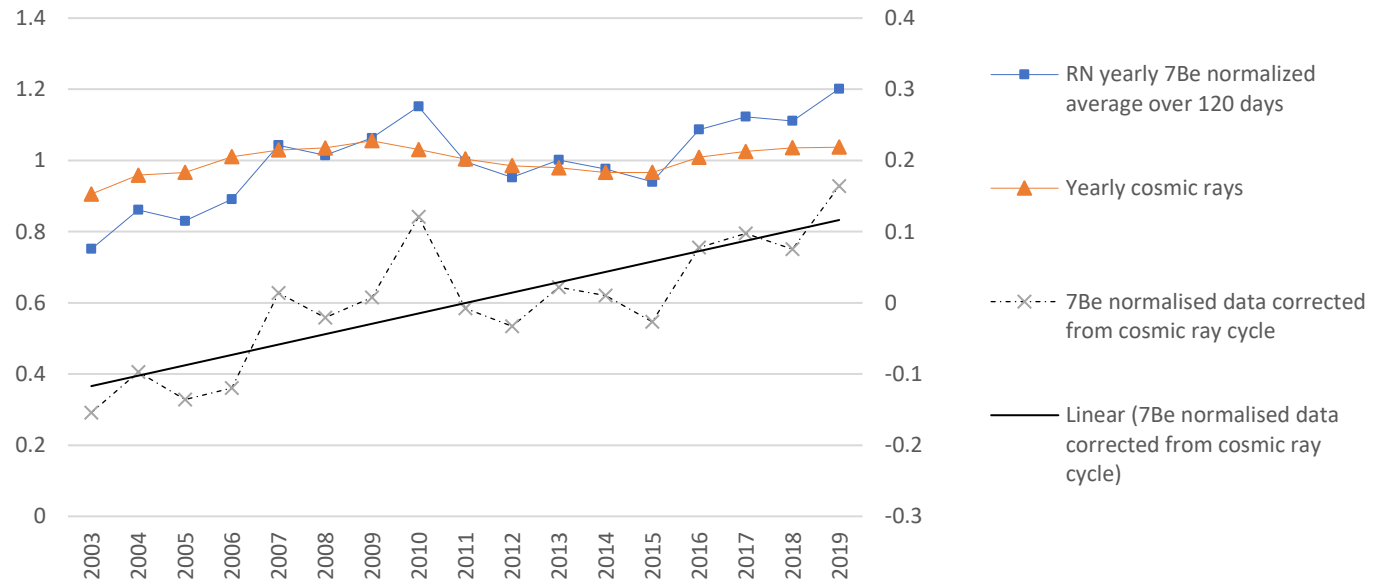

### RN monthly <sup>7</sup>Be normalized average over 120 days

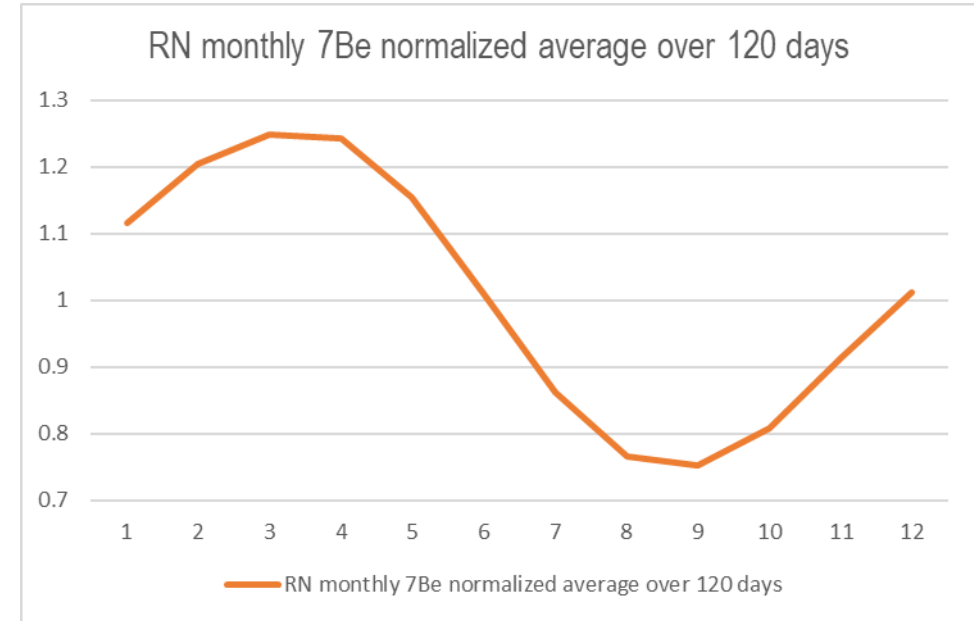

# RN05

$^7\text{Be}$  data versus cosmic rays

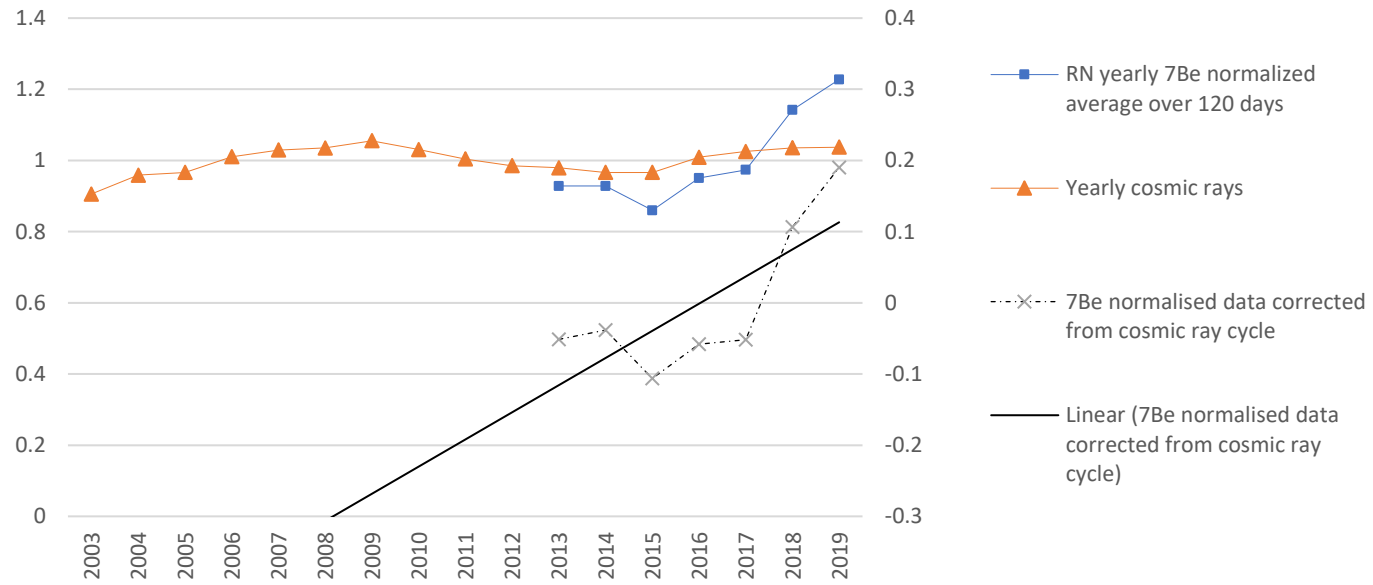

RN monthly  $^7\text{Be}$  normalized average over 120 days

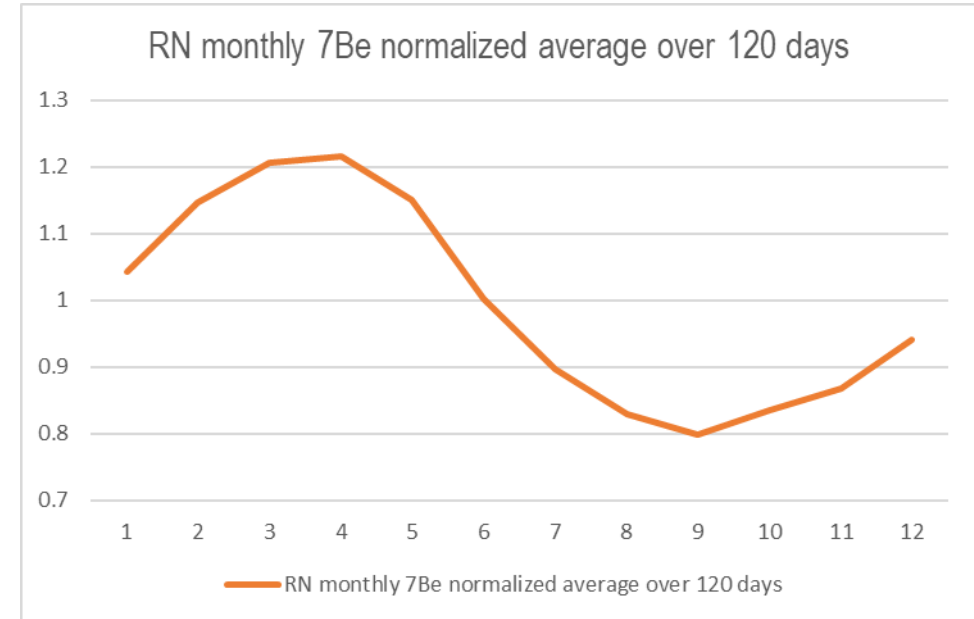

# RN06

$^7\text{Be}$  data versus cosmic rays

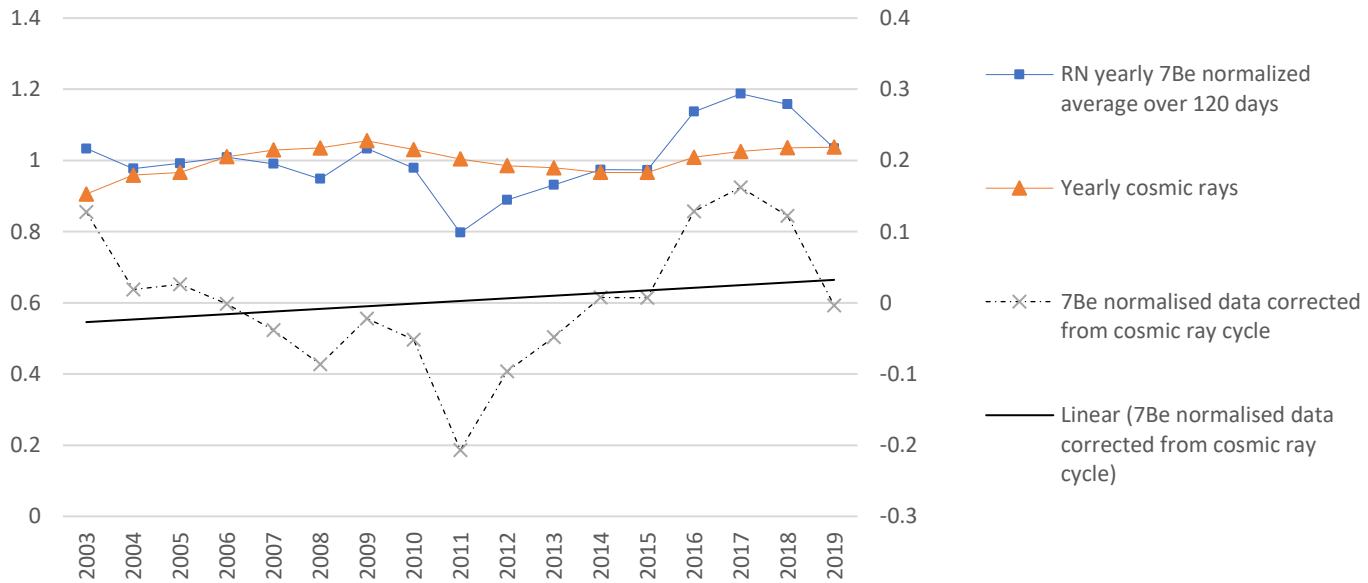

RN monthly  $^7\text{Be}$  normalized average over 120 days

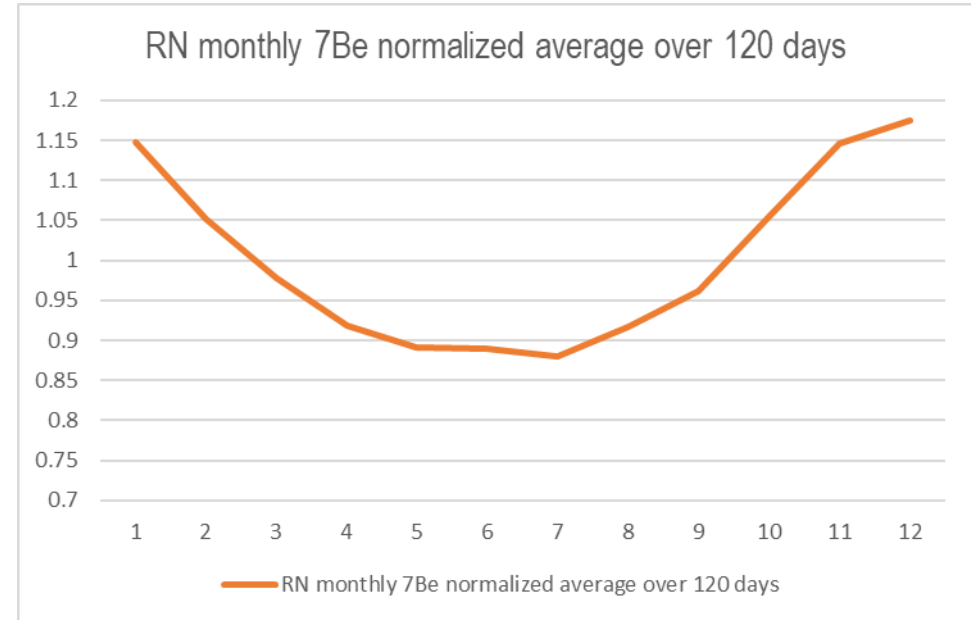

# RN07

<sup>7</sup>Be data versus cosmic rays

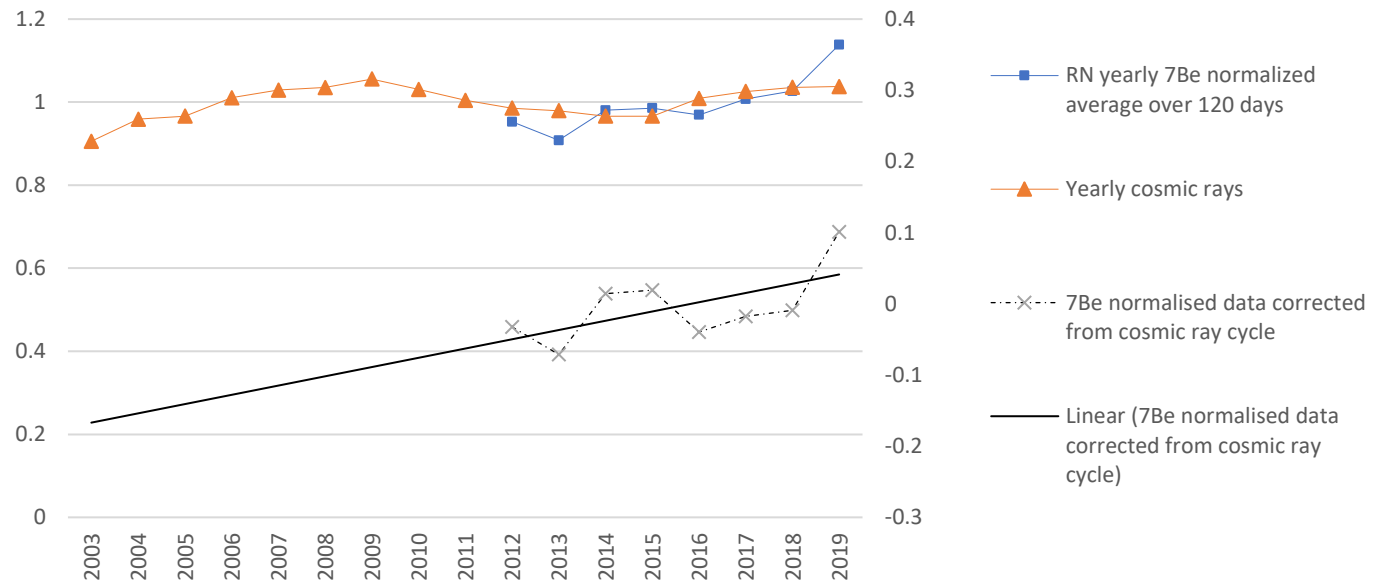

RN monthly <sup>7</sup>Be normalized average over 120 days

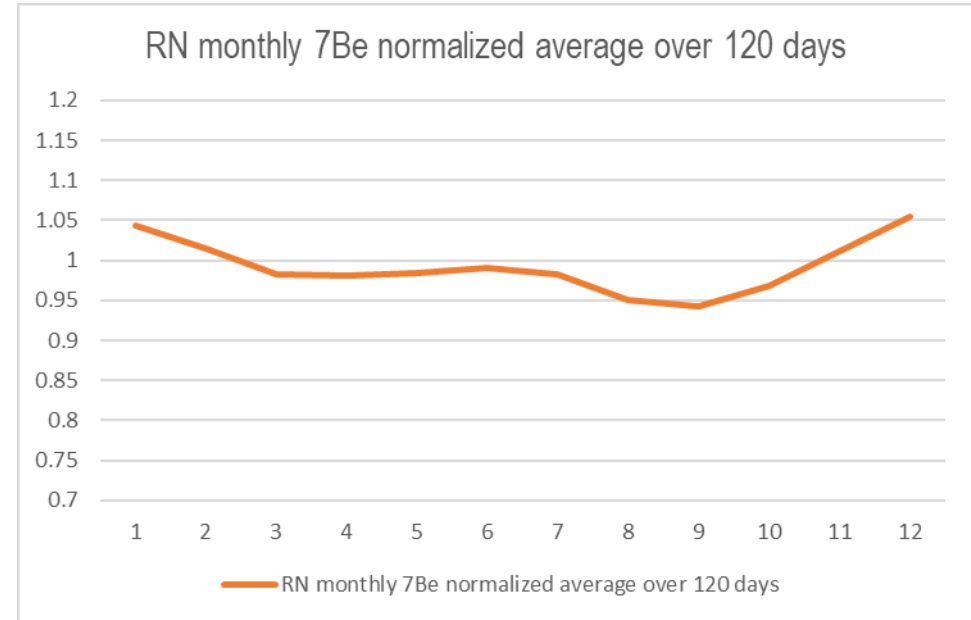

# RN08

$^7\text{Be}$  data versus cosmic rays

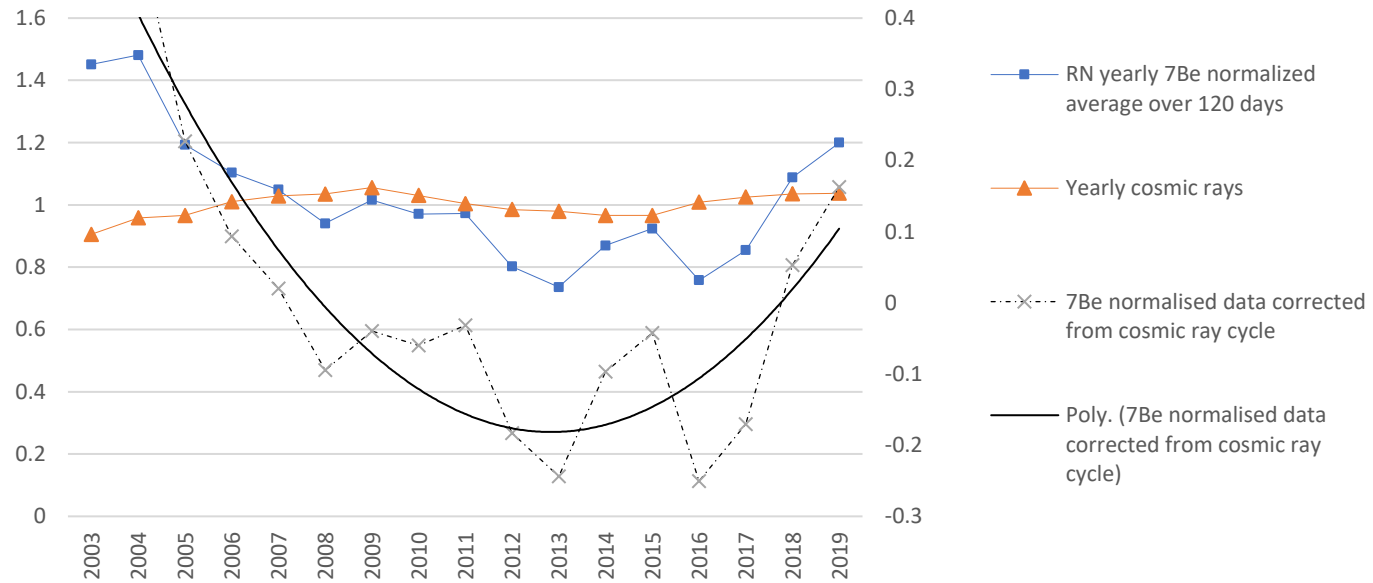

RN monthly  $^7\text{Be}$  normalized average over 120 days

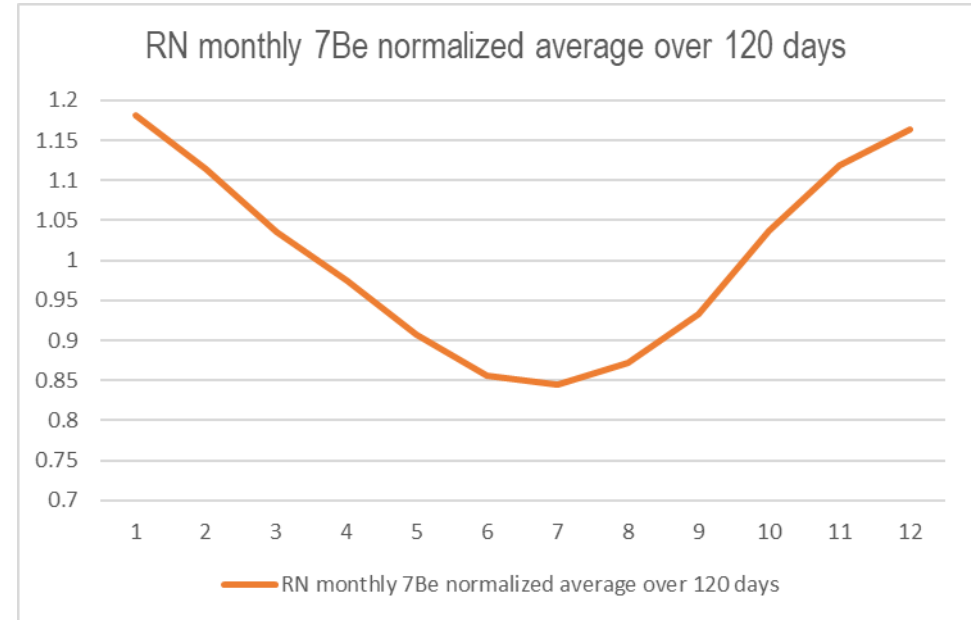



# RN09

$^7\text{Be}$  data versus cosmic rays

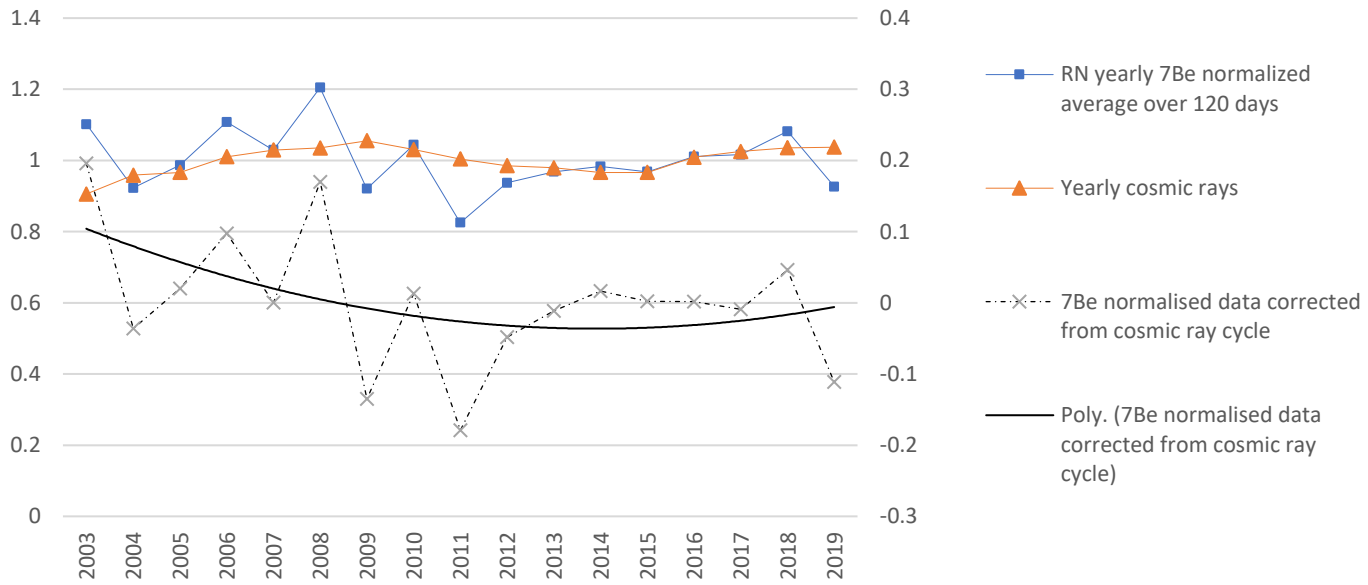

RN monthly  $^7\text{Be}$  normalized average over 120 days

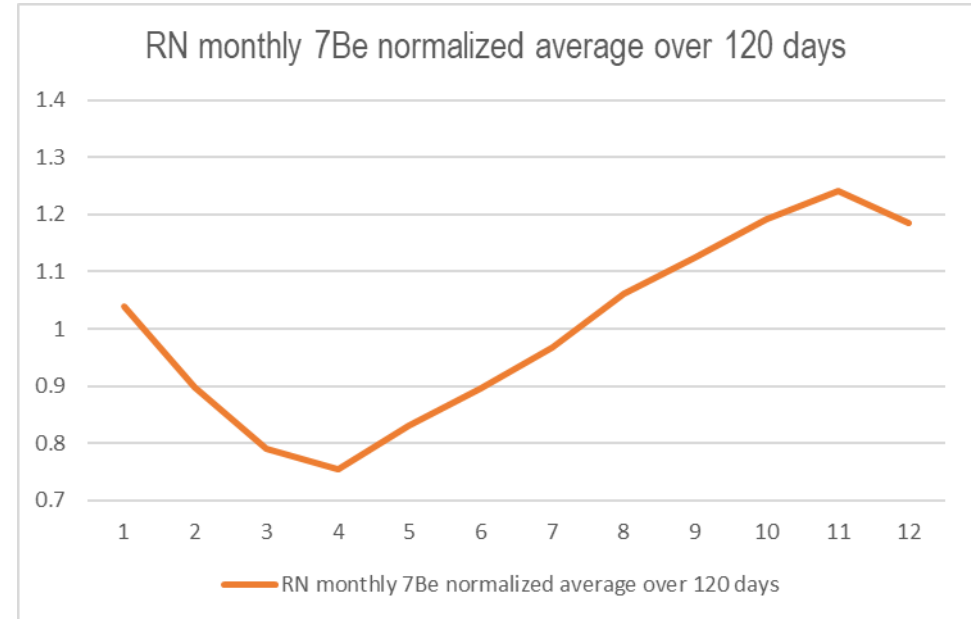

# RN10

### $^7\text{Be}$ data versus cosmic rays

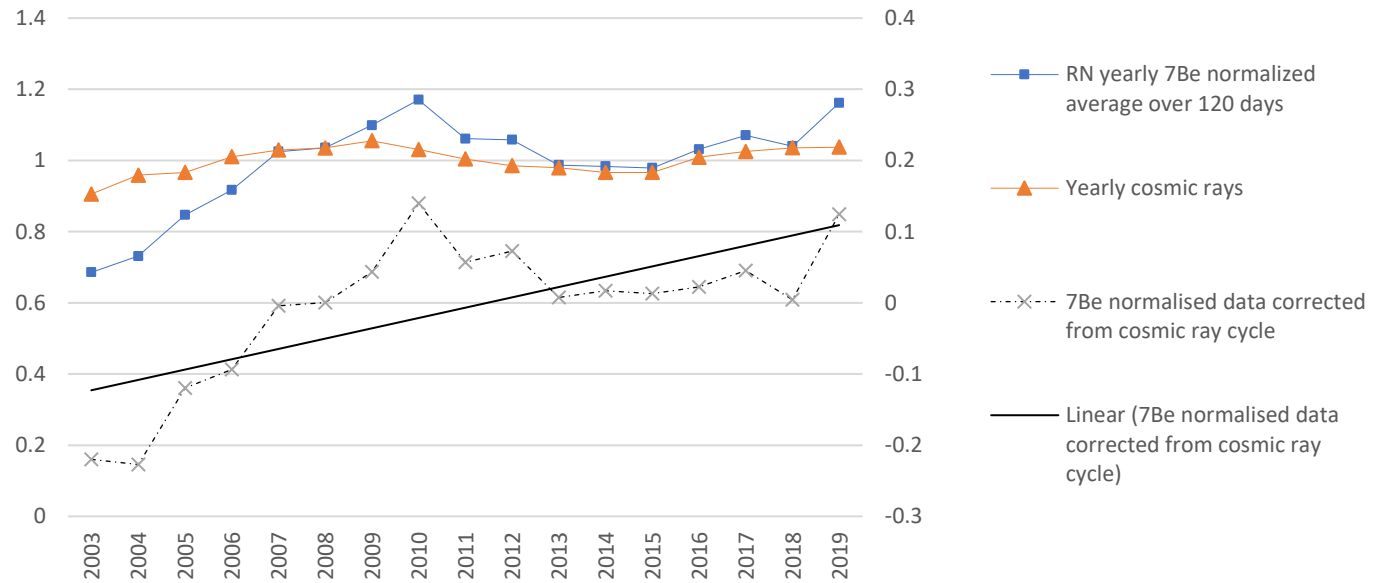

### RN monthly $^7\text{Be}$ normalized average over 120 days

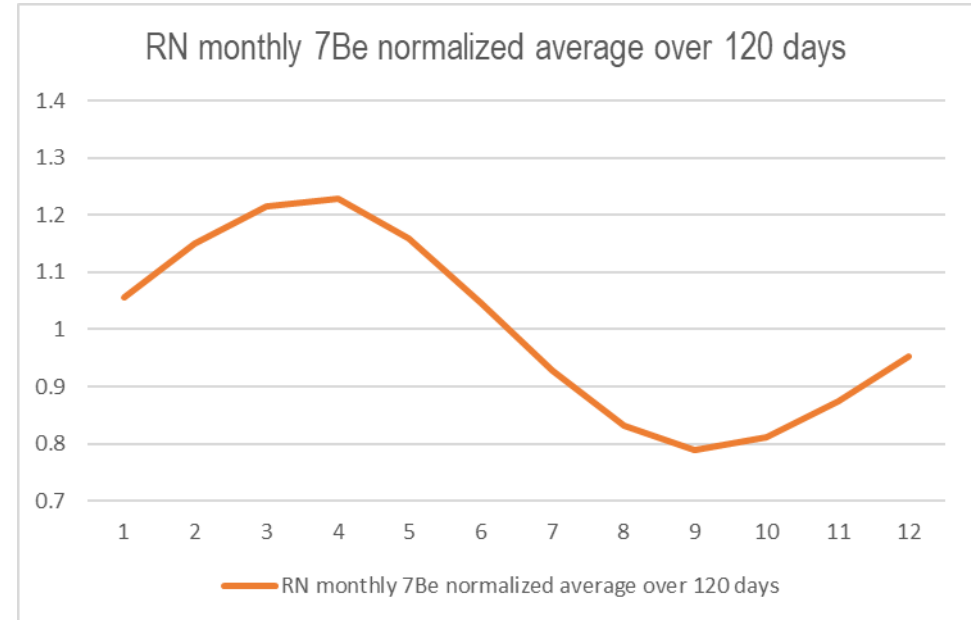

# RN11

<sup>7</sup>Be data versus cosmic rays

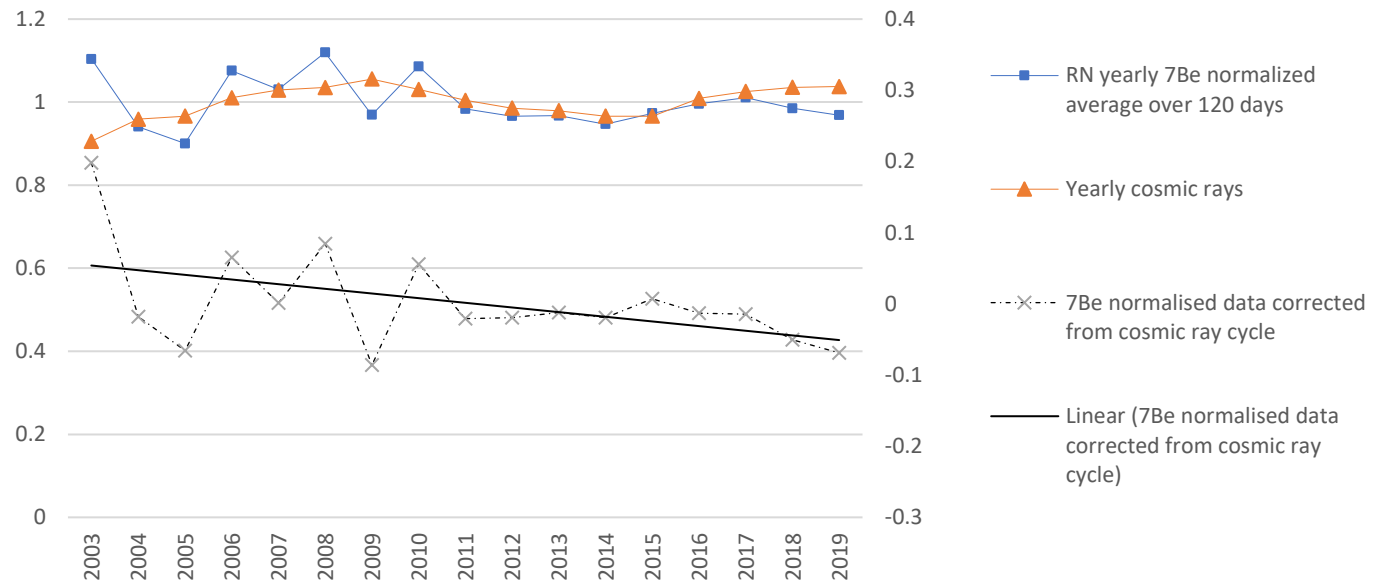

RN monthly 7Be normalized average over 120 days

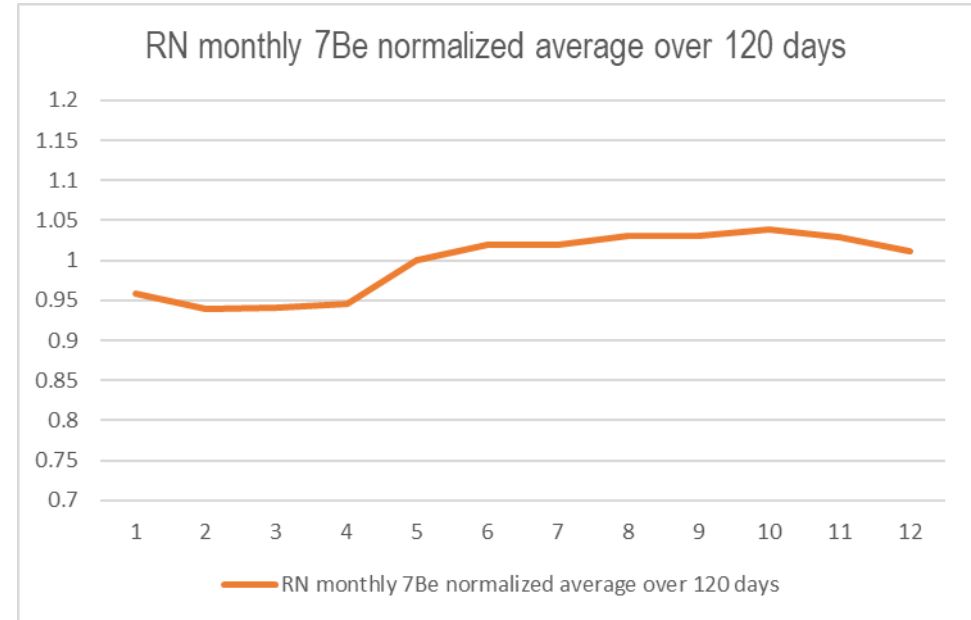

# RN13

$^7\text{Be}$  data versus cosmic rays

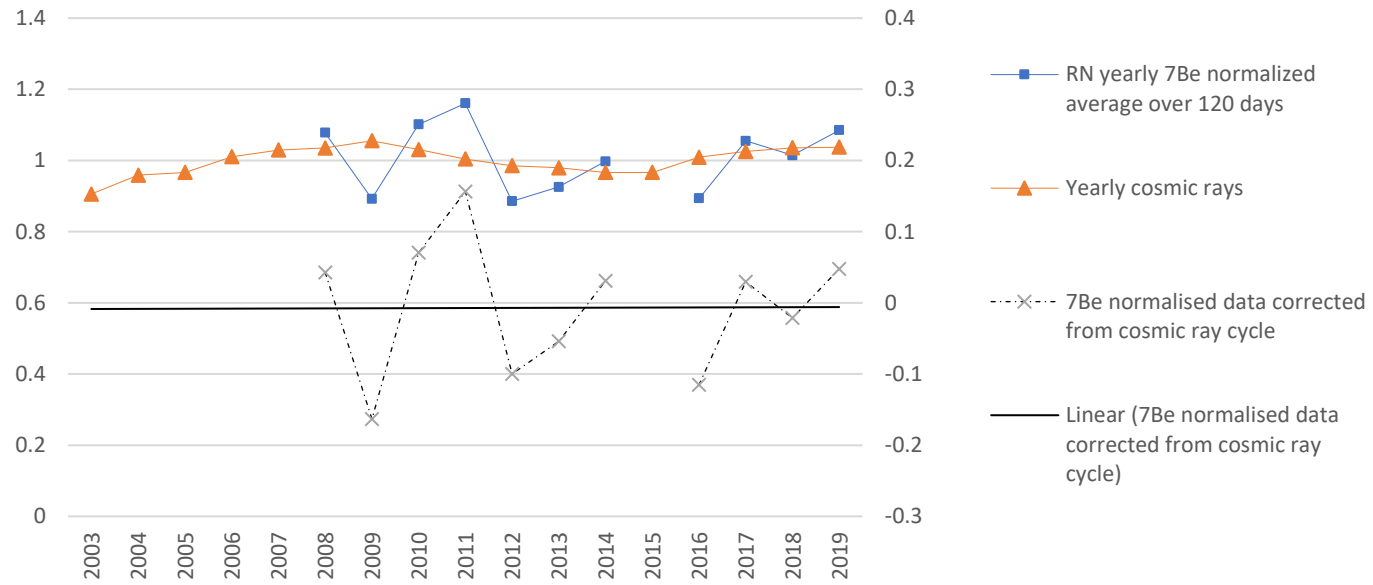

RN monthly  $^7\text{Be}$  normalized average over 120 days

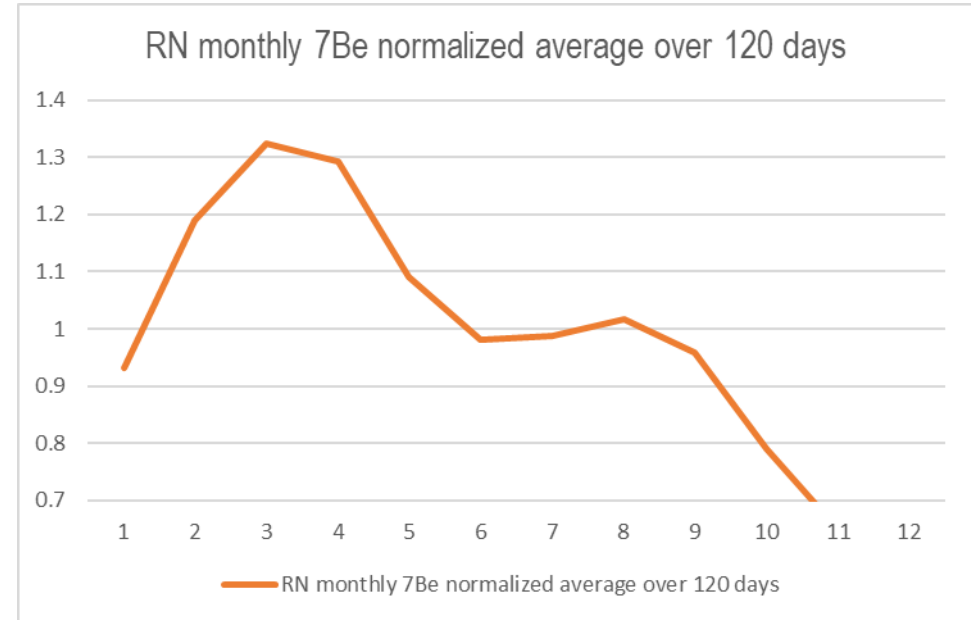

# RN14

$^7\text{Be}$  data versus cosmic rays

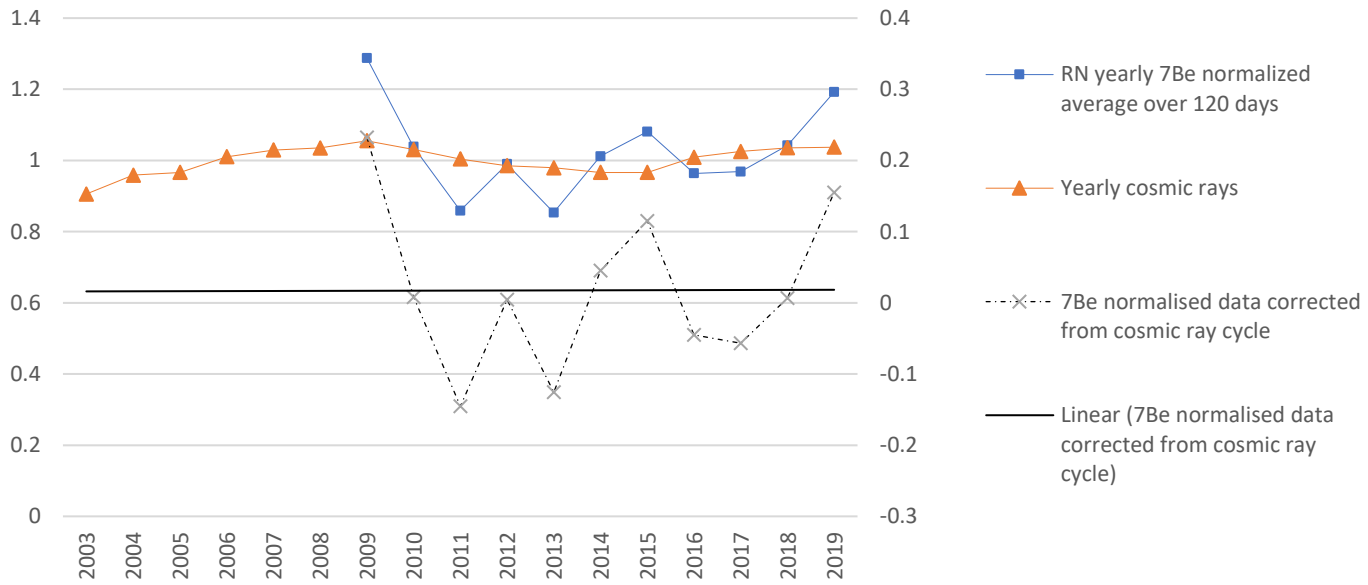

RN monthly  $^7\text{Be}$  normalized average over 120 days

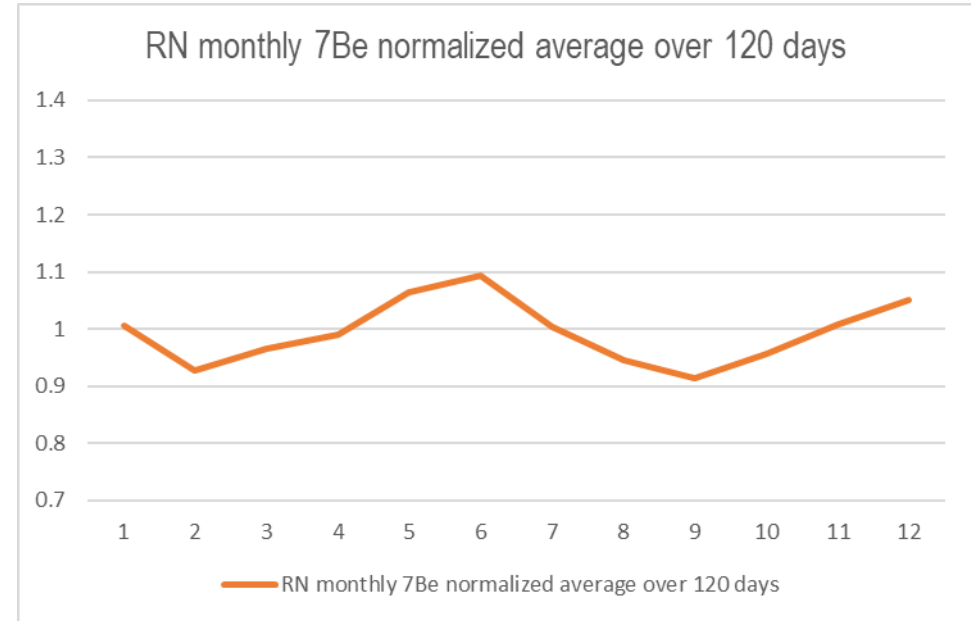

# RN15

$^7\text{Be}$  data versus cosmic rays

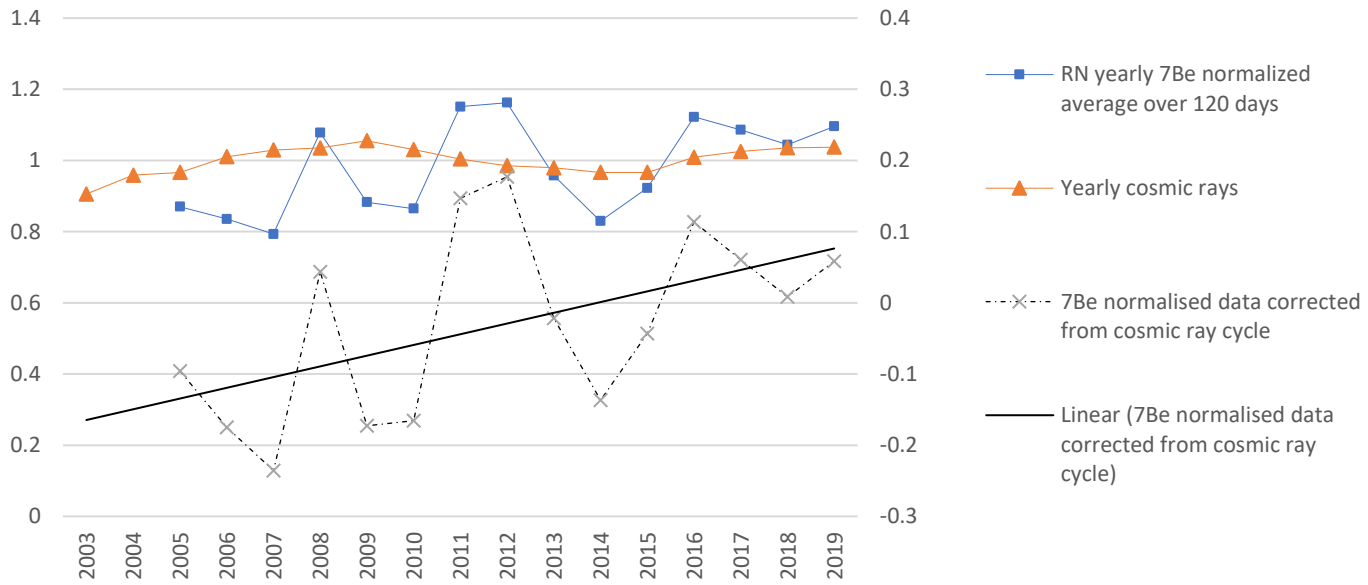

RN monthly  $^7\text{Be}$  normalized average over 120 days

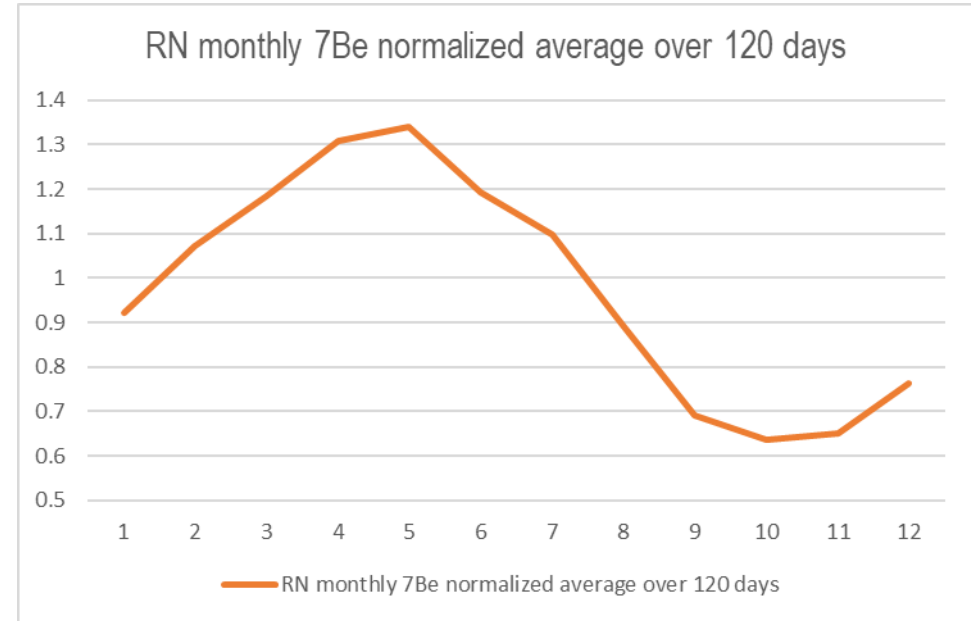

# RN16

<sup>7</sup>Be data versus cosmic rays

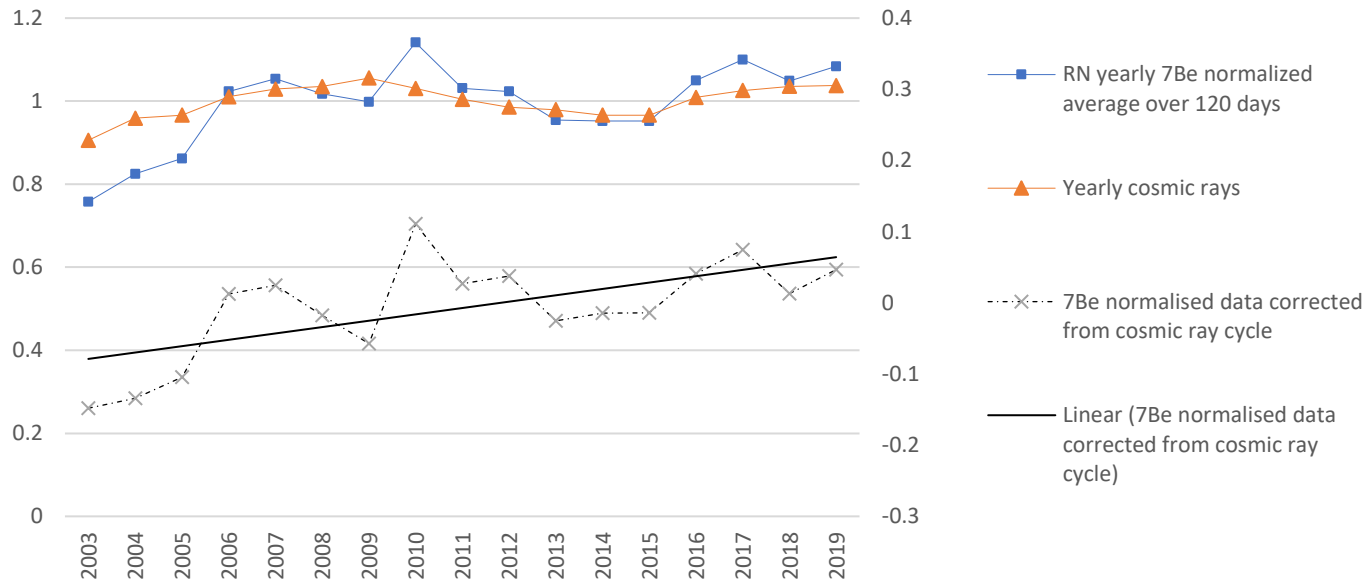

RN monthly <sup>7</sup>Be normalized average over 120 days

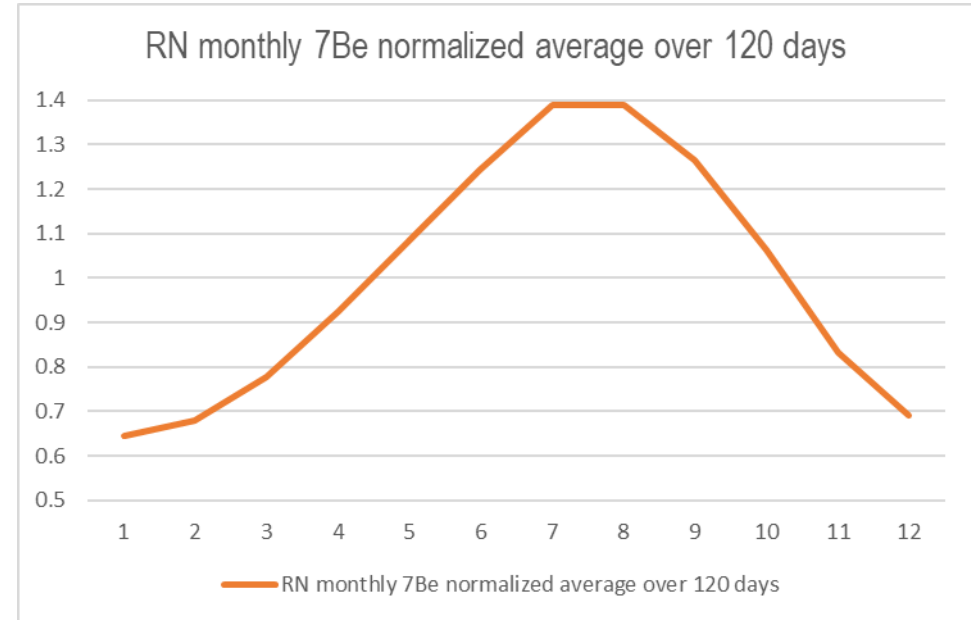

# RN17

$^7\text{Be}$  data versus cosmic rays

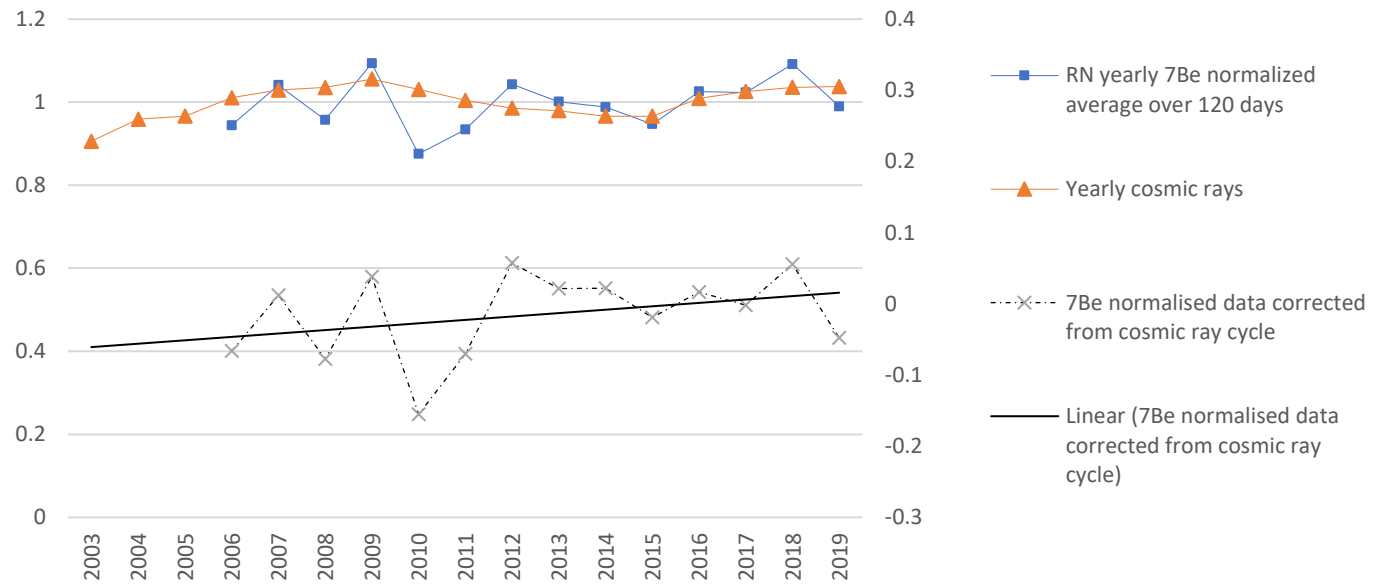

RN monthly  $^7\text{Be}$  normalized average over 120 days

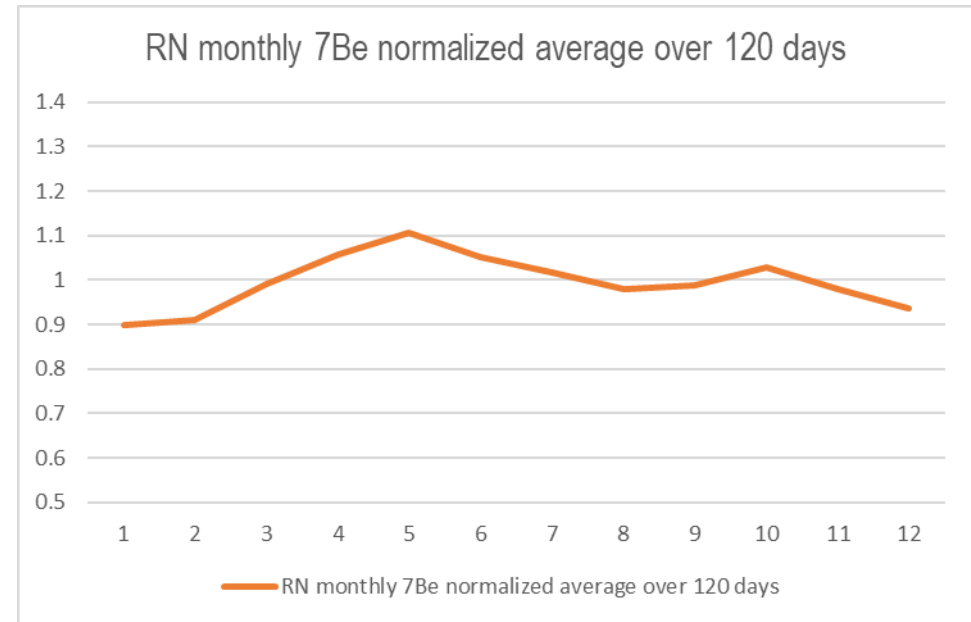



# RN18

$^7\text{Be}$  data versus cosmic rays

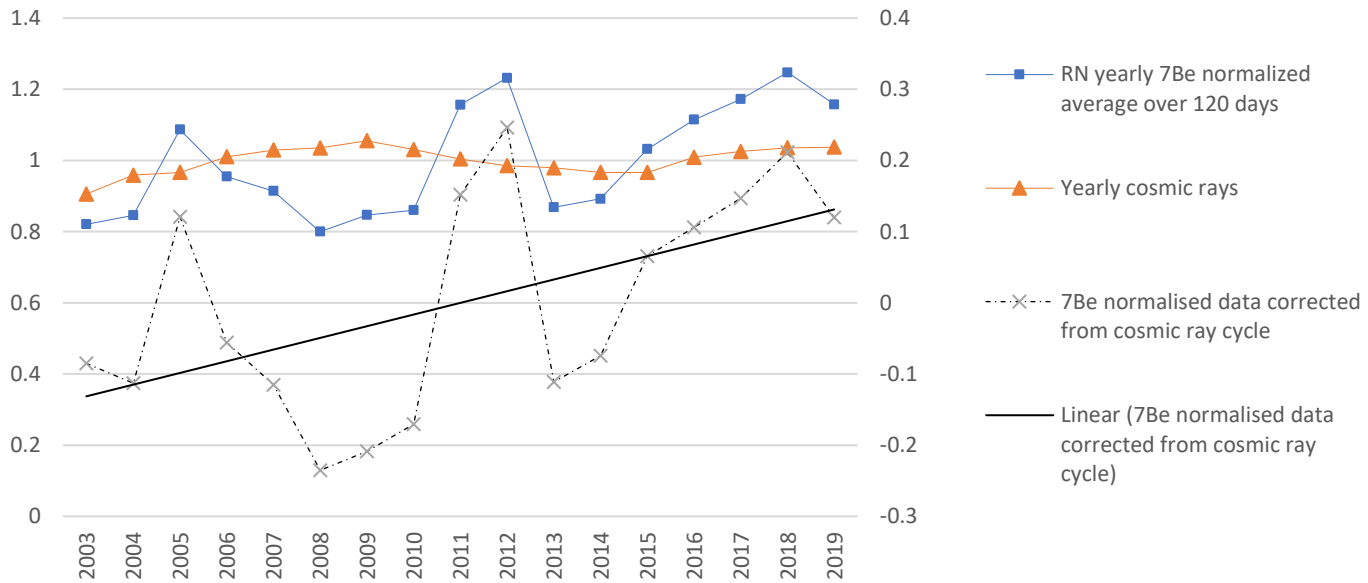

RN monthly  $^7\text{Be}$  normalized average over 120 days

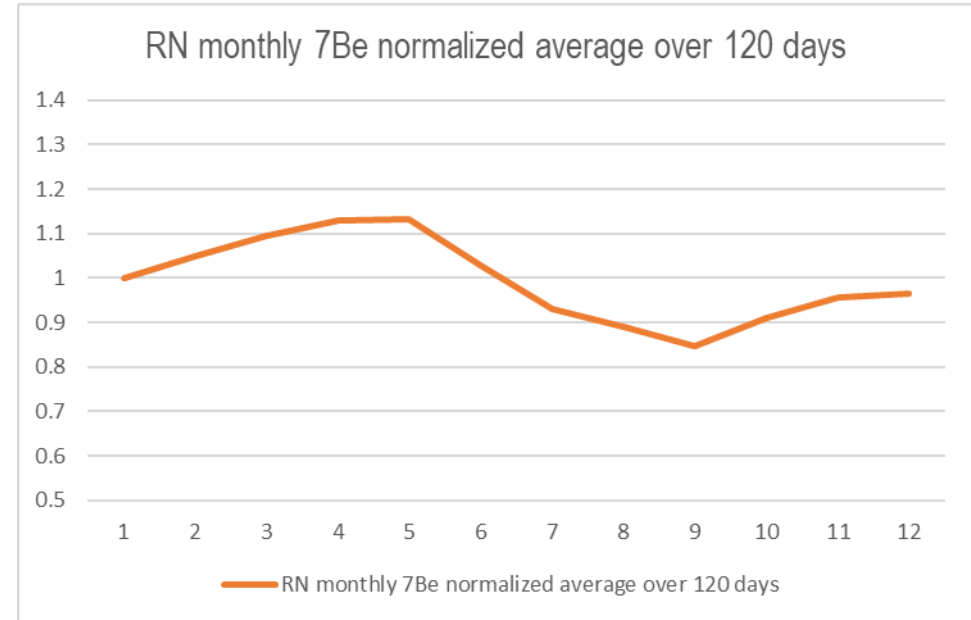

# RN19

### $^7\text{Be}$ data versus cosmic rays

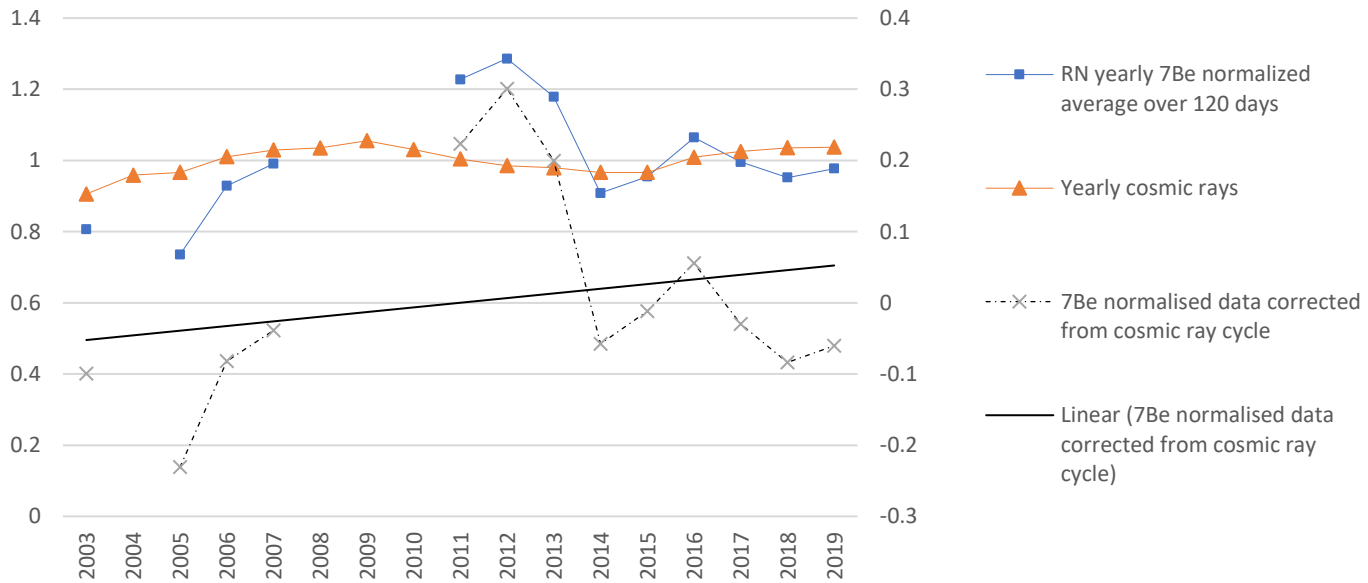

### RN monthly $^7\text{Be}$ normalized average over 120 days

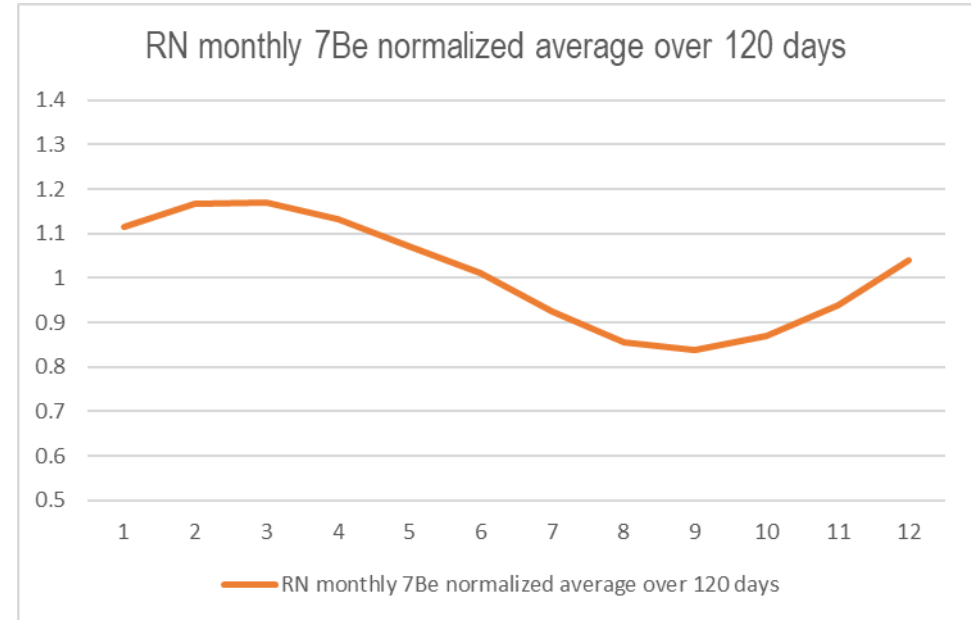

# RN23

$^7\text{Be}$  data versus cosmic rays

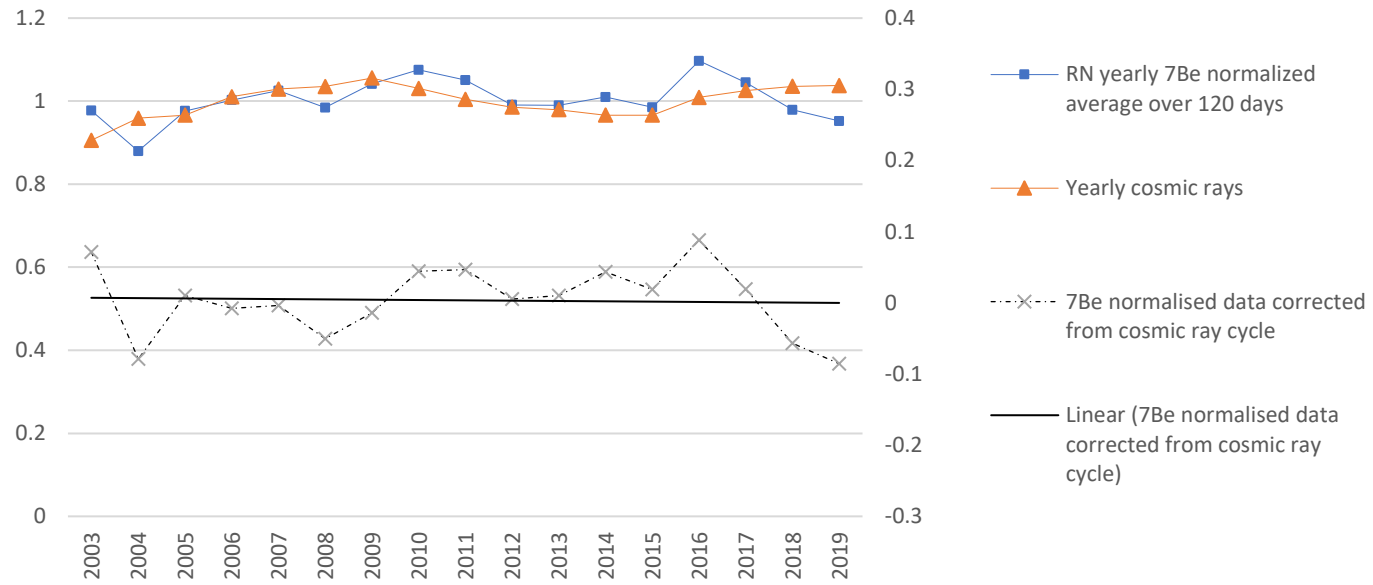

RN monthly  $^7\text{Be}$  normalized average over 120 days

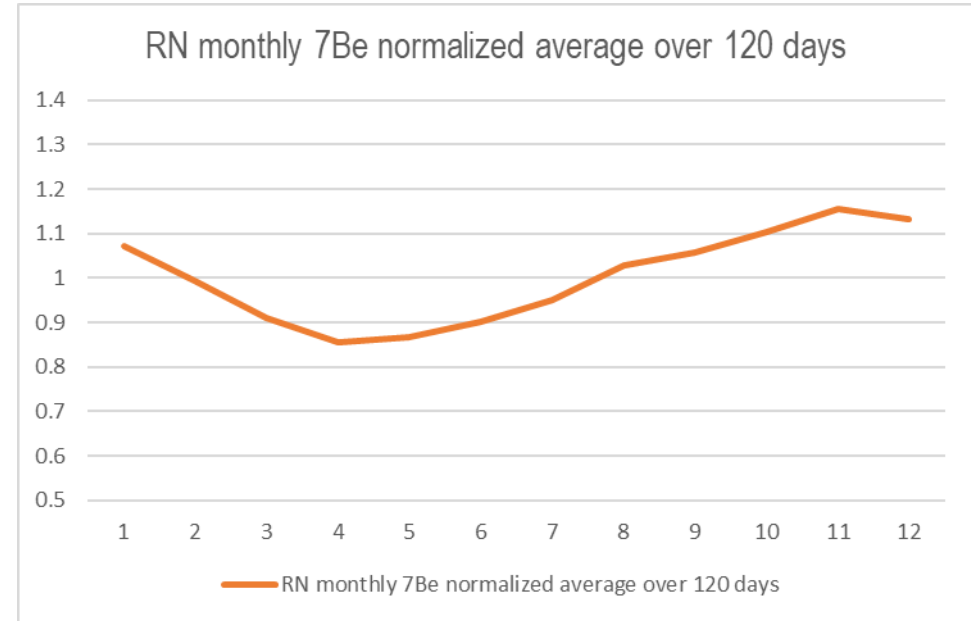

# RN26

### $^7\text{Be}$ data versus cosmic rays

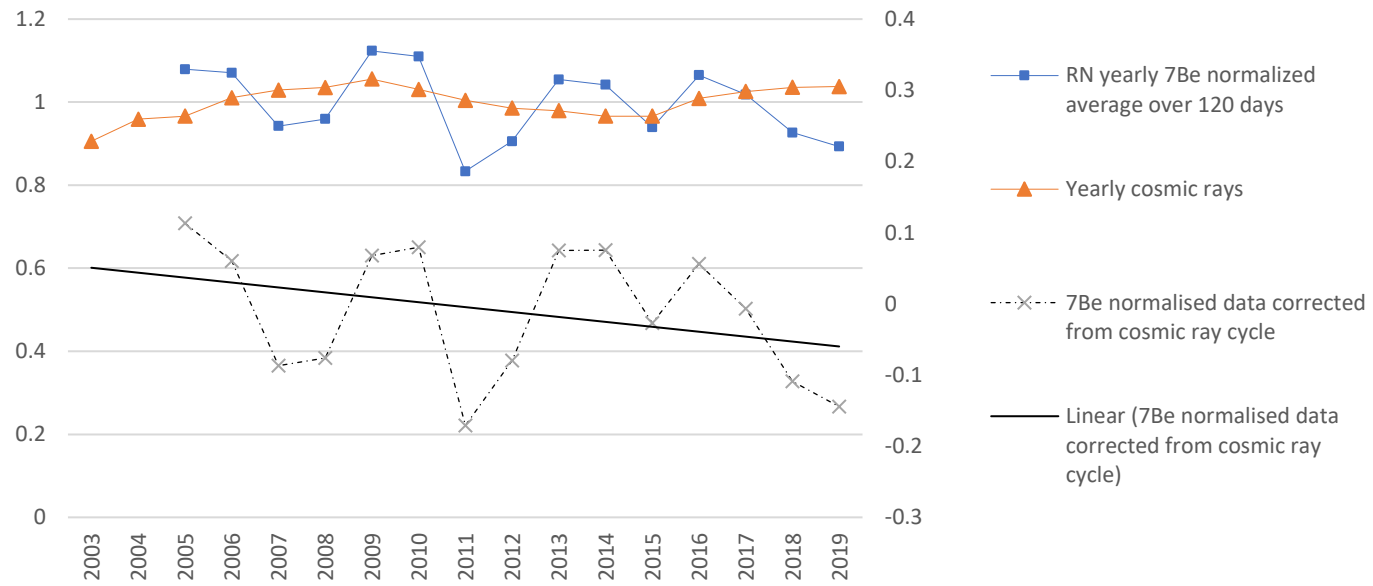

### RN monthly $^7\text{Be}$ normalized average over 120 days

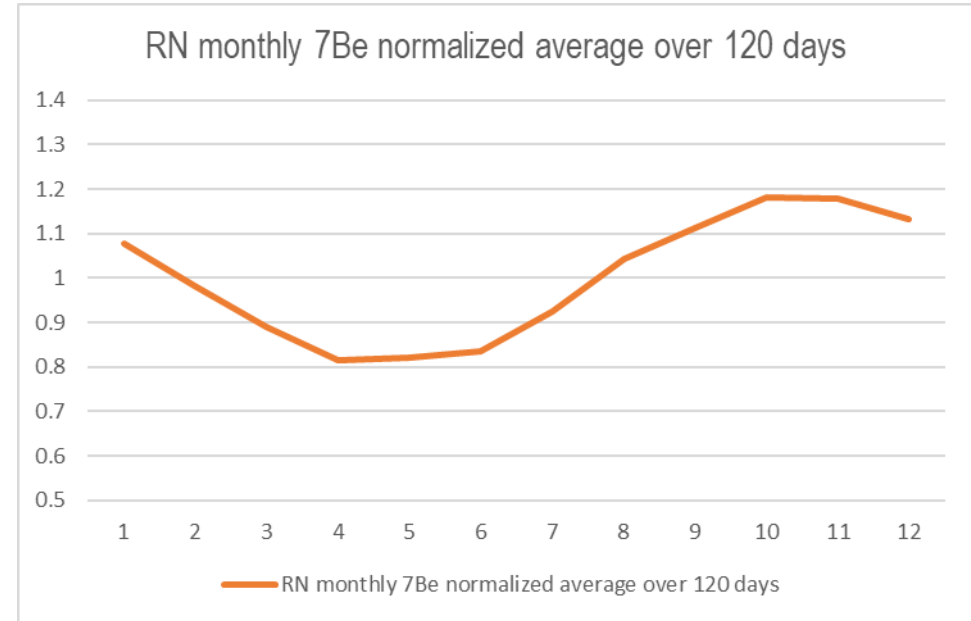

# RN27

### $^7\text{Be}$ data versus cosmic rays

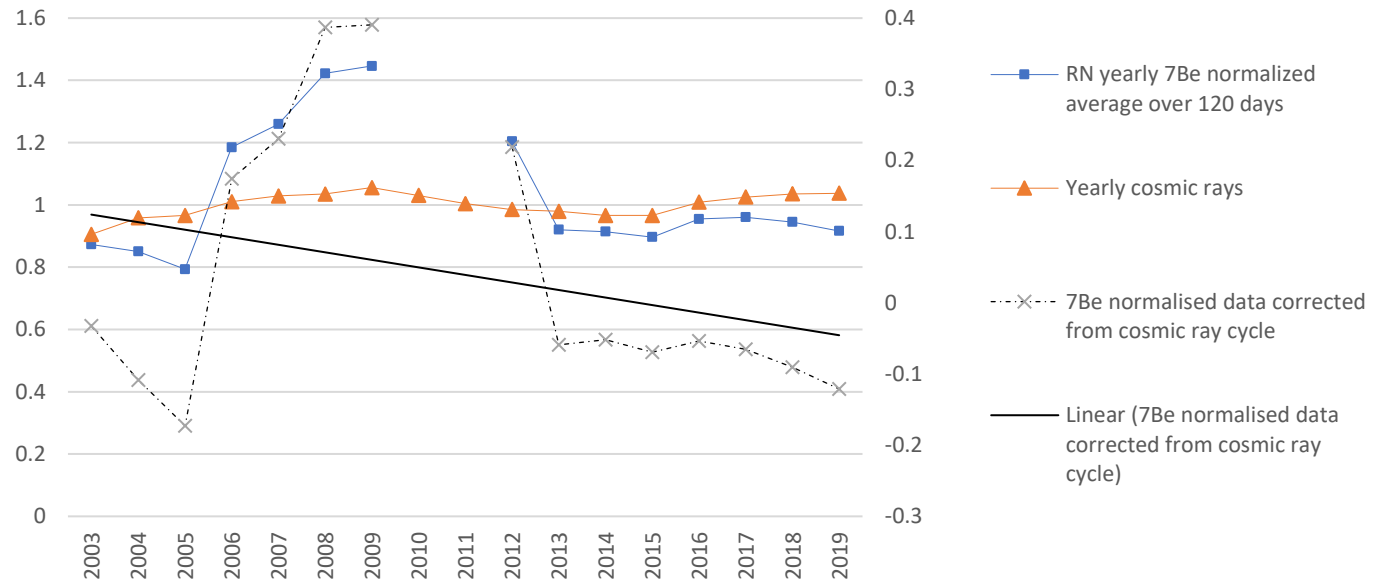

### RN monthly $^7\text{Be}$ normalized average over 120 days

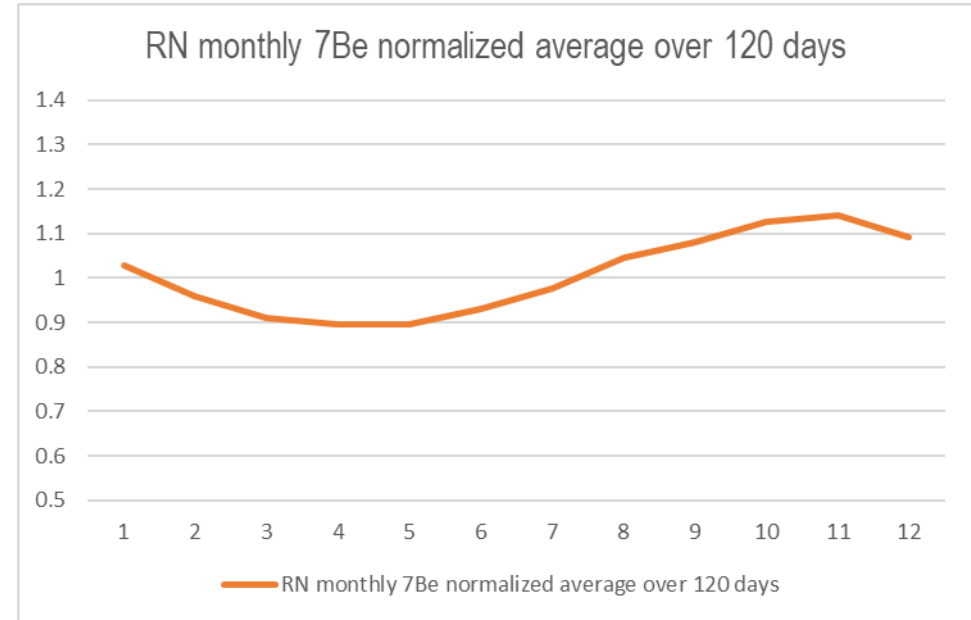

# RN28

### $^7\text{Be}$ data versus cosmic rays

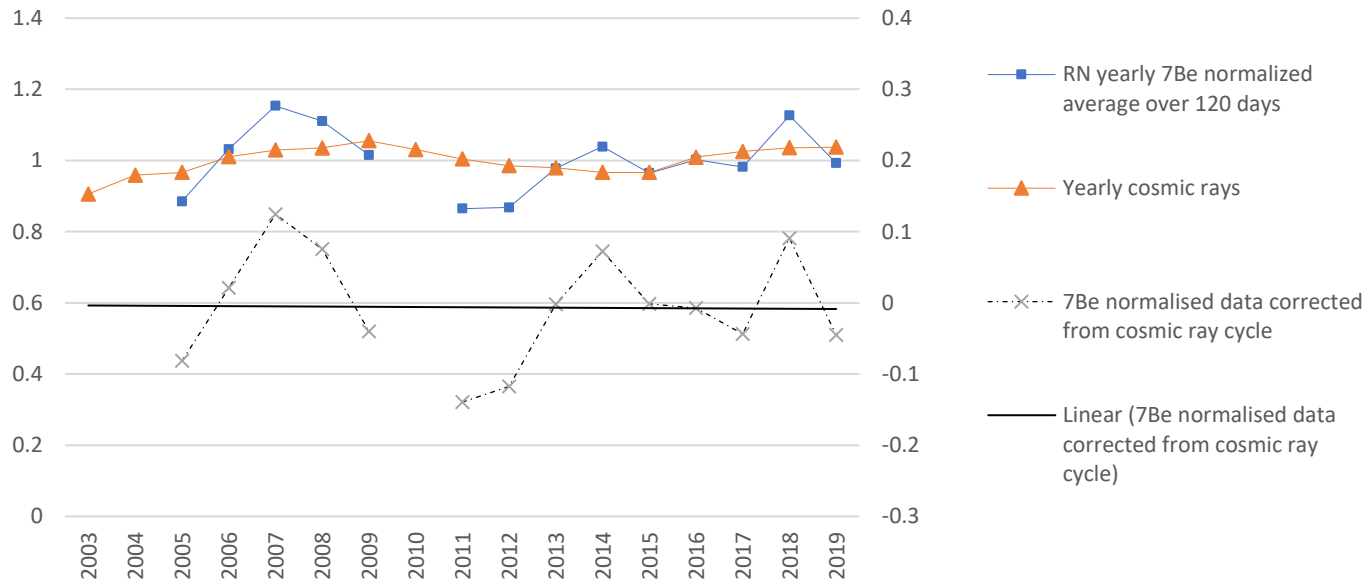

### RN monthly $^7\text{Be}$ normalized average over 120 days

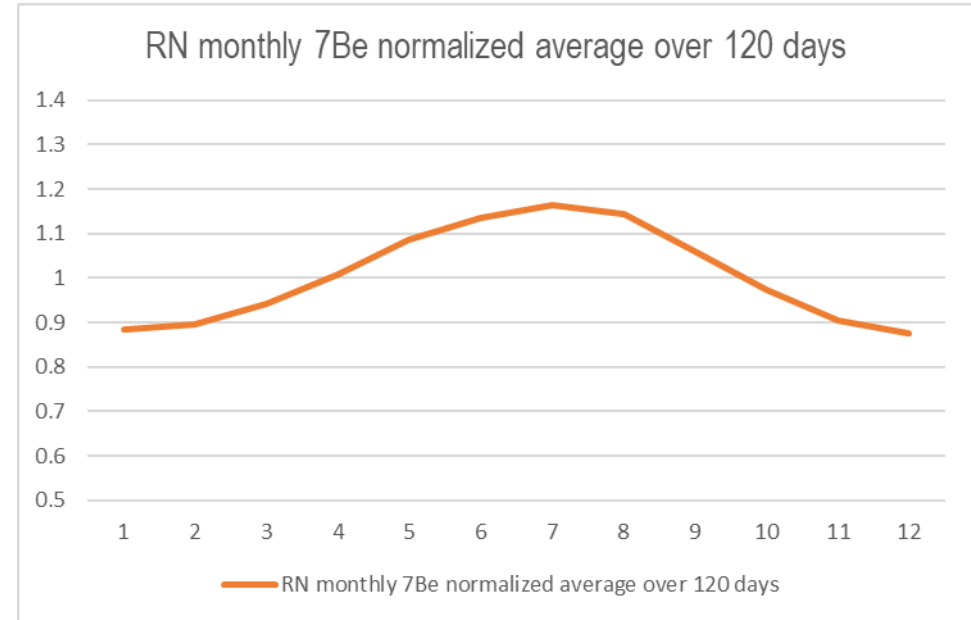

# RN29

### $^7\text{Be}$ data versus cosmic rays

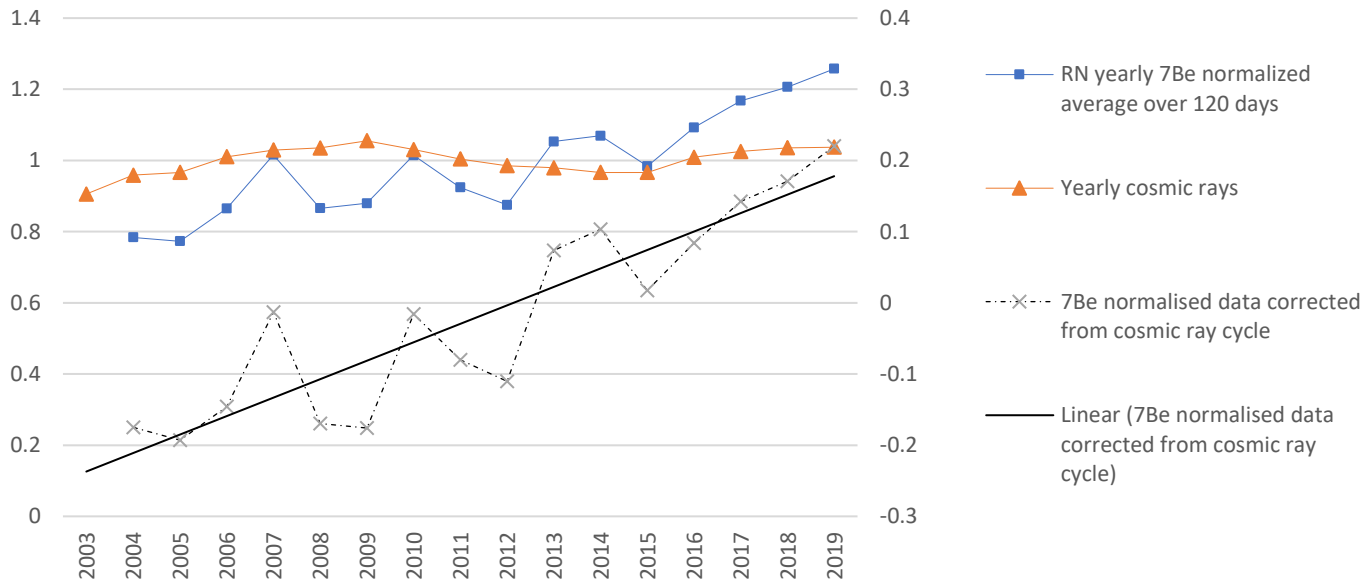

### RN monthly $^7\text{Be}$ normalized average over 120 days

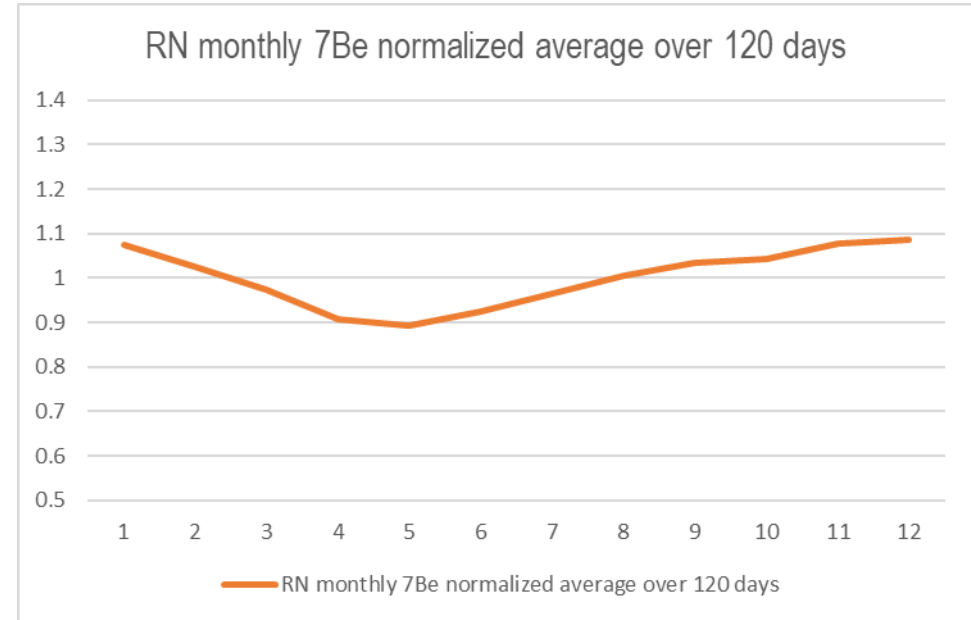

# RN30

$^7\text{Be}$  data versus cosmic rays

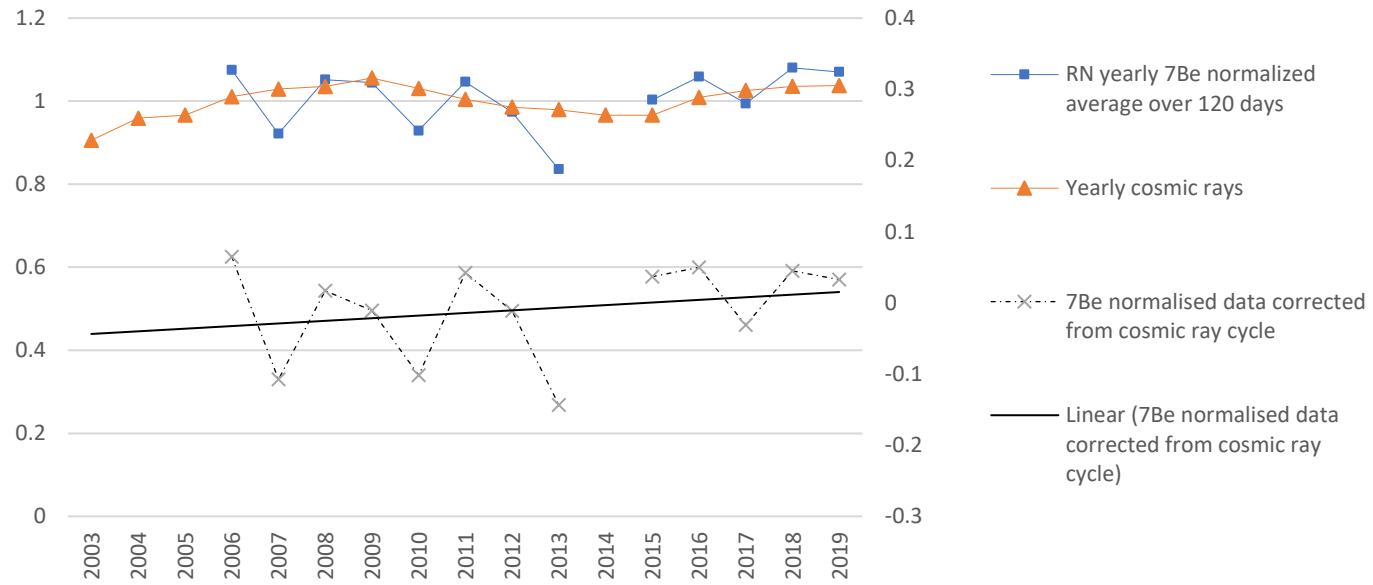

RN monthly  $^7\text{Be}$  normalized average over 120 days

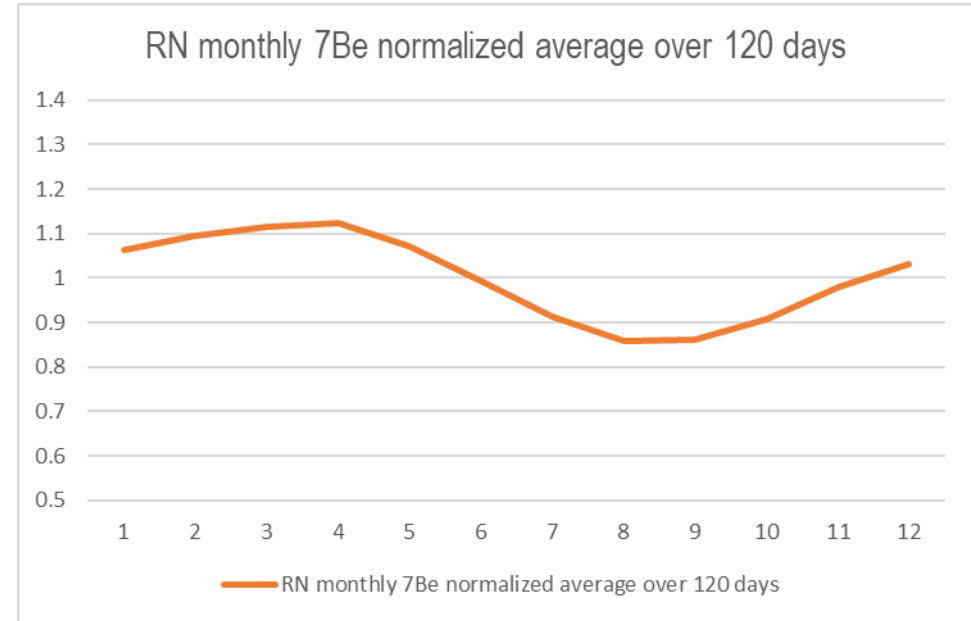



# RN31

$^7\text{Be}$  data versus cosmic rays

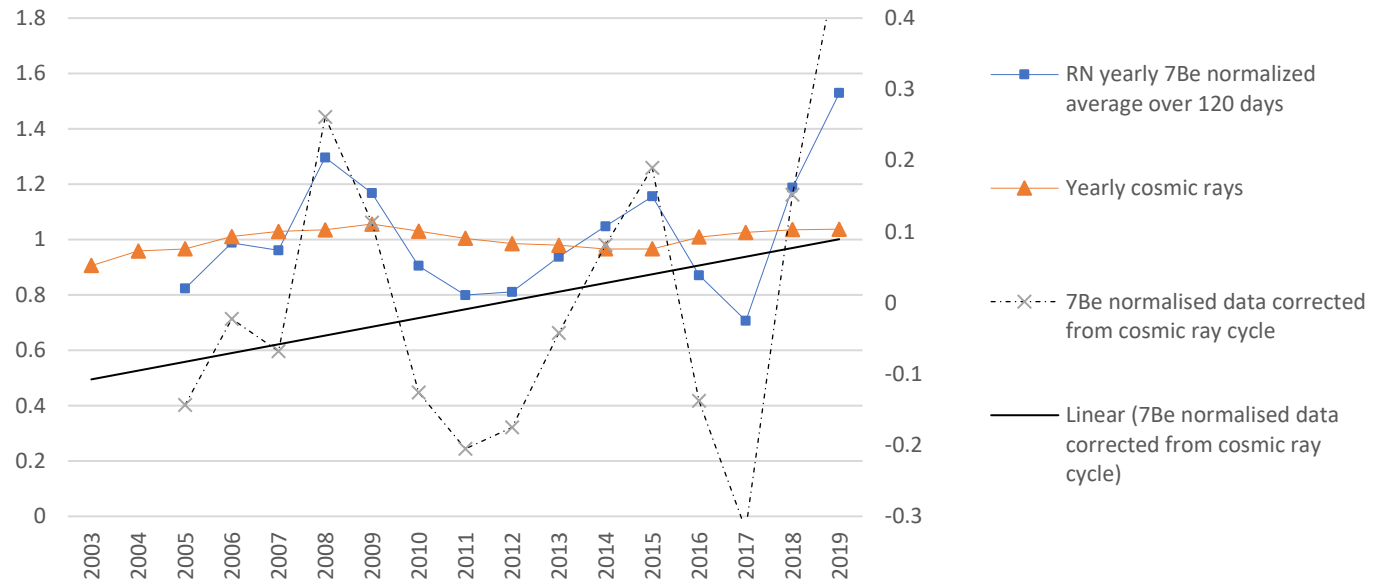

RN monthly  $^7\text{Be}$  normalized average over 120 days

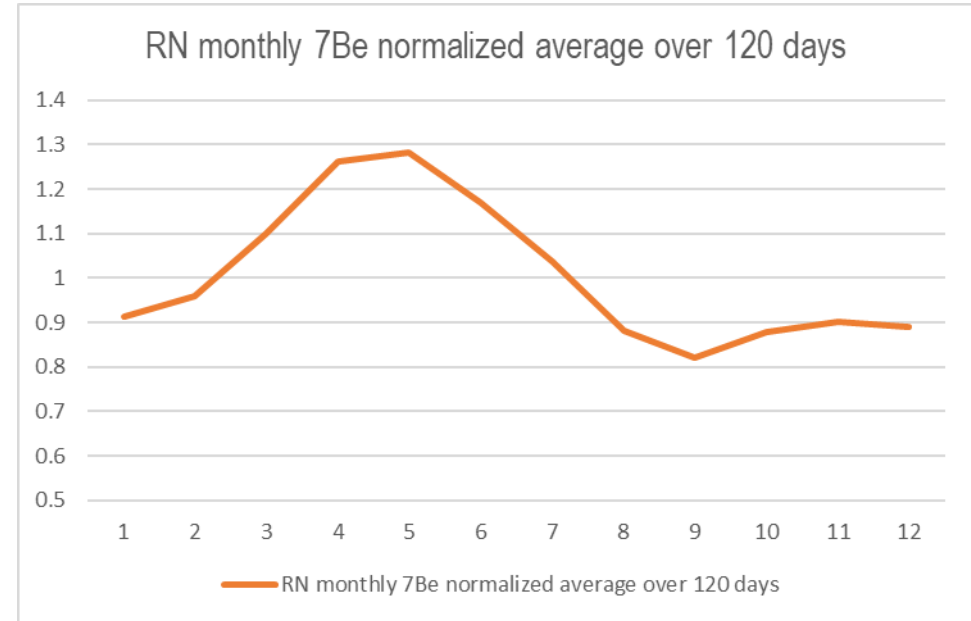

# RN33

$^7\text{Be}$  data versus cosmic rays

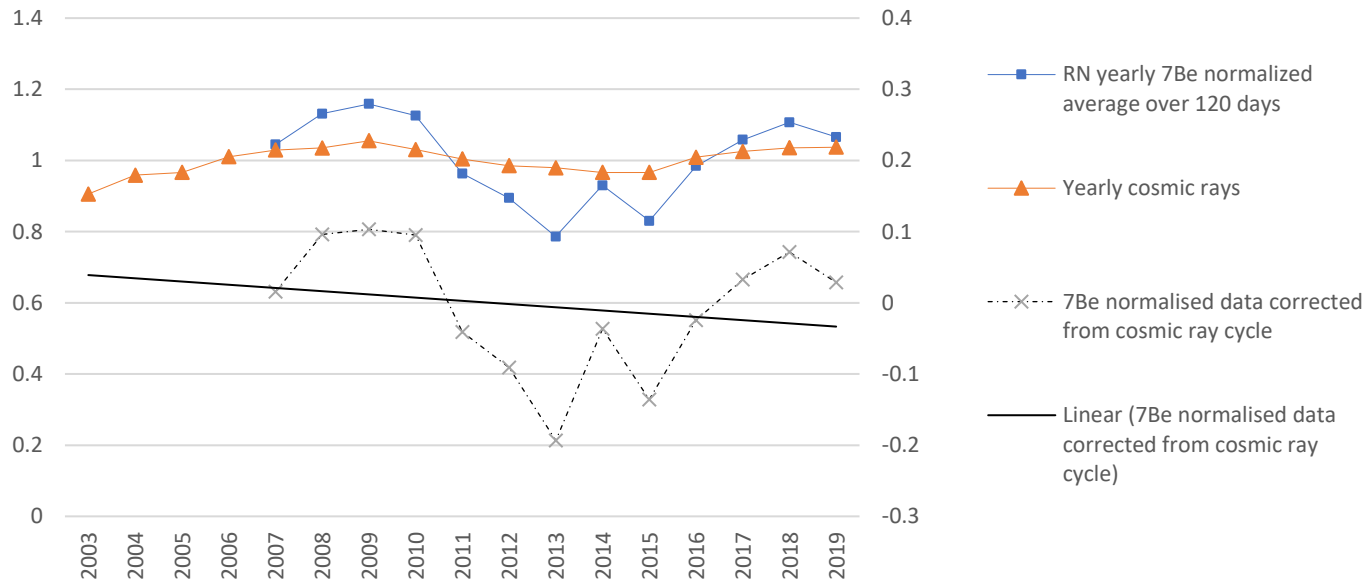

RN monthly  $^7\text{Be}$  normalized average over 120 days

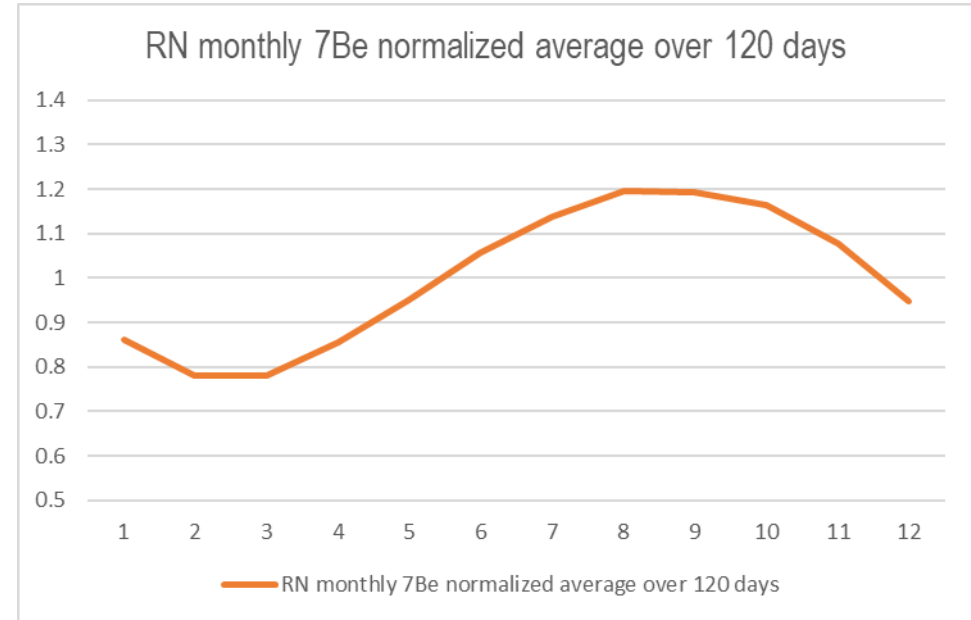

# RN34

$^7\text{Be}$  data versus cosmic rays

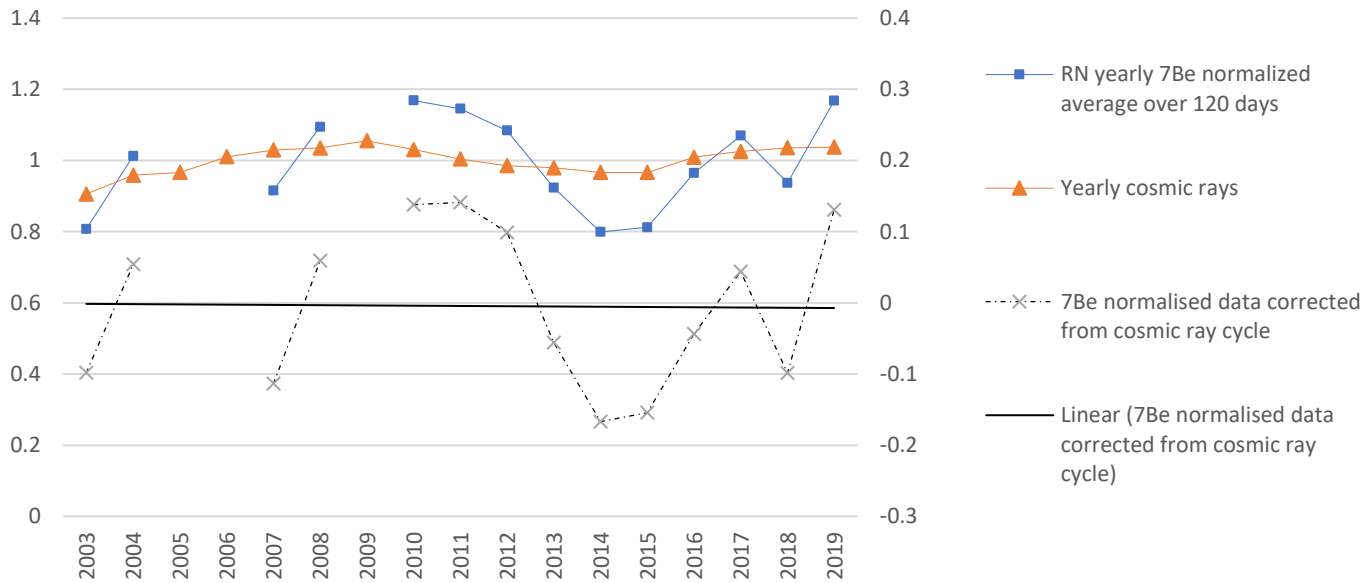

RN monthly  $^7\text{Be}$  normalized average over 120 days

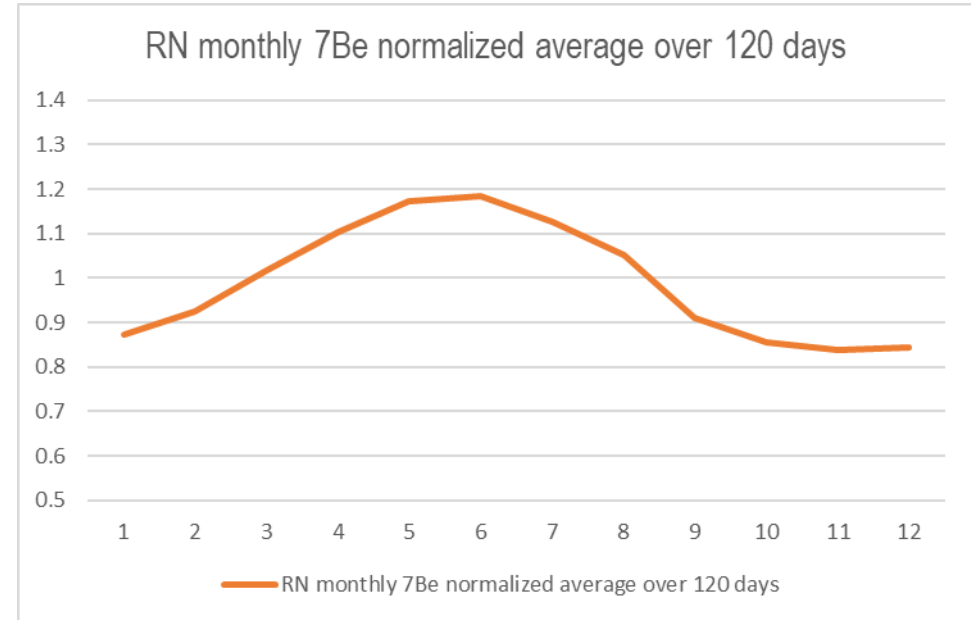

# RN37

$^7\text{Be}$  data versus cosmic rays

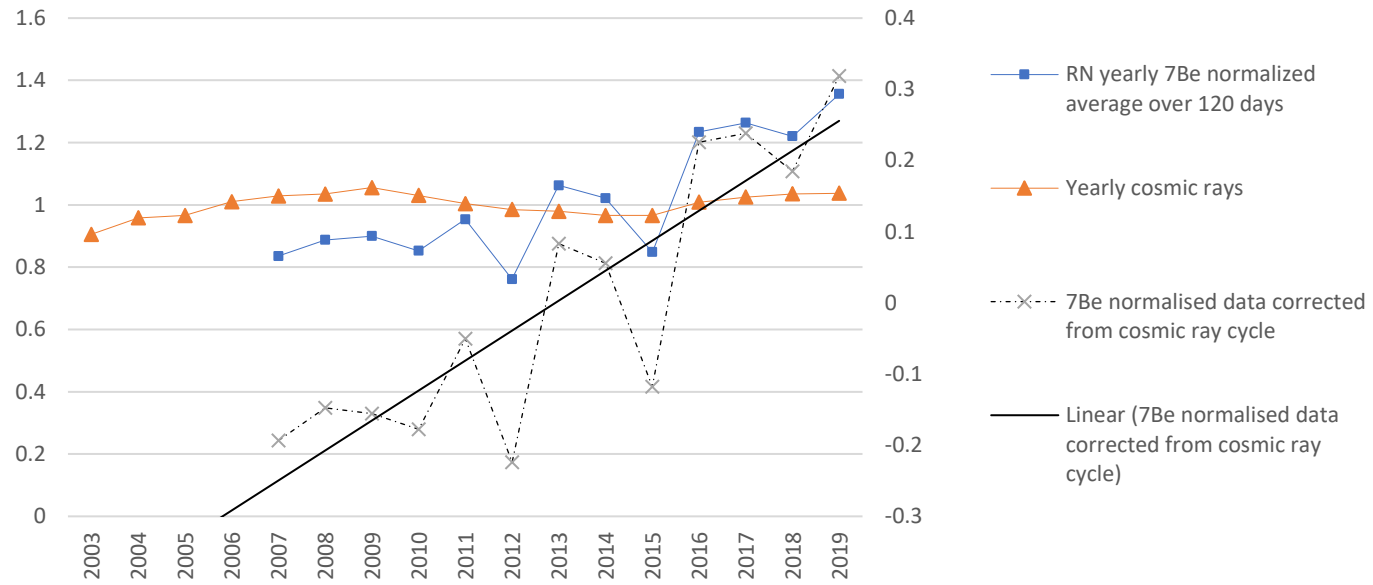

RN monthly  $^7\text{Be}$  normalized average over 120 days

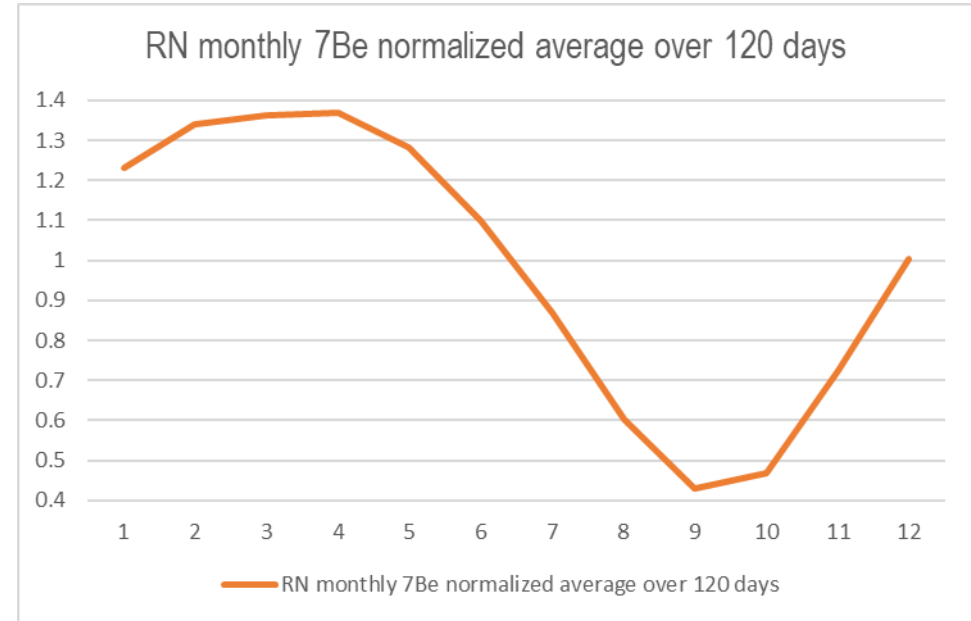

# RN38

$^7\text{Be}$  data versus cosmic rays

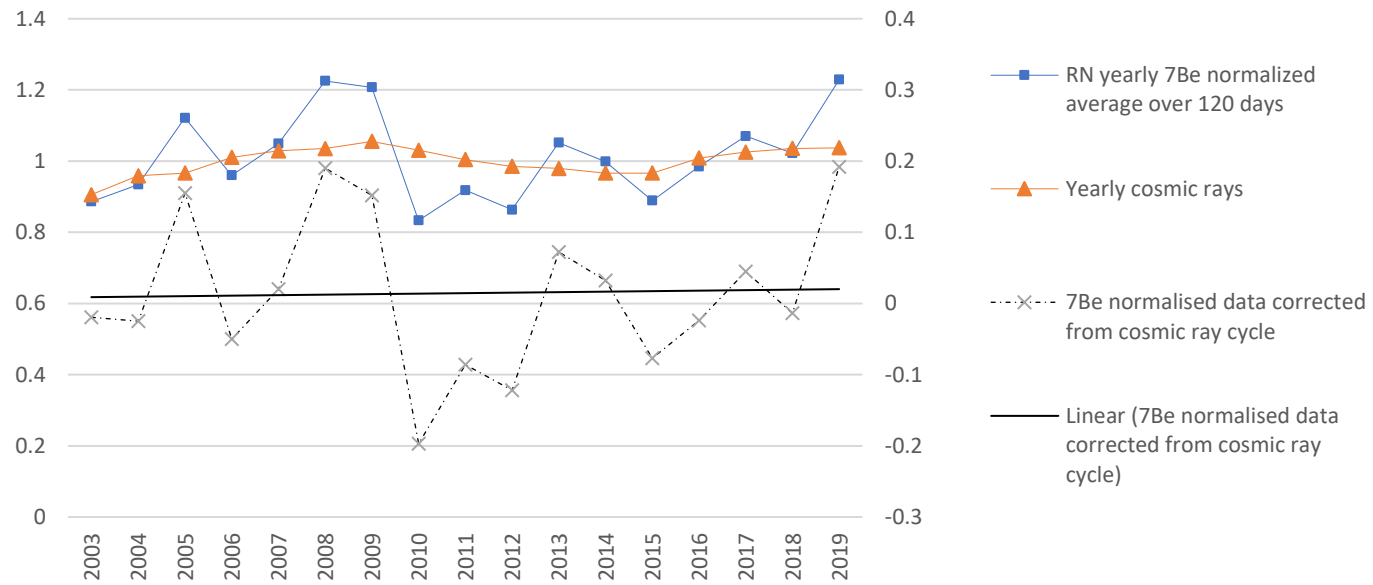

RN monthly  $^7\text{Be}$  normalized average over 120 days

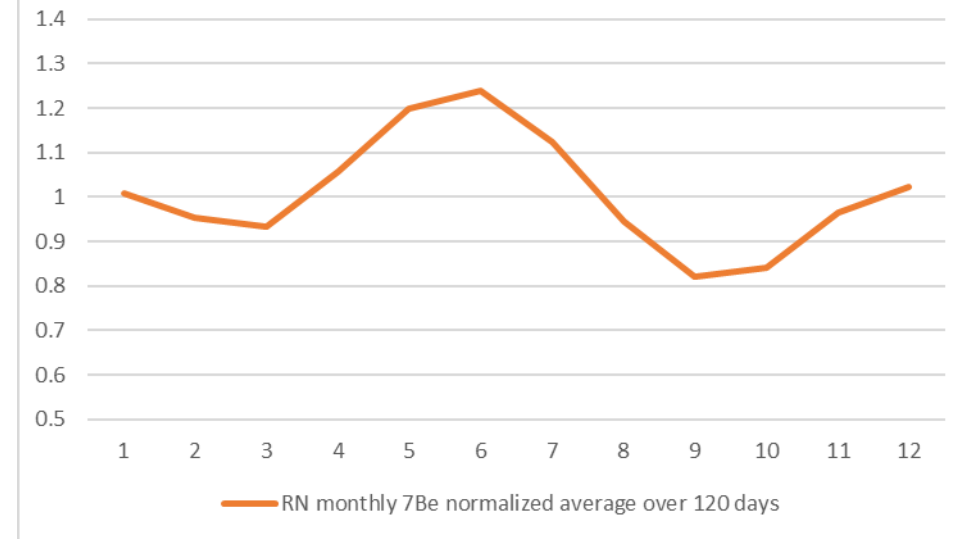

# RN39

$^7\text{Be}$  data versus cosmic rays

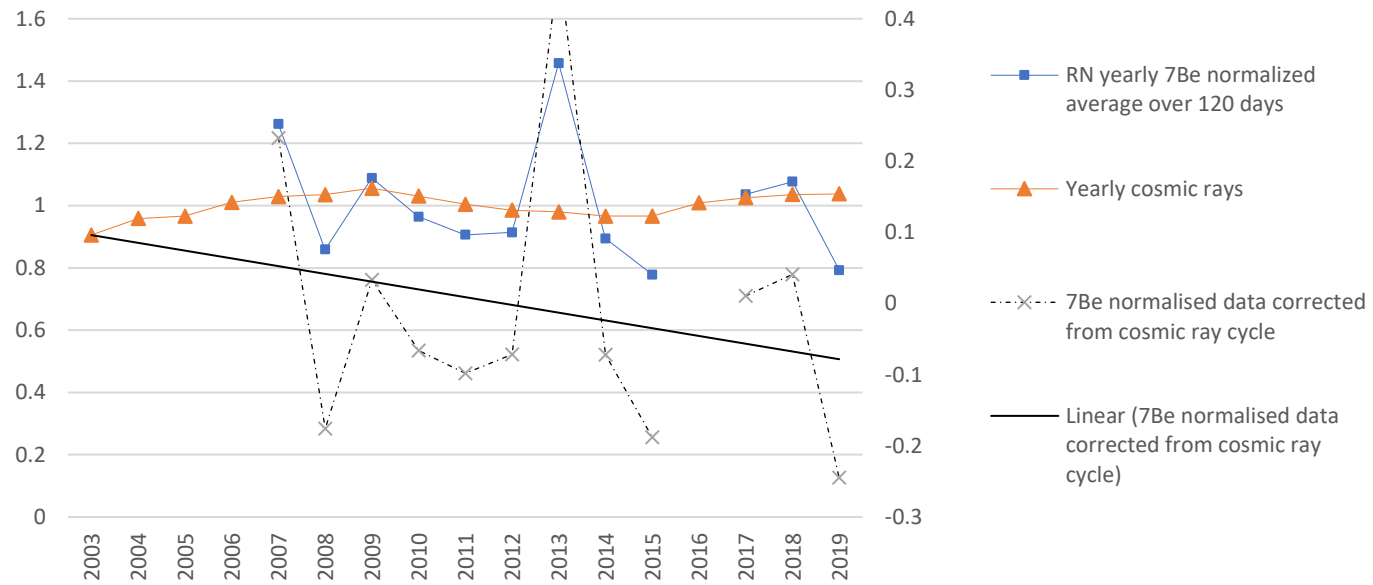

RN monthly  $^7\text{Be}$  normalized average over 120 days

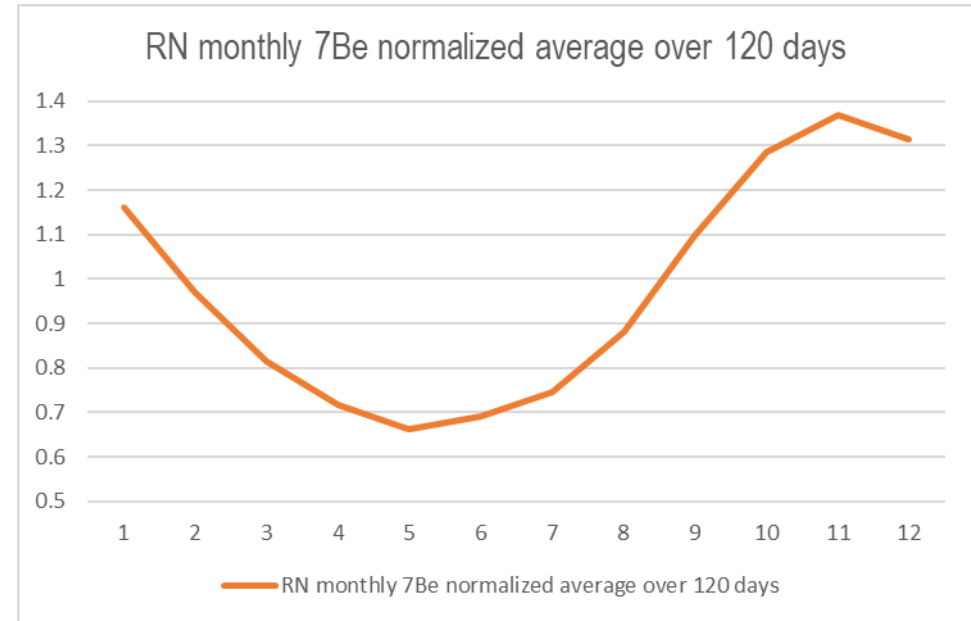

# RN40

$^7\text{Be}$  data versus cosmic rays

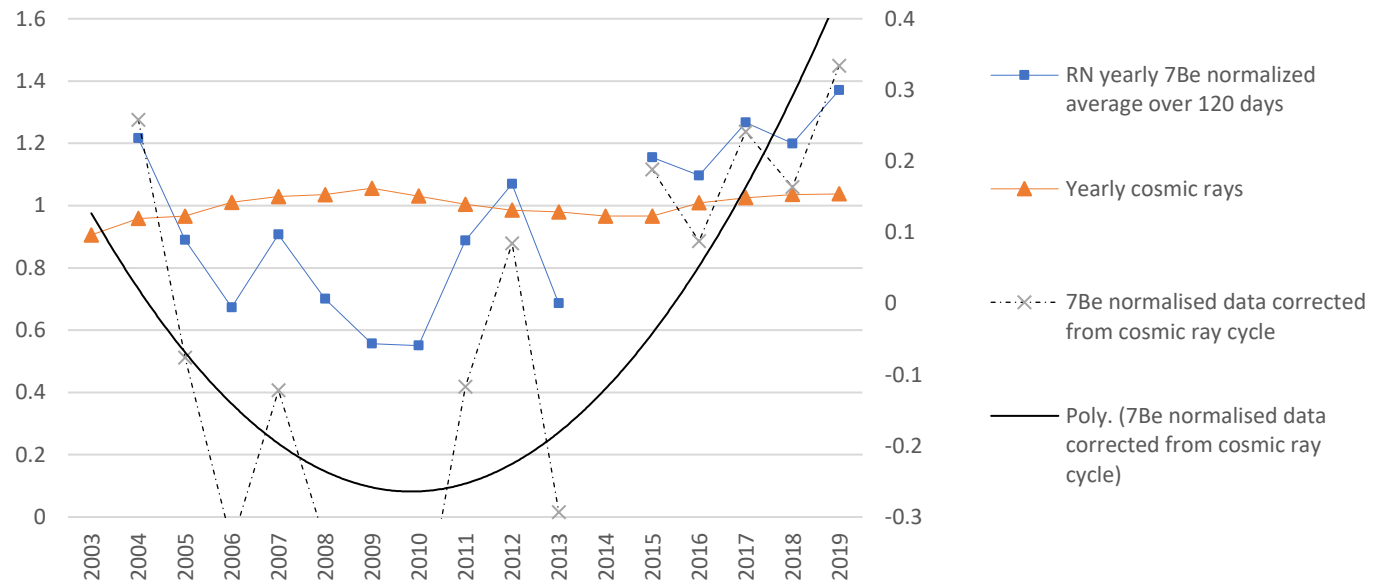

RN monthly  $^7\text{Be}$  normalized average over 120 days

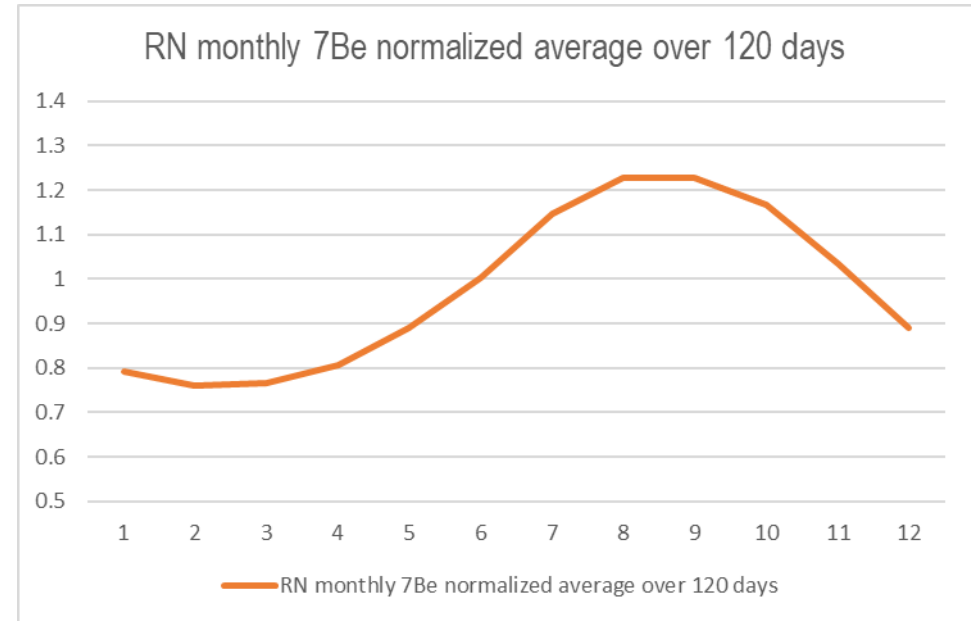

# RN42

<sup>7</sup>Be data versus cosmic rays

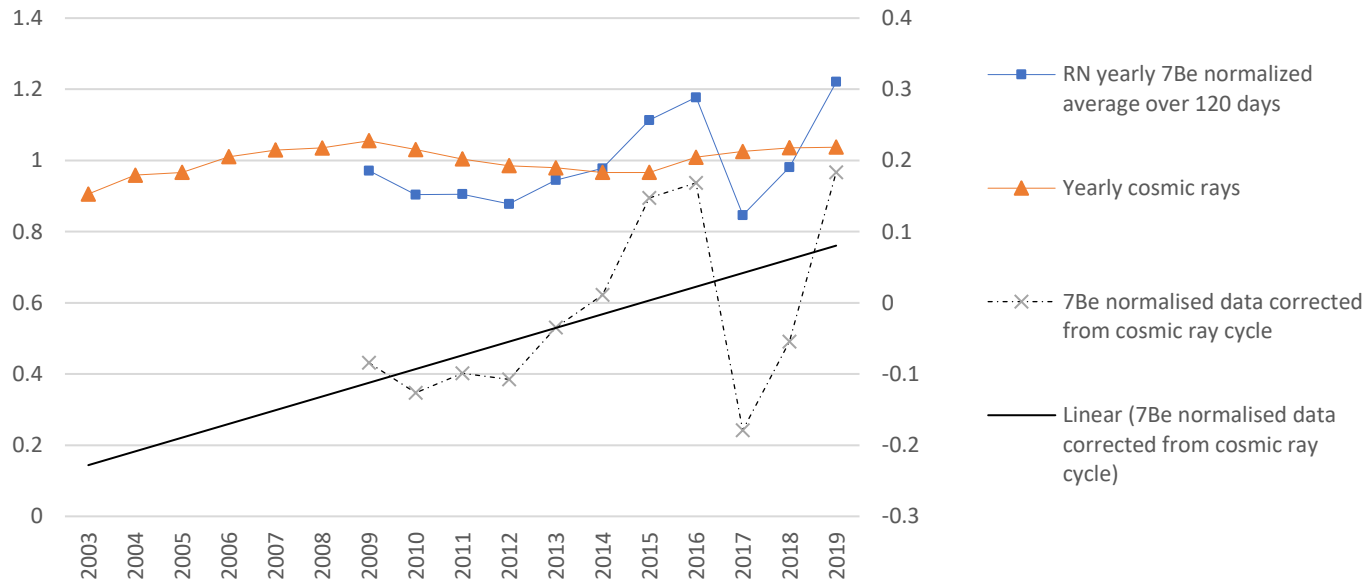

RN monthly <sup>7</sup>Be normalized average over 120 days

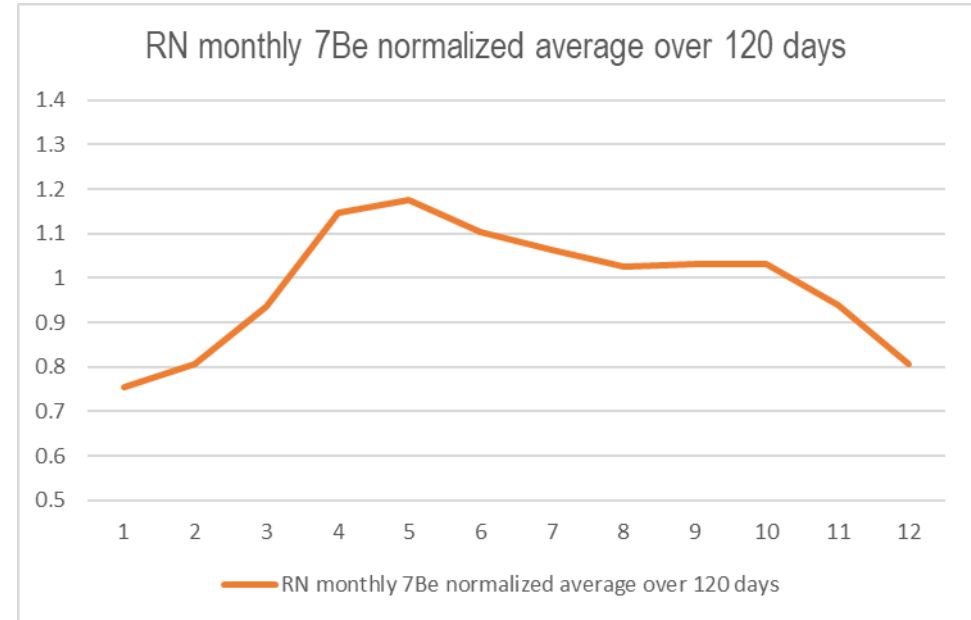



# RN43

$^7\text{Be}$  data versus cosmic rays

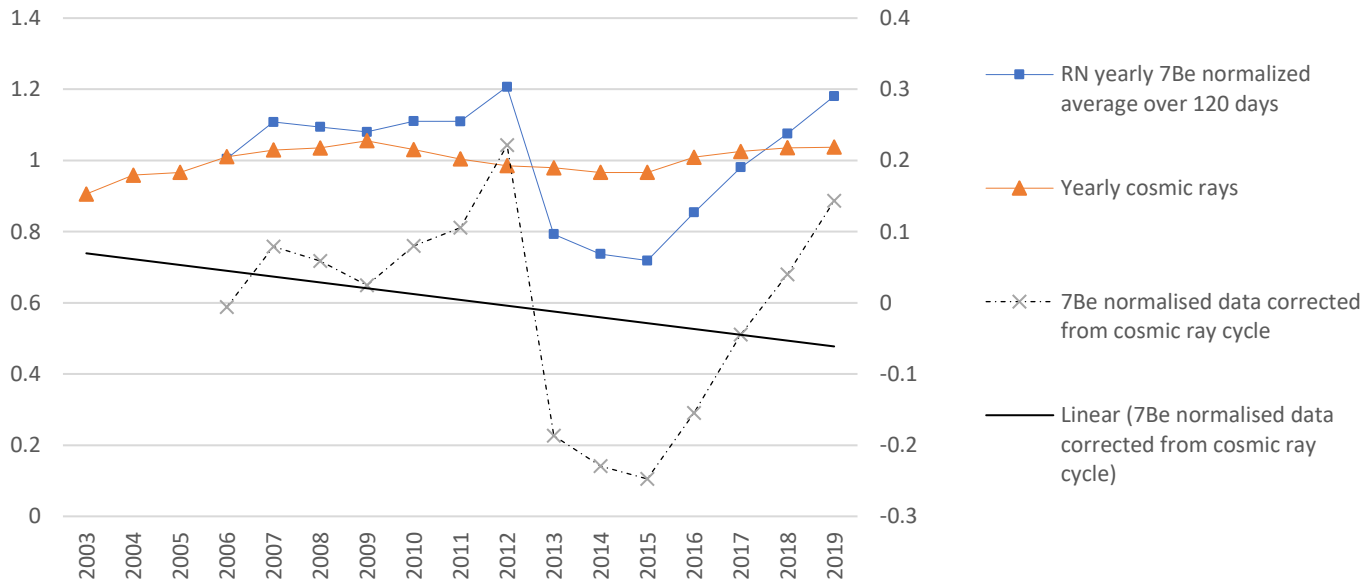

RN monthly  $^7\text{Be}$  normalized average over 120 days

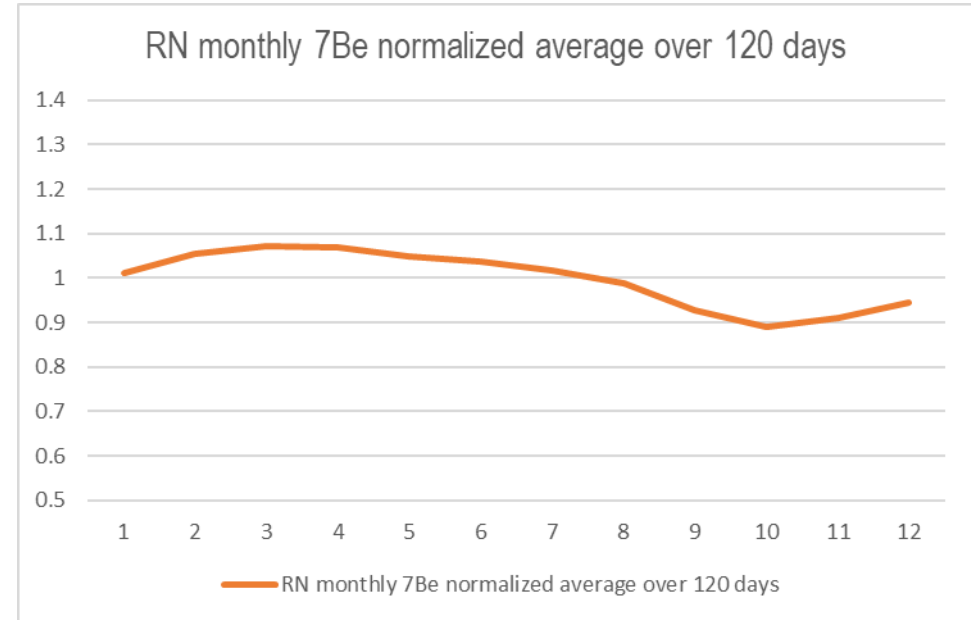

# RN44

$^7\text{Be}$  data versus cosmic rays

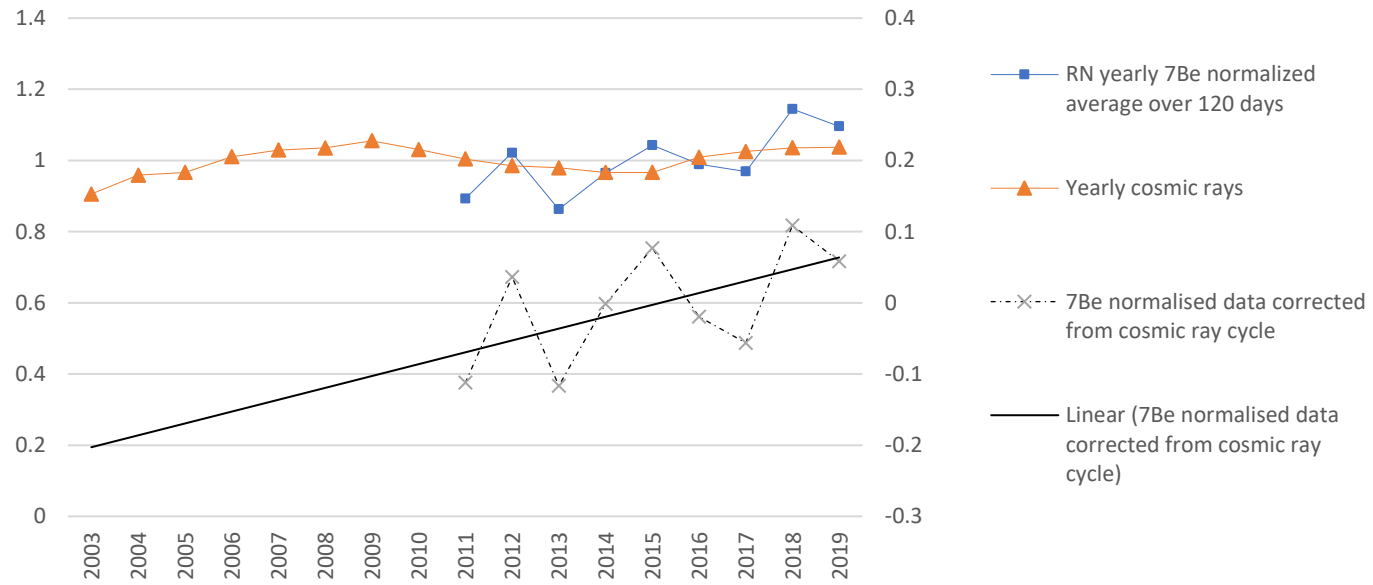

RN monthly  $^7\text{Be}$  normalized average over 120 days

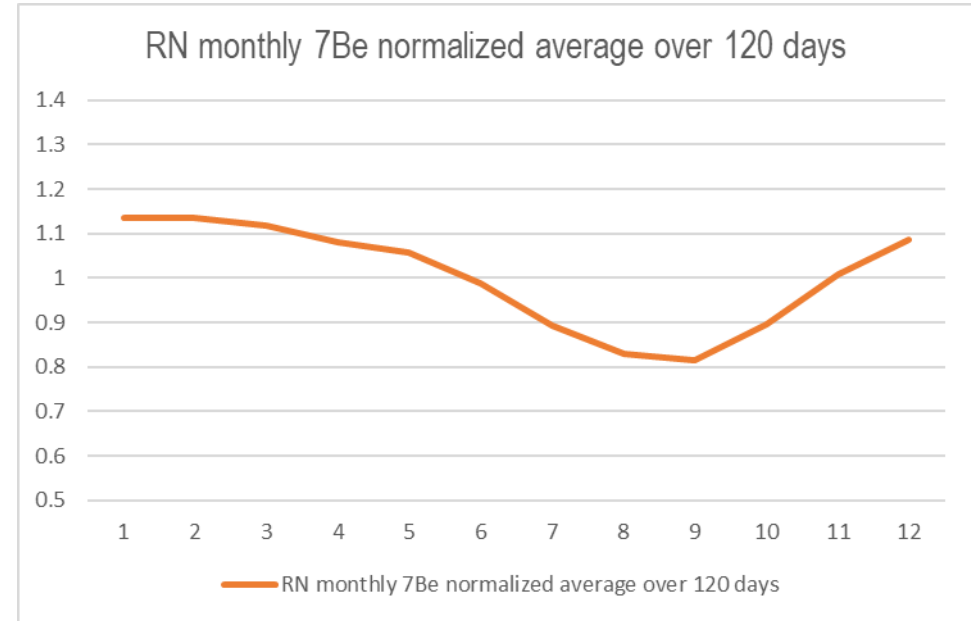

# RN45

$^7\text{Be}$  data versus cosmic rays

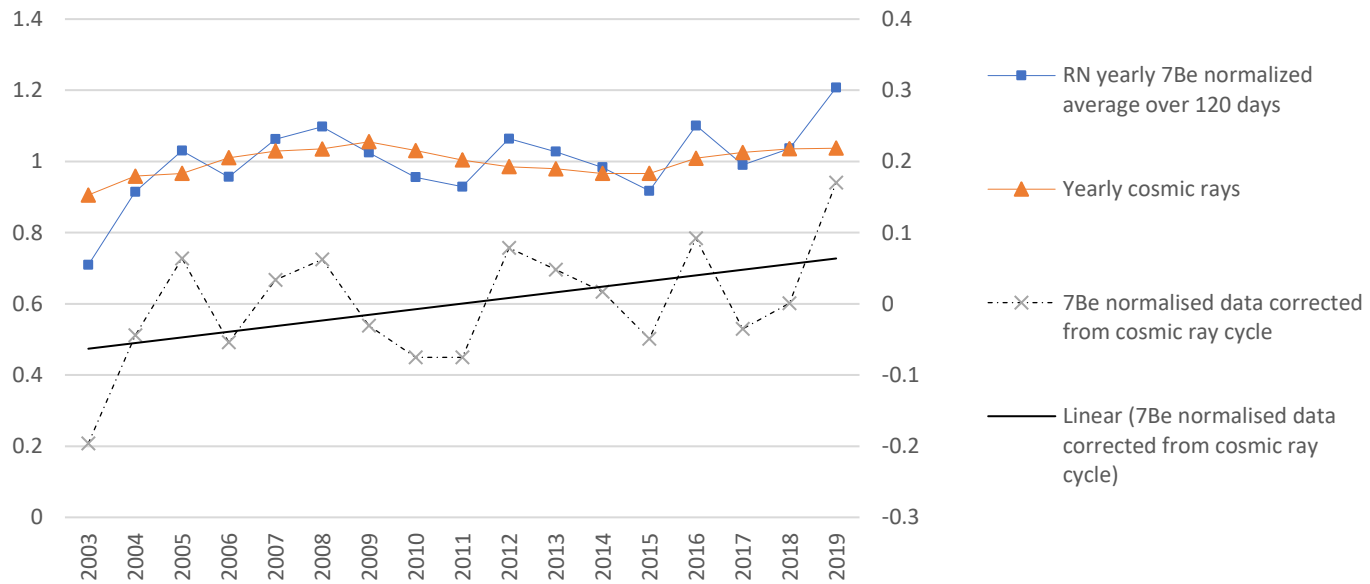

RN monthly  $^7\text{Be}$  normalized average over 120 days

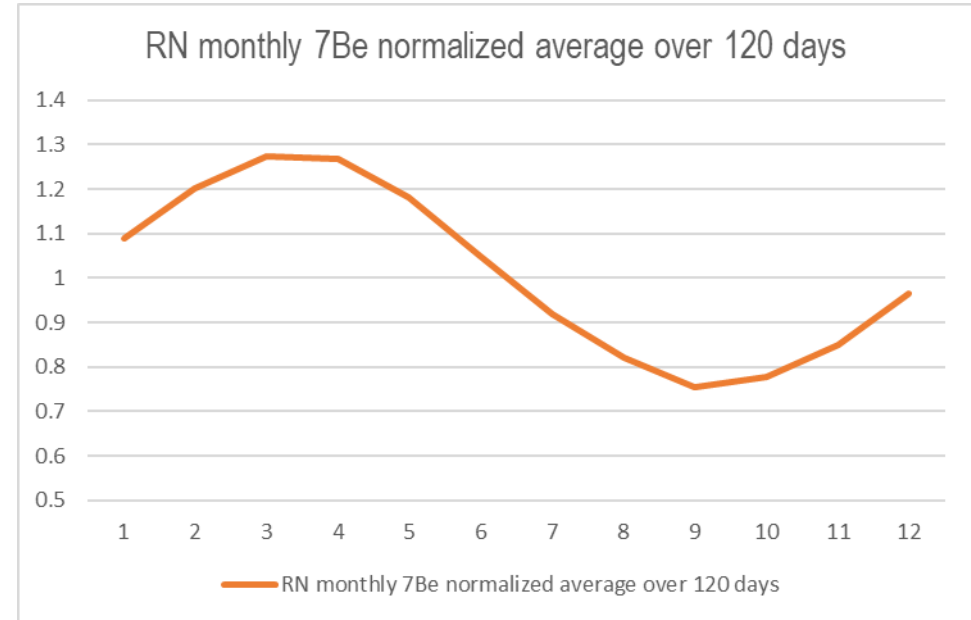

# RN46

$^7\text{Be}$  data versus cosmic rays

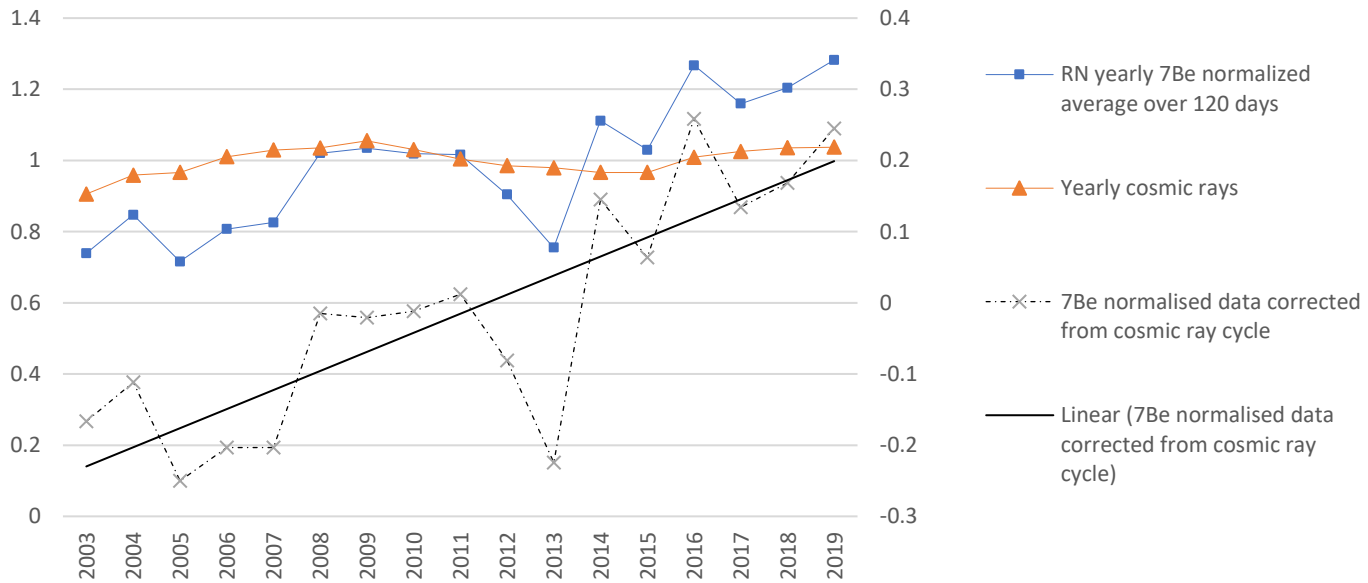

RN monthly  $^7\text{Be}$  normalized average over 120 days

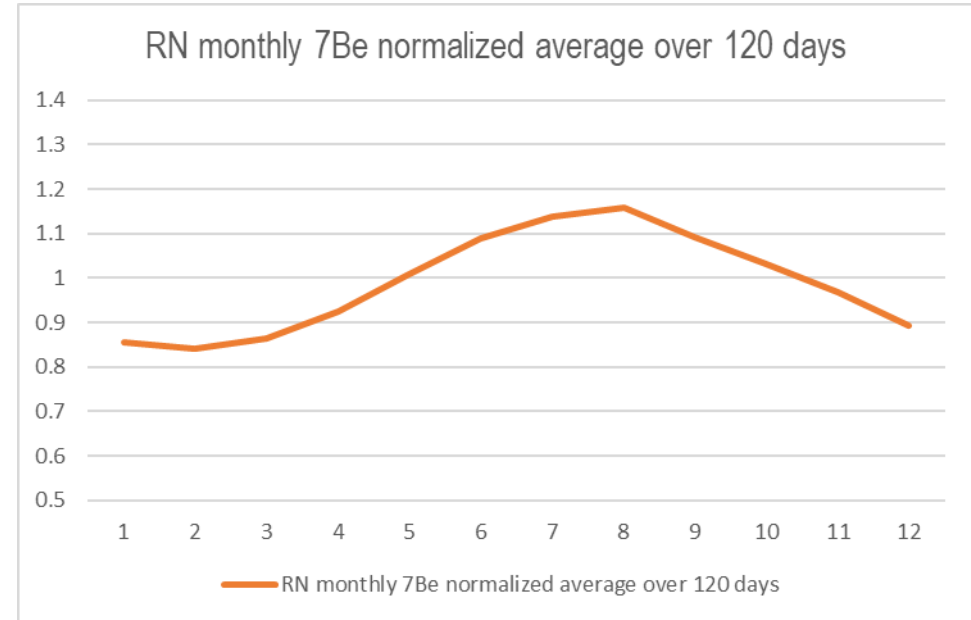

# RN47

$^7\text{Be}$  data versus cosmic rays

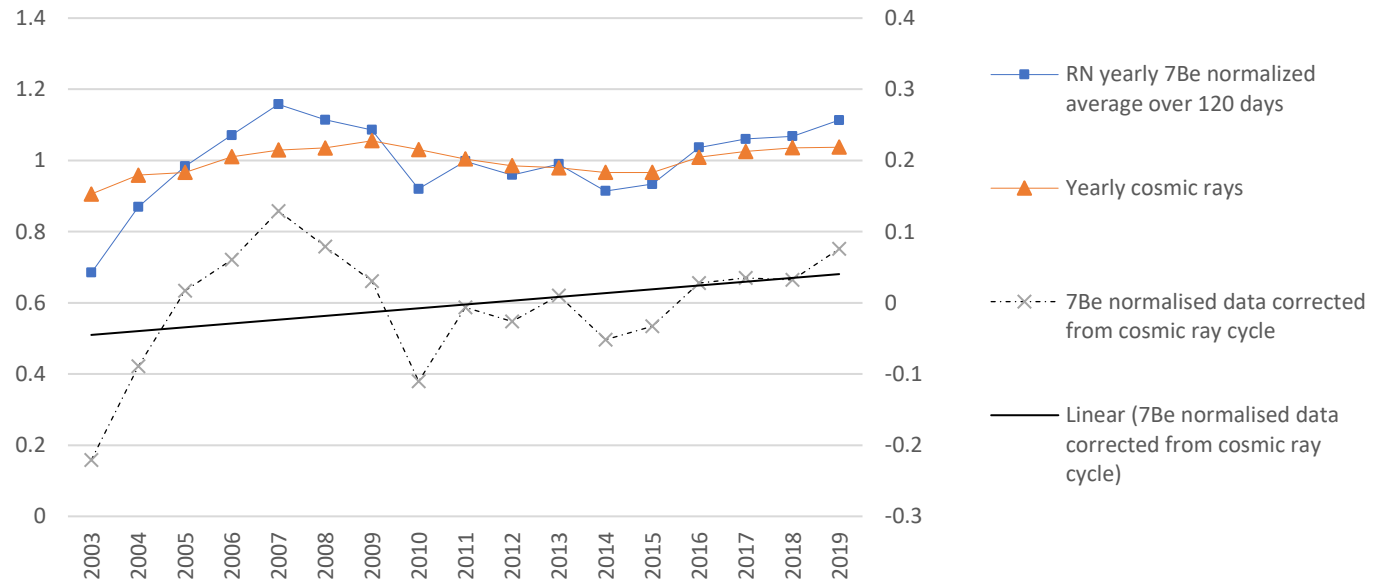

RN monthly  $^7\text{Be}$  normalized average over 120 days

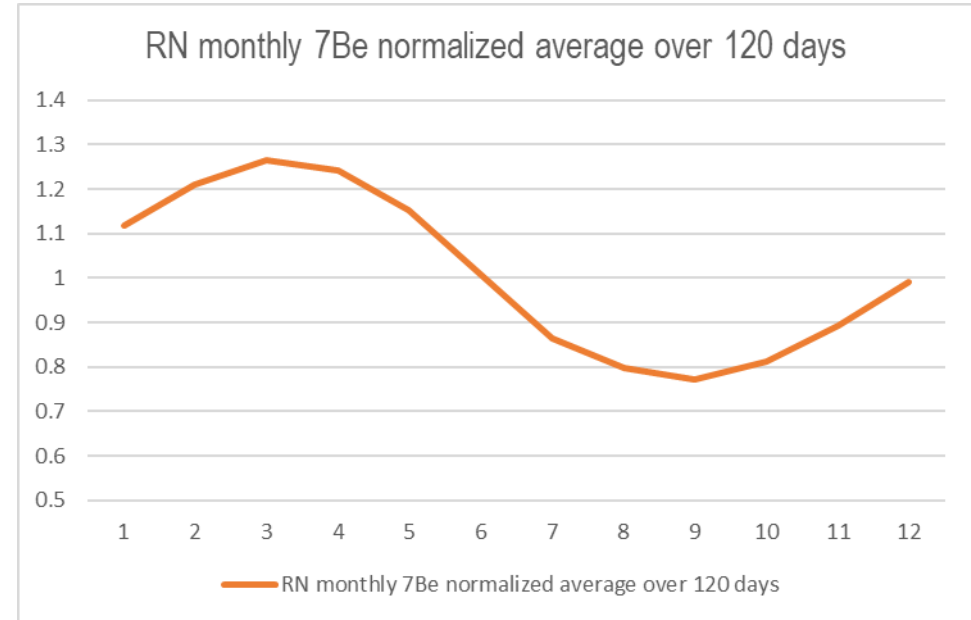

# RN49

$^7\text{Be}$  data versus cosmic rays

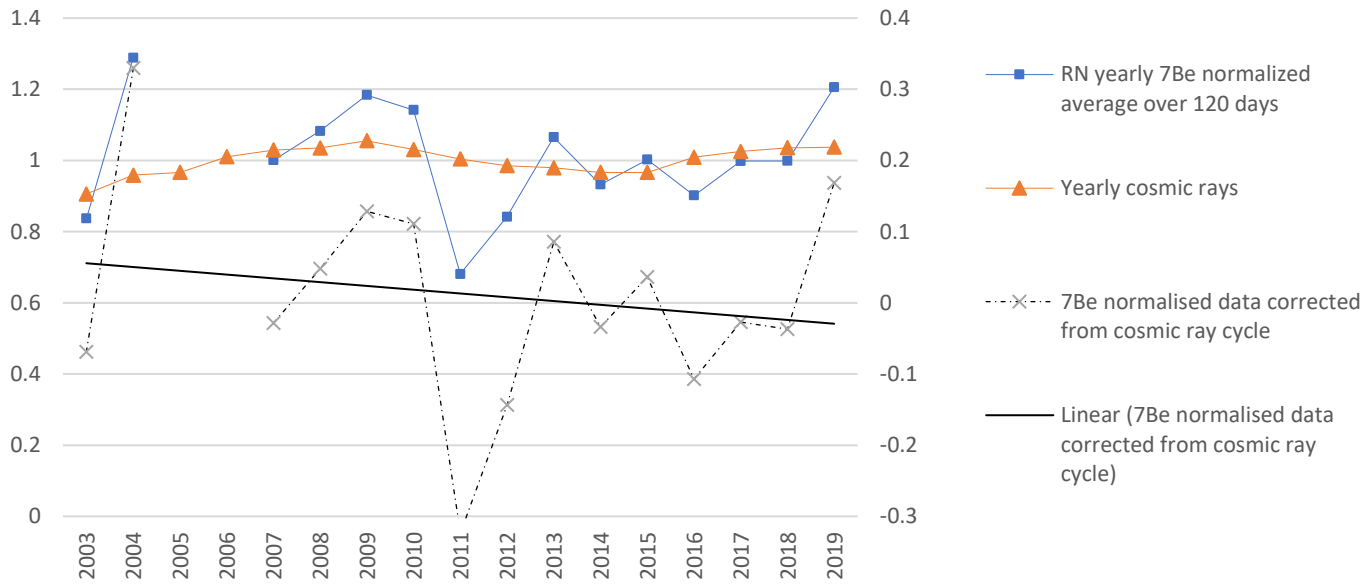

RN monthly  $^7\text{Be}$  normalized average over 120 days

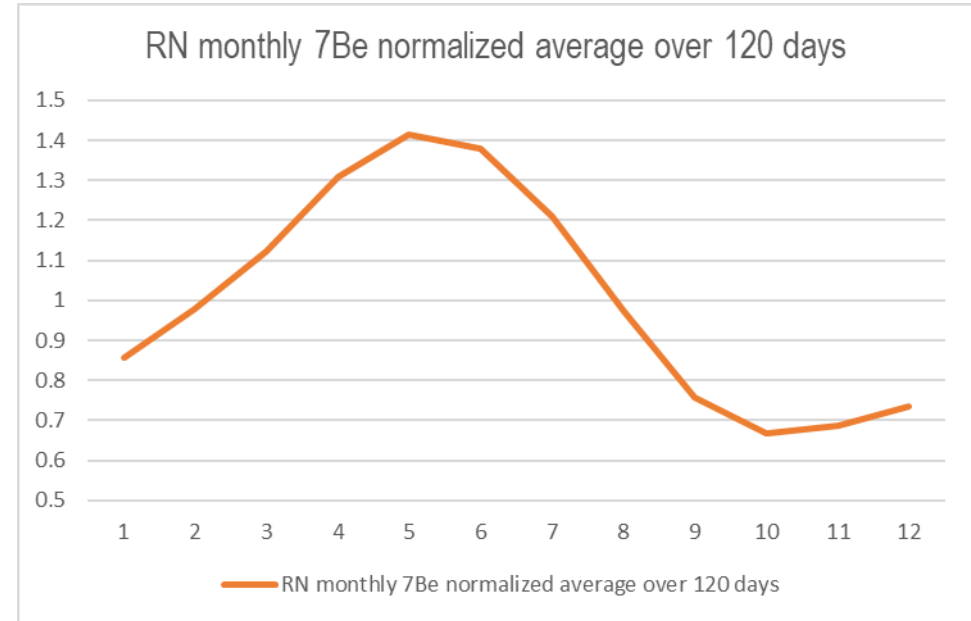

# RN50

$^7\text{Be}$  data versus cosmic rays

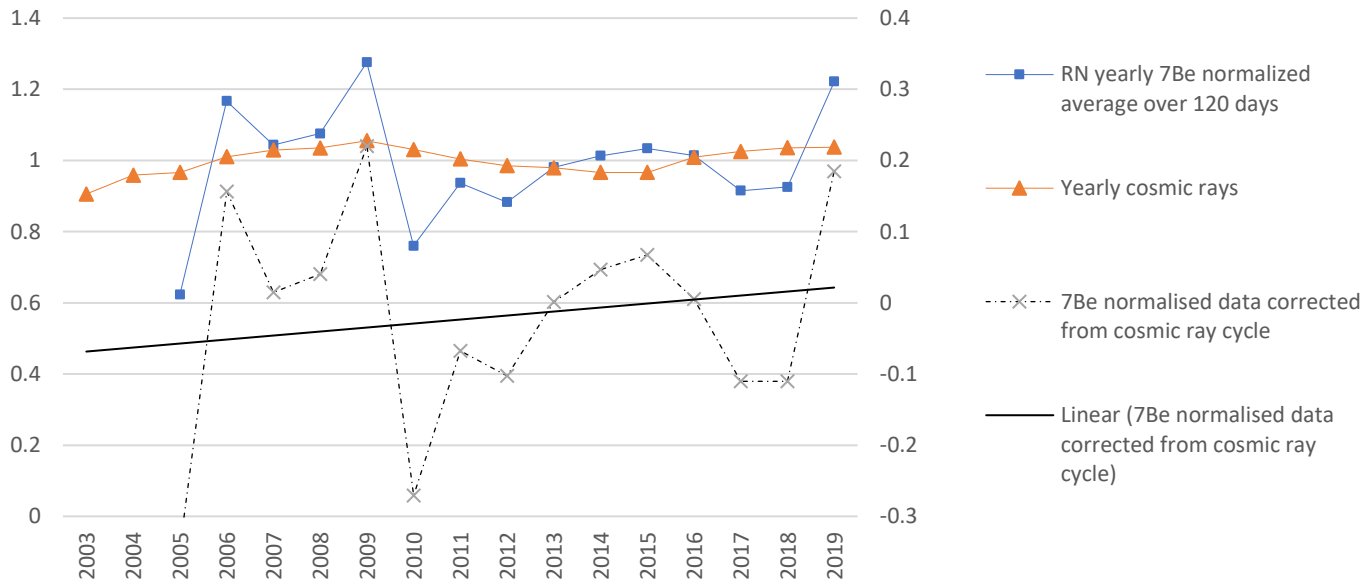

RN monthly  $^7\text{Be}$  normalized average over 120 days

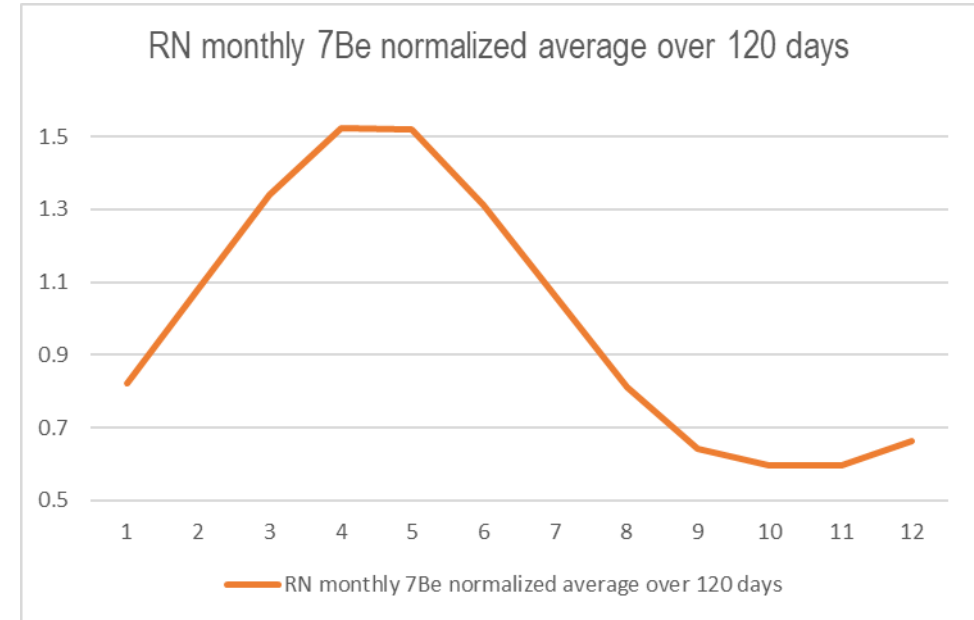

# RN51

$^7\text{Be}$  data versus cosmic rays

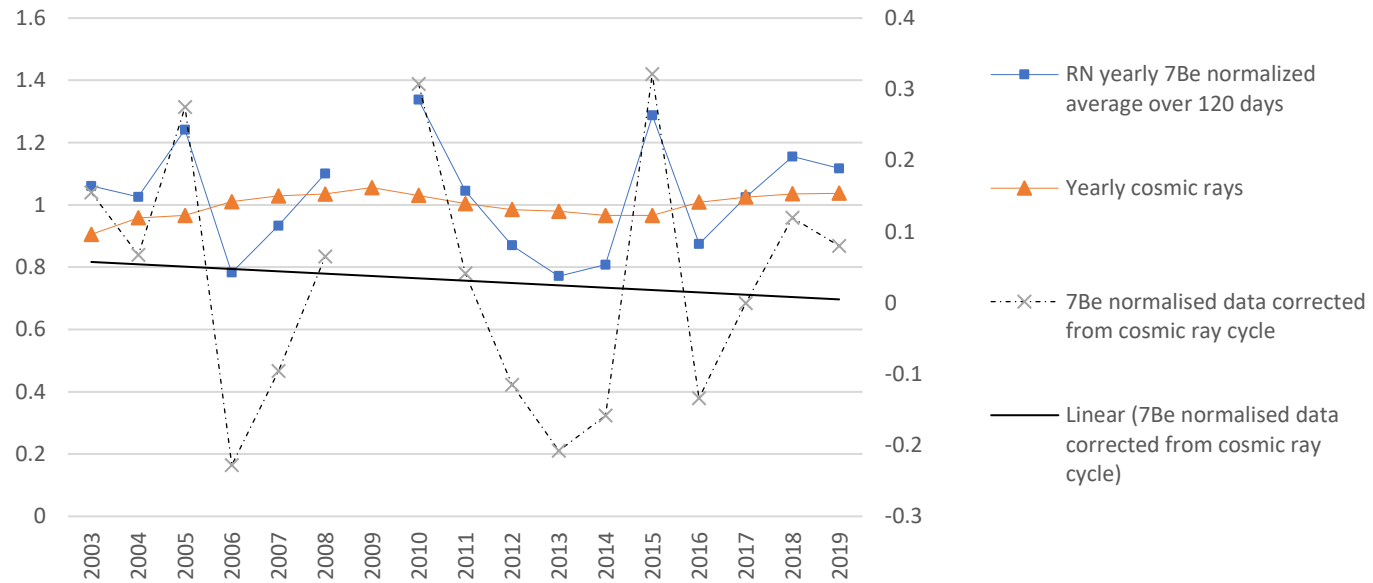

RN monthly  $^7\text{Be}$  normalized average over 120 days

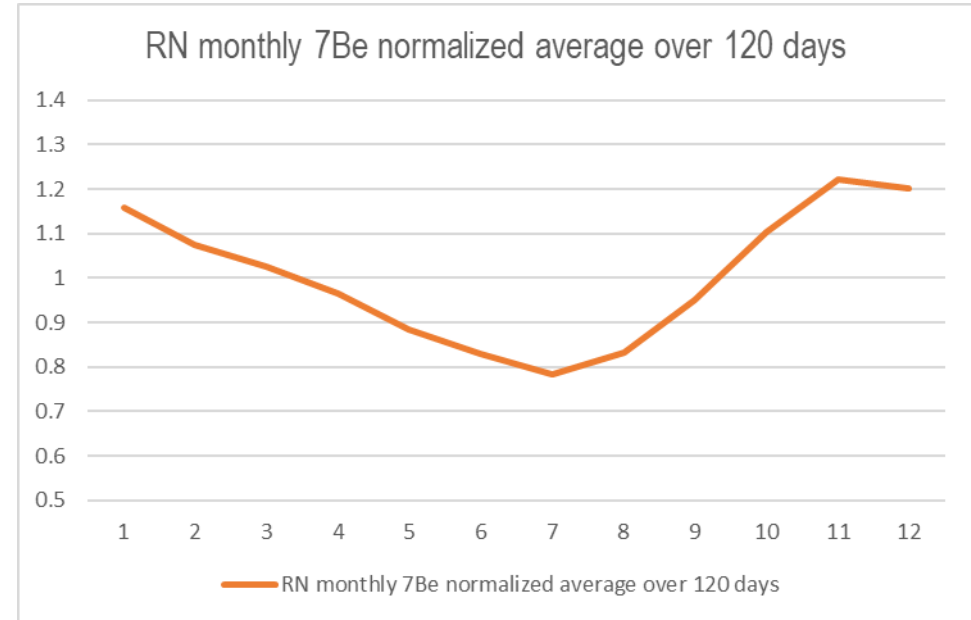



# RN52

$^7\text{Be}$  data versus cosmic rays

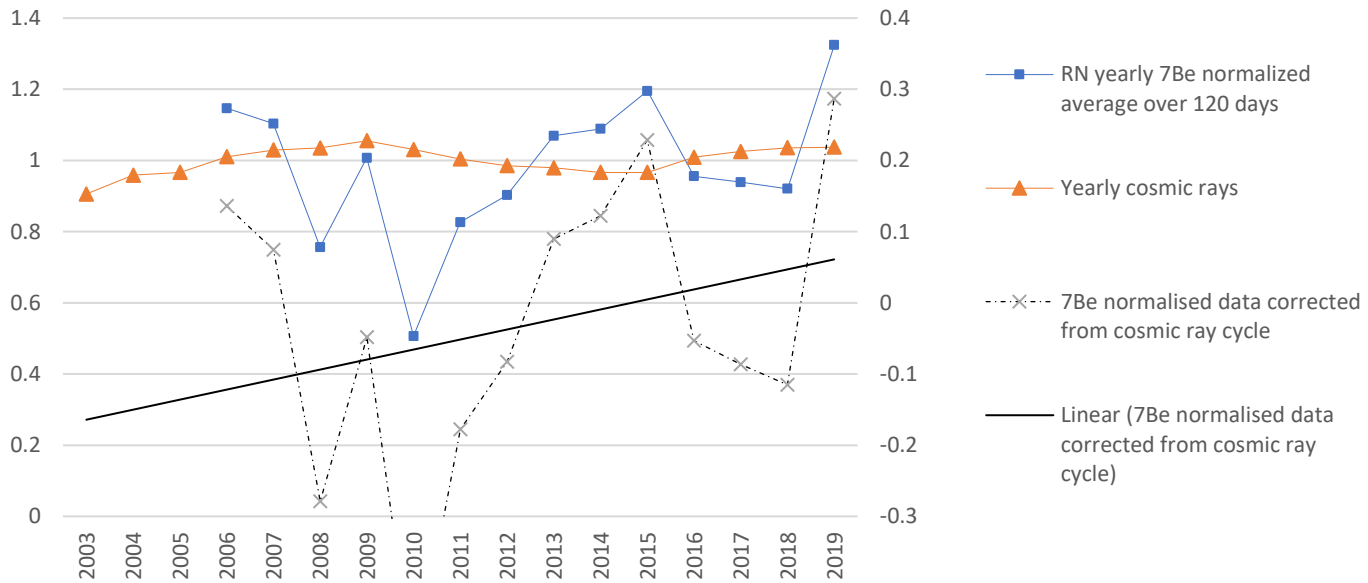

RN monthly  $^7\text{Be}$  normalized average over 120 days

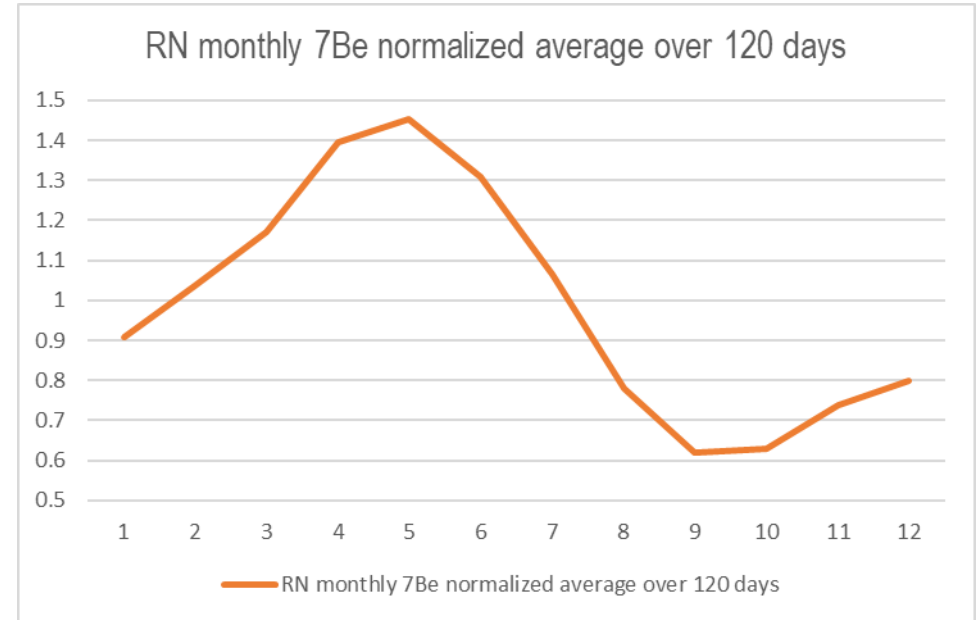

# RN53

<sup>7</sup>Be data versus cosmic rays

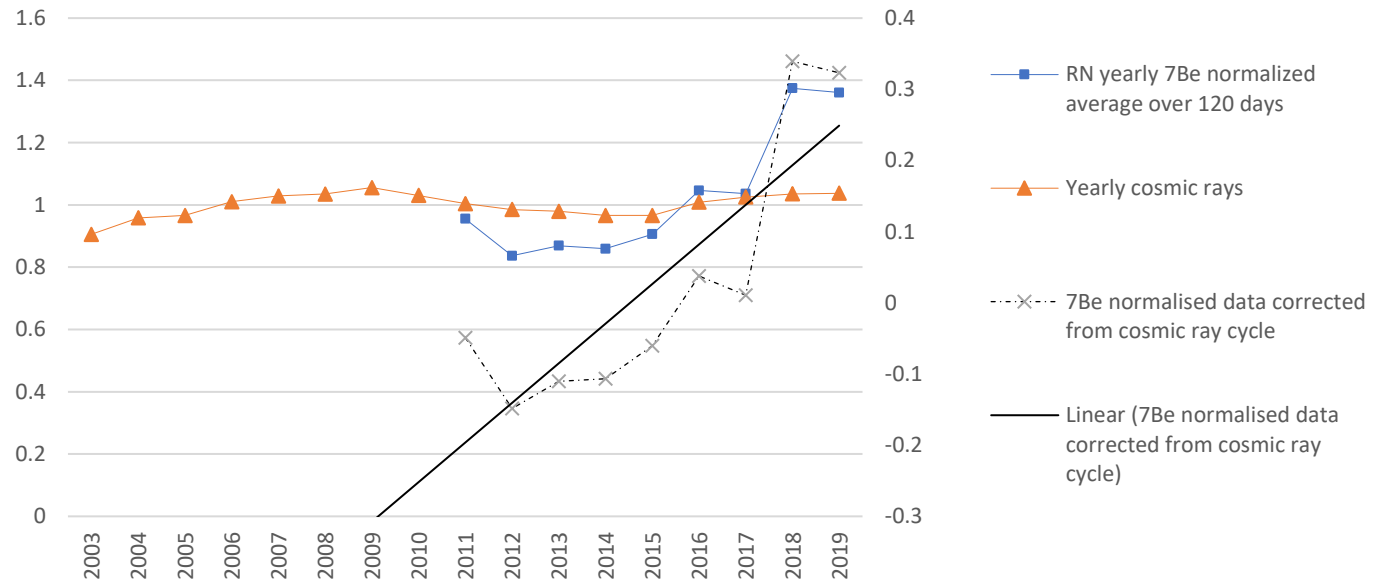

RN monthly <sup>7</sup>Be normalized average over 120 days

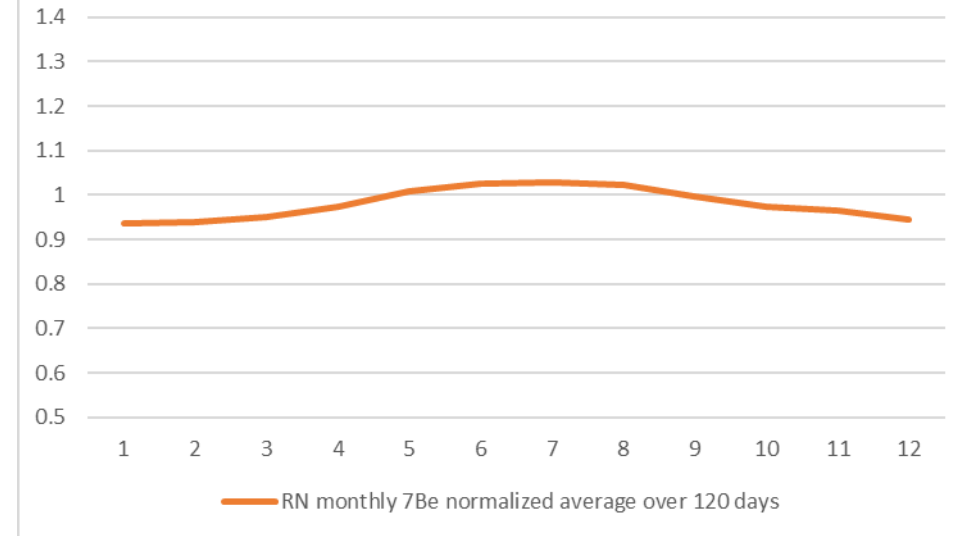

# RN54

### <sup>7</sup>Be data versus cosmic rays

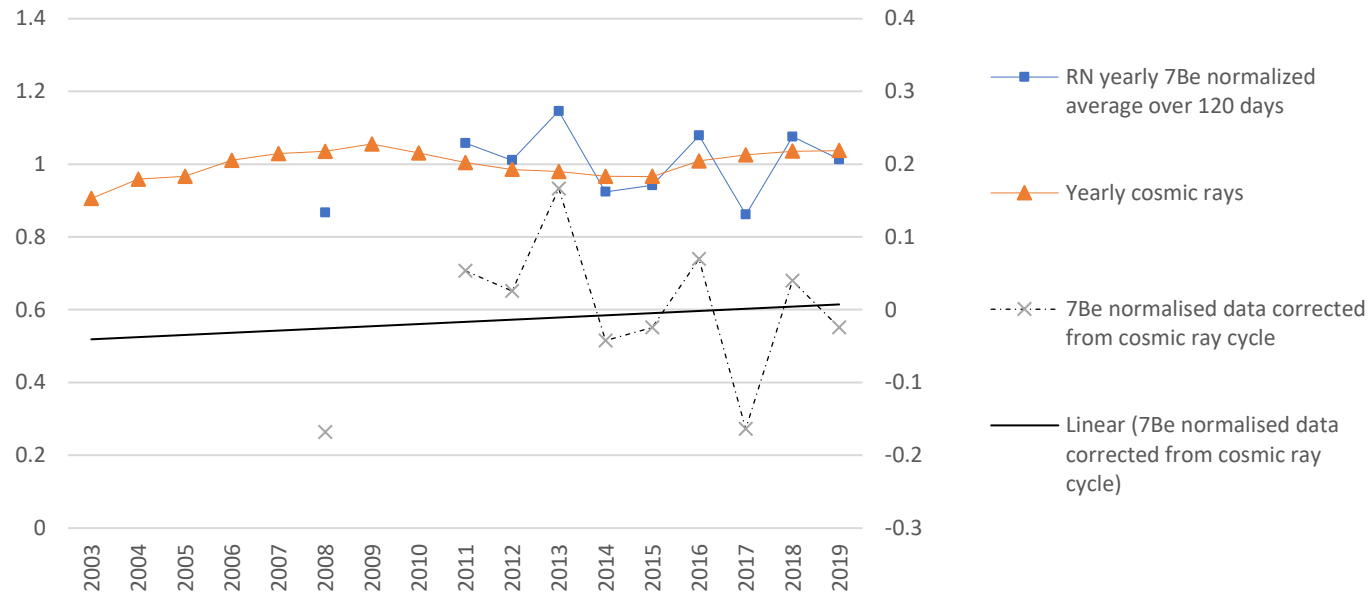

### RN monthly 7Be normalized average over 120 days

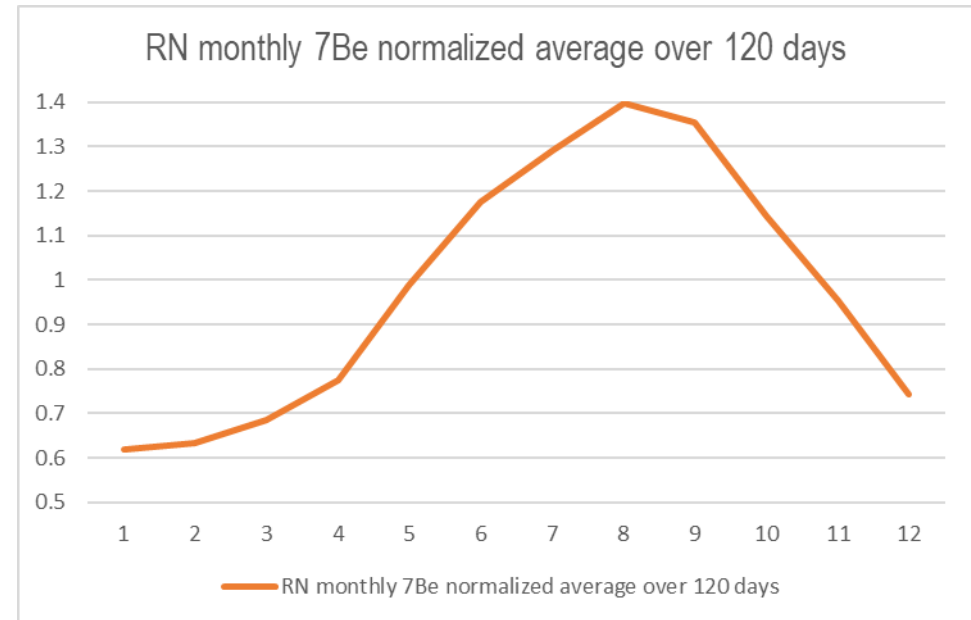

# RN58

$^7\text{Be}$  data versus cosmic rays

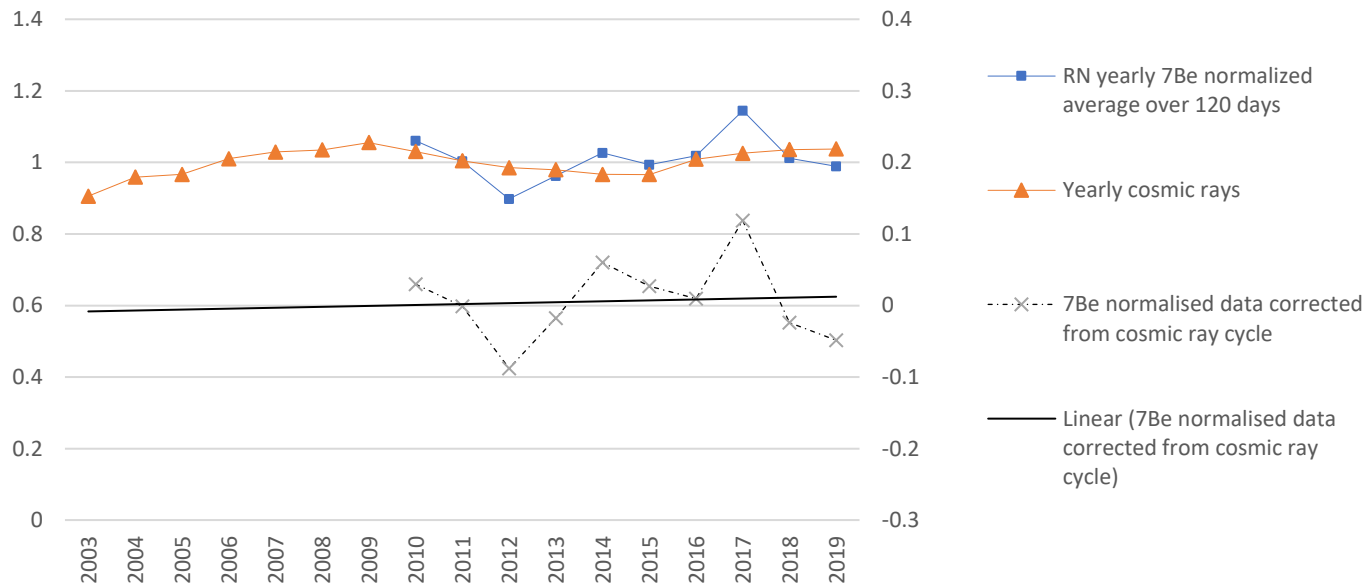

RN monthly  $^7\text{Be}$  normalized average over 120 days

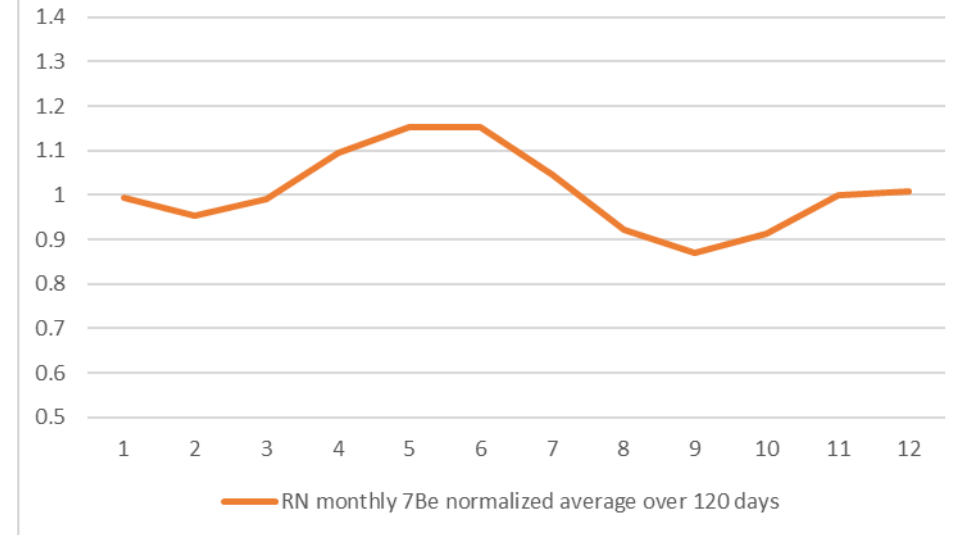

# RN59

### $^7\text{Be}$ data versus cosmic rays

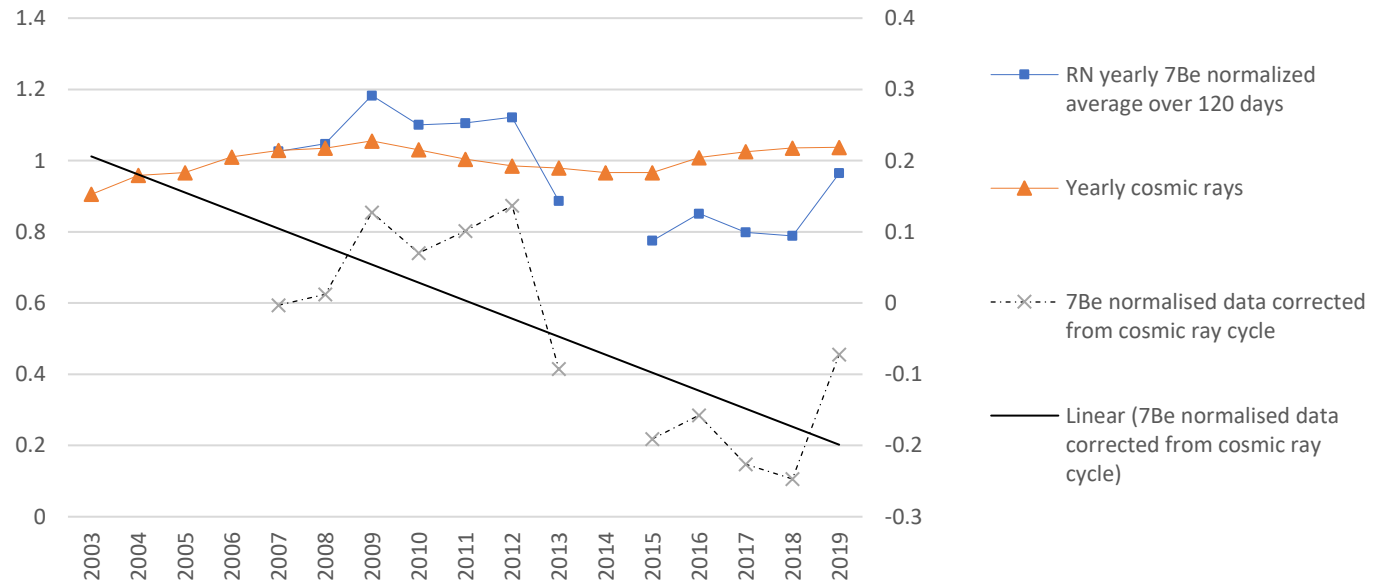

### RN monthly $^7\text{Be}$ normalized average over 120 days

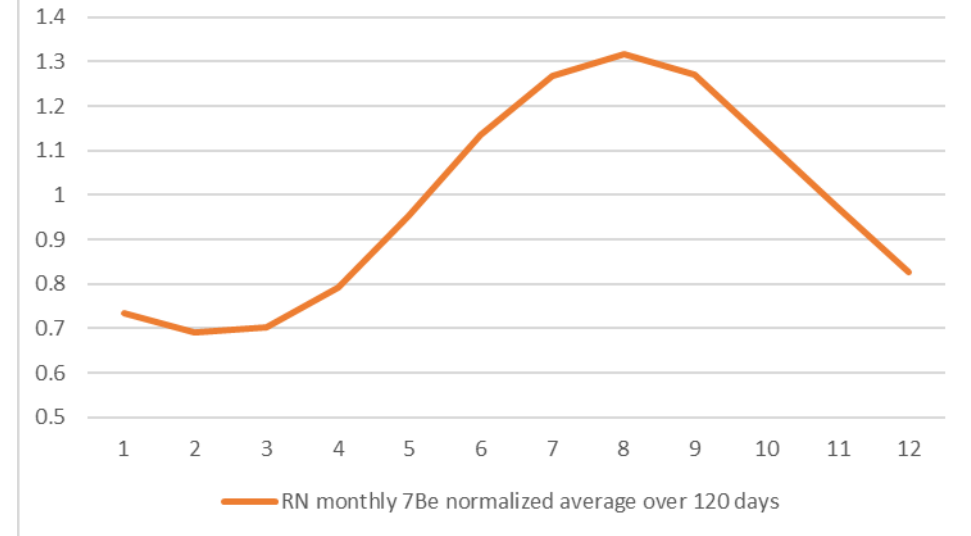

# RN60

### $^7\text{Be}$ data versus cosmic rays

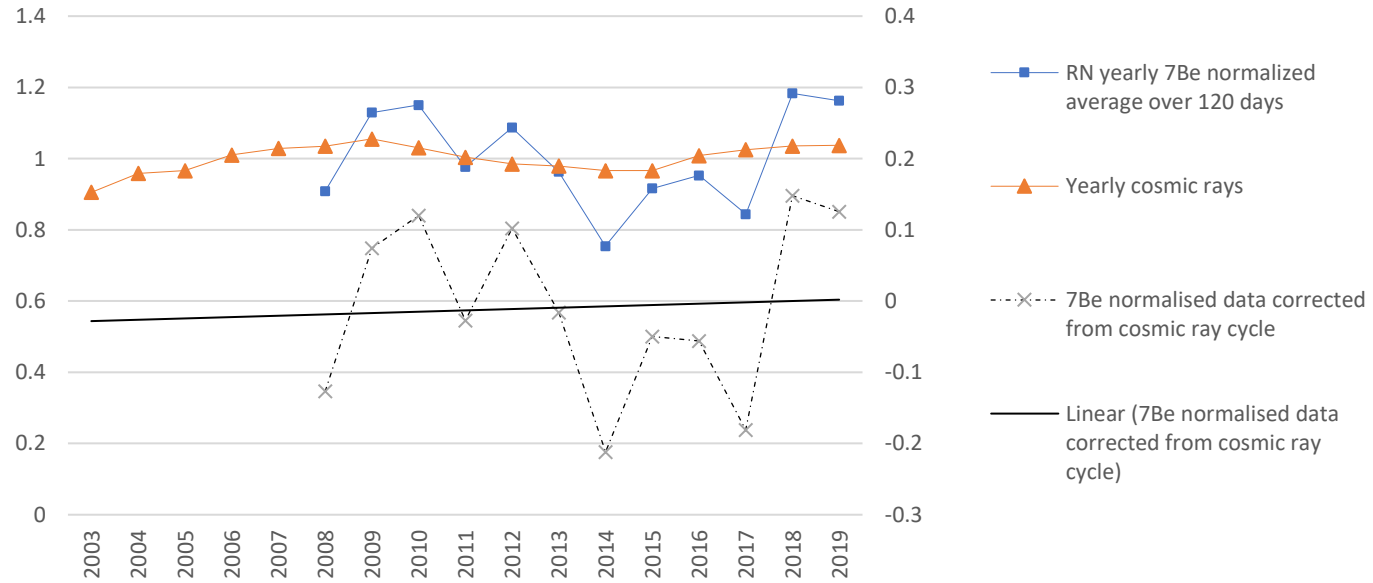

### RN monthly $^7\text{Be}$ normalized average over 120 days

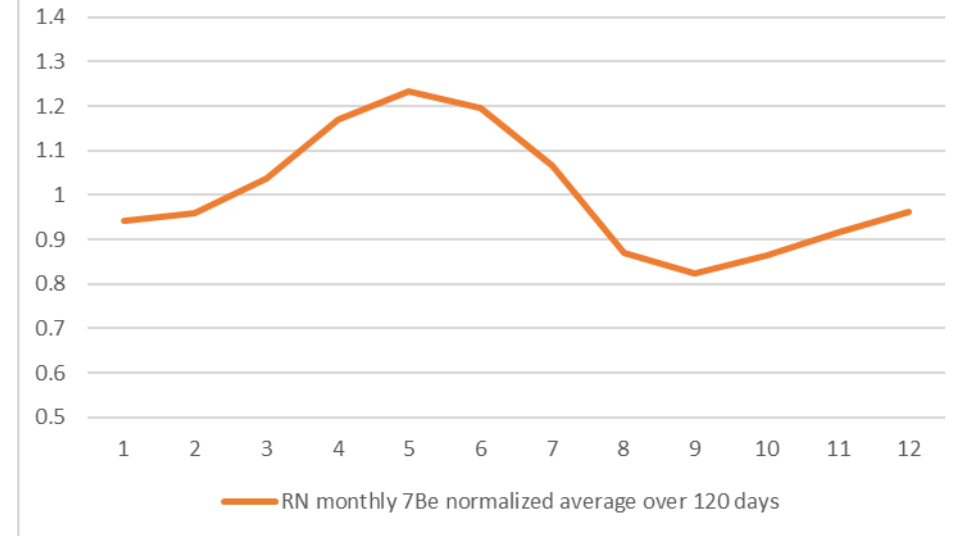

# RN61

$^7\text{Be}$  data versus cosmic rays

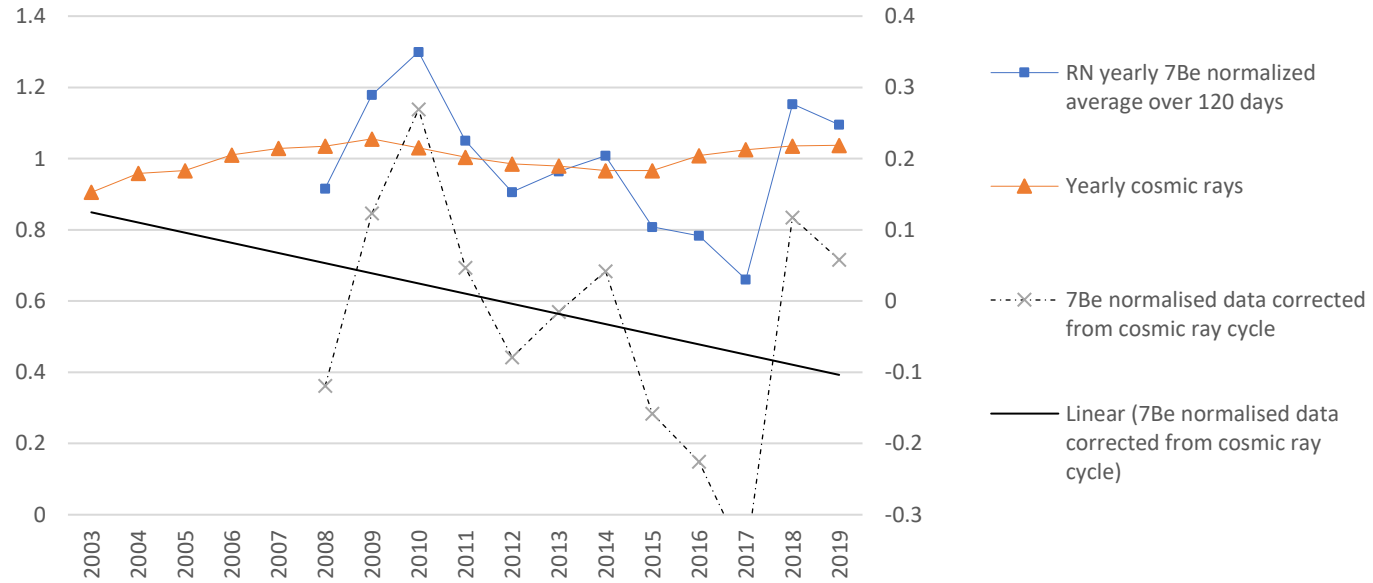

RN monthly  $^7\text{Be}$  normalized average over 120 days

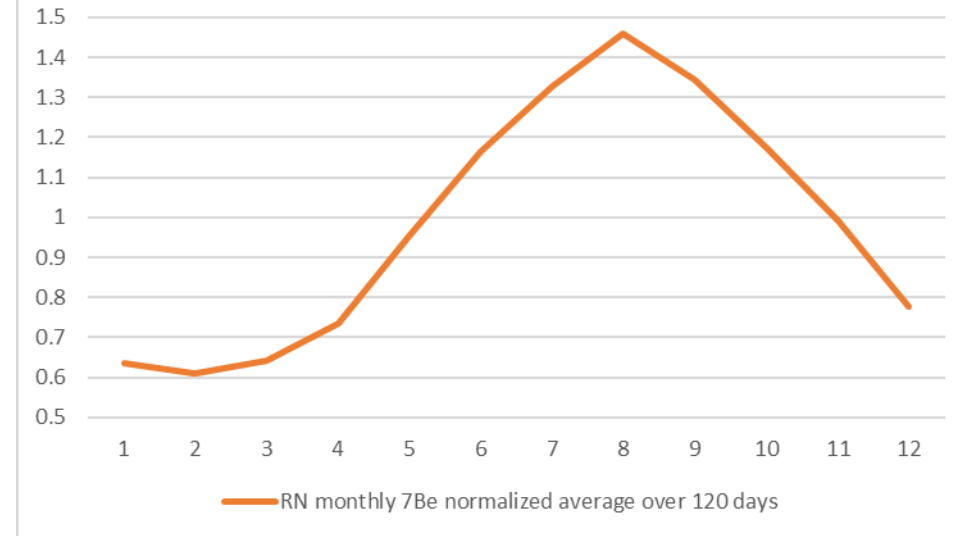

# RN63

### $^7\text{Be}$ data versus cosmic rays

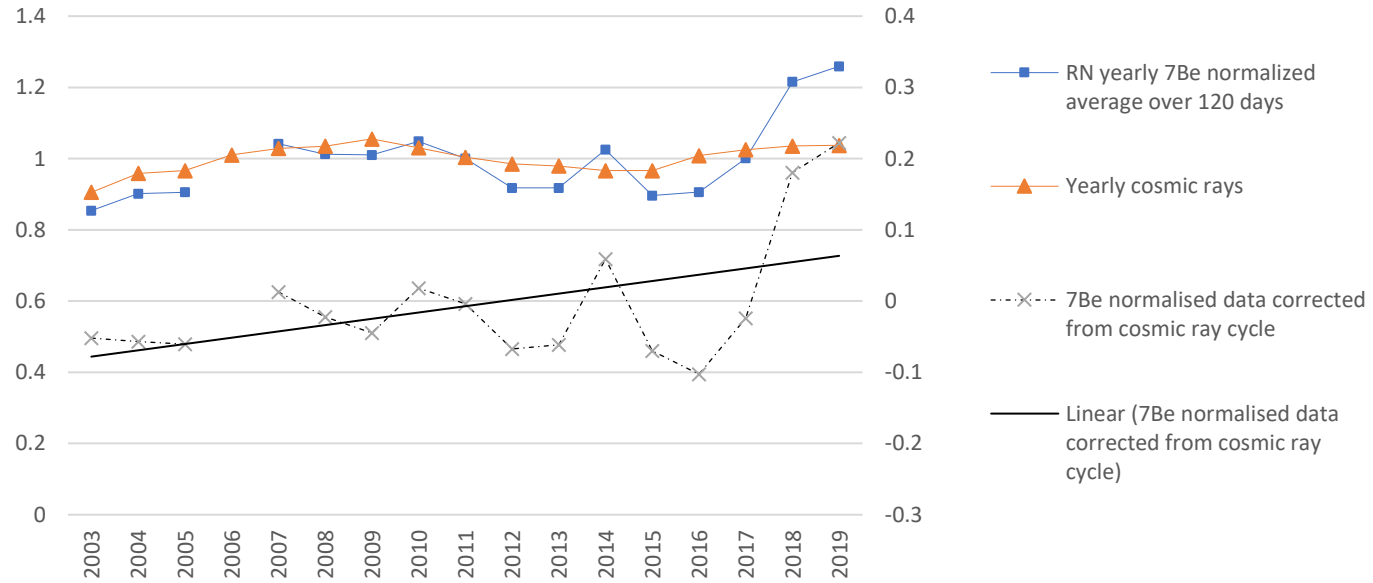

### RN monthly $^7\text{Be}$ normalized average over 120 days

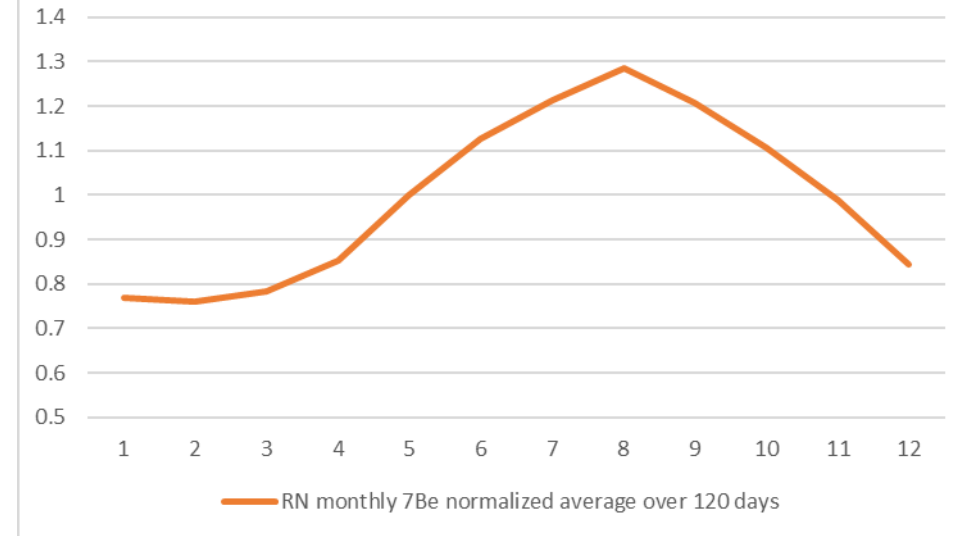



# RN64

$^7\text{Be}$  data versus cosmic rays

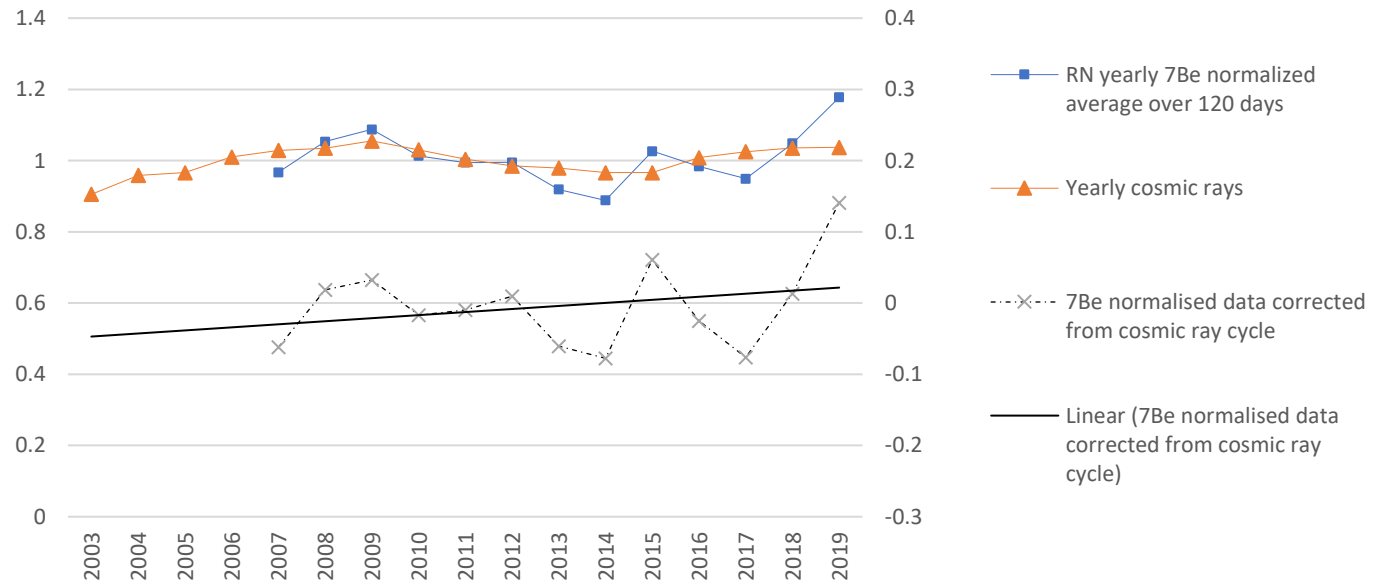

RN monthly  $^7\text{Be}$  normalized average over 120 days

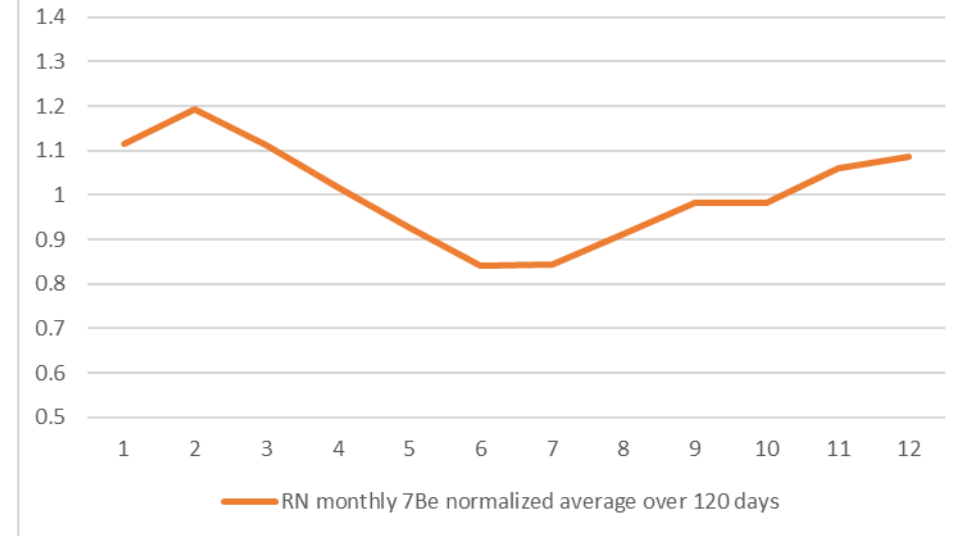

# RN66

$^7\text{Be}$  data versus cosmic rays

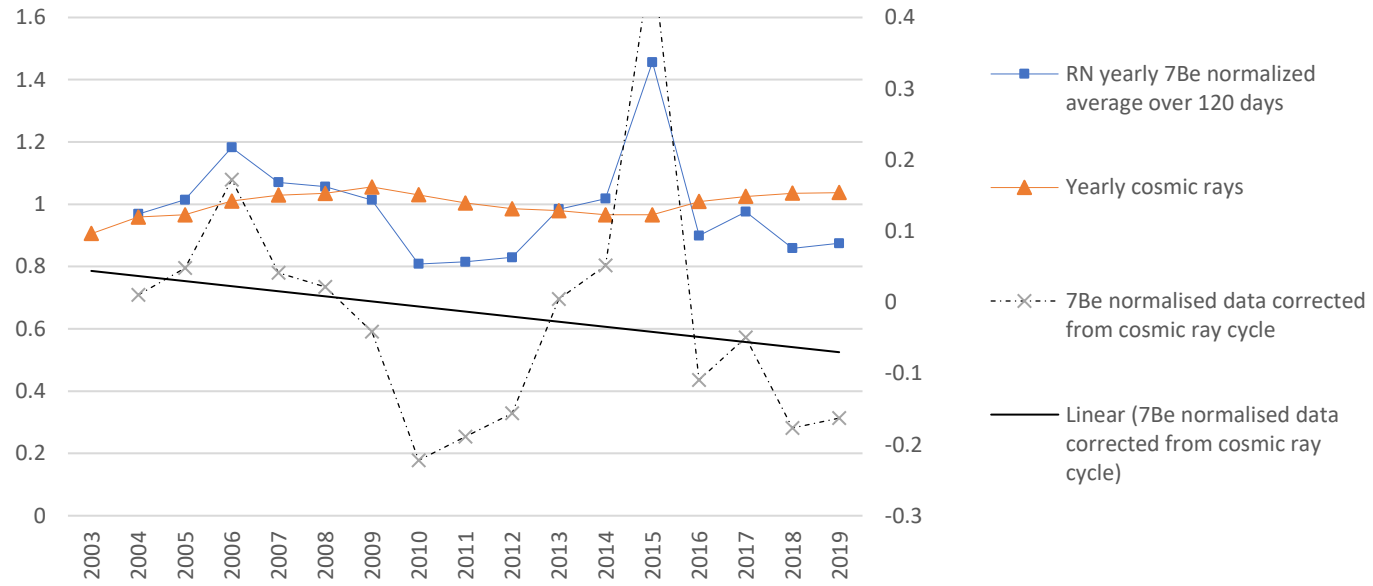

RN monthly  $^7\text{Be}$  normalized average over 120 days

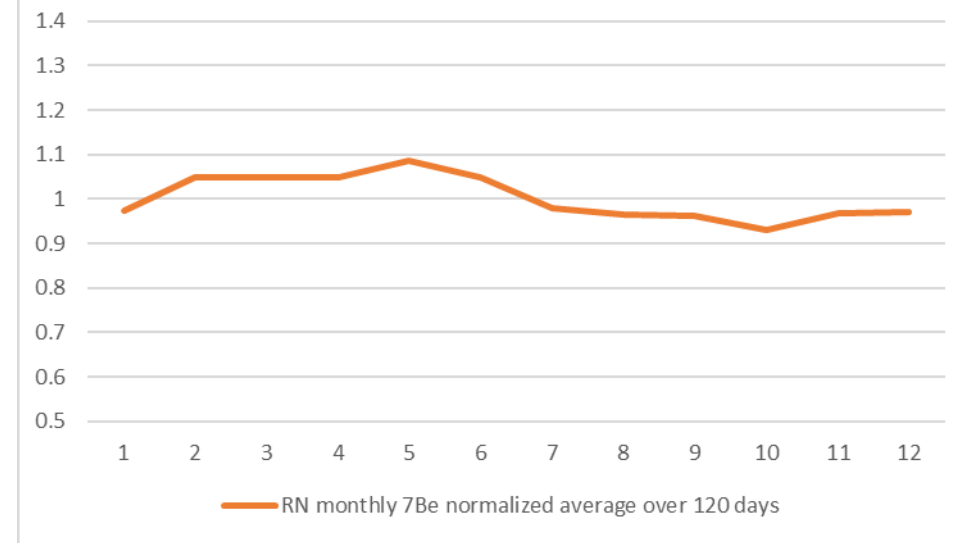

# RN67

### <sup>7</sup>Be data versus cosmic rays

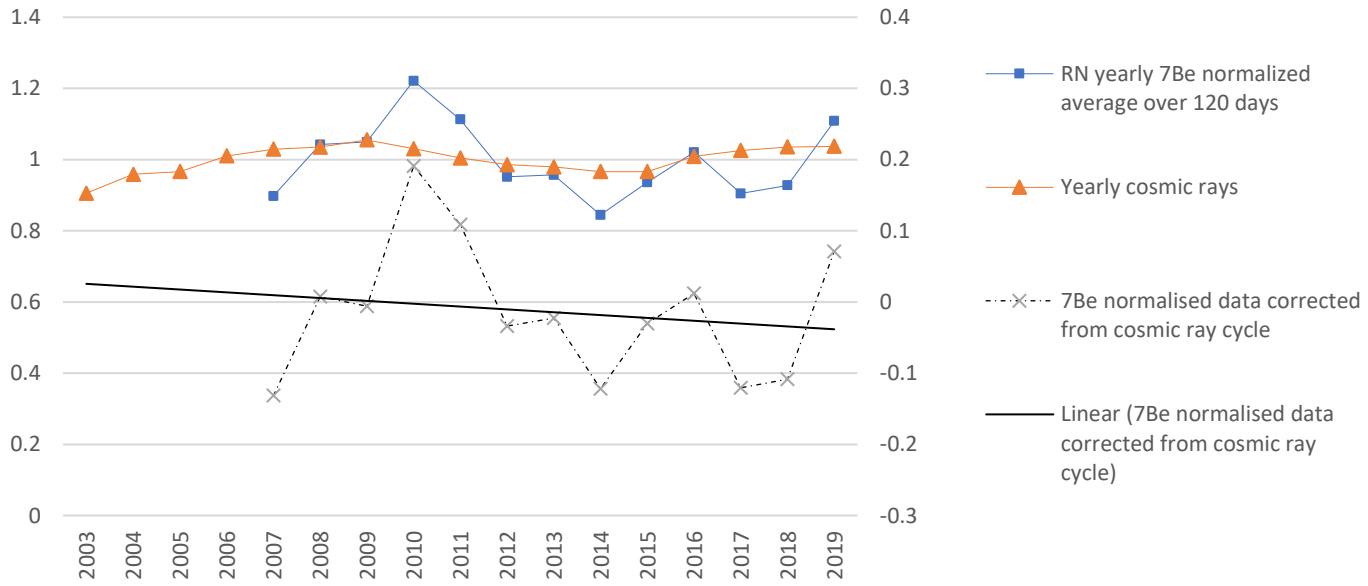

### RN monthly <sup>7</sup>Be normalized average over 120 days

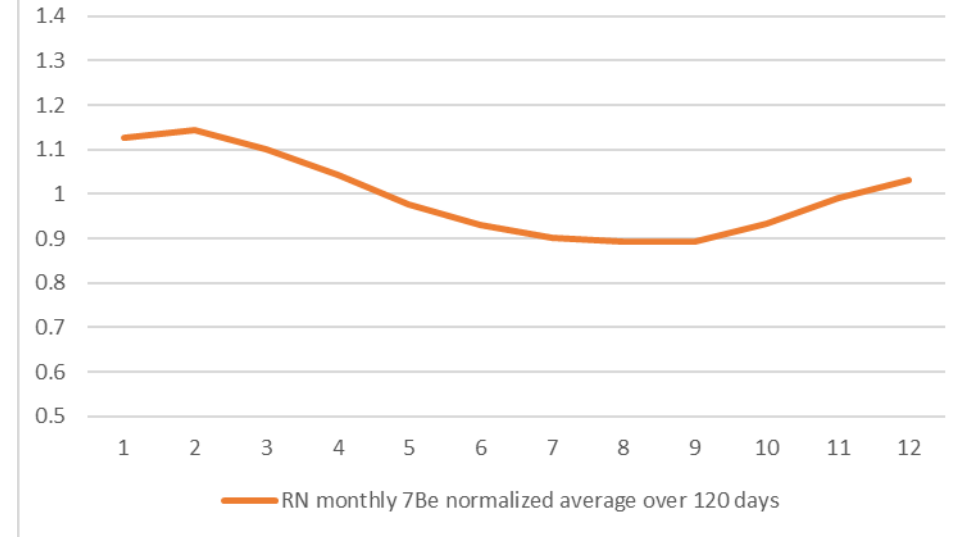

# RN68

$^7\text{Be}$  data versus cosmic rays

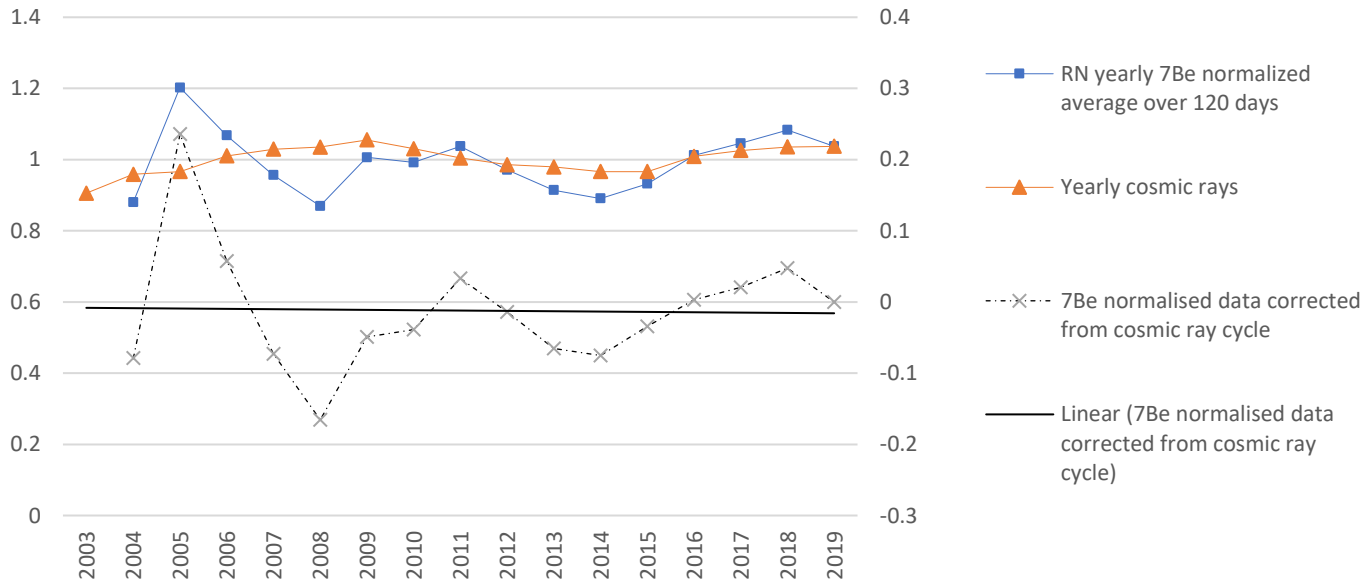

RN monthly  $^7\text{Be}$  normalized average over 120 days

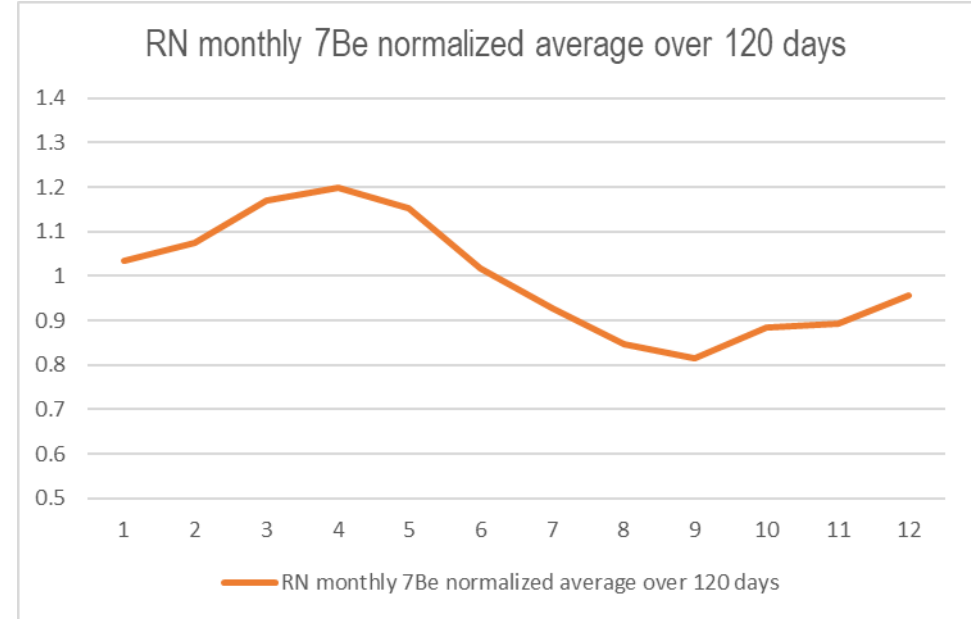

# RN70

$^7\text{Be}$  data versus cosmic rays

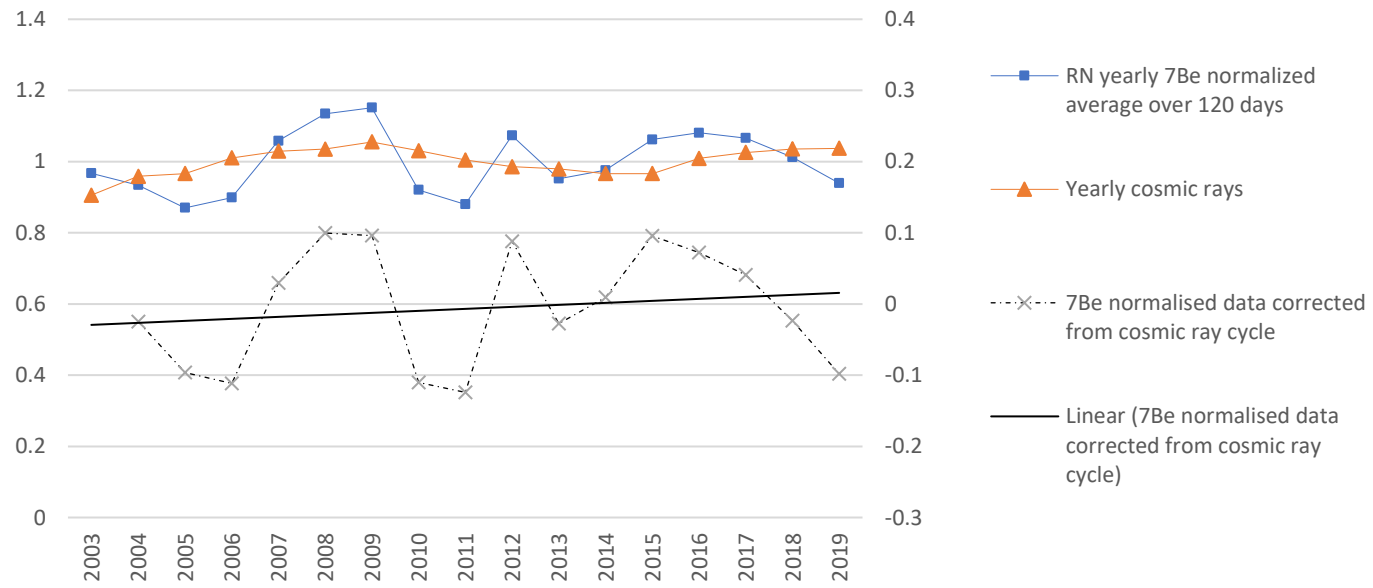

RN monthly  $^7\text{Be}$  normalized average over 120 days

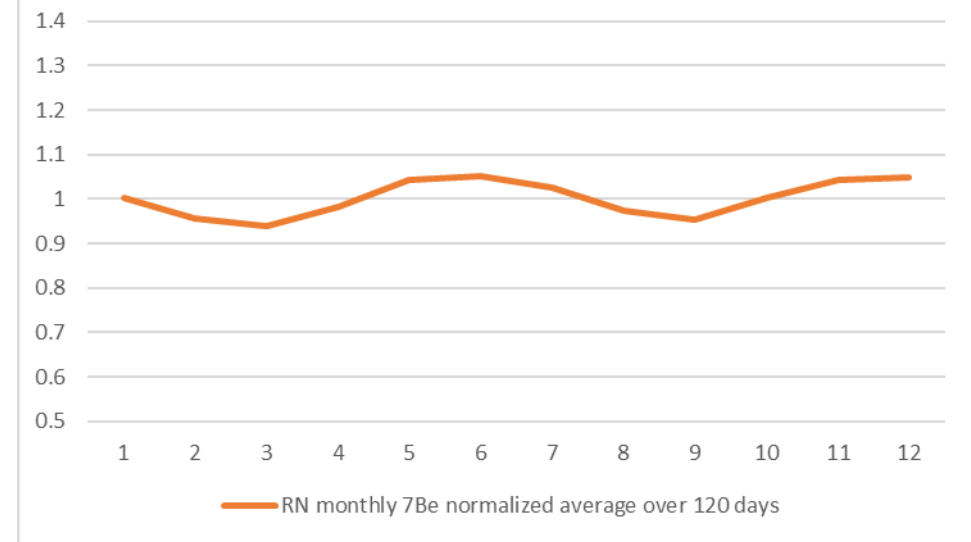

# RN71

<sup>7</sup>Be data versus cosmic rays

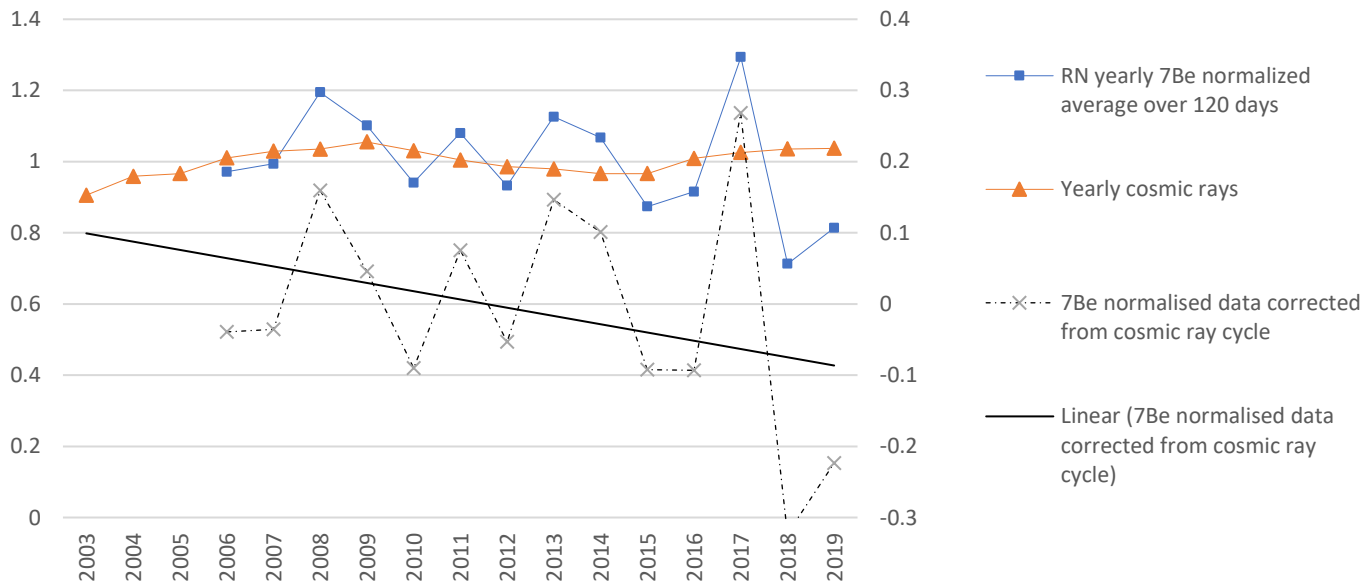

RN monthly <sup>7</sup>Be normalized average over 120 days

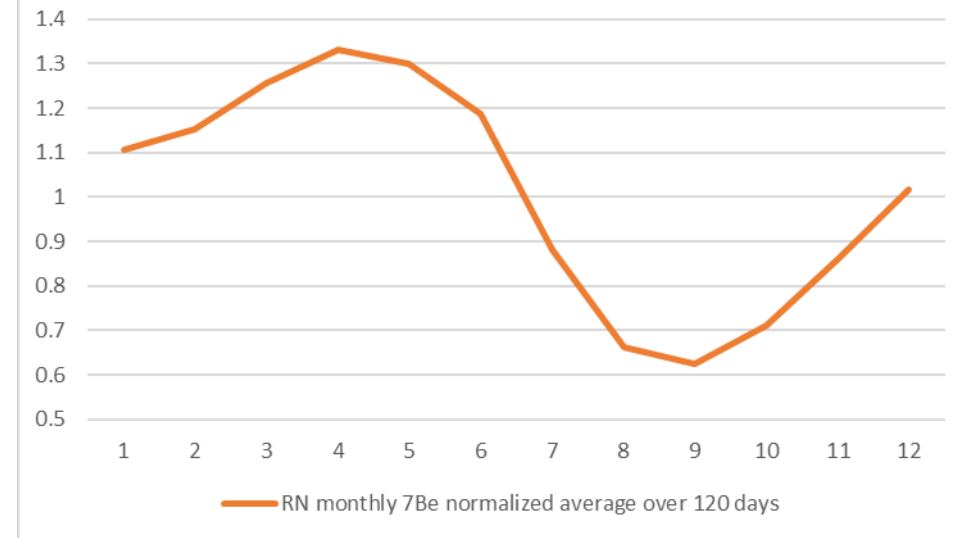

# RN72

$^7\text{Be}$  data versus cosmic rays

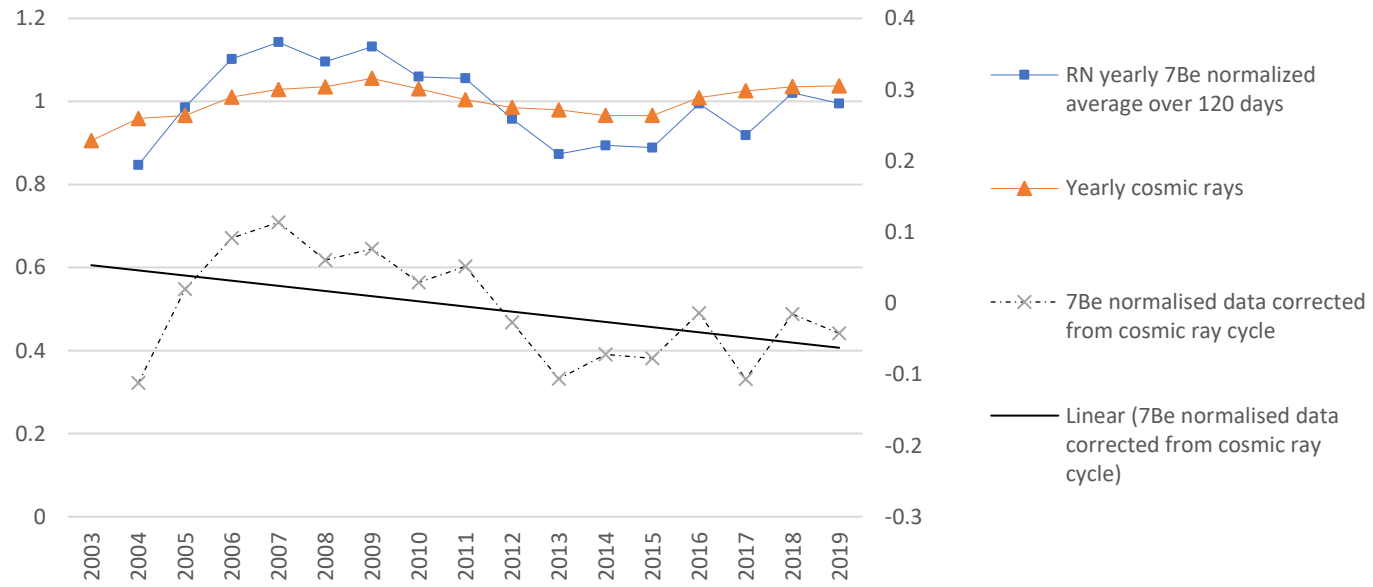

RN monthly  $^7\text{Be}$  normalized average over 120 days

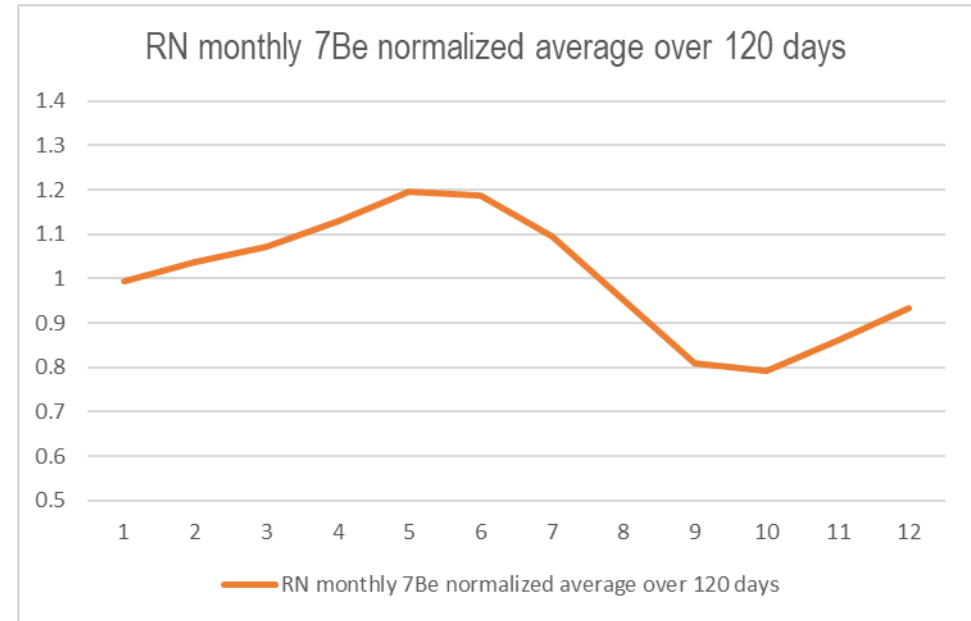

# RN73

### $^7\text{Be}$ data versus cosmic rays

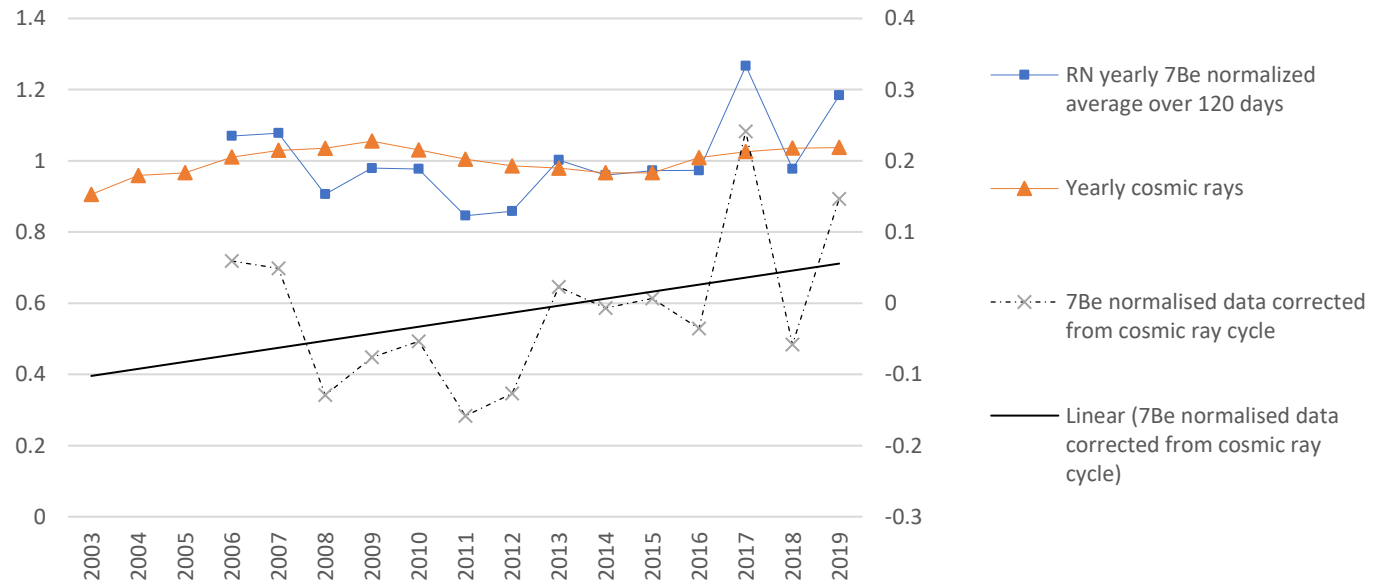

### RN monthly $^7\text{Be}$ normalized average over 120 days

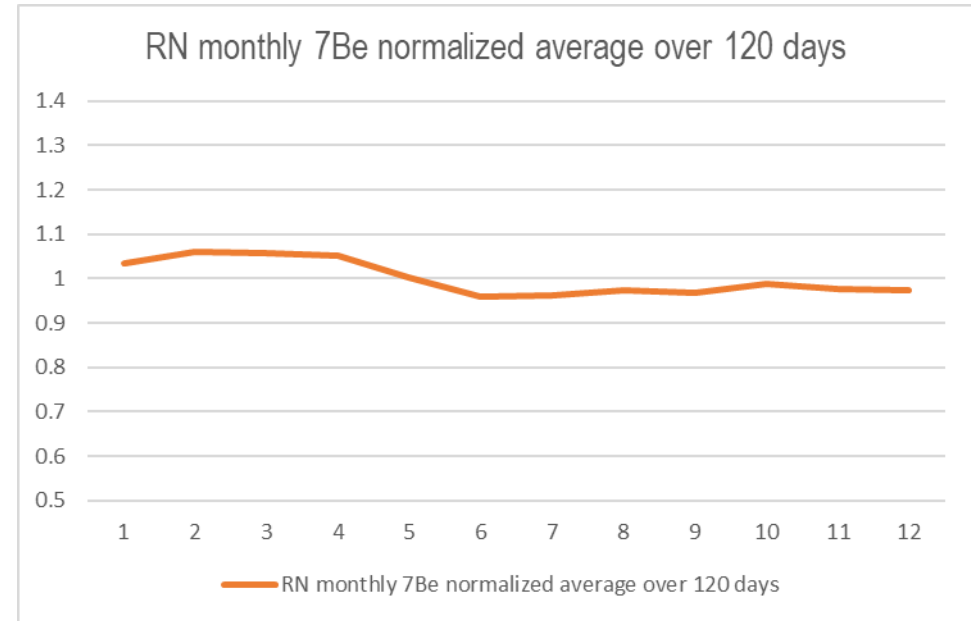



# RN74

$^7\text{Be}$  data versus cosmic rays

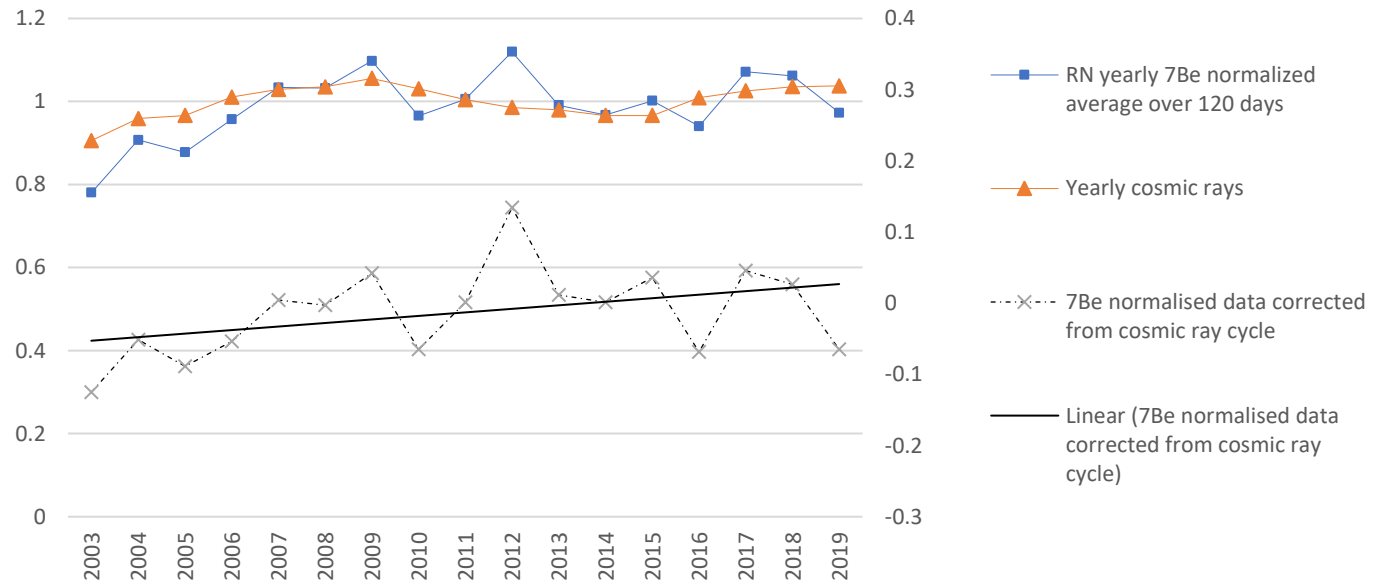

RN monthly  $^7\text{Be}$  normalized average over 120 days

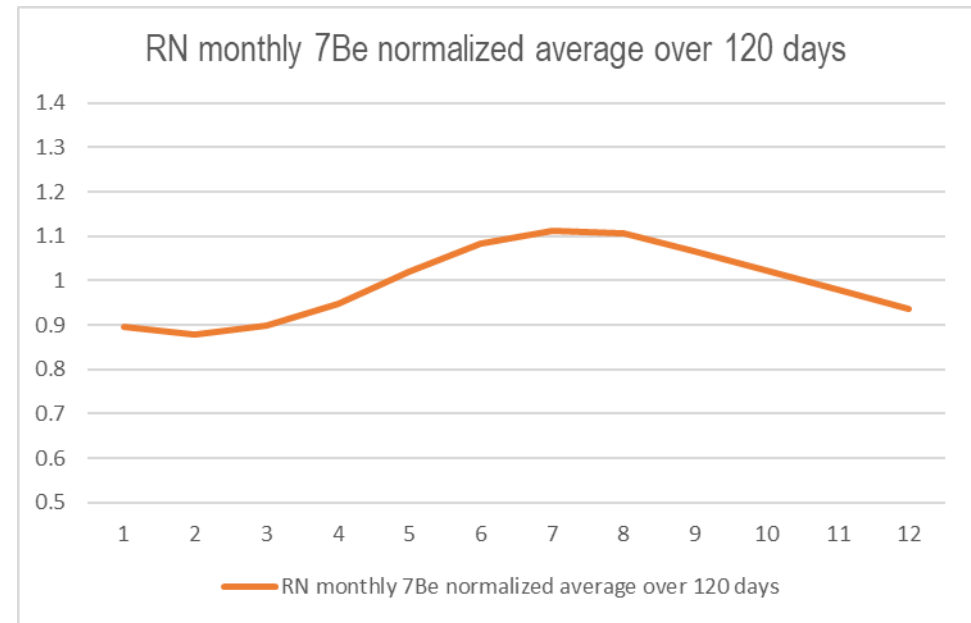

# RN75

### <sup>7</sup>Be data versus cosmic rays

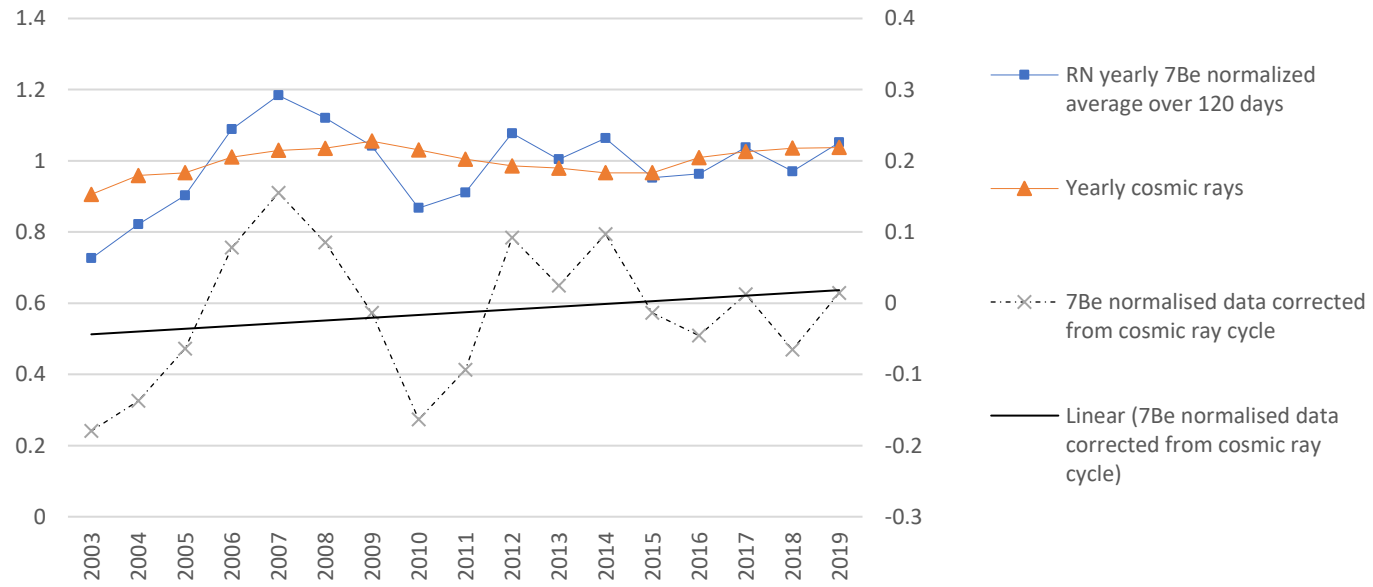

### RN monthly 7Be normalized average over 120 days

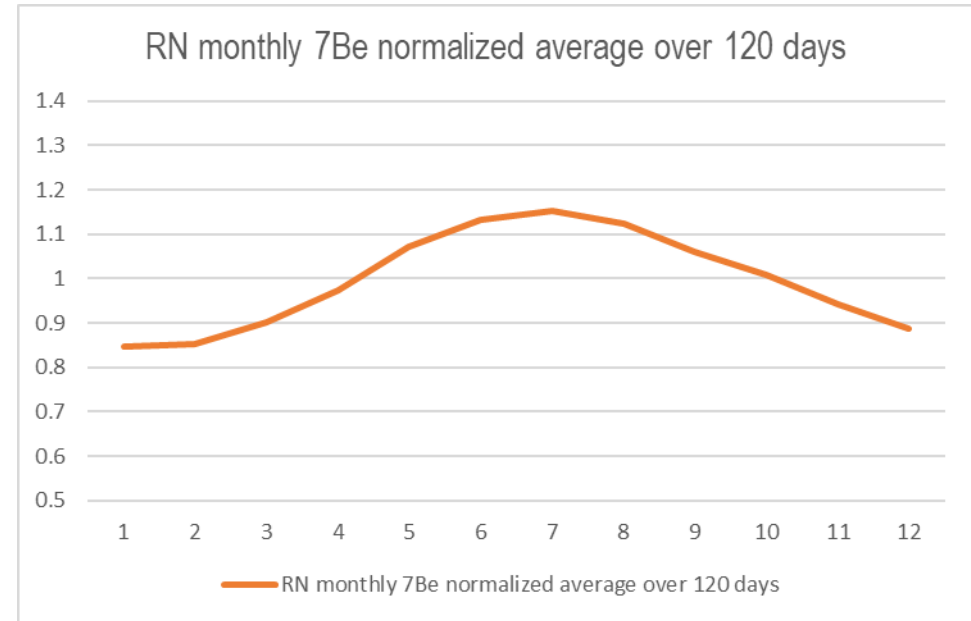

# RN76

$^7\text{Be}$  data versus cosmic rays

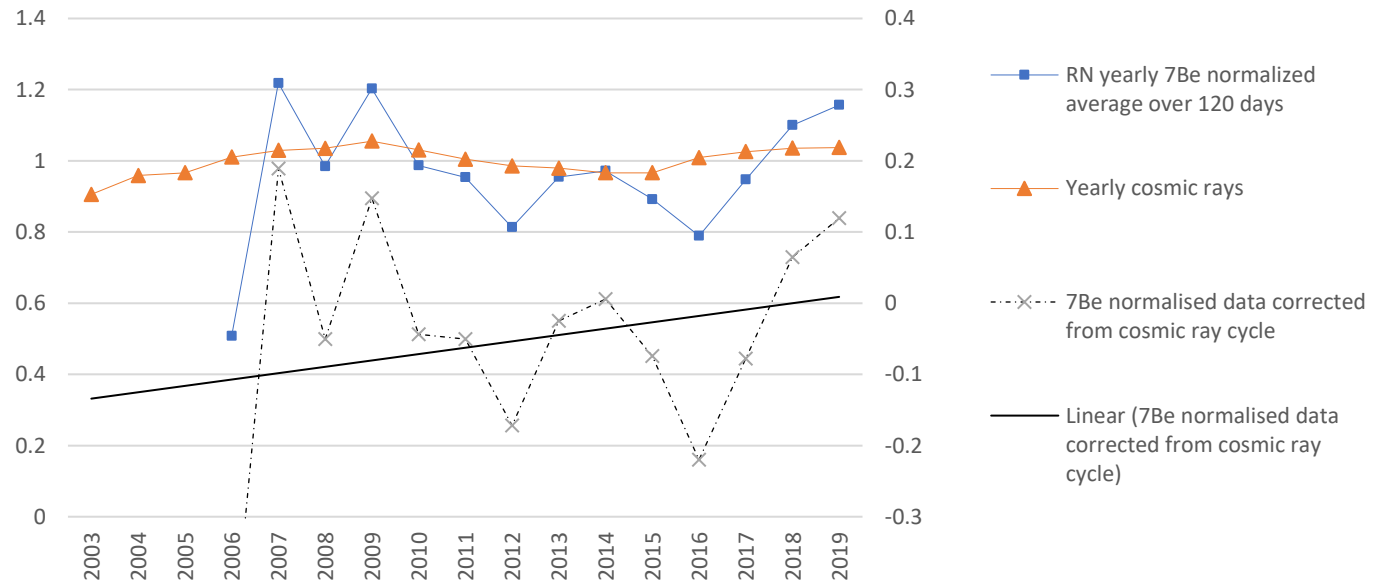

RN monthly  $^7\text{Be}$  normalized average over 120 days

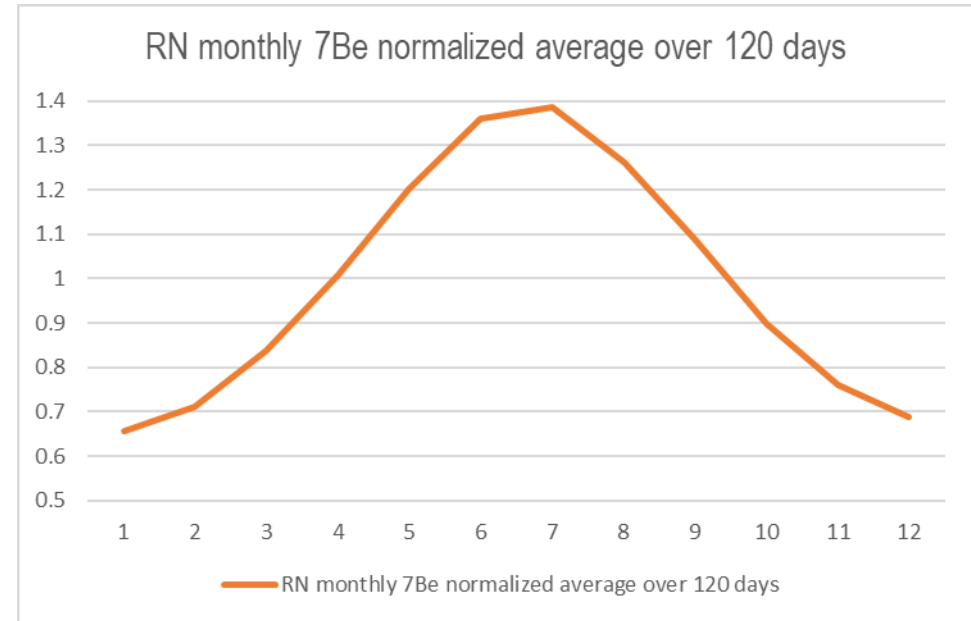

# RN77

$^7\text{Be}$  data versus cosmic rays

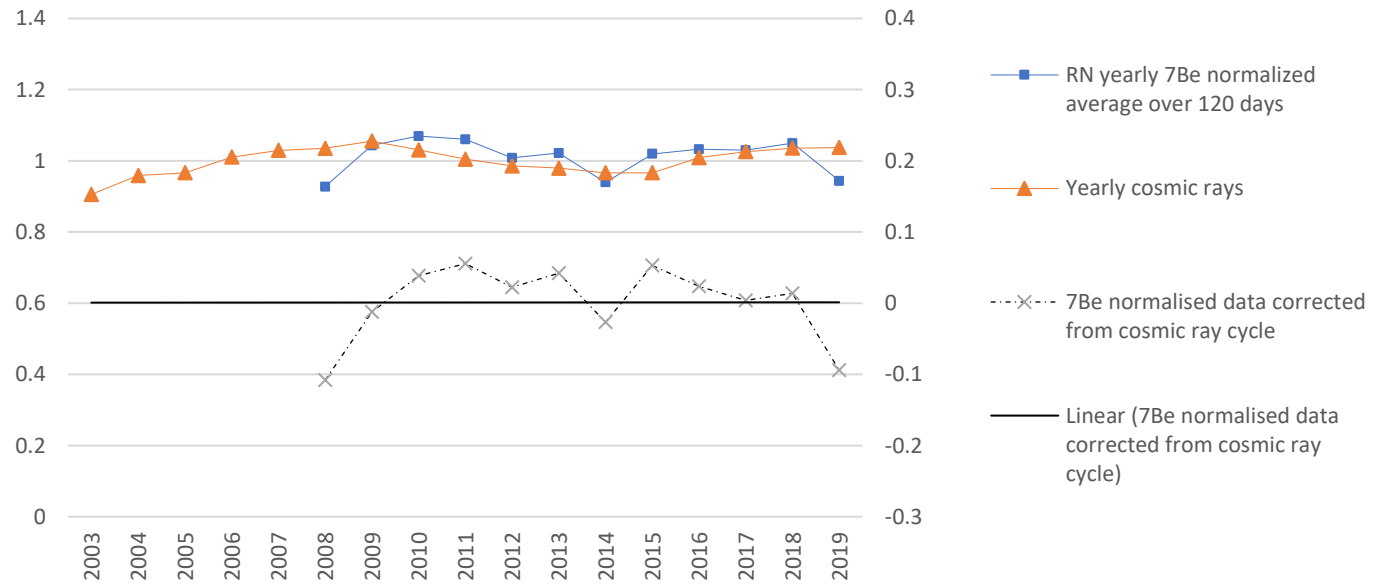

RN monthly  $^7\text{Be}$  normalized average over 120 days

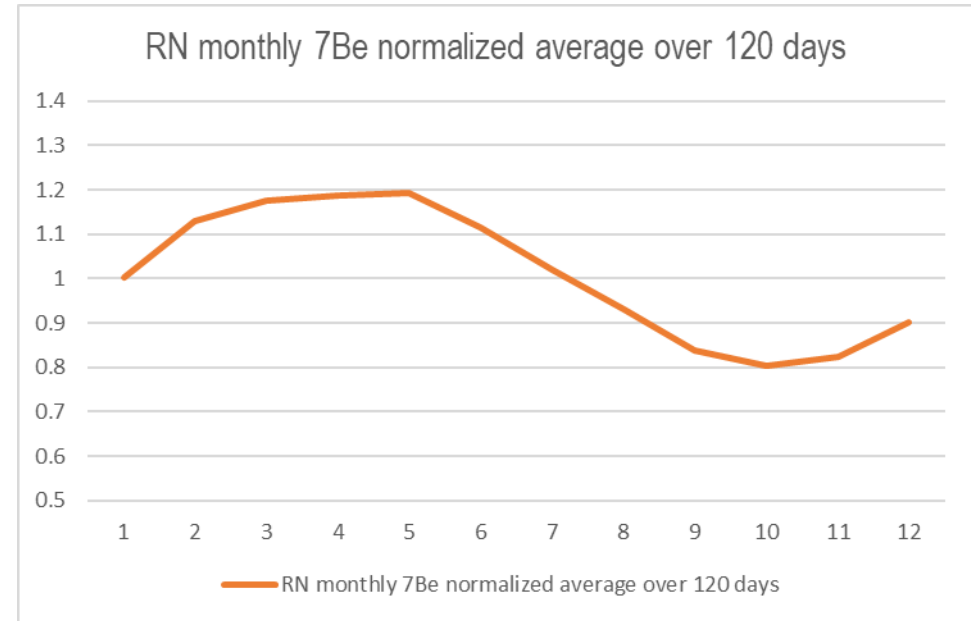

# RN78

$^7\text{Be}$  data versus cosmic rays

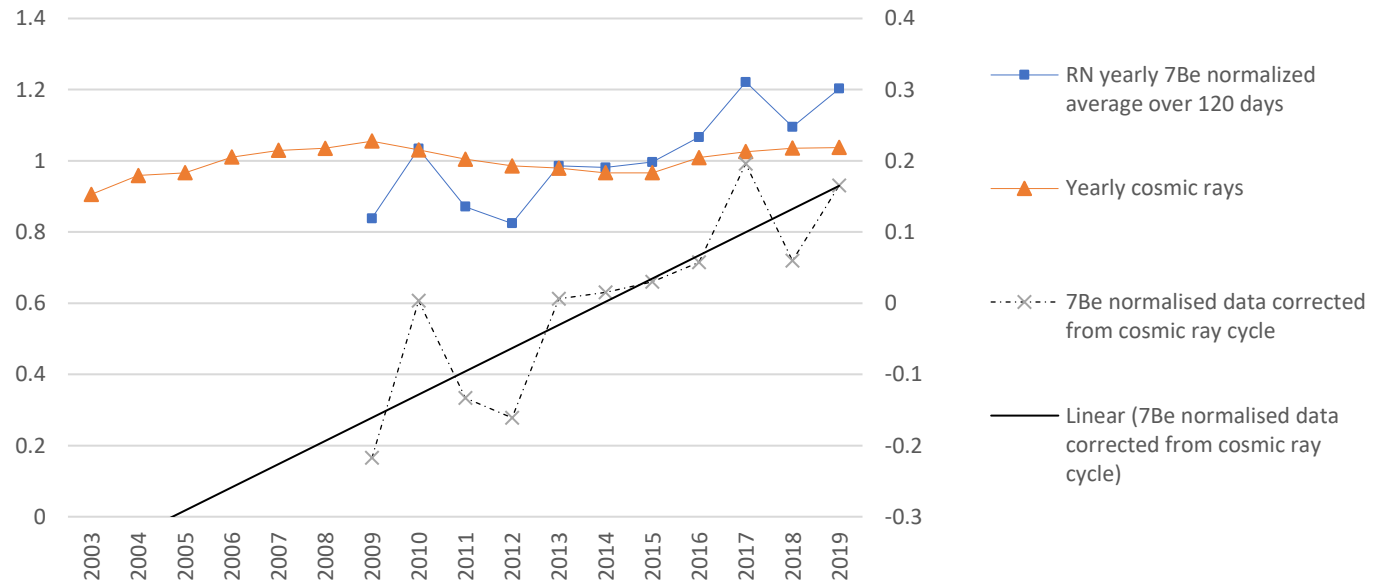

RN monthly  $^7\text{Be}$  normalized average over 120 days

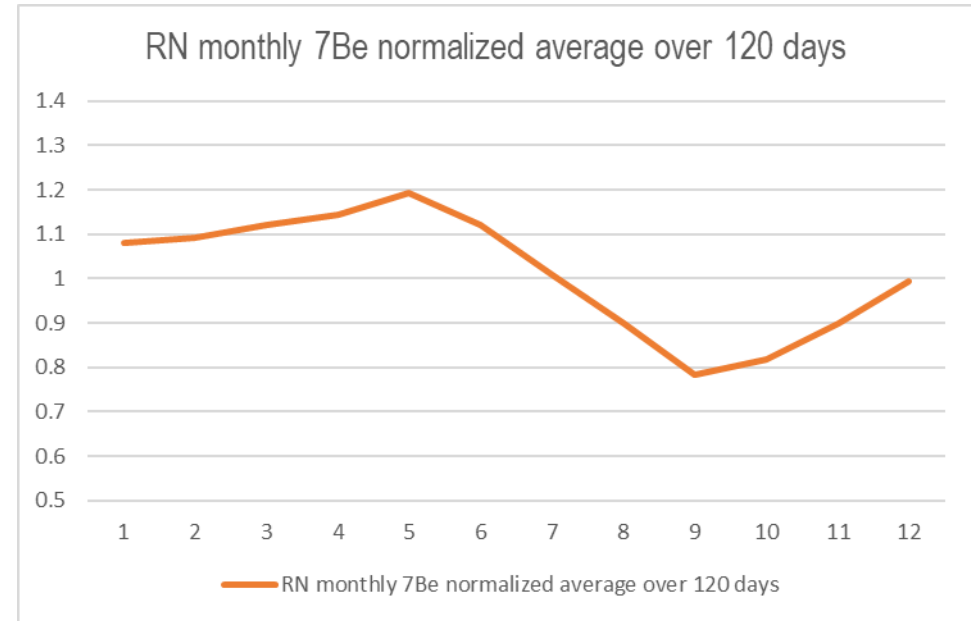

# RN79

### $^7\text{Be}$ data versus cosmic rays

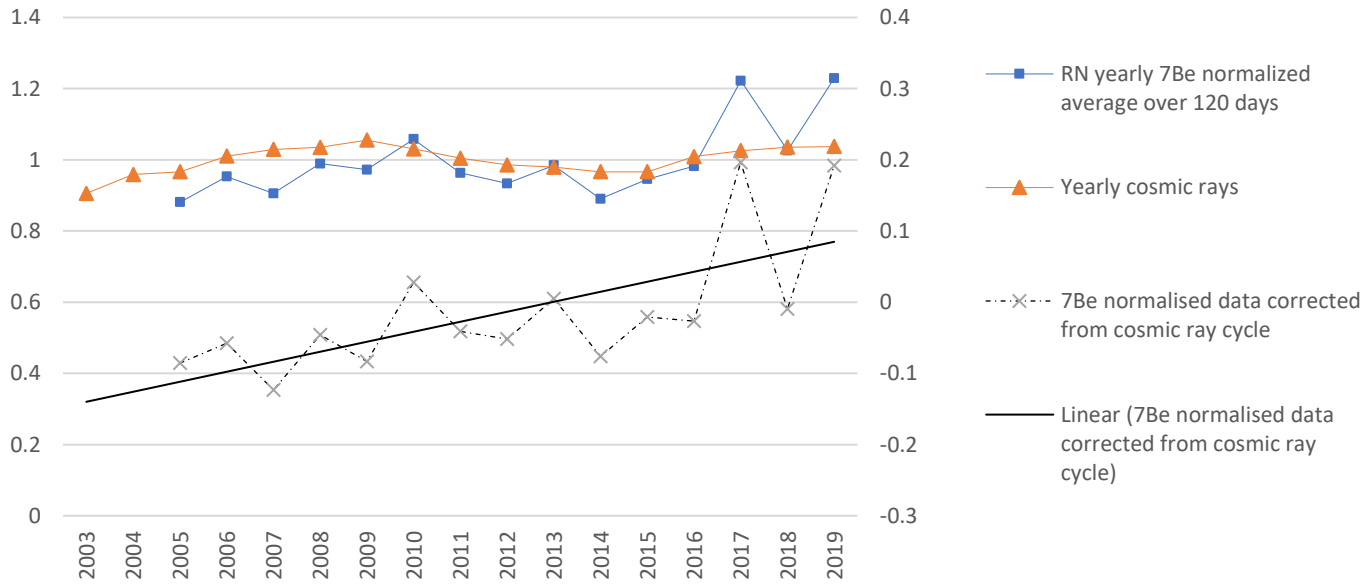

### RN monthly $^7\text{Be}$ normalized average over 120 days

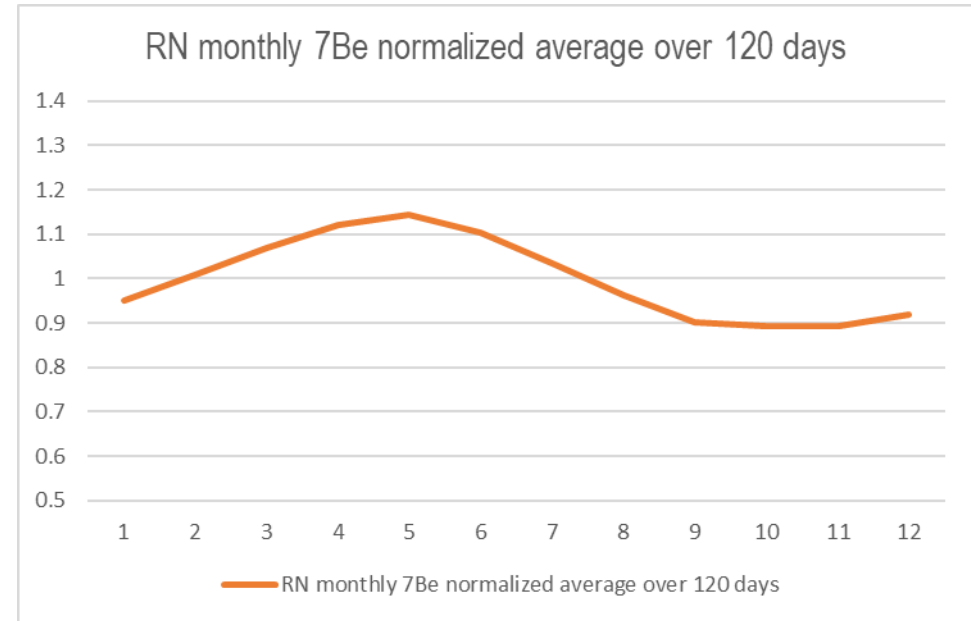

# RN80

### $^7\text{Be}$ data versus cosmic rays

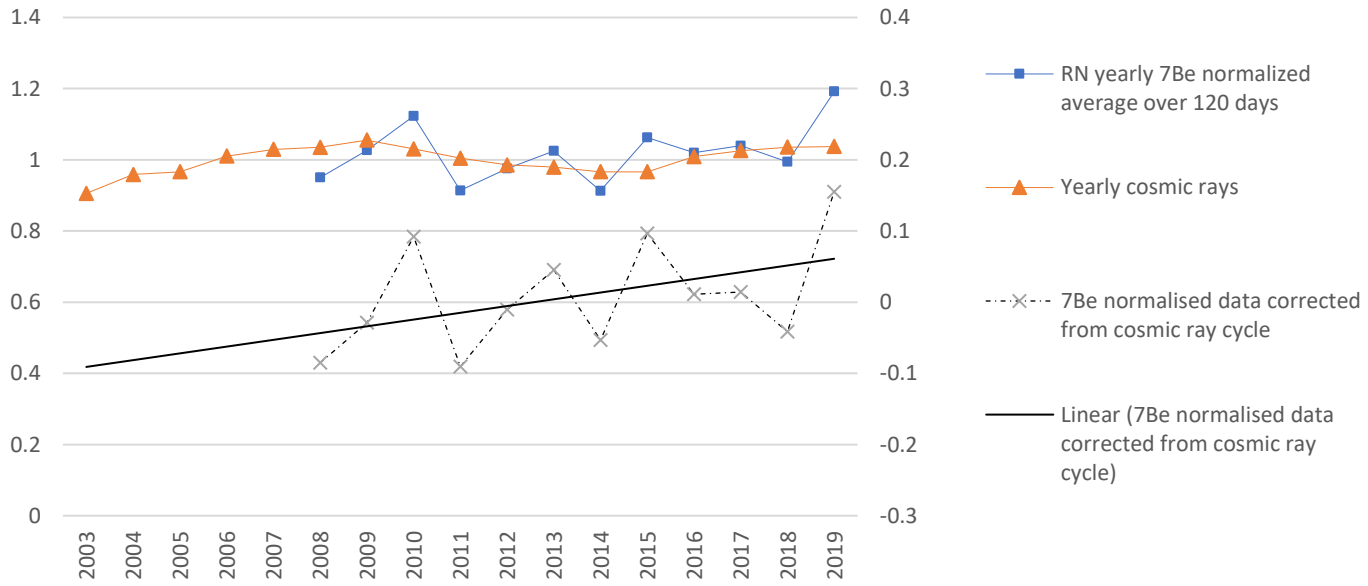

### RN monthly $^7\text{Be}$ normalized average over 120 days

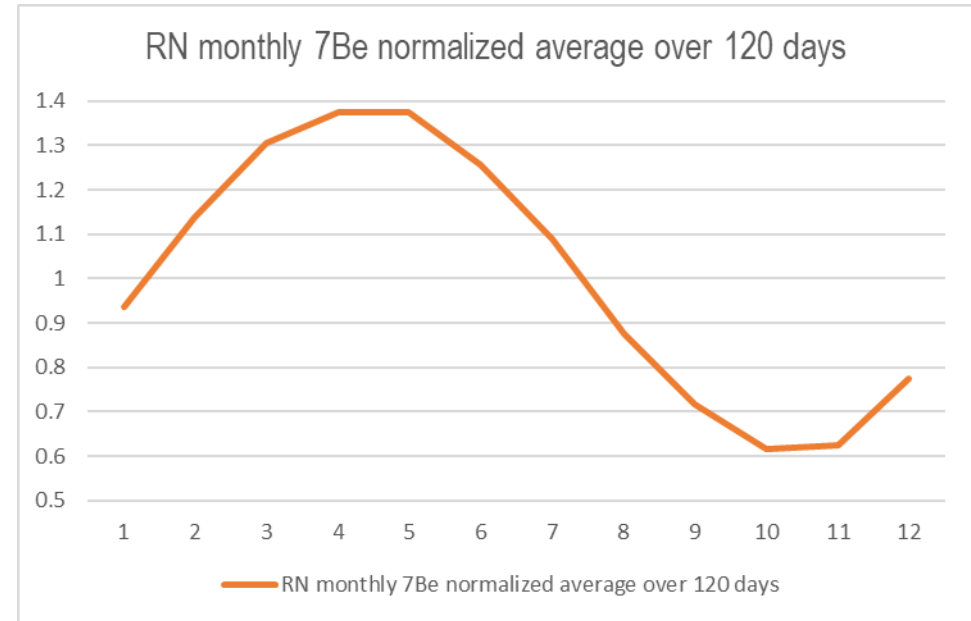

Supplement: 41598_2020_66541_MOESM5_ESM.pdf [file 41598_2020_66541_MOESM5_ESM.pdf]
