# Supplementary material for: Radioisotopes demonstrate changes in global atmospheric circulation possibly caused by global warming
Source: PubMed Central journal article supplement (PMC7329870; doi:10.1038/s41598-020-66541-5), 2020-07-01
Supplement: 41598_2020_66541_MOESM1_ESM.pdf [file 41598_2020_66541_MOESM1_ESM.pdf]

1 **Extended Data**

2

3 **Title: Radioisotopes demonstrate changes in global atmospheric circulation possibly caused by global warming**

4 **Authors:** Lucrezia Terzi<sup>a,b\*</sup>, Gerhard Wotawa<sup>c</sup>, Michael Schoeppner<sup>d,e</sup>, Martin Kalinowski<sup>d</sup>, Paul R.J. Saey<sup>b</sup>, Philipp Steinmann<sup>f</sup>, Lan Luan<sup>g</sup> and Paul W. Staten<sup>g</sup>.

5

6 **Affiliations:** <sup>a</sup>Belgian Nuclear Research Centre (SCK•CEN), Mol, Belgium; <sup>b</sup>Technische Universität Wien, Atominstitut, Austria; <sup>c</sup>Zentralanstalt für Meteorologie und Geodynamik (ZAMG),  
7 Vienna, Austria, <sup>d</sup>Provisional Technical Secretariat, Preparatory Commission for the Nuclear-Test-Ban Treaty Organization, International Data Centre, Vienna, Austria; <sup>e</sup>Institute of  
8 Safety/Security and Risk Sciences, Vienna, Austria; <sup>f</sup>Federal Office of Public Health (BAG), Bern, Switzerland; <sup>g</sup>Indiana University Bloomington, Bloomington, Indiana, USA.

9

10 **\*Corresponding Author:**

11 Lucrezia Terzi

12 Ph: +43 6644553833

13 e-mail: lucrezia.terzi@sckcen.be

14 <sup>a</sup> SCK•CEN, Belgium Nuclear Research Centre,  
15 Boeretang 200, 2400 Mol, Belgium.

16 <sup>b</sup> Technische Universität Wien, Atominstitut,  
17 Stadionallee 2, 1020 Wien, Austria.

18

19 **Supplementary Tables**

20

21 **Table S1. International Monitoring System Stations (www.CTBTO.org)**

22

23

A

|                                                                                                                                                                        |        |
|------------------------------------------------------------------------------------------------------------------------------------------------------------------------|--------|
| Total n. of stations                                                                                                                                                   | 62     |
| Total n. of samples                                                                                                                                                    | 268752 |
| Average timeseries length (n. of years)                                                                                                                                | 12     |
| Minimum timeseries length (n. of years)                                                                                                                                | 7      |
| Maximum timeseries length (n. of years)                                                                                                                                | 16     |
| Outliers filtered out (single spikes above factor of 2 over overall average). Filtered data averaged over 0/-120 days and normalized over overall average (2003-2019). |        |

24

25

B

| Station code | Treaty number | State        | Location                     | Latitude | Longitude | N. of samples from 2003-2019 (5967 days) |
|--------------|---------------|--------------|------------------------------|----------|-----------|------------------------------------------|
| ARP01        | RN01          | Argentina    | Buenos Aires                 | -34.54   | -58.47    | 5784                                     |
| ARP03        | RN03          | Argentina    | Bariloche                    | -41.15   | -71.16    | 4563                                     |
| AUP04        | RN04          | Australia    | Melbourne, VIC               | -37.73   | 145.10    | 5776                                     |
| AUP05        | RN05          | Australia    | Mawson, Antarctica           | -67.60   | 62.87     | 2387                                     |
| AUP06        | RN06          | Australia    | Townsville, QLD              | -19.25   | 146.77    | 5476                                     |
| AUP07        | RN07          | Australia    | Macquarie Island             | -54.50   | 158.95    | 2673                                     |
| AUP08        | RN08          | Australia    | Cocos Islands                | -12.19   | 96.83     | 5342                                     |
| AUP09        | RN09          | Australia    | Darwin, NT                   | -12.43   | 130.89    | 5291                                     |
| AUP10        | RN10          | Australia    | Perth, WA                    | -31.93   | 115.98    | 5410                                     |
| BRP11        | RN11          | Brazil       | Rio de Janeiro               | -22.99   | -43.42    | 5405                                     |
| CMP13        | RN13          | Cameroon     | Edea                         | 3.78     | 10.15     | 3450                                     |
| CAP14        | RN14          | Canada       | Sidney                       | 48.65    | -123.45   | 3381                                     |
| CAP15        | RN15          | Canada       | Resolute, NU                 | 74.71    | -94.97    | 4089                                     |
| CAP16        | RN16          | Canada       | Yellowknife, N.W.T.          | 62.48    | -114.47   | 5668                                     |
| CAP17        | RN17          | Canada       | St. John's N.L.              | 47.59    | -52.74    | 4592                                     |
| CLP18        | RN18          | Chile        | Punta Arenas                 | -53.14   | -70.88    | 4685                                     |
| CLP19        | RN19          | Chile        | Hanga Roa, Easter Island     | -27.13   | -109.35   | 3582                                     |
| CKP23        | RN23          | Cook Islands | Rarotonga                    | -21.20   | -159.81   | 5467                                     |
| FJP26        | RN26          | Fiji         | Nadi                         | -17.76   | 177.45    | 4775                                     |
| FRP27        | RN27          | France       | Papeete, Tahiti              | -17.57   | -149.57   | 4410                                     |
| FRP28        | RN28          | France       | Pointe-à-Pitre, Guadeloupe   | 16.26    | -61.53    | 3844                                     |
| FRP29        | RN29          | France       | Réunion                      | -20.91   | 55.59     | 4575                                     |
| FRP30        | RN30          | France       | Port-aux-Français, Kerguelen | -49.35   | 70.26     | 4170                                     |
| FRP31        | RN31          | France       | Kourou, French Guiana        | 5.17     | -52.69    | 4453                                     |
| DEP33        | RN33          | Germany      | Schauinsland/Freiburg        | 47.92    | 7.91      | 4144                                     |
| ISP34        | RN34          | Iceland      | Reykjavik                    | 64.13    | -21.90    | 4185                                     |
| JPP37        | RN37          | Japan        | Okinawa                      | 26.50    | 127.90    | 4342                                     |
| JPP38        | RN38          | Japan        | Takasaki, Gunma              | 36.30    | 139.08    | 4683                                     |
| KIP39        | RN39          | Kiribati     | Kiritimati                   | 2.01     | -157.39   | 3200                                     |
| KWP40        | RN40          | Kuwait       | Kuwait City                  | 29.34    | 47.91     | 3718                                     |
| MYP42        | RN42          | Malaysia     | Tanah Rata                   | 4.48     | 101.37    | 3572                                     |
| MRP43        | RN43          | Mauritania   | Nouakchott                   | 18.14    | -15.92    | 4206                                     |

|        |      |                                                      |                                   |        |         |      |
|--------|------|------------------------------------------------------|-----------------------------------|--------|---------|------|
| MXP44  | RN44 | Mexico                                               | Guerrero Negro, Baja California   | 27.96  | -114.06 | 2654 |
| MNP45  | RN45 | Mongolia                                             | Ulaanbaatar                       | 47.89  | 106.33  | 5288 |
| NZP46  | RN46 | New Zealand                                          | Chatham Island                    | -43.82 | -176.48 | 4827 |
| NZP47  | RN47 | New Zealand                                          | Kaitia                            | -35.07 | 173.29  | 5614 |
| NOP49  | RN49 | Norway                                               | Spitsbergen                       | 78.23  | 15.39   | 4215 |
| PAP50  | RN50 | Panama                                               | Panama City                       | 8.98   | -79.53  | 4863 |
| PGP51  | RN51 | Papua New Guinea                                     | Kavieng, New Ireland              | -2.58  | 150.81  | 3902 |
| PHP52  | RN52 | Philippines                                          | Tanay                             | 14.58  | 121.37  | 4706 |
| PTP53  | RN53 | Portugal                                             | Ponta Delgada, São Miguel, Azores | 37.74  | -25.70  | 2422 |
| RUP54  | RN54 | Russian Federation                                   | Kirov                             | 58.59  | 49.41   | 2961 |
| RUP58  | RN58 | Russian Federation                                   | Ussuriysk                         | 44.15  | 132.00  | 3277 |
| RUP59  | RN59 | Russian Federation                                   | Zalesovo                          | 53.94  | 84.79   | 3315 |
| RUP60  | RN60 | Russian Federation                                   | Petropavlovsk-Kamchatskiy         | 53.05  | 158.78  | 3472 |
| RUP61  | RN61 | Russian Federation                                   | Dubna                             | 56.74  | 37.25   | 3840 |
| SEP63_ | RN63 | Sweden                                               | Stockholm                         | 59.41  | 17.95   | 4814 |
| TZP64  | RN64 | United Republic of Tanzania                          | Dar es Salaam                     | -6.78  | 39.20   | 4003 |
| GBP66  | RN66 | United Kingdom of Great Britain and Northern Ireland | BIOT/Chagos Archipelago           | -7.28  | 72.37   | 4290 |
| GBP67  | RN67 | United Kingdom of Great Britain and Northern Ireland | St. Helena                        | -15.94 | -5.67   | 3769 |
| GBP68  | RN68 | United Kingdom of Great Britain and Northern Ireland | Tristan da Cunha                  | -37.07 | -12.31  | 4974 |
| USP70  | RN70 | United States of America                             | Sacramento, CA                    | 38.67  | -121.36 | 5030 |
| USP71  | RN71 | United States of America                             | Sand Point, AK                    | 55.34  | -160.49 | 4361 |
| USP72  | RN72 | United States of America                             | Melbourne, FL                     | 28.10  | -80.65  | 5060 |
| USP73  | RN73 | United States of America                             | Palmer Station                    | -64.77 | -64.05  | 4553 |
| USP74  | RN74 | United States of America                             | Ashland, KS                       | 37.17  | -99.77  | 5319 |
| USP75  | RN75 | United States of America                             | Charlottesville, VA               | 38.00  | -78.40  | 5324 |
| USP76  | RN76 | United States of America                             | Salchaket, AK                     | 64.67  | -147.10 | 4449 |
| USP77  | RN77 | United States of America                             | Wake Island                       | 19.29  | 166.61  | 3882 |
| USP78  | RN78 | United States of America                             | Midway Islands                    | 28.22  | -177.37 | 3722 |
| USP79  | RN79 | United States of America                             | Oahu, HI                          | 21.52  | -157.99 | 4721 |
| USP80  | RN80 | United States of America                             | Upi, Guam                         | 13.57  | 144.93  | 3827 |

26

27

28

Table S2. For each station the  $^{7}\text{Be}$  % of yearly growth versus the overall average is calculated (the growth is based on 1.001 increase of the normalized averaged timeseries).

% values are rounded to zero decimals. Dataset is based on 120 days averaged normalized <sup>7</sup>Be concentration corrected from cosmic rays.

| Treaty number | 2003   | 2004   | 2005   | 2006   | 2007   | 2008   | 2009   | 2010   | 2011   | 2012   | 2013   | 2014   | 2015   | 2016   | 2017   | 2018   | 2019   |
|---------------|--------|--------|--------|--------|--------|--------|--------|--------|--------|--------|--------|--------|--------|--------|--------|--------|--------|
| RN01          | -16.68 | -8.53  | -0.32  | -0.71  | -5.06  | -4.00  | 1.21   | -3.48  | -2.75  | -2.62  | 3.90   | -3.00  | 2.76   | 5.29   | 9.20   | 5.89   | 18.91  |
| RN03          |        | -18.18 | -6.14  | 10.17  | 20.95  |        | -2.48  | -0.85  | -3.55  | 2.98   | -10.13 | -14.54 | 0.03   | 3.63   | -3.86  | 1.34   | 20.62  |
| RN04          | -15.95 | -8.59  | -13.42 | -11.41 | 2.01   | -1.76  | 0.76   | 10.98  | -1.76  | -3.53  | 2.89   | 0.06   | -0.51  | 8.08   | 9.41   | 6.88   | 15.85  |
| RN05          |        |        |        |        |        |        |        |        |        |        | -4.46  | -4.75  | -8.62  | -5.40  | -5.44  | 10.12  | 18.55  |
| RN06          | 11.71  | 2.68   | 2.41   | 0.03   | -3.43  | -8.59  | -2.45  | -6.60  | -21.72 | -10.12 | -4.34  | -0.48  | 2.47   | 12.86  | 15.59  | 11.24  | -1.24  |
| RN07          |        |        |        |        |        |        |        |        |        | -2.88  | -6.10  | 0.81   | 4.28   | -3.30  | -1.70  | -1.06  | 9.95   |
| RN08          | 50.12  | 49.60  | 19.69  | 7.29   | 0.19   | -11.33 | -6.20  | -9.29  | -6.36  | -20.46 | -25.38 | -12.76 | -4.39  | -26.61 | -19.15 | 2.19   | 12.86  |
| RN09          | 18.45  | -2.69  | 1.90   | 10.11  | 0.36   | 17.05  | -13.60 | -0.03  | -19.02 | -5.19  | -0.65  | 0.49   | 1.99   | 0.30   | -1.39  | 3.85   | -11.94 |
| RN10          | -22.13 | -21.03 | -11.23 | -8.20  | 0.88   | 1.05   | 5.05   | 13.64  | 5.39   | 7.76   | 2.10   | 1.37   | 4.07   | 3.24   | 4.93   | 0.45   | 12.66  |
| RN11          | 18.66  | -0.85  | -6.59  | 6.84   | 0.66   | 8.63   | -8.74  | 4.42   | -3.20  | -2.30  | -0.71  | -3.02  | 2.52   | -1.08  | -1.91  | -5.80  | -7.54  |
| RN13          |        |        |        |        |        | 5.66   | -15.52 | 7.09   | 15.33  | -8.96  | -3.72  | 3.49   |        | -10.67 | 3.70   | -1.74  | 5.34   |
| RN14          |        |        |        |        |        |        | 20.37  | -1.78  | -16.78 | -1.29  | -13.17 | 2.03   | 11.70  | -5.59  | -7.37  | -1.38  | 13.25  |
| RN15          |        |        | -6.77  | -12.87 | -21.80 | 7.91   | -14.74 | -15.03 | 17.04  | 20.62  | 1.46   | -12.05 | 0.51   | 15.03  | 8.97   | 3.18   | 8.56   |
| RN16          | -15.09 | -11.56 | -9.67  | 2.52   | 3.77   | -0.61  | -5.03  | 10.79  | 2.38   | 4.41   | -1.15  | -1.69  | 1.36   | 5.28   | 7.92   | 1.42   | 4.95   |
| RN17          |        |        |        | -0.83  | 3.11   | -6.20  | 4.98   | -15.45 | -6.79  | 6.88   | 4.14   | 2.47   | 1.42   | 3.30   | 0.80   | 6.23   | -4.06  |
| RN18          | -9.43  | -10.34 | 11.95  |        | -13.03 | -23.22 | -21.01 | -18.10 | 14.21  | 22.98  | -10.46 | -8.48  | 8.41   | 10.76  | 14.12  | 20.39  | 11.26  |
| RN19          | -11.64 |        | -23.58 | -8.34  | -3.89  |        |        |        | 21.86  | 28.74  | 19.97  | -7.33  | 0.09   | 5.12   | -4.08  | -9.61  | -7.31  |
| RN23          | 5.87   | -7.16  | 0.66   | -0.64  | -0.21  | -5.15  | -1.78  | 2.72   | 4.37   | -0.08  | 1.27   | 2.95   | 3.52   | 8.63   | 1.22   | -6.71  | -9.48  |
| RN26          |        |        | 12.65  | 7.76   | -7.03  | -6.08  | 8.13   | 8.02   | -17.07 | -7.09  | 9.49   | 7.79   | 0.48   | 7.22   | 0.11   | -10.45 | -13.94 |
| RN27          | -7.68  | -13.22 | -20.29 | 13.27  | 18.78  | 33.50  | 34.40  |        |        | 17.23  | -8.89  | -9.87  | -8.58  | -8.76  | -10.55 | -13.22 | -16.13 |
| RN28          |        |        | -7.38  | 3.23   | 13.74  | 8.51   | -3.39  |        | -13.59 | -11.72 | -0.02  | 7.07   | 2.72   | 0.28   | -4.07  | 9.07   | -4.46  |
| RN29          |        | -17.59 | -17.58 | -11.66 | 1.07   | -15.04 | -15.94 | -2.13  | -8.13  | -9.53  | 10.21  | 11.32  | 5.78   | 10.76  | 16.10  | 18.66  | 23.70  |
| RN30          |        |        |        | 6.98   | -9.24  | 3.04   | -0.24  | -11.48 | 4.51   | -0.42  | -12.52 |        | 6.89   | 6.32   | -2.46  | 4.92   | 3.70   |
| RN31          |        |        | -14.60 | -1.00  | -7.88  | 26.10  | 10.77  | -13.94 | -21.74 | -17.85 | -3.82  | 6.84   | 20.69  | -13.72 | -32.25 | 14.21  | 48.17  |
| RN33          |        |        |        |        | 2.15   | 10.75  | 11.07  | 9.17   | -4.41  | -8.57  | -18.02 | -3.94  | -10.82 | -1.35  | 3.62   | 7.31   | 3.04   |
| RN34          | -10.41 | 10.08  |        |        | -11.48 | 7.17   |        | 13.28  | 13.31  | 9.97   | -4.65  | -17.47 | -13.21 | -3.70  | 4.34   | -10.23 | 13.00  |
| RN37          |        |        |        |        | -18.91 | -14.66 | -15.79 | -18.94 | -6.37  | -22.84 | 8.56   | 4.27   | -10.16 | 23.34  | 23.13  | 17.48  | 30.89  |
| RN38          | -3.13  | -0.19  | 13.85  | -6.83  | 1.17   | 16.31  | 13.23  | -21.99 | -10.95 | -13.73 | 6.30   | 0.75   | -7.06  | -3.57  | 2.53   | -3.48  | 16.79  |
| RN39          |        |        |        |        | 24.06  | -15.99 | 5.01   | -6.22  | -9.44  | -6.15  | 48.94  | -7.11  | -16.67 |        | 2.41   | 5.12   | -23.94 |
| RN40          |        | 32.16  | -1.71  | -27.81 | -7.40  | -28.61 | -46.47 | -45.48 | -6.98  | 15.15  | -23.92 |        | 28.35  | 16.17  | 31.76  | 23.20  | 41.61  |
| RN42          |        |        |        |        |        |        | -7.28  | -12.10 | -9.31  | -9.29  | -1.10  | 1.91   | 18.80  | 19.26  | -16.69 | -4.27  | 20.07  |
| RN43          |        |        |        | -0.14  | 9.52   | 7.19   | 3.37   | 7.86   | 10.63  | 22.74  | -17.22 | -23.16 | -21.94 | -14.28 | -3.77  | 4.30   | 14.90  |
| RN44          |        |        |        |        |        |        |        |        | -10.51 | 3.70   | -10.25 | -0.87  | 9.18   | -1.52  | -5.70  | 10.52  | 5.45   |

|      |        |        |        |        |        |        |        |        |        |        |        |        |        |        |        |        |        |
|------|--------|--------|--------|--------|--------|--------|--------|--------|--------|--------|--------|--------|--------|--------|--------|--------|--------|
| RN45 | -16.28 | -8.67  | -23.79 | -18.56 | -18.39 | 0.44   | -0.54  | -0.69  | 1.80   | -6.93  | -20.47 | 15.24  | 9.92   | 28.14  | 14.84  | 18.04  | 25.91  |
| RN46 | -20.14 | -3.24  | 6.06   | -5.44  | 3.96   | 6.50   | -3.24  | -8.53  | -8.45  | 7.54   | 5.49   | 0.74   | -2.83  | 9.54   | -3.84  | -0.56  | 16.45  |
| RN47 | -22.43 | -7.55  | 2.09   | 6.82   | 13.71  | 8.41   | 3.10   | -11.82 | -1.47  | -2.62  | 1.97   | -5.93  | -0.97  | 3.32   | 3.35   | 2.82   | 7.21   |
| RN49 | -8.48  | 37.11  |        |        | -3.66  | 3.81   | 11.25  | 8.44   | -32.92 | -15.61 | 7.84   | -5.59  | 4.25   | -11.49 | -4.29  | -5.60  | 14.93  |
| RN50 |        |        | -32.53 | 17.97  | 3.75   | 6.23   | 24.51  | -26.02 | -6.22  | -8.91  | 2.48   | 5.42   | 10.62  | 2.63   | -9.82  | -10.08 | 19.98  |
| RN51 | 11.15  | 4.64   | 22.71  | -24.44 | -11.66 | 3.28   |        | 26.93  | -0.11  | -14.41 | -22.15 | -19.16 | 30.13  | -15.80 | -3.27  | 7.95   | 4.19   |
| RN52 |        |        |        | 17.24  | 11.28  | -25.26 | -1.57  | -50.78 | -16.28 | -5.55  | 12.98  | 14.60  | 28.73  | -2.08  | -6.12  | -9.29  | 32.09  |
| RN53 |        |        |        |        |        |        |        | -7.77  | -17.17 | -12.57 | -13.89 | -6.40  | 1.52   | -1.74  | 29.50  | 28.52  |        |
| RN54 |        |        |        |        |        | -15.39 |        | 5.60   | 3.10   | 17.02  | -4.56  | 0.24   | 8.16   | -16.08 | 4.12   | -2.21  |        |
| RN58 |        |        |        |        |        |        |        | 1.69   | -1.65  | -9.47  | -1.52  | 4.50   | 4.24   | 0.74   | 10.95  | -3.60  | -5.89  |
| RN59 |        |        |        |        | 3.79   | 6.81   | 18.71  | 11.72  | 14.67  | 19.19  | -3.53  |        | -17.04 | -11.04 | -19.03 | -21.31 | -2.94  |
| RN60 |        |        |        |        |        | -12.78 | 8.49   | 12.09  | -2.72  | 11.15  | 0.17   | -21.28 | -1.87  | -4.29  | -17.49 | 15.38  | 13.16  |
| RN61 |        |        |        |        |        |        | 14.93  | 28.14  | 5.45   | -6.39  | 0.90   | 5.05   | -12.33 | -20.73 | -35.54 | 13.28  | 7.23   |
| RN63 | -5.73  | -4.05  | -5.49  |        | 2.25   | -1.35  | -4.05  | 1.26   | -0.89  | -6.44  | -4.99  | 5.43   | -4.53  | -9.46  | -2.30  | 18.01  | 22.35  |
| RN64 |        |        |        |        | -12.90 | 3.32   | 4.34   | -1.61  | -0.96  | 1.92   | -4.24  | -7.70  | 9.28   | -1.05  | -6.91  | 2.20   | 14.32  |
| RN66 |        | 1.00   | 7.22   | 19.30  | 6.85   | 4.63   | -2.23  | -23.69 | -19.13 | -14.02 | 3.38   | 6.30   | 54.08  | -8.71  | -3.41  | -16.55 | -15.02 |
| RN67 |        |        |        |        | -9.52  | 2.52   | 0.48   | 19.62  | 11.34  | -2.33  | -0.19  | -11.97 | 0.39   | 2.93   | -11.18 | -10.12 | 8.01   |
| RN68 |        | -2.11  | 24.99  | 7.06   | -5.80  | -15.41 | -4.07  | -3.94  | 3.23   | -0.67  | -4.96  | -7.66  | -0.45  | 1.63   | 2.71   | 5.06   | 0.40   |
| RN70 |        | -1.55  | -9.64  |        | 3.36   | 10.04  | 9.25   | -12.17 | -13.52 | 8.32   | -2.26  | -0.26  | 11.44  | 7.27   | 3.49   | -3.14  | -10.63 |
| RN71 |        |        |        |        | -2.60  | 17.45  | 5.49   | -9.00  | 7.50   | -4.53  | 16.41  | 10.23  | -6.23  | -8.05  | 27.63  | -32.18 | -22.11 |
| RN72 |        | -12.06 | 3.03   | 10.70  | 13.00  | 7.38   | 8.50   | 2.86   | 5.05   | -2.01  | -9.04  | -7.30  | -4.81  | -0.10  | -10.12 | -1.25  | -3.84  |
| RN73 |        |        |        | 14.86  | 5.82   | -12.45 | -7.33  | -6.15  | -16.56 | -12.60 | 3.27   | -1.39  | 2.95   | -2.92  | 24.13  | -6.19  | 14.56  |
| RN74 | -12.28 | -2.74  | -7.61  | -3.65  | 2.42   | 1.35   | 5.46   | -6.27  | 0.41   | 14.63  | 3.11   | 0.36   | 6.94   | -5.30  | 5.62   | 3.27   | -5.71  |
| RN75 | -17.77 | -11.44 | -5.08  | 9.67   | 17.59  | 10.26  | -0.18  | -16.22 | -9.18  | 10.37  | 4.45   | 10.05  | 1.92   | -2.97  | 2.21   | -5.96  | 2.30   |
| RN76 |        |        |        |        | 35.07  | -4.36  | 15.07  | -5.11  | -5.80  | -17.04 | -1.51  | -0.10  | -5.18  | -21.26 | -7.87  | 6.26   | 11.83  |
| RN77 |        |        |        |        |        | -10.44 | -1.33  | 2.80   | 4.55   | 2.09   | 4.86   | -3.56  | 7.39   | 2.76   | 0.12   | 0.69   | -9.94  |
| RN78 |        |        |        |        |        |        | -22.13 | -0.76  | -14.31 | -16.27 | 1.31   | 0.55   | 5.13   | 6.07   | 19.31  | 5.23   | 15.86  |
| RN79 |        |        | -7.14  | -4.87  | -10.41 | -2.87  | -6.99  | 3.16   | -3.79  | -4.03  | 2.57   | -7.27  | 1.33   | -0.88  | 20.99  | -0.18  | 20.36  |
| RN80 |        |        |        |        |        | -8.89  | -3.74  | 7.28   | -10.70 | -1.93  | 4.45   | -7.01  | 10.96  | 0.67   | 0.36   | -5.58  | 14.13  |

30

31 **Table S3. N. of days above average during which <sup>7</sup>Be activity concentrations are above 1.001 absolute value (1.001 based on overall averaged normalised data timeseries).**  
32 **This period indicates the extended “warm period” for each year between 2003 and 2019. High levels of concentration are proxy for high Tropopause which is a proxy for warmer tropospheric temperatures. Dataset**  
33 **is based on 120 days averaged normalized <sup>7</sup>Be concentration corrected from cosmic rays.**

34

35 **N. of days are rounded to zero decimals.**

36

| Treaty number | 2003    | 2004    | 2005    | 2006    | 2007    | 2008    | 2009    | 2010    | 2011    | 2012    | 2013    | 2014   | 2015   | 2016    | 2017   | 2018    | 2019    |
|---------------|---------|---------|---------|---------|---------|---------|---------|---------|---------|---------|---------|--------|--------|---------|--------|---------|---------|
| RN01          |         | -33.88  | 8.12    | 34.12   | -19.88  | -25.88  | 25.12   | 1.12    | 11.12   | -13.88  | 28.12   | -9.88  | 8.12   | 33.12   | 74.12  | 15.12   | 36.12   |
| RN03          |         | -51.41  | 14.59   | 98.59   | 45.59   |         |         | 30.59   | 49.59   | 34.59   | -0.41   | -23.41 | 38.59  | 75.59   | 20.59  | 38.59   | 40.59   |
| RN04          | -162.65 | -14.65  | -114.65 | -31.65  | 34.35   | -12.65  | 36.35   | 45.35   | 21.35   | -3.65   | 11.35   | 14.35  | 42.35  | 37.35   | 65.35  | 13.35   | 18.35   |
| RN05          |         |         |         |         |         |         |         |         |         |         | 15.76   | 64.76  | 76.76  | 82.76   | 82.76  | 150.76  | 148.76  |
| RN06          | -50.06  | -7.06   | 27.94   | -6.06   | -6.06   | -83.06  | -15.06  | -97.06  | -90.06  | -61.06  | -14.06  | 9.94   | 44.94  | 192.94  | 105.94 | 121.94  | -74.06  |
| RN07          |         |         |         |         |         |         |         |         |         | 25.06   | -28.94  | 110.06 | 195.06 | 61.06   | 57.06  | 82.06   | 155.06  |
| RN08          | -30.47  | 218.53  | 214.53  | 44.53   | 54.53   | -104.47 | 28.53   | -17.47  | -22.47  | -135.47 | -140.47 | 5.53   | 0.53   | -88.47  | -98.47 | 34.53   | 36.53   |
| RN09          | -54.35  | 11.65   | 36.65   | -1.35   | 17.65   | 109.65  | -55.35  | 30.65   | -52.35  | 7.65    | -6.35   | -0.35  | 27.65  | -6.35   | 19.65  | 39.65   | -124.35 |
| RN10          |         |         | -84.59  | -78.59  | 14.41   | 33.41   | 37.41   | 69.41   | 112.41  | 37.41   | 14.41   | 1.41   | 40.41  | 8.41    | 77.41  | 14.41   | 17.41   |
| RN11          | -51.18  | -47.18  | -110.18 | 165.82  | 47.82   | 158.82  | -35.18  | 117.82  | 2.82    | -47.18  | 6.82    | -38.18 | 117.82 | -4.18   | 20.82  | -145.18 |         |
| RN13          |         |         |         |         |         | 99.65   | 1.65    | 150.65  | 139.65  | -8.35   | 53.65   | -1.35  |        | -35.35  | 121.65 | 26.65   | 23.65   |
| RN14          |         |         |         |         |         |         | -91.59  | 83.41   |         | 128.41  | 5.41    | 125.41 | 223.41 | 32.41   | 9.41   | 103.41  | 91.41   |
| RN15          |         |         | 25.24   | -124.76 | -120.76 | 34.24   | -14.76  | -45.76  | 99.24   | 31.24   | 23.24   | -27.76 | 82.24  | 118.24  | 71.24  | 92.24   | 12.24   |
| RN16          | -125.65 | -36.65  | -37.65  | 30.35   | 8.35    | 2.35    | 12.35   | 37.35   | 8.35    | 31.35   | 21.35   | -8.65  | 1.35   | 41.35   | 30.35  | 10.35   | -26.65  |
| RN17          |         |         |         | -92.24  | 76.76   | -17.24  | 62.76   | -131.24 | -42.24  | 133.76  | 85.76   | 85.76  | 10.76  | 71.76   | 30.76  | 162.76  | -35.24  |
| RN18          | -129.94 | -104.94 | 70.06   |         | -44.94  |         |         |         | 141.06  | -72.94  | -24.94  | -24.94 | 108.06 | 195.06  | 95.06  | 228.06  | 113.06  |
| RN19          |         |         |         | 5.12    | 60.12   |         |         |         | -18.88  | 235.12  | 79.12   | -57.88 | 108.12 | 118.12  | 92.12  | -46.88  | 1.12    |
| RN23          | -63.76  | -48.76  | 51.24   | 15.24   | 11.24   | -24.76  | -0.76   | -26.76  | -33.76  | 5.24    | 6.24    | 59.24  | 34.24  | 132.24  | 41.24  | -23.76  | -133.76 |
| RN26          |         |         | 33.88   | 110.88  | 5.88    | -8.12   | 47.88   | 74.88   | -33.12  | 5.88    | 88.88   | 78.88  | 65.88  | 52.88   | 0.88   | -79.12  | -148.12 |
| RN27          | -103.24 | -57.24  | -78.24  | 242.76  | 244.76  | 244.76  | -109.24 |         |         | 68.76   | 6.76    | -70.24 | -6.24  | -11.24  | 17.76  | -31.24  | -118.24 |
| RN28          |         |         | -7.41   | 47.59   | 168.59  | 140.59  | -8.41   |         | -61.41  | -42.41  | -118.41 | 10.59  | 42.59  | 92.59   | 6.59   | 116.59  | -23.41  |
| RN29          |         |         | -126.59 | -81.59  | 12.41   | -91.59  | -112.59 | -88.59  | -124.59 |         | 75.41   | 223.41 | 45.41  | 212.41  | 191.41 | 157.41  | 114.41  |
| RN30          |         |         |         | -55.00  | -11.00  | 117.00  | 61.00   |         | 107.00  | 65.00   |         |        | 126.00 | 73.00   | -10.00 | 120.00  | 25.00   |
| RN31          |         |         |         | -26.76  |         | 226.24  | 102.24  | -3.76   | -76.76  | -85.76  | 24.24   | 52.24  | 174.24 | 27.24   |        | 94.24   | 96.24   |
| RN33          |         |         |         |         | 32.12   | 164.12  | 81.12   | 62.12   | 4.12    | 39.12   | -83.88  | 25.12  | -4.88  | 47.12   | 62.12  | 77.12   | 18.12   |
| RN34          |         | 3.12    |         |         |         | -22.88  |         | 163.12  | 121.12  | 130.12  | 29.12   | -95.88 | -56.88 | 33.12   | 140.12 | -8.88   | 59.12   |
| RN37          |         |         |         |         | 20.53   | 31.53   | -1.47   | 26.53   | 51.53   | -29.47  | 74.53   | 98.53  | 7.53   | -28.47  | 100.53 | 111.53  | 70.53   |
| RN38          |         | -106.29 | 91.71   | -103.29 | 80.71   | -65.29  | 97.71   |         | -32.29  | -109.29 | 71.71   | 54.71  | -1.29  | 35.71   | 111.71 | 13.71   | 102.71  |
| RN39          |         |         |         |         | -1.24   | 35.76   | 84.76   | 113.76  | 63.76   | 57.76   | -37.24  | 25.76  |        |         | 53.76  | 124.76  | -34.24  |
| RN40          |         | 37.35   | 51.35   |         | -92.65  |         |         |         | 1.35    | 113.35  |         |        | -0.65  | 91.35   | 230.35 | 173.35  | 71.35   |
| RN42          |         |         |         |         |         |         | -55.65  | -52.65  | 19.35   | 47.35   | 114.35  | 44.35  | 220.35 | 174.35  |        | 107.35  | 92.35   |
| RN43          |         |         |         | -117.18 | 183.82  | 114.82  | 89.82   | 125.82  | 191.82  | 131.82  |         |        |        | -123.18 | -25.18 | 129.82  | 108.82  |
| RN44          |         |         |         |         |         |         |         |         | -37.00  | 112.00  | -61.00  | 84.00  | 87.00  | 82.00   | 50.00  | 172.00  | 79.00   |

|      |         |         |         |         |         |         |        |         |         |        |        |        |        |        |        |        |         |
|------|---------|---------|---------|---------|---------|---------|--------|---------|---------|--------|--------|--------|--------|--------|--------|--------|---------|
| RN45 |         | -63.88  |         |         |         | 36.12   | 60.12  | 10.12   | 73.12   | -21.88 |        | 189.12 | 69.12  | 117.12 | 89.12  | 139.12 | 92.12   |
| RN46 |         | -1.29   | -117.29 | -52.29  | 59.71   | 74.71   | 24.71  | -23.29  | -53.29  | 36.71  | 21.71  | 31.71  | 24.71  | 54.71  | 5.71   | 17.71  | 40.71   |
| RN47 |         | -36.76  | 13.24   | 74.24   | 87.24   | 30.24   | -2.76  | -24.76  | -26.76  | -5.76  | 2.24   | -30.76 | -4.76  | 59.24  | -0.76  | 32.24  | -5.76   |
| RN49 | -81.24  | -97.24  |         |         | 35.76   | 64.76   | 88.76  | 38.76   |         | 3.76   | 60.76  | 5.76   | 101.76 | 4.76   | 24.76  | 27.76  | 75.76   |
| RN50 |         |         |         | 76.71   | 37.71   | 53.71   | 30.71  | -62.29  | 33.71   | -13.29 | 40.71  | 49.71  | 75.71  | 28.71  | 5.71   | -5.29  | 41.71   |
| RN51 | -9.00   | 43.00   | -37.00  | -47.00  | 15.00   | -111.00 |        | 3.00    | 63.00   | -7.00  | -97.00 | -50.00 | 225.00 | -86.00 | 8.00   | 173.00 | 39.00   |
| RN52 |         |         |         | 98.65   | 72.65   | -123.35 | -3.35  |         | -1.35   | -5.35  | 77.65  | 79.65  | 149.65 | 72.65  | 20.65  | 6.65   | 68.65   |
| RN53 |         |         |         |         |         |         |        |         | 40.12   |        | 25.12  | -1.88  | 94.12  | 208.12 | 120.12 | 33.12  | 173.12  |
| RN54 |         |         |         |         |         | -64.82  |        |         | 55.18   | 103.18 | 2.18   | 90.18  | 90.18  | 112.18 | 48.18  | 102.18 | 34.18   |
| RN58 |         |         |         |         |         |         |        | 87.29   | 60.29   | -22.71 | 35.29  | 109.29 | 175.29 | 60.29  | 178.29 | 78.29  | -35.71  |
| RN59 |         |         |         |         | -61.82  | 103.18  | 93.18  | 115.18  | 116.18  | 112.18 | 17.18  |        |        | 31.18  | -4.82  | 3.18   | 20.18   |
| RN60 |         |         |         |         |         |         | 93.35  | 92.35   | 80.35   | 134.35 | 79.35  | -79.65 | 30.35  | 49.35  | -88.65 | 101.35 | 117.35  |
| RN61 |         |         |         |         |         |         | 104.82 | 121.82  | 75.82   | 58.82  | 72.82  | 102.82 | 5.82   | 0.82   |        | 129.82 | 20.82   |
| RN63 | -99.65  | 22.35   | -21.65  |         | 16.35   | -4.65   | 10.35  | 8.35    | 42.35   | 6.35   | 22.35  | 77.35  | 1.35   | -20.65 | 19.35  | 73.35  | -6.65   |
| RN64 |         |         |         |         |         | 98.65   | 144.65 | 69.65   | 26.65   | 31.65  | -17.35 | -2.35  | 190.65 | 28.65  | 44.65  | -50.35 | -38.35  |
| RN66 |         | -101.00 | 28.00   | -10.00  | 82.00   | 109.00  | 79.00  |         |         |        | 131.00 | 112.00 | 218.00 | -32.00 | 8.00   |        |         |
| RN67 |         |         |         |         | -81.76  | 25.24   | -45.76 | 241.24  | 182.24  | 32.24  | 56.24  | -32.76 | 43.24  | 117.24 | -39.76 | -63.76 | 61.24   |
| RN68 |         | -127.24 | 144.76  | 59.76   | 13.76   | -56.24  | 6.76   | -12.24  | 44.76   | -4.24  | 8.76   | -9.24  | 8.76   | 6.76   | 37.76  | 28.76  | -12.24  |
| RN70 | -155.82 | -31.82  | -78.82  | -115.82 | 79.18   | 172.18  | 39.18  | -131.82 | -130.82 | 177.18 | -12.82 | 26.18  | 130.18 | 83.18  | 113.18 | -45.82 | -116.82 |
| RN71 |         |         |         |         | 52.88   | 136.88  | 65.88  | 62.88   | 62.88   | 65.88  | 125.88 | 166.88 | -63.12 | -57.12 | 76.88  |        |         |
| RN72 |         |         | 62.18   | 99.18   | 112.18  | 97.18   | 47.18  | 48.18   | 66.18   | 24.18  | -33.82 | -78.82 | -55.82 | 5.18   | -40.82 | 21.18  | -65.82  |
| RN73 |         |         |         | 54.29   | 145.29  | -63.71  | -28.71 | 13.29   |         | -44.71 | 44.29  | 52.29  | 84.29  | -25.71 | 233.29 | -7.71  | 70.29   |
| RN74 |         | 31.88   | -124.12 | -14.12  | -15.12  | 42.88   | 72.88  | -35.12  | 27.88   | 193.88 | 12.88  | -18.12 | 78.88  | -86.12 | 85.88  | 3.88   | -92.12  |
| RN75 |         | -82.35  | -71.35  | 94.65   | 139.65  | 81.65   | -0.35  | -144.35 | -98.35  | 84.65  | 25.65  | 94.65  | 43.65  | -14.35 | 40.65  | -38.35 | 1.65    |
| RN76 |         |         |         |         | 110.29  | 27.29   | 102.29 | 21.29   | 49.29   | -1.71  | 46.29  | 31.29  | 17.29  | -93.71 | 39.29  | 107.29 | 14.29   |
| RN77 |         |         |         |         |         | -68.71  | 39.29  | 92.29   | 94.29   | 80.29  | 106.29 | 10.29  | 79.29  | 59.29  | 81.29  | 87.29  | -92.71  |
| RN78 |         |         |         |         |         |         |        | 81.12   |         | -80.88 | 80.12  | 70.12  | 118.12 | 103.12 | 221.12 | 116.12 | 114.12  |
| RN79 |         |         |         | -78.06  | -100.06 | 35.94   | -29.06 | 54.94   | 4.94    | 13.94  | 39.94  | -79.06 | 73.94  | 42.94  | 245.94 | 11.94  | 118.94  |
| RN80 |         |         |         |         |         | 24.59   | 27.59  | 48.59   | 7.59    | 51.59  | 78.59  | 56.59  | 61.59  | 89.59  | 56.59  | 54.59  | 54.59   |

37

38 **Table S4.** Count the maximum consecutive n. of days per year per station that are required to transit from the yearly MEAN value (based on normalized <sup>7</sup>Be value) up to the yearly MAXIMA which is a variable  
39 threshold from year to year. The Maxima indicates when the convergence zone is closest to the station. The transit time between Mean and the Maxima indicate a time period of cell progression which is a proxy for  
40 Hadley cell circulation strengthening or weakening. The higher the number of days required to reach the maxima, the slower the cell progression, the weaker the circulation. N. of days are rounded to zero decimals.  
41 Dataset is based on 120 days averaged normalized <sup>7</sup>Be concentration corrected from cosmic rays.  
42

|               |      |      |      |      |      |      |      |      |      |      |      |      |      |      |      |      |      |
|---------------|------|------|------|------|------|------|------|------|------|------|------|------|------|------|------|------|------|
| Treaty number | 2003 | 2004 | 2005 | 2006 | 2007 | 2008 | 2009 | 2010 | 2011 | 2012 | 2013 | 2014 | 2015 | 2016 | 2017 | 2018 | 2019 |
|---------------|------|------|------|------|------|------|------|------|------|------|------|------|------|------|------|------|------|

|      |    |     |     |     |     |     |     |     |     |     |     |     |     |     |     |     |     |
|------|----|-----|-----|-----|-----|-----|-----|-----|-----|-----|-----|-----|-----|-----|-----|-----|-----|
| RN01 | 54 | 177 | 182 | 208 | 170 | 159 | 188 | 184 | 186 | 177 | 183 | 170 | 169 | 187 | 184 | 159 | 138 |
| RN03 |    | 140 | 168 | 189 | 134 |     | 2   | 167 | 194 | 165 | 168 | 179 | 172 | 177 | 167 | 169 | 131 |
| RN04 | 44 | 175 | 199 | 199 | 191 | 161 | 199 | 169 | 196 | 184 | 164 | 185 | 215 | 177 | 187 | 159 | 151 |
| RN05 |    |     |     |     |     |     |     |     |     | 82  | 158 | 148 | 173 | 159 | 143 | 134 |     |
| RN06 | 64 | 125 | 172 | 149 | 166 | 145 | 153 | 129 | 129 | 146 | 176 | 170 | 190 | 148 | 185 | 184 | 90  |
| RN07 |    |     |     |     |     |     |     |     |     | 155 | 167 | 147 | 179 | 186 | 161 | 169 | 134 |
| RN08 | 61 | 176 | 120 | 133 | 178 | 75  | 190 | 136 | 168 | 183 | 172 | 207 | 158 | 162 | 204 | 159 | 128 |
| RN09 | 67 | 189 | 172 | 151 | 176 | 193 | 186 | 194 | 190 | 185 | 164 | 167 | 173 | 148 | 192 | 165 | 115 |
| RN10 | 51 | 202 | 165 | 169 | 171 | 189 | 155 | 153 | 238 | 181 | 167 | 155 | 170 | 162 | 198 | 171 | 127 |
| RN11 | 61 | 125 | 219 | 173 | 201 | 196 | 172 | 224 | 181 | 178 | 170 | 165 | 209 | 164 | 203 | 160 | 138 |
| RN13 |    |     |     |     |     | 170 | 194 | 224 | 94  | 136 | 194 | 89  |     | 147 | 177 | 148 | 108 |
| RN14 |    |     |     |     |     |     | 4   | 179 | 146 | 207 | 162 | 163 | 226 | 183 | 208 | 196 | 120 |
| RN15 |    |     | 175 | 17  | 99  | 155 | 195 | 168 | 135 | 103 | 150 | 198 | 223 | 168 | 174 | 218 | 117 |
| RN16 | 54 | 185 | 161 | 186 | 158 | 164 | 183 | 164 | 165 | 181 | 182 | 156 | 159 | 191 | 171 | 160 | 125 |
| RN17 |    |     |     | 68  | 187 | 203 | 156 | 198 | 195 | 233 | 200 | 212 | 143 | 158 | 164 | 204 | 114 |
| RN18 | 52 | 162 | 163 |     | 112 | 184 | 167 | 164 | 182 | 63  | 135 | 193 | 182 | 167 | 168 | 165 | 133 |
| RN19 | 38 |     | 82  | 167 | 160 |     |     |     | 28  | 193 | 136 | 107 | 188 | 159 | 196 | 198 | 114 |
| RN23 | 57 | 174 | 209 | 179 | 173 | 178 | 164 | 97  | 66  | 167 | 140 | 190 | 180 | 169 | 196 | 189 | 125 |
| RN26 |    |     | 148 | 224 | 187 | 163 | 172 | 177 | 160 | 190 | 165 | 206 | 214 | 155 | 153 | 180 | 130 |
| RN27 | 69 | 169 | 121 | 134 | 160 | 108 | 4   |     |     | 99  | 169 | 203 | 186 | 138 | 176 | 180 | 96  |
| RN28 |    |     | 163 | 158 | 150 | 247 | 217 |     | 119 | 127 | 18  | 67  | 160 | 241 | 157 | 187 | 114 |
| RN29 |    | 45  | 177 | 108 | 149 | 145 | 214 | 71  | 120 | 210 | 187 | 140 | 143 | 156 | 175 | 190 | 102 |
| RN30 |    |     |     | 24  | 181 | 203 | 166 | 75  | 200 | 171 | 125 |     | 184 | 170 | 162 | 174 | 123 |
| RN31 |    |     | 147 | 95  | 31  | 159 | 175 | 177 | 150 | 175 | 167 | 152 | 175 | 164 | 144 | 159 | 122 |
| RN33 |    |     |     |     | 156 | 190 | 192 | 159 | 144 | 205 | 144 | 232 | 210 | 184 | 180 | 188 | 139 |
| RN34 | 47 | 63  |     |     | 111 | 58  |     | 171 | 143 | 153 | 145 | 137 | 203 | 153 | 207 | 146 | 129 |
| RN37 |    |     |     |     | 195 | 193 | 197 | 218 | 189 | 206 | 186 | 218 | 156 | 49  | 189 | 204 | 153 |
| RN38 | 5  | 13  | 120 | 46  | 191 | 18  | 162 | 192 | 163 | 186 | 128 | 171 | 175 | 195 | 186 | 165 | 110 |
| RN39 |    |     |     |     | 43  | 169 | 137 | 203 | 155 | 146 | 25  | 121 | 1   |     | 123 | 165 | 110 |
| RN40 |    | 91  | 182 | 75  | 95  | 187 | 234 | 16  | 156 | 170 | 58  |     | 67  | 179 | 190 | 160 | 99  |
| RN42 |    |     |     |     |     |     | 93  | 202 | 195 | 164 | 229 | 139 | 166 | 156 | 194 | 226 | 136 |
| RN43 |    |     |     | 24  | 189 | 193 | 149 | 246 | 201 | 159 | 150 | 192 | 167 | 163 | 195 | 193 | 98  |
| RN44 |    |     |     |     |     |     |     |     | 67  | 181 | 37  | 204 | 63  | 180 | 179 | 196 | 139 |
| RN45 | 60 | 204 | 182 | 194 | 188 | 193 | 218 | 170 | 223 | 180 | 227 | 229 | 151 | 178 | 152 | 137 | 121 |
| RN46 | 39 | 153 | 24  | 139 | 196 | 193 | 177 | 182 | 236 | 170 | 150 | 176 | 178 | 149 | 159 | 176 | 141 |



|      |    |     |     |     |     |     |     |     |     |     |     |     |     |     |     |     |     |
|------|----|-----|-----|-----|-----|-----|-----|-----|-----|-----|-----|-----|-----|-----|-----|-----|-----|
| RN47 | 44 | 178 | 167 | 216 | 191 | 175 | 154 | 206 | 168 | 167 | 154 | 170 | 166 | 211 | 155 | 185 | 145 |
| RN49 | 47 | 11  |     |     | 179 | 170 | 196 | 139 | 99  | 175 | 160 | 163 | 206 | 137 | 154 | 159 | 162 |
| RN50 |    |     | 31  | 167 | 166 | 176 | 119 | 97  | 181 | 164 | 170 | 174 | 190 | 158 | 160 | 161 | 121 |
| RN51 | 39 | 149 | 87  | 143 | 176 | 5   |     | 92  | 178 | 153 | 114 | 76  | 126 | 146 | 132 | 170 | 147 |
| RN52 |    |     |     | 125 | 193 | 192 | 133 | 29  | 161 | 165 | 179 | 182 | 141 | 204 | 167 | 173 | 146 |
| RN53 |    |     |     |     |     |     |     |     | 139 | 203 | 168 | 130 | 205 | 196 | 159 | 44  | 120 |
| RN54 |    |     |     |     |     | 28  |     |     | 125 | 166 | 59  | 180 | 171 | 180 | 194 | 173 | 117 |
| RN58 |    |     |     |     |     |     |     | 170 | 188 | 142 | 158 | 191 | 207 | 150 | 152 | 205 | 134 |
| RN59 |    |     |     |     | 27  | 178 | 154 | 143 | 183 | 176 | 131 |     | 17  | 164 | 150 | 197 | 121 |
| RN60 |    |     |     |     |     | 8   | 141 | 143 | 200 | 142 | 182 | 179 | 153 | 181 | 180 | 137 | 119 |
| RN61 |    |     |     |     |     |     | 169 | 186 | 165 | 179 | 170 | 193 | 161 | 167 | 193 | 209 | 112 |
| RN63 | 69 | 194 | 135 |     | 146 | 144 | 185 | 151 | 191 | 182 | 200 | 153 | 186 | 187 | 181 | 191 | 130 |
| RN64 |    |     |     |     | 112 | 181 | 196 | 208 | 167 | 130 | 201 | 149 | 159 | 177 | 203 | 54  | 66  |
| RN66 |    | 16  | 109 | 55  | 136 | 198 | 215 | 35  | 23  | 192 | 228 | 99  | 151 | 120 | 181 | 167 | 139 |
| RN67 |    |     |     |     | 81  | 146 | 79  | 152 | 188 | 170 | 194 | 196 | 186 | 207 | 100 | 142 | 112 |
| RN68 |    | 46  | 156 | 145 | 180 | 145 | 166 | 154 | 174 | 136 | 164 | 186 | 153 | 144 | 168 | 161 | 127 |
| RN70 |    | 133 | 123 |     | 202 | 116 | 135 | 205 | 138 | 203 | 172 | 183 | 180 | 186 | 149 | 139 | 71  |
| RN71 |    |     |     |     | 177 | 148 | 180 | 201 | 176 | 209 | 196 | 175 | 212 | 194 | 178 | 212 | 149 |
| RN72 |    | 32  | 213 | 144 | 144 | 193 | 188 | 168 | 213 | 194 | 191 | 215 | 223 | 162 | 213 | 194 | 128 |
| RN73 |    |     |     | 83  | 195 | 107 | 160 | 201 | 177 | 168 | 170 | 191 | 169 | 139 | 176 | 186 | 125 |
| RN74 | 62 | 212 | 207 | 181 | 143 | 200 | 204 | 234 | 196 | 161 | 170 | 154 | 207 | 202 | 159 | 157 | 110 |
| RN75 | 62 | 148 | 203 | 191 | 201 | 185 | 158 | 248 | 170 | 170 | 157 | 189 | 193 | 189 | 186 | 148 | 157 |
| RN76 |    |     |     |     | 145 | 156 | 149 | 163 | 177 | 166 | 165 | 148 | 161 | 192 | 170 | 214 | 112 |
| RN77 |    |     |     |     |     | 162 | 162 | 190 | 163 | 175 | 207 | 167 | 155 | 167 | 210 | 201 | 142 |
| RN78 |    |     |     |     |     |     | 85  | 191 | 176 | 175 | 182 | 175 | 185 | 191 | 165 | 145 | 134 |
| RN79 |    |     | 49  | 85  | 182 | 187 | 185 | 157 | 188 | 161 | 144 | 208 | 191 | 184 | 155 | 156 | 132 |
| RN80 |    |     |     |     |     | 196 | 160 | 157 | 203 | 180 | 196 | 201 | 140 | 211 | 180 | 188 | 146 |

43

44 **Table S5. Tropopause profile figure 4 is based on the below data table featuring <sup>7</sup>Be % of growth over the overall average and re-analysis data (aggregation of different grid resolution as presented in figure 1 of**  
45 **Schmidt et al. 2008). The correlation with <sup>7</sup>Be growth in 2017 is 0.81. Positive trend is in agreement with the re-analysis data. In 2019 the trend varies at the equator but we currently do not have re-analysis data of**  
46 **2019 available. 2005, 2017, and 2019 are selected to show the tropopause growth trend.**

47

| IMS Station | <sup>7</sup> Be % of Growth versus average along the Canadian-Antarctica profile |          |          |          | Aggregation of re-analysis measurement (Schmidt et al. 2008) |                   |
|-------------|----------------------------------------------------------------------------------|----------|----------|----------|--------------------------------------------------------------|-------------------|
|             | Latitude                                                                         | % (2005) | % (2017) | % (2019) | Latitude                                                     | mt/Yr (2001-2007) |

|                                                                                        |       |        |            |        |     |     |
|----------------------------------------------------------------------------------------|-------|--------|------------|--------|-----|-----|
| RN73                                                                                   | -64.5 |        | 24.13      | 14.56  | -75 | 40  |
| RN18                                                                                   | -53.1 | 11.95  | 14.12      | 11.26  | -68 | 18  |
| RN03                                                                                   | -41.1 | -6.14  | -3.86      | 20.62  | -55 | -10 |
| RN01                                                                                   | -34   | -0.32  | 9.20       | 18.91  | -35 | 45  |
| RN11                                                                                   | -22.5 | -6.59  | -1.91      | -7.54  | -20 | -5  |
| RN50                                                                                   | 8.9   | -32.53 | -9.82      | 19.98  | 9   | -18 |
| RN44                                                                                   | 28    |        | -5.70      | 5.45   | 19  | 2   |
| RN70                                                                                   | 38.7  | -9.64  | 3.49       | -10.63 | 30  | 37  |
| RN14                                                                                   | 49.3  |        | -7.37      | 13.25  | 60  | 3   |
| RN15                                                                                   | 74.7  | -6.77  | 8.97       | 8.56   | 85  | 28  |
| Correlation between <sup>7</sup> Be % of growth and radio-sonde based data (2001-2007) |       | 0.5    | <b>0.8</b> | -0.1   |     |     |

48

49 **Supplementary Figures**

50

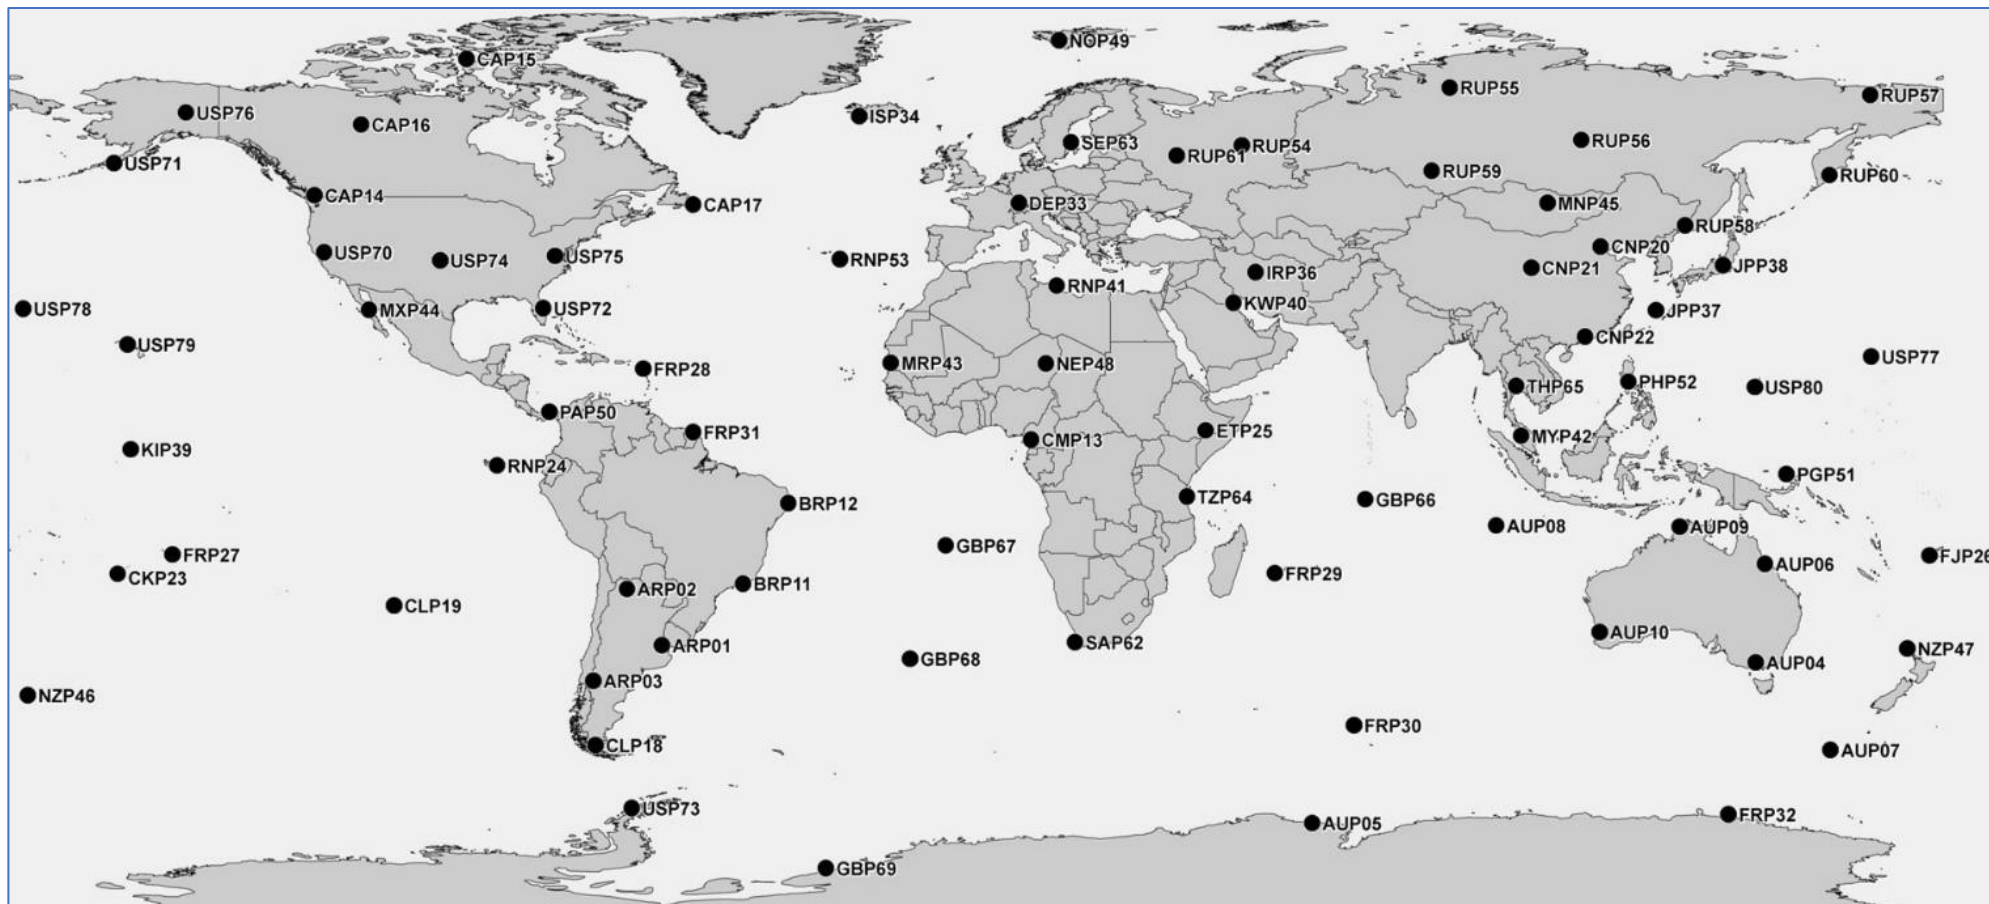

51

52 *Figure S1.* The radionuclide component of the International Monitoring System consists of 80 stations (70 stations currently certified for operation) and aims at the detection of signature isotopes from nuclear  
 53 explosions. Software used to produce figure S1: QGIS Development Team (2019). QGIS Geographic Information System. Open Source Geospatial Foundation Project. <http://qgis.osgeo.org>.

54

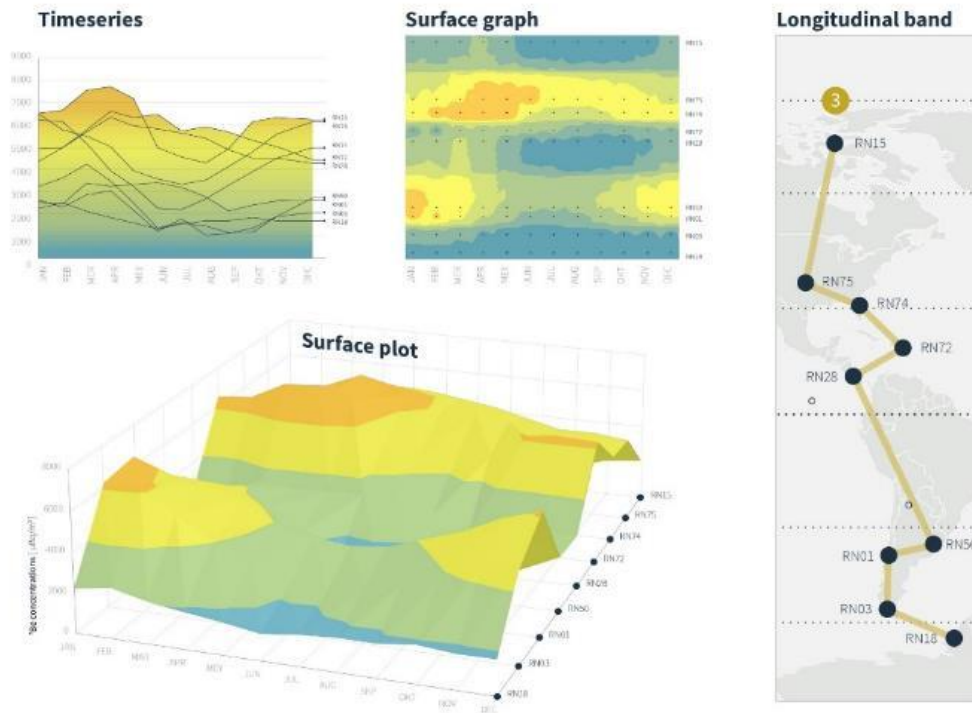

55

56 *Figure S2. Reconstruction of HFIZ or downward branch of the Hadley circulation through beryllium 7 is demonstrated in Terzi and Kalinowski (2017) [54].*

57

58

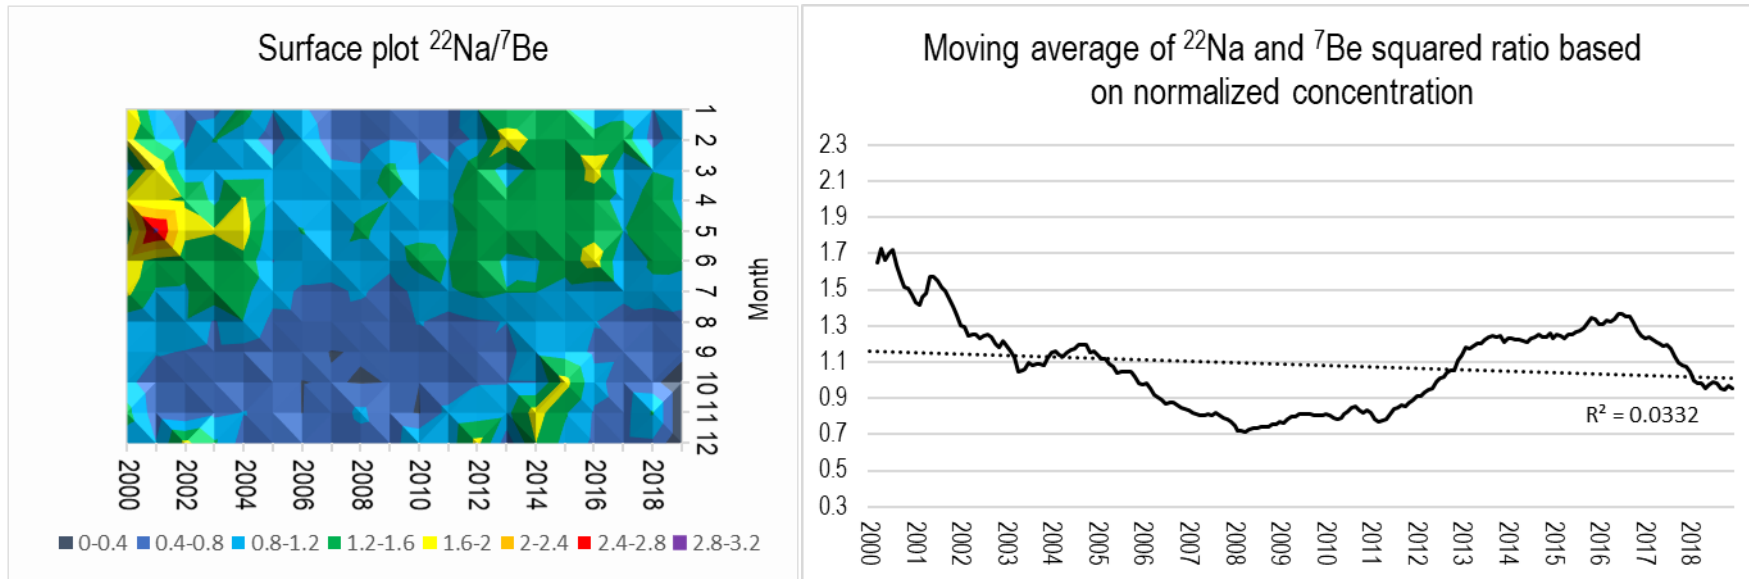

59

60 Figure S3. Change of atmospheric cells progression is also visible through isotopic ratio change over time. As seasons have characteristic isotopic ratio due to the position of the convergence zones over time,  
 61 isotopic ratio of  $^{22}\text{Na}$  and  $^7\text{Be}$  can also indicate the circulation trend. In this case ratios are from Switzerland where the seasonal gradient of the isotopic ratio has decreased over time possibly indicating the slowing  
 62 down of atmospheric cell. The surface charts above show the change of atmospheric cells progression visible through isotopic ratio change over time. The figure displays how much the radioisotope ratio seasonal  
 63 gradient ( $^{22}\text{Na}$  versus  $^7\text{Be}$ ) varies over time, meaning that a seasonal peak is expression of fast transition of the atmospheric cell convergence zone over the point of measurement (IMS Station). In Switzerland, where  
 64 the plotted data come from, that typically happen during pre-summer season, end of April beginning of June. A plane like feature of the seasonal profile indicate a slowing down of Hadley cell progression, meaning  
 65 more time is needed to transit to a different ratio value. Between 2000 and 2018 a gradual transition from peak to plane is observed, possibly indicating a general weakening of the circulation over Switzerland. Right  
 66 chart displays the same dataset where decreasing speed trend (linear trendline) is indicated by the dotted black line. Looking at the Na-22/Be-7 ratio provides a better indicator for the origin of air masses, since the  
 67 ratio is very sensitive to the height of production with much lower values in the lower stratosphere than in the upper troposphere. Unfortunately, due to the much lower abundance of Na-22 (activity ratio of Be-7/Na-  
 68 22 ratio is on the order of 10 to 4) no global Na-22 dataset is available comparable to the here discussed Be-7 data. Data have been provided by P. Steinmann from BAG Bern, Switzerland.

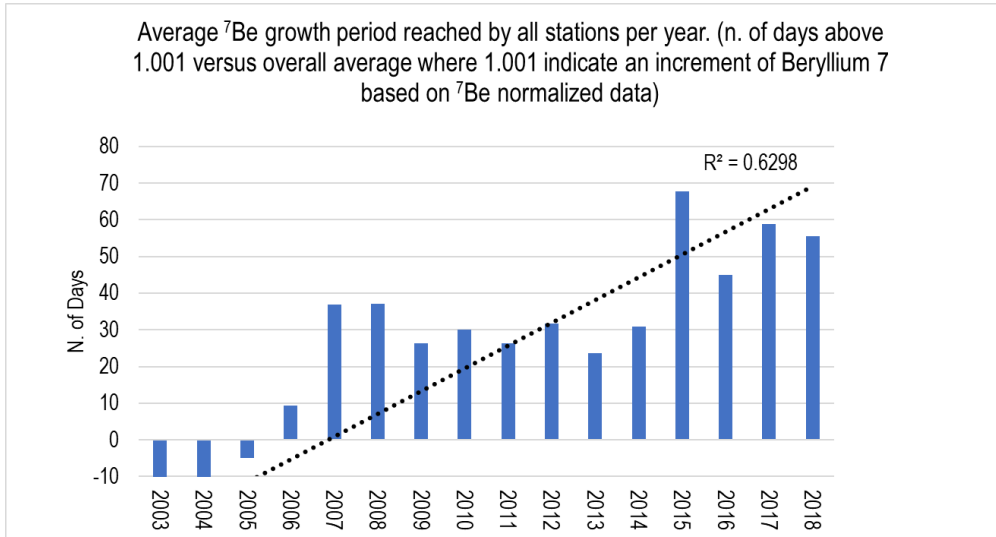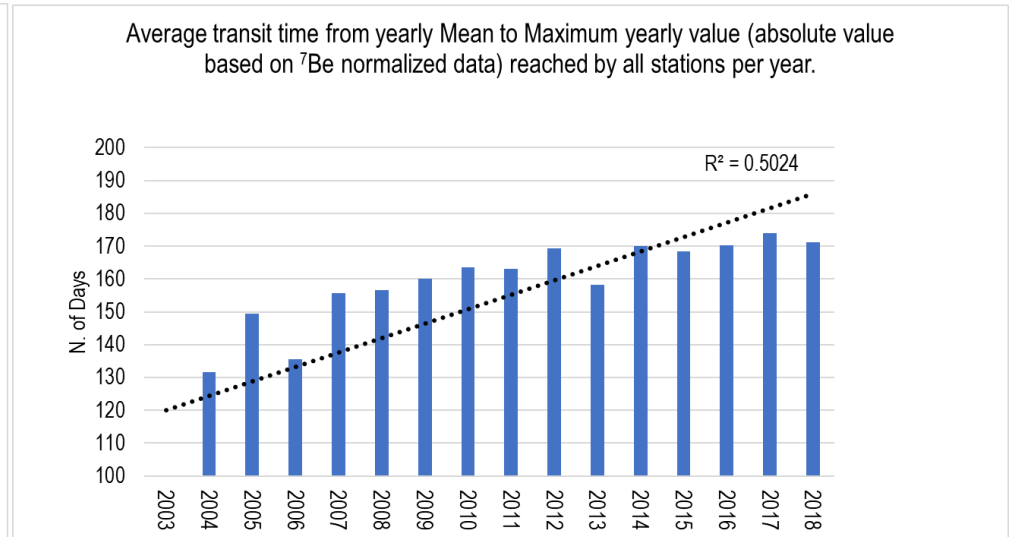

69

70

71

72

**Figure S4.** The left chart shows the global (62 IMS stations considered, for details please see table S1)  $^7\text{Be}$  growth versus average with a clear positive linear trend (black continuous line). The right chart shows, based on the same 62 stations, the increase in the n. of days required per year to reach the maximum threshold from a baseline of the yearly mean. The trend is positive which indicates a weakening of cell progression and therefore suggest a slowing down of the general circulation. Presented dataset has been corrected from cosmic rays.

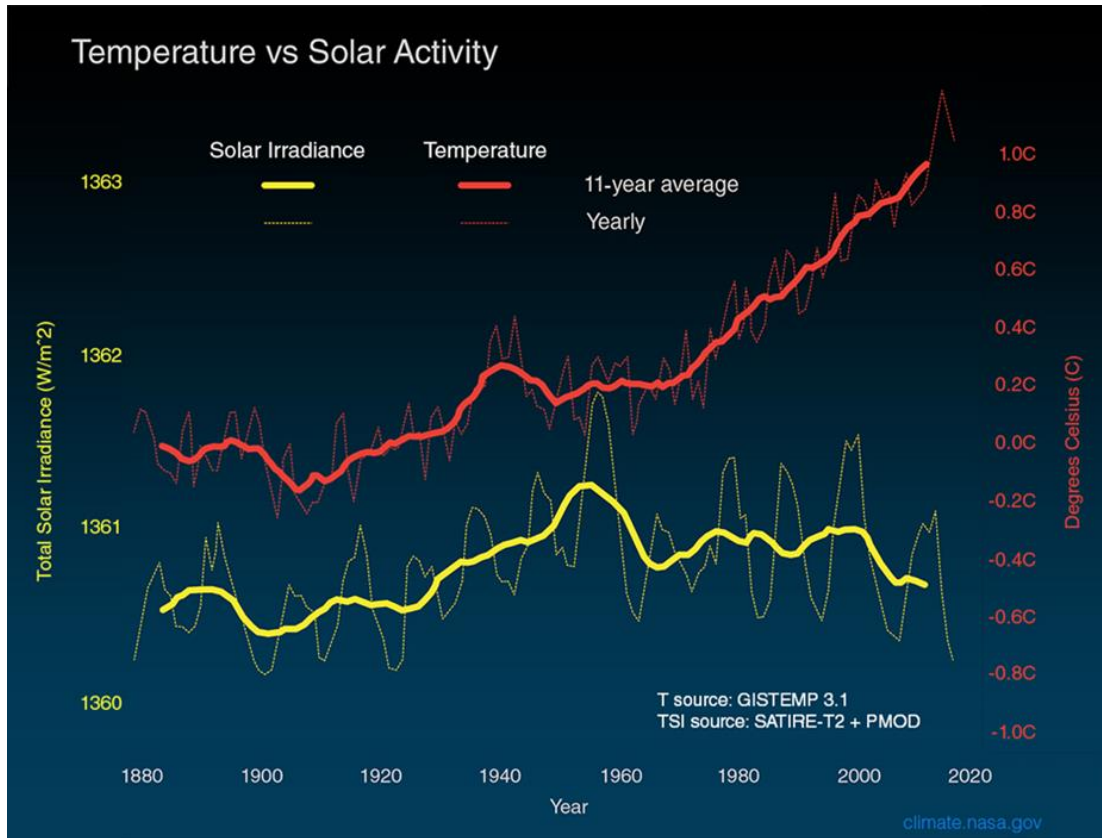

73

74

75

76

77

*Figure S5.* Global surface temperature changes (red line) and Sun's energy that Earth receives (yellow line) in watts (units of energy) per square meter since 1880. The lighter/thinner lines show the yearly levels while the heavier/thicker lines show the 11-year average trends. Eleven-year averages are used to reduce the year-to-year natural noise in the data, making the underlying trends more obvious. The amount of solar energy that Earth receives has followed the Sun's natural 11-year cycle of small ups and downs with no net increase since the 1950s. Over the same period, global temperature has risen markedly. It is therefore extremely unlikely that the Sun has caused the observed global temperature warming trend over the past half-century. Credit: NASA/JPL-Caltech [55].

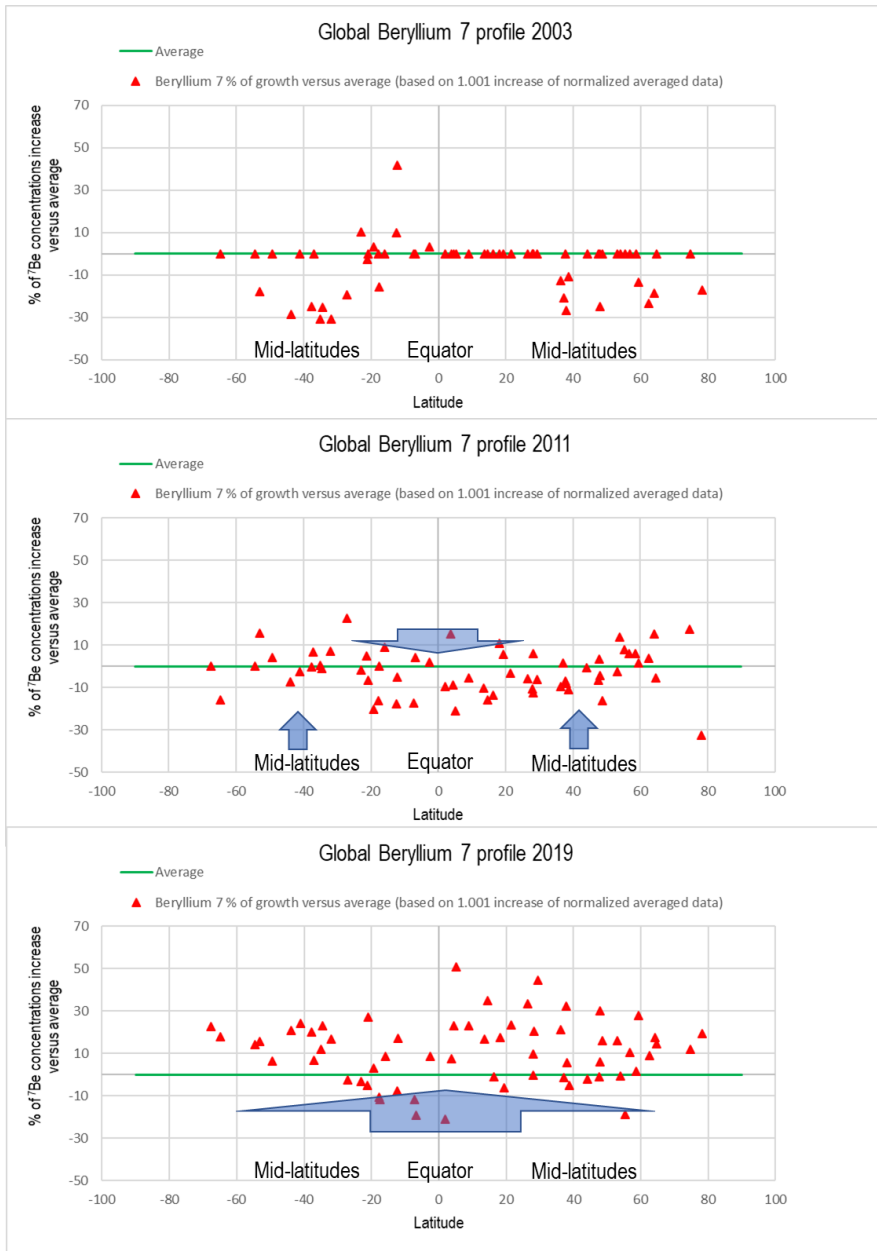

78

79

Figure S6. Supplementary information related to figure 4. Figure 5S display the  $^7\text{Be}$  growth trend at all 62 stations in 2003, 2011 and 2019. Displayed dataset has not been corrected from cosmic ray.

80



- 81 In 2003 the concentration at midlatitude is below average, in 2011 mid-latitudes concentrations rise above average while concentrations decrease at the equator. These results are consistent with re-analysis of  
 82 radio-sonde measurement which show tropopause increase at the mid latitudes while a decrease along the ITCZ.
- 83 In 2019 the <sup>7</sup>Be growth rate is increasing globally with the exception of a few locations.

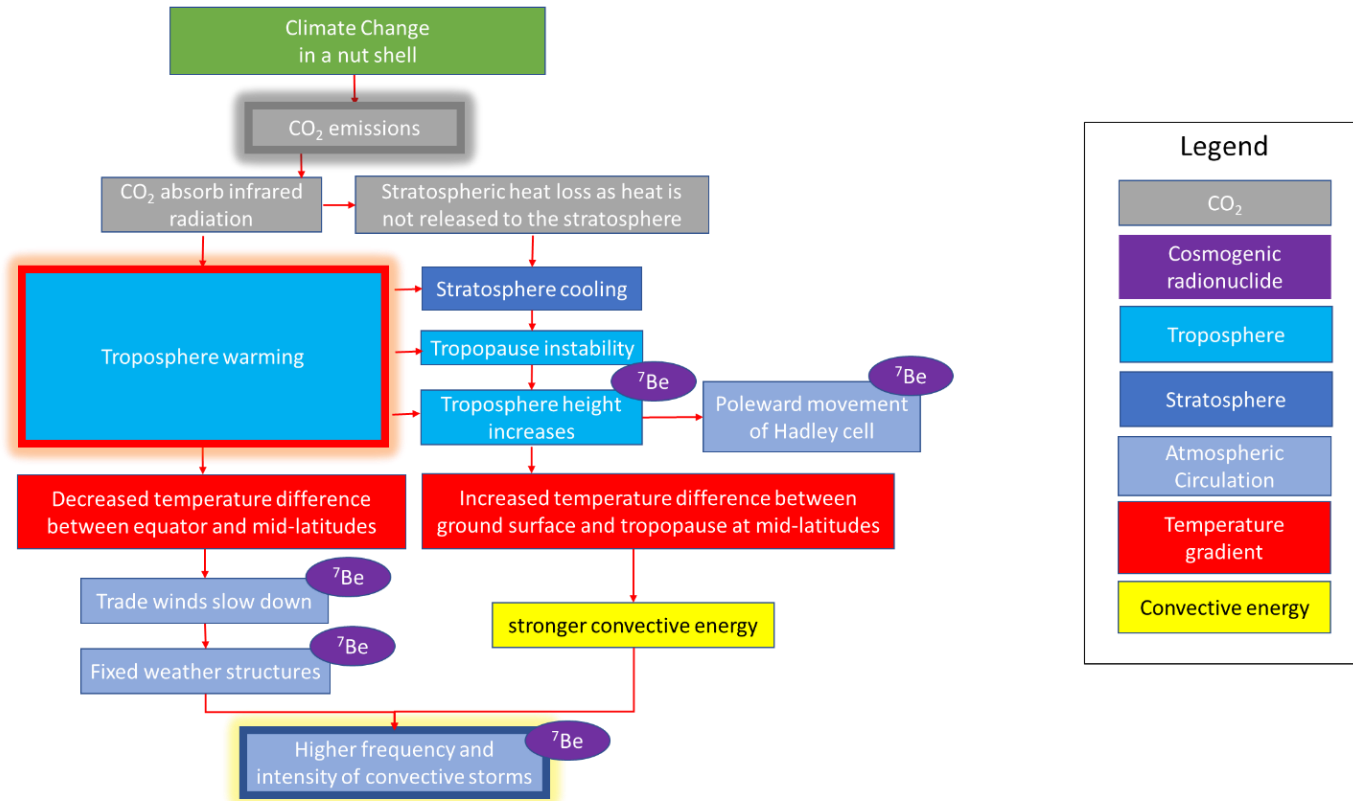

- 84
- 85 Figure S7. Flow chart showing the connection between CO<sub>2</sub> emissions to climate change patterns and the use of beryllium-7 as a proxy.
- 86

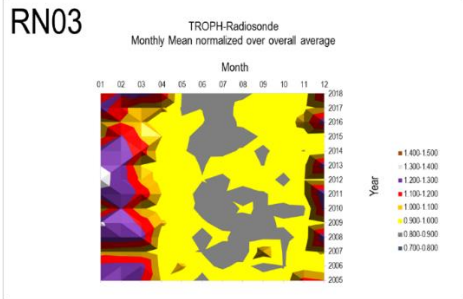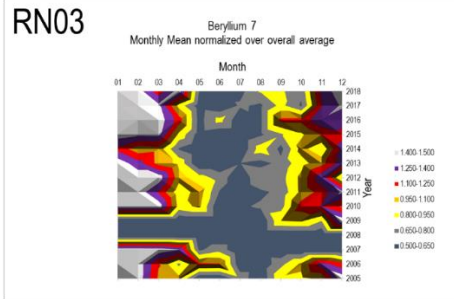

|             |      |      |      |      |      |      |      |      |      |      |      |      |      |      |
|-------------|------|------|------|------|------|------|------|------|------|------|------|------|------|------|
| Year        | 2005 | 2006 | 2007 | 2008 | 2009 | 2010 | 2011 | 2012 | 2013 | 2014 | 2015 | 2016 | 2017 | 2018 |
| Correlation | 0.80 | 0.71 | 0.94 | -    | 0.87 | 0.55 | 0.92 | 0.78 | 0.89 | 0.61 | 0.84 | 0.68 | 0.84 | 0.80 |

87

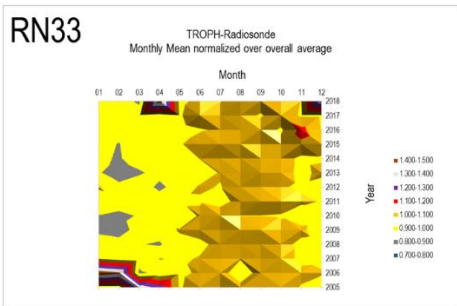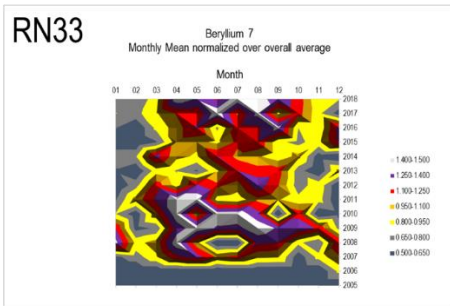

|             |       |       |      |      |       |      |      |      |      |      |      |      |
|-------------|-------|-------|------|------|-------|------|------|------|------|------|------|------|
| Year        | 2007  | 2008  | 2009 | 2010 | 2011  | 2012 | 2013 | 2014 | 2015 | 2016 | 2017 | 2018 |
| Correlation | -0.11 | -0.21 | 0.72 | 0.79 | -0.09 | 0.17 | 0.64 | 0.14 | 0.78 | 0.39 | 0.70 | 0.23 |

88

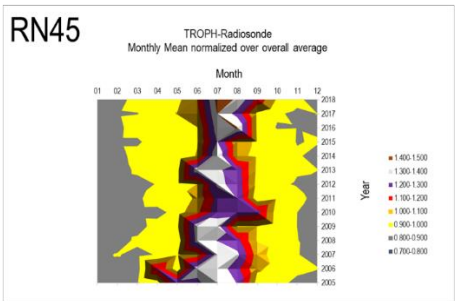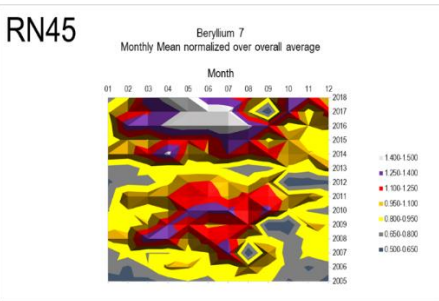

|             |      |      |      |      |      |      |      |      |       |      |      |      |      |      |
|-------------|------|------|------|------|------|------|------|------|-------|------|------|------|------|------|
| Year        | 2005 | 2006 | 2007 | 2008 | 2009 | 2010 | 2011 | 2012 | 2013  | 2014 | 2015 | 2016 | 2017 | 2018 |
| Correlation | 0.80 | 0.61 | 0.23 | 0.28 | 0.39 | 0.80 | 0.41 | 0.47 | -0.24 | 0.44 | 0.72 | 0.57 | 0.47 | 0.19 |

89

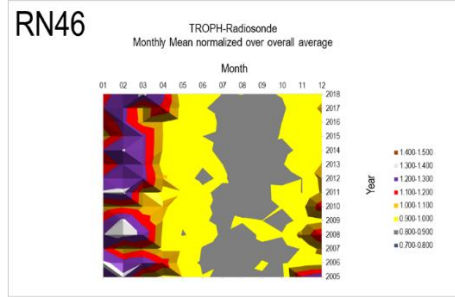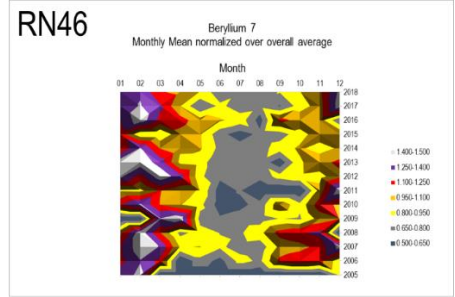

| Year        | 2006 | 2007 | 2008 | 2009 | 2010 | 2011 | 2012 | 2013 | 2014 | 2015 | 2016 | 2017 | 2018 |
|-------------|------|------|------|------|------|------|------|------|------|------|------|------|------|
| Correlation | 0.39 | 0.67 | 0.57 | 0.82 | 0.63 | 0.13 | 0.89 | 0.88 | 0.88 | 0.23 | 0.76 | 0.71 | 0.62 |

90

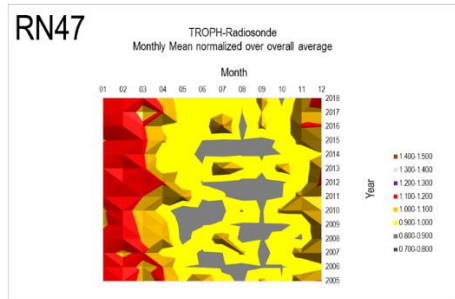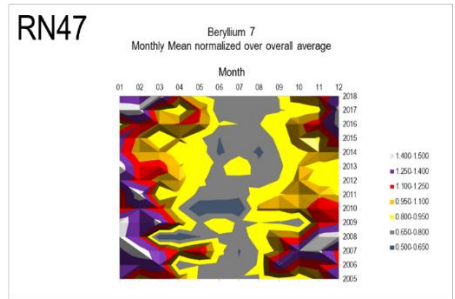

| Year        | 2005 | 2006 | 2007 | 2008 | 2009 | 2010 | 2011 | 2012 | 2013 | 2014 | 2015 | 2016 | 2017 | 2018 |
|-------------|------|------|------|------|------|------|------|------|------|------|------|------|------|------|
| Correlation | 0.62 | 0.37 | 0.61 | 0.49 | 0.82 | 0.92 | 0.43 | 0.74 | 0.66 | 0.77 | 0.60 | 0.39 | 0.71 | 0.77 |

91

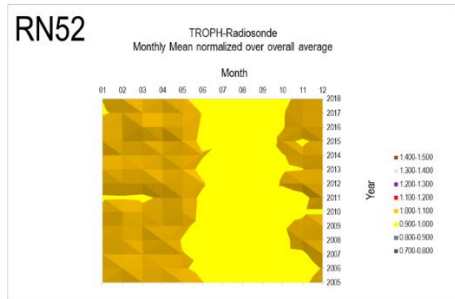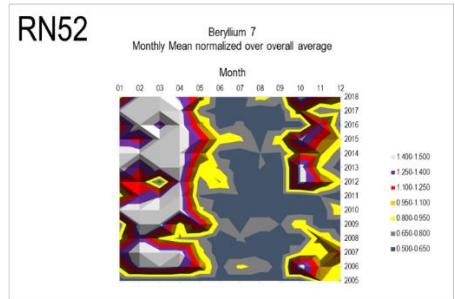

| Year        | 2006 | 2007 | 2008 | 2009 | 2010 | 2011 | 2012 | 2013 | 2014 | 2015 | 2016 | 2017 | 2018 |
|-------------|------|------|------|------|------|------|------|------|------|------|------|------|------|
| Correlation | 0.44 | 0.69 | 0.72 | 0.70 | 0.77 | 0.27 | 0.57 | 0.66 | 0.47 | 0.51 | 0.72 | 0.38 | 0.61 |

92

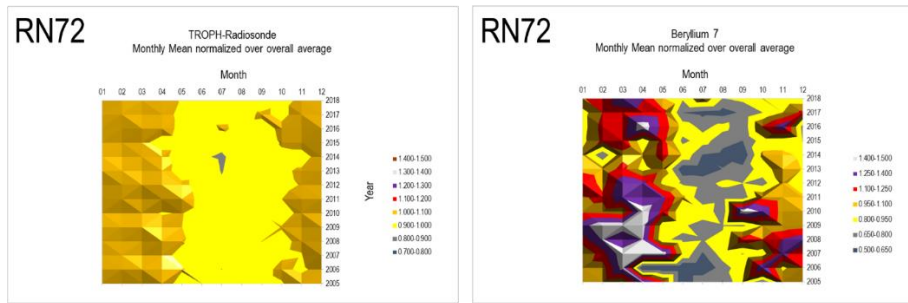

| Year        | 2005 | 2006 | 2007 | 2008 | 2009 | 2010 | 2011 | 2012 | 2013 | 2014 | 2015 | 2016 | 2017 | 2018 |
|-------------|------|------|------|------|------|------|------|------|------|------|------|------|------|------|
| Correlation | 0.53 | 0.63 | 0.49 | 0.86 | 0.85 | 0.16 | 0.77 | 0.84 | 0.71 | 0.43 | 0.44 | 0.25 | 0.66 | 0.55 |

93

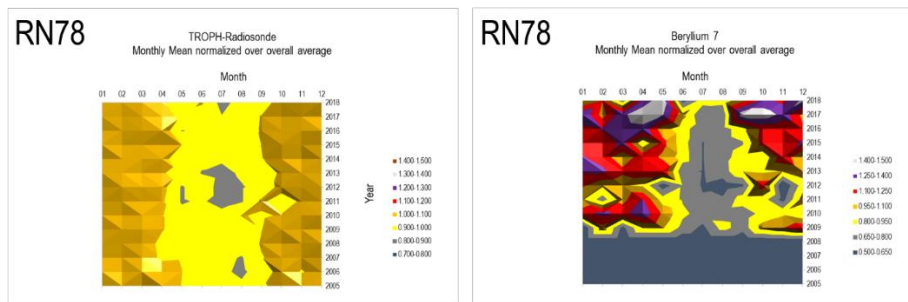

| Year        | 2009 | 2010 | 2011 | 2012 | 2013 | 2014 | 2015 | 2016 | 2017 | 2018 |
|-------------|------|------|------|------|------|------|------|------|------|------|
| Correlation | 0.33 | 0.33 | 0.45 | 0.86 | 0.80 | 0.53 | 0.84 | 0.82 | 0.57 | 0.18 |

94

95 Figure S8 shows examples of IMS station locations from all regions of the worlds where we compared tropopause profile with be7 data. Tropopause profile is built with GPS-  
 96 RO yearly average data (left plot) and be7 yearly averaged data (right plot). GPS-RO data GPS coordinates to IMS stations locations. GPS-RO are retrieved temperature profiles  
 97 generated by satellites. All available years are plotted. The coloured scale is based on normalised data obtained by dividing absolute values with the overall timeseries  
 98 average. The correlation between GPS-RO data and Be7 trend is highest at the mid latitudes, where we have correlation up to 0.8. About 1/3 of stations (about 20 stations) have  
 99 a good correlation, 1/3 of station with low correlation and 1/3 with no correlation. We expected a higher n. of station with higher correlation rate but the low rate may be due to  
 100 Be7 dataset which needs to be corrected for wash out effect. The correlation is lowest at equatorial and polar latitudes (maybe also related to wash out effect or the low  
 101 transport) but also site specific due to local weather pattern therefore further research is needed. The comparative scale is built on the ratio of absolute monthly tropopause  
 102 height (based on GPS-RO data) versus absolute monthly Be7 values. The average ratio is between 3 and 6, lower at the mid latitudes and highest (6) at the equator where the  
 103 height of tropopause is the highest and the wash out effect is stronger. The uncertainty of the ratio value (standard deviation) is low at the mid latitudes (which is good) and  
 104 increases at the equator and at the very high latitudes, those areas where be7 is most affected by wash out.

105 Supplementary Formulas

106

107 **Formula S1.** (1) Mean calculation and (2) normalized mean calculation used for data processing. Where  $x^i$  is the  $^7\text{Be}$  activity concentration recorded each day [ $\mu\text{Bq}/\text{m}^3$ ].  $N$  is the number of days for which the mean is  
108 calculated: 0/-120 for the presented method.  $M$  is the calculated mean.  $\bar{x}$  is the overall averaged activity concentration of  $^7\text{Be}$  [ $\mu\text{Bq}/\text{m}^3$ ] measured at each location: 2003-2019 for all listed IMS Station.  $N(M)$  is the  
109 calculated normalized mean.

110

111 1 
$$M = \frac{1}{n} * \sum_{i=1}^n x^i$$

112

113 2 
$$N(M) = \frac{1}{\bar{x}} * \frac{1}{n} * \sum_{i=1}^n x^i$$
