# Supplementary material for: Radioisotopes demonstrate changes in global atmospheric circulation possibly caused by global warming
Source: PubMed Central journal article supplement (PMC7329870; doi:10.1038/s41598-020-66541-5), 2020-07-01
Supplement: 41598_2020_66541_MOESM3_ESM.pdf [file 41598_2020_66541_MOESM3_ESM.pdf]

# **Title: Radioisotopes demonstrate changes in global atmospheric circulation possibly caused by global warming**

**Authors:** Lucrezia Terzi<sup>a,b\*</sup>, Gerhard Wotawa<sup>c</sup>, Michael Schoeppner<sup>d,e</sup>, Martin Kalinowski<sup>d</sup>, Paul R.J. Saey<sup>b</sup>, Philipp Steinmann<sup>f</sup>, Lan Luan<sup>g</sup> and Paul W. Staten<sup>g</sup>.

**Affiliations:** <sup>a</sup>Belgian Nuclear Research Centre (SCK•CEN), Mol, Belgium; <sup>b</sup>Technische Universität Wien, Atominstitut, Austria; <sup>c</sup>Zentralanstalt für Meteorologie und Geodynamik (ZAMG), Vienna, Austria, <sup>d</sup>Provisional Technical Secretariat, Preparatory Commission for the Nuclear-Test-Ban Treaty Organization, International Data Centre, Vienna, Austria; <sup>e</sup>Institute of Safety/Security and Risk Sciences, Vienna, Austria; <sup>f</sup>Federal Office of Public Health (BAG), Bern, Switzerland; <sup>g</sup>Indiana University Bloomington, Bloomington, Indiana, USA.

## **\*Corresponding Author:**

Lucrezia Terzi

Ph: +43 6644553833

e-mail: [lucrezia.terzi@sckcen.be](mailto:lucrezia.terzi@sckcen.be)

<sup>a</sup> SCK•CEN, Belgium Nuclear Research Centre,  
Boeretang 200, 2400 Mol, Belgium.

<sup>b</sup> Technische Universität Wien, Atominstitut,  
Stadionallee 2, 1020 Wien, Austria.

# <sup>7</sup>Be normalized trend interpolated into a global map

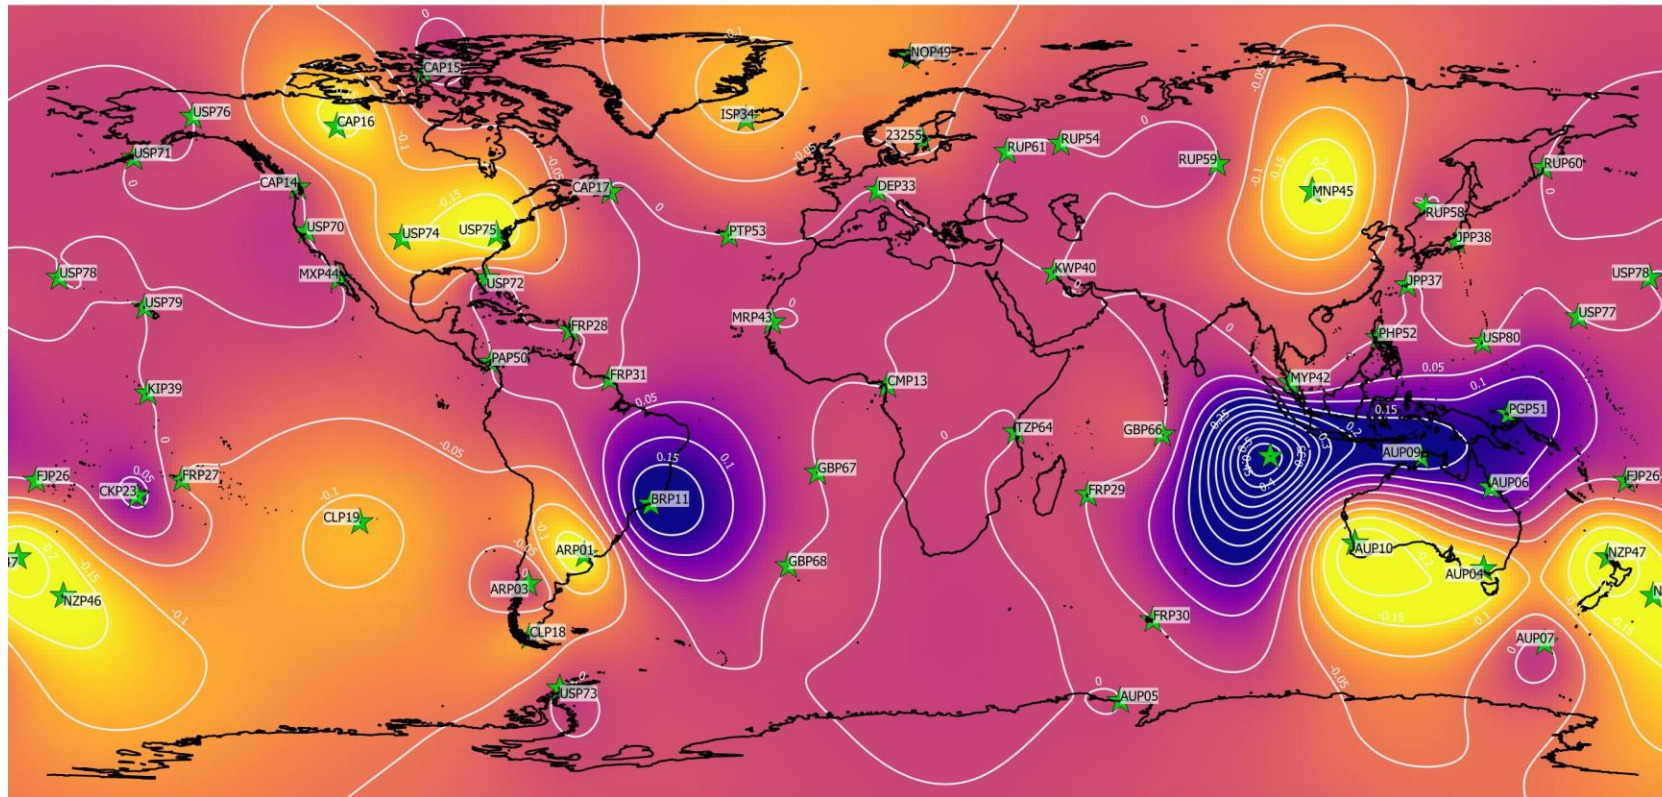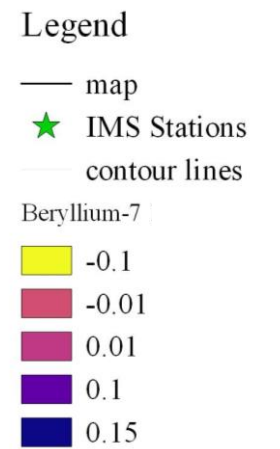

2003

Map executed with QGIS.  
QGIS Development Team (2019). QGIS Geographic  
Information System. Open Source Geospatial Foundation  
Project. <http://qgis.osgeo.org>.

# $^7\text{Be}$ normalized trend interpolated into a global map

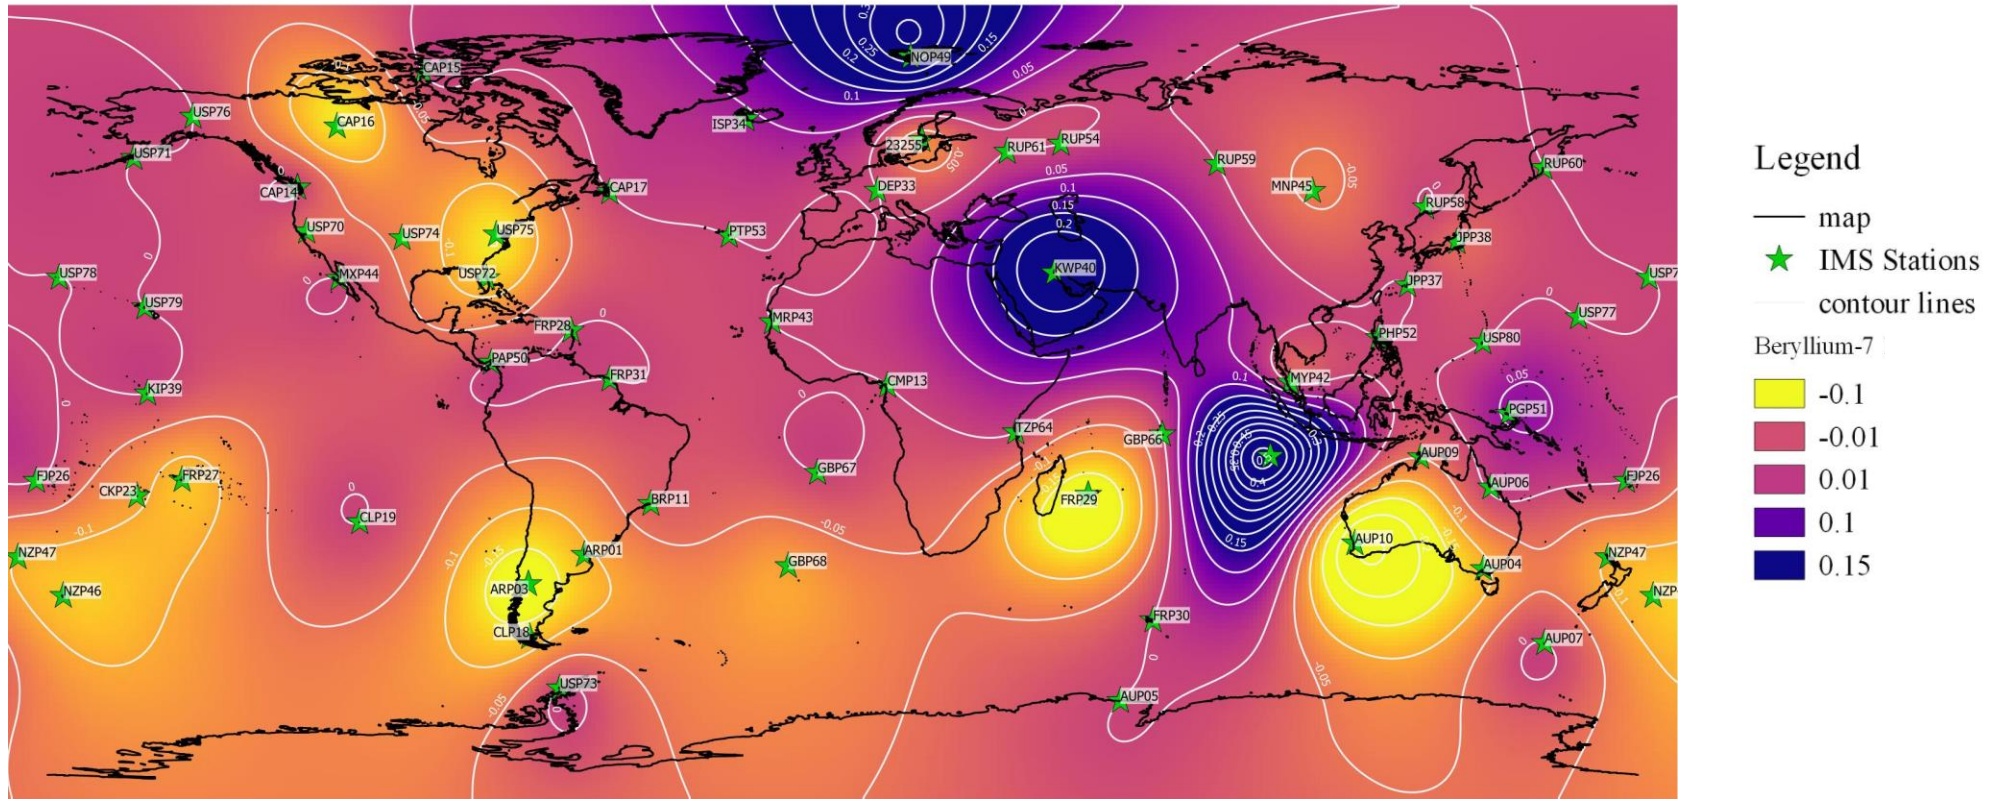

2004

Map executed with QGIS.  
QGIS Development Team (2019). QGIS Geographic  
Information System. Open Source Geospatial Foundation  
Project. <http://qgis.osgeo.org>.

# $^7\text{Be}$ normalized trend interpolated into a global map

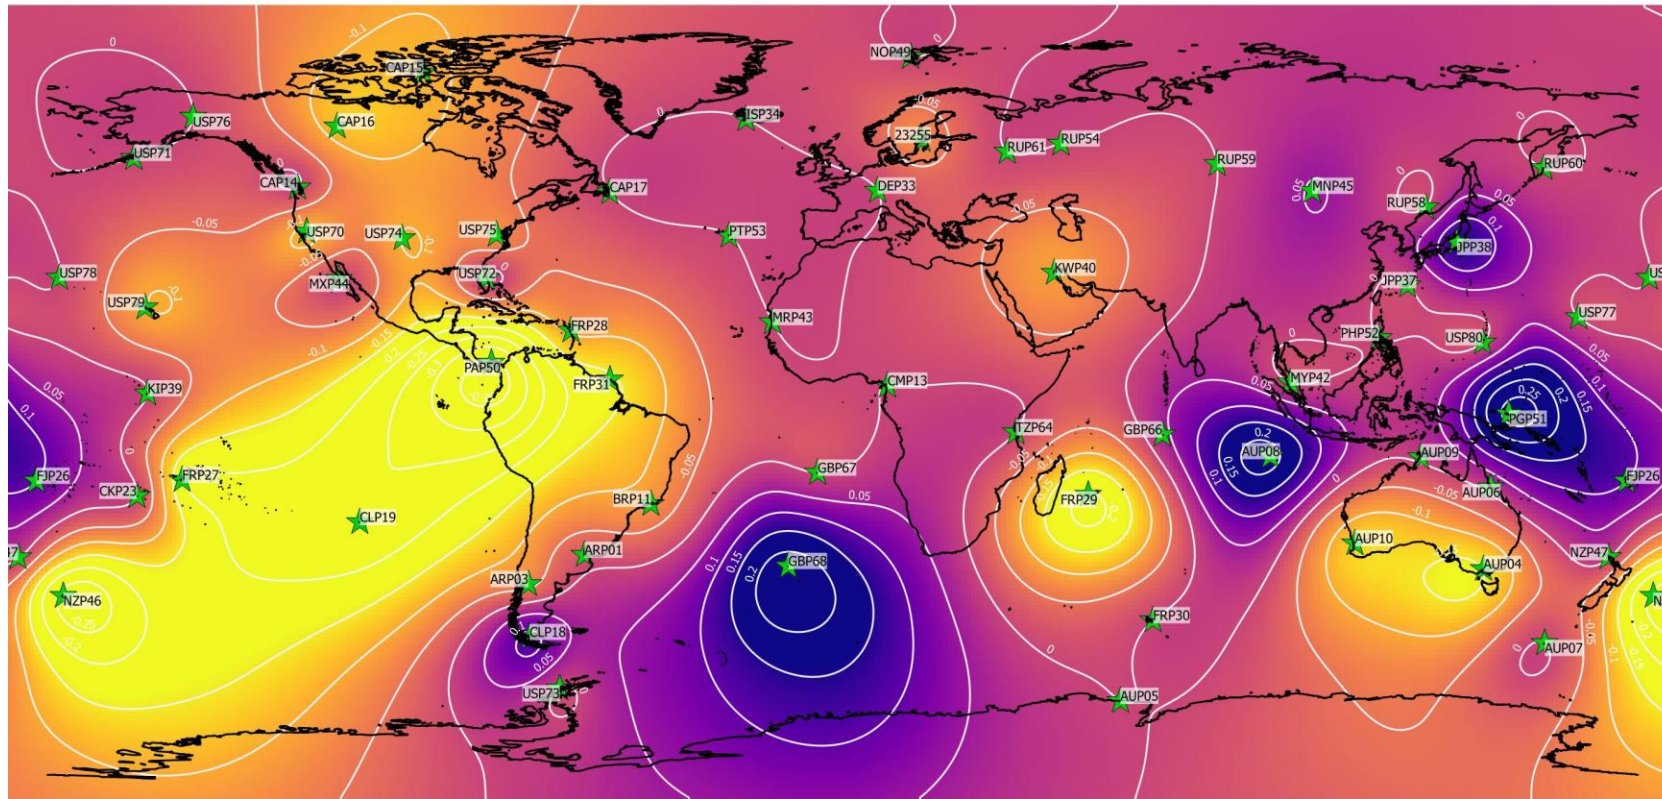

2005

Map executed with QGIS.  
QGIS Development Team (2019). QGIS Geographic  
Information System. Open Source Geospatial Foundation  
Project. <http://qgis.osgeo.org>.

# $^7\text{Be}$ normalized trend interpolated into a global map

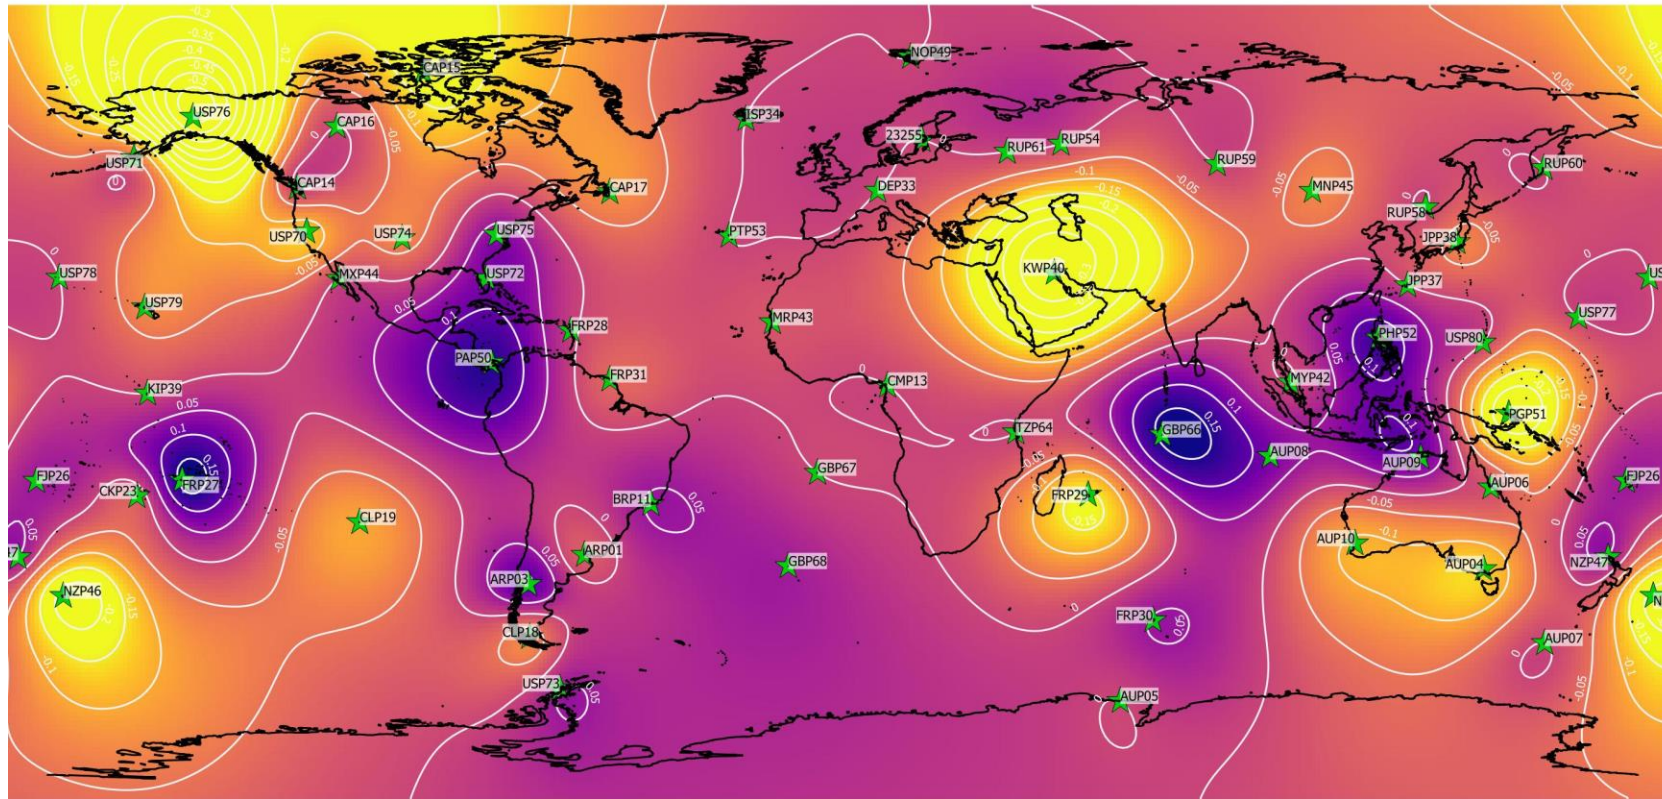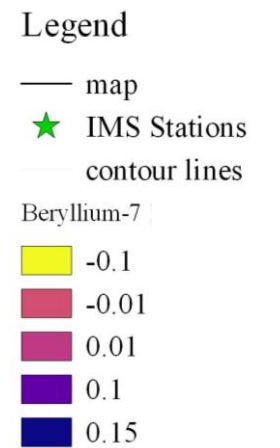

2006

Map executed with QGIS.  
QGIS Development Team (2019). QGIS Geographic  
Information System. Open Source Geospatial Foundation  
Project. <http://qgis.osgeo.org>.

# $^7\text{Be}$ normalized trend interpolated into a global map

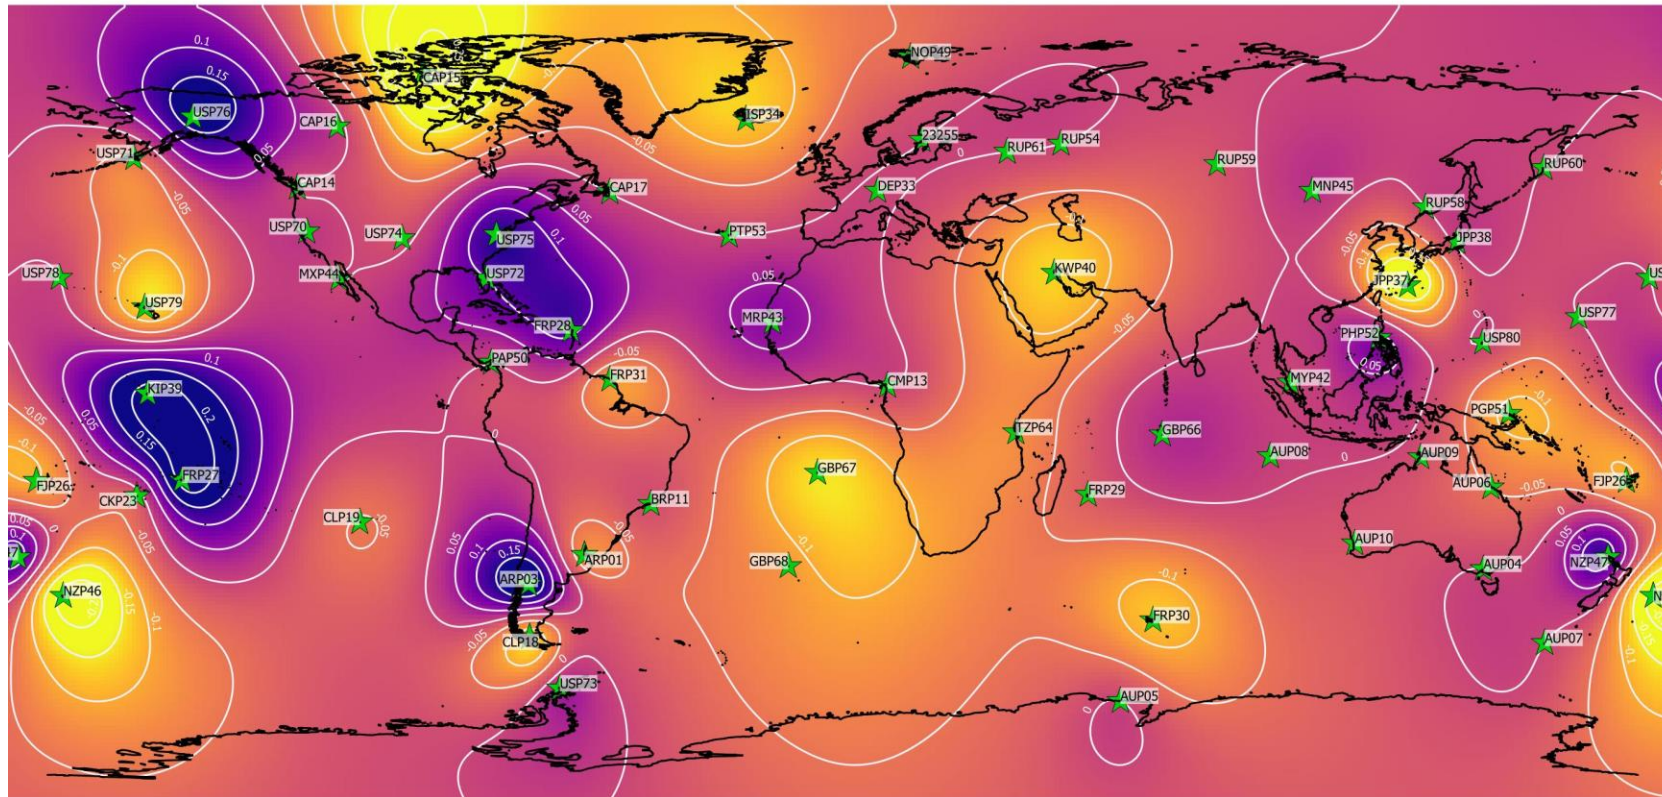

2007

Map executed with QGIS.  
QGIS Development Team (2019). QGIS Geographic  
Information System. Open Source Geospatial Foundation  
Project. <http://qgis.osgeo.org>.

# <sup>7</sup>Be normalized trend interpolated into a global map

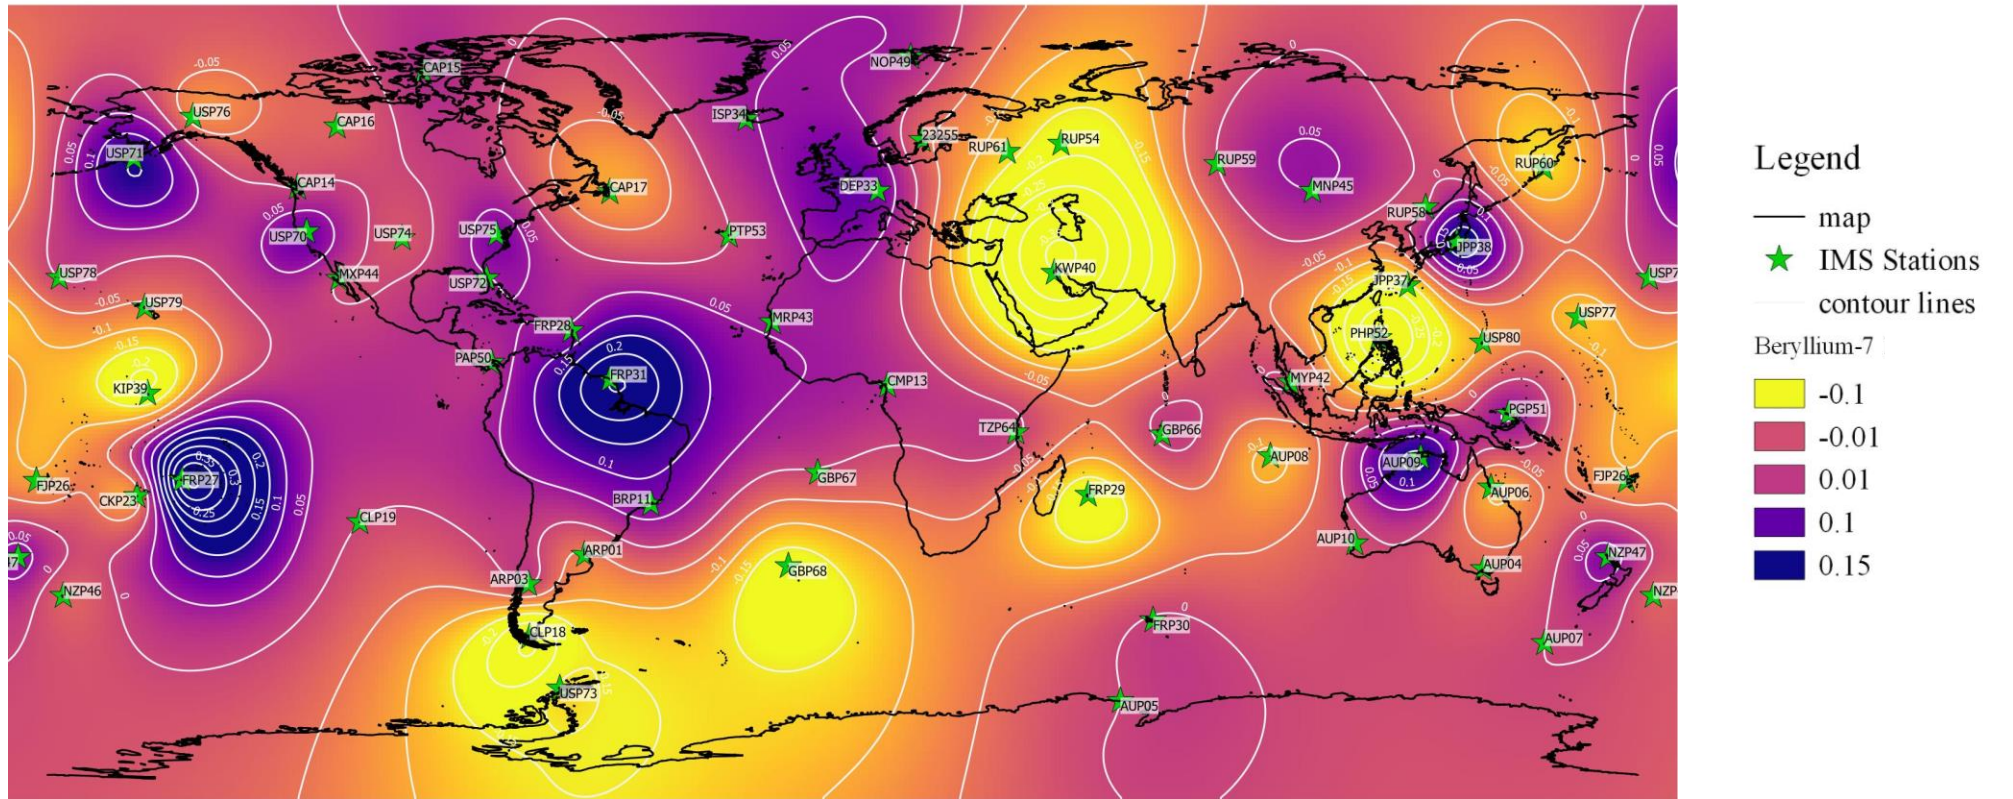

2008

Map executed with QGIS.  
QGIS Development Team (2019). QGIS Geographic  
Information System. Open Source Geospatial Foundation  
Project. <http://qgis.osgeo.org>.

# $^7\text{Be}$ normalized trend interpolated into a global map

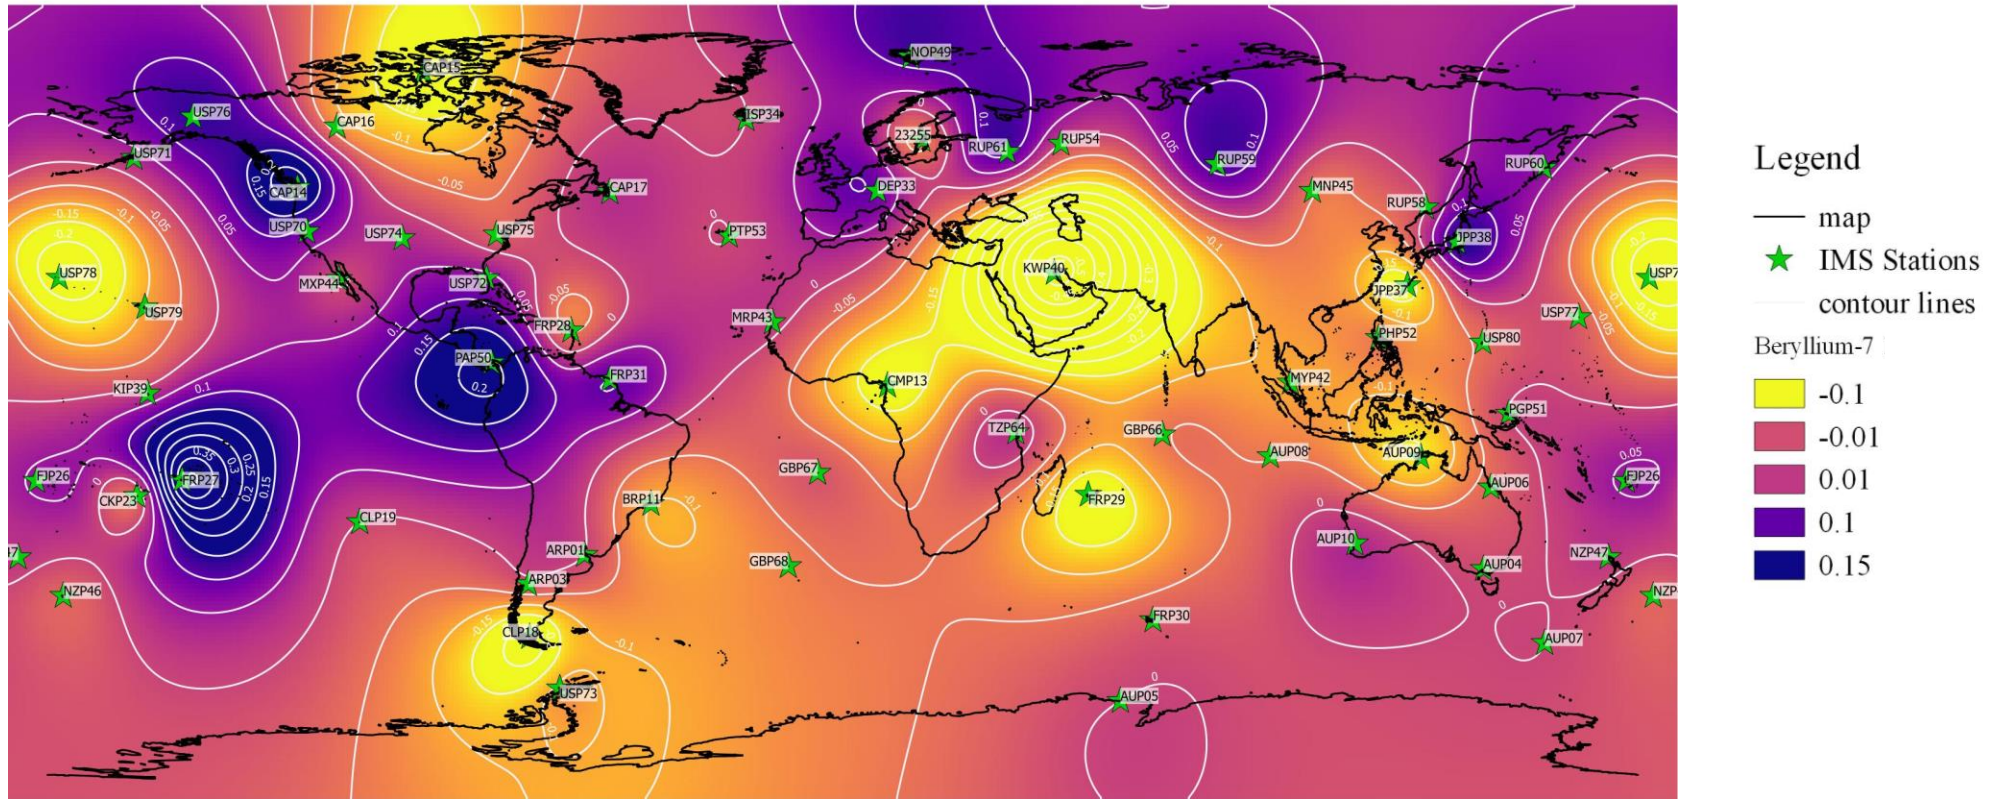

2009

Map executed with QGIS.  
QGIS Development Team (2019). QGIS Geographic  
Information System. Open Source Geospatial Foundation  
Project. <http://qgis.osgeo.org>.



# $^7\text{Be}$ normalized trend interpolated into a global map

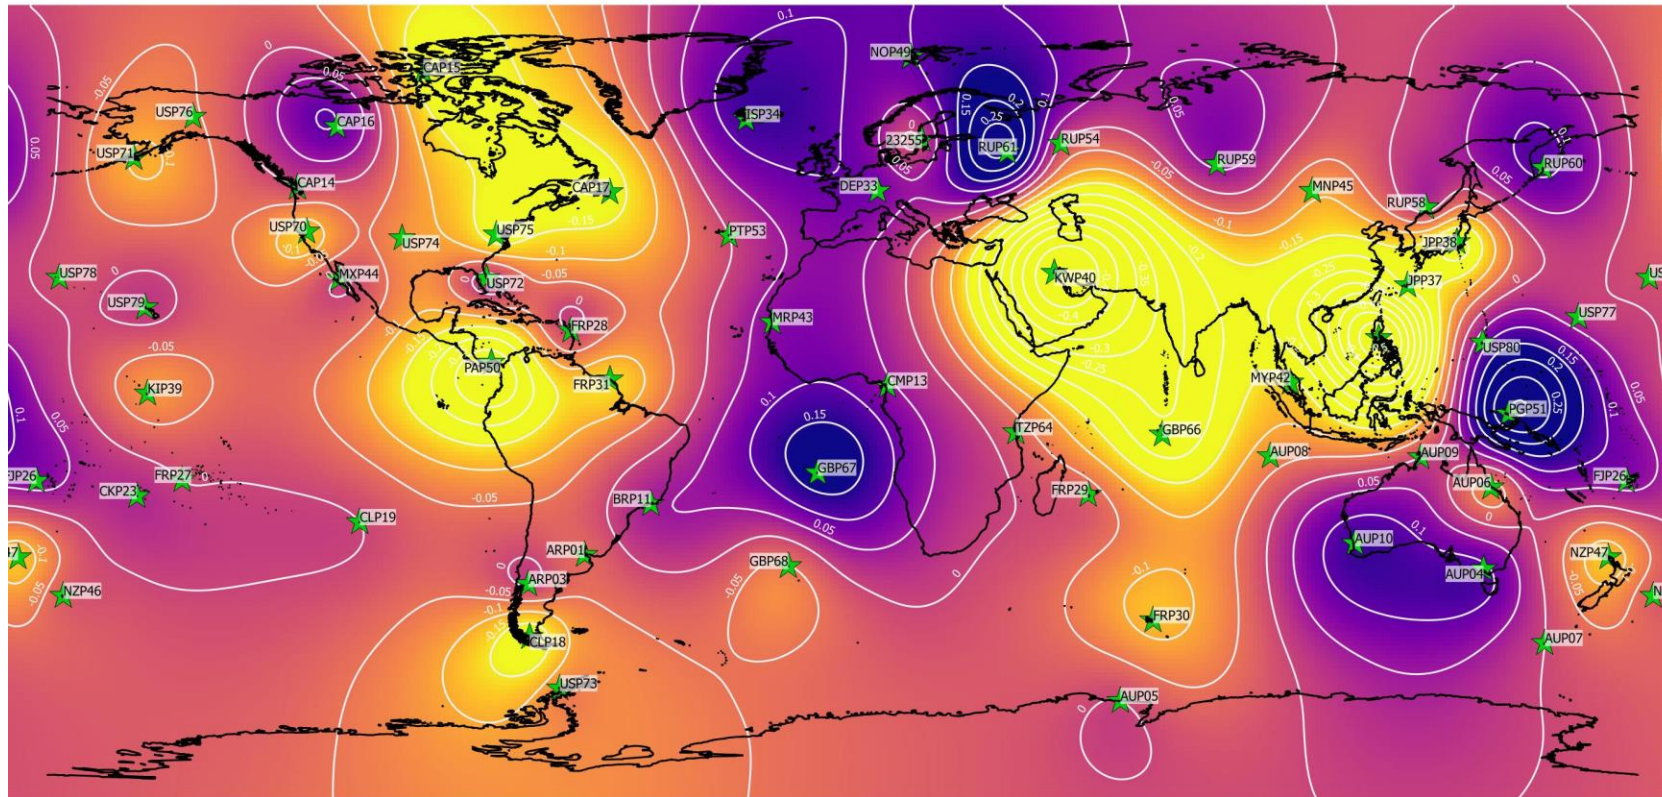

2010

Map executed with QGIS.  
QGIS Development Team (2019). QGIS Geographic  
Information System. Open Source Geospatial Foundation  
Project. <http://qgis.osgeo.org>.

# <sup>7</sup>Be normalized trend interpolated into a global map

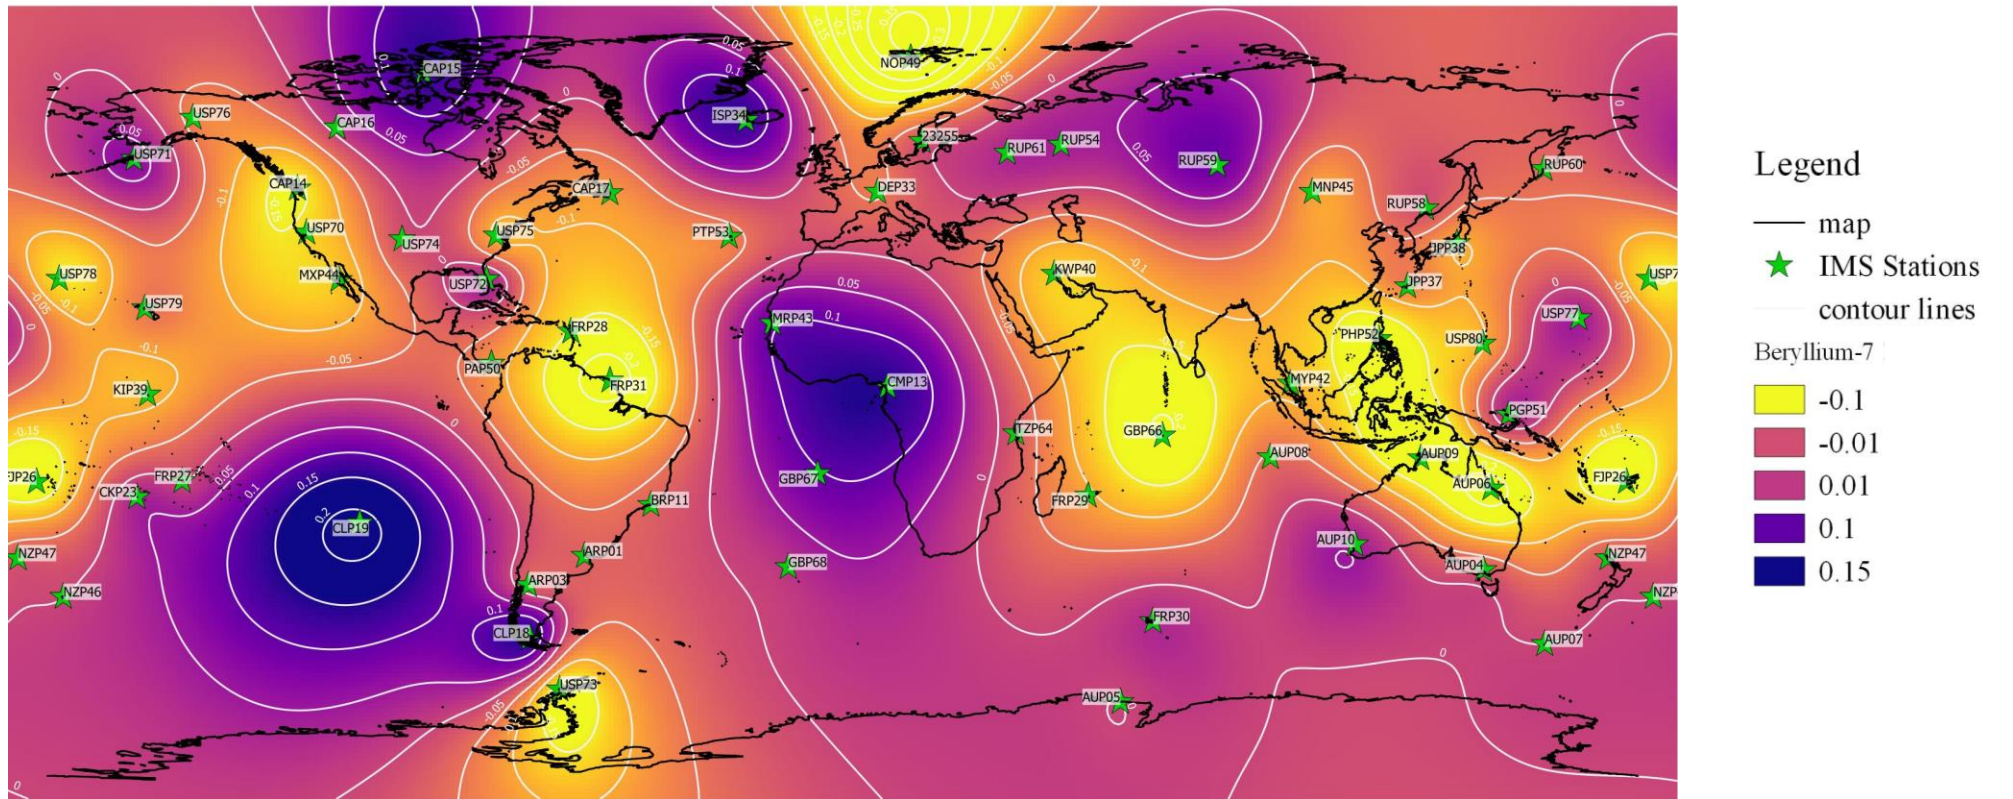

2011

Map executed with QGIS.  
QGIS Development Team (2019). QGIS Geographic  
Information System. Open Source Geospatial Foundation  
Project. <http://qgis.osgeo.org>.

## $^7\text{Be}$ normalized trend interpolated into a global map

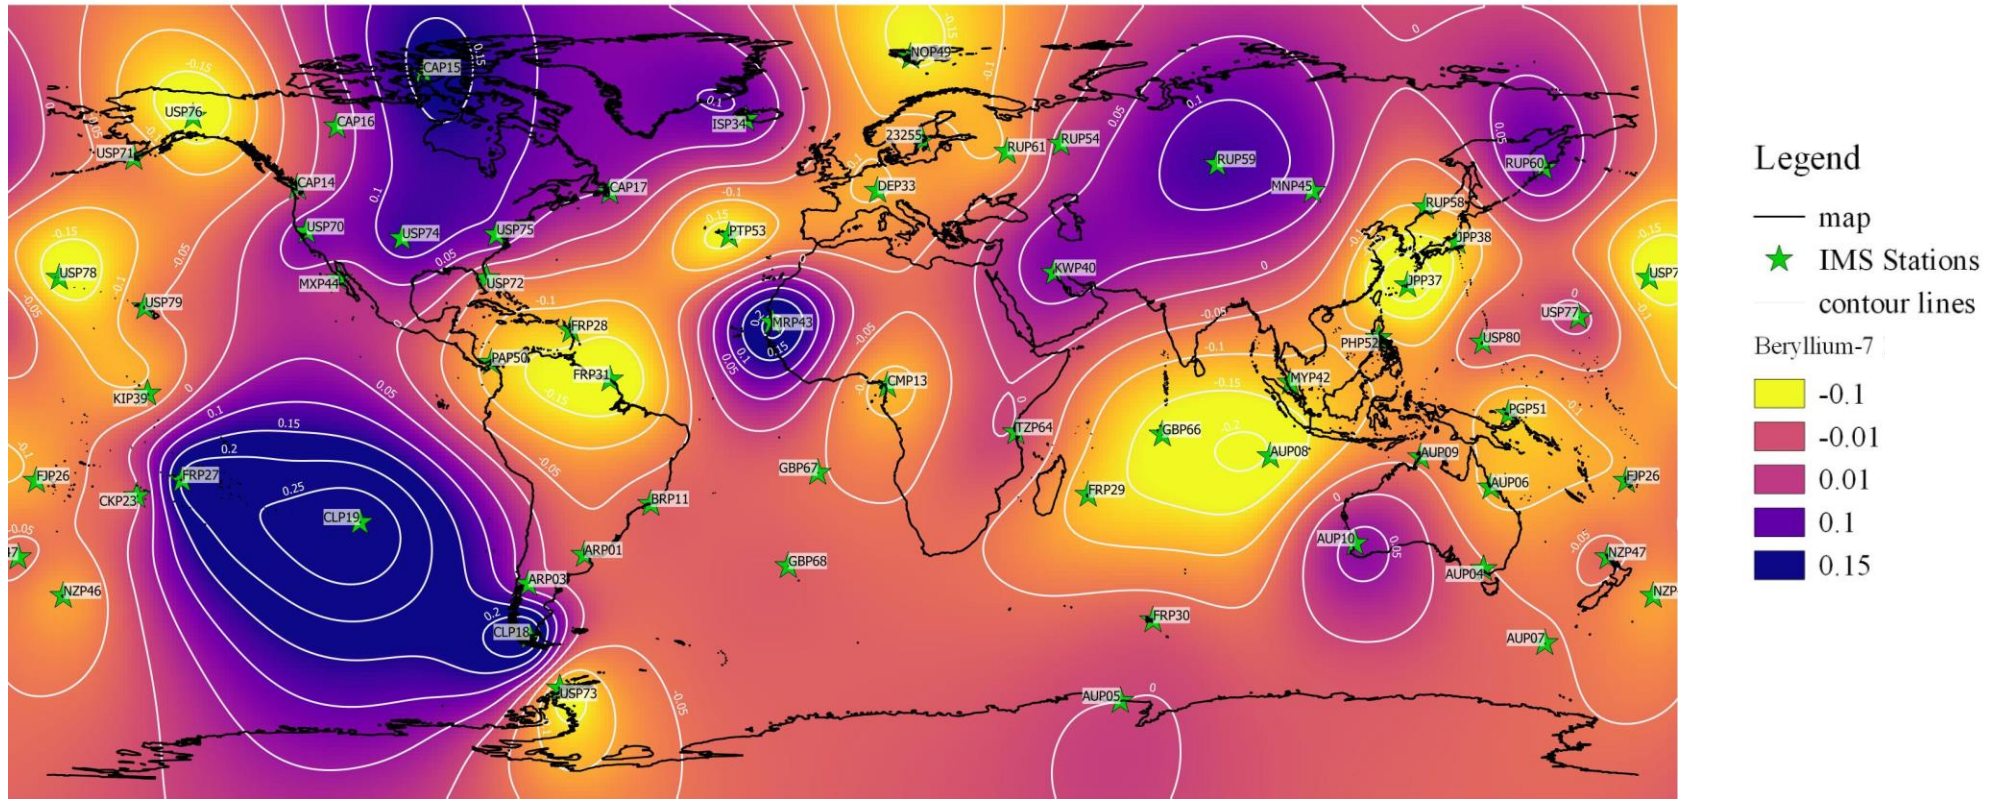

2012

Map executed with QGIS.  
QGIS Development Team (2019). QGIS Geographic  
Information System. Open Source Geospatial Foundation  
Project. <http://qgis.osgeo.org>.

# $^7\text{Be}$ normalized trend interpolated into a global map

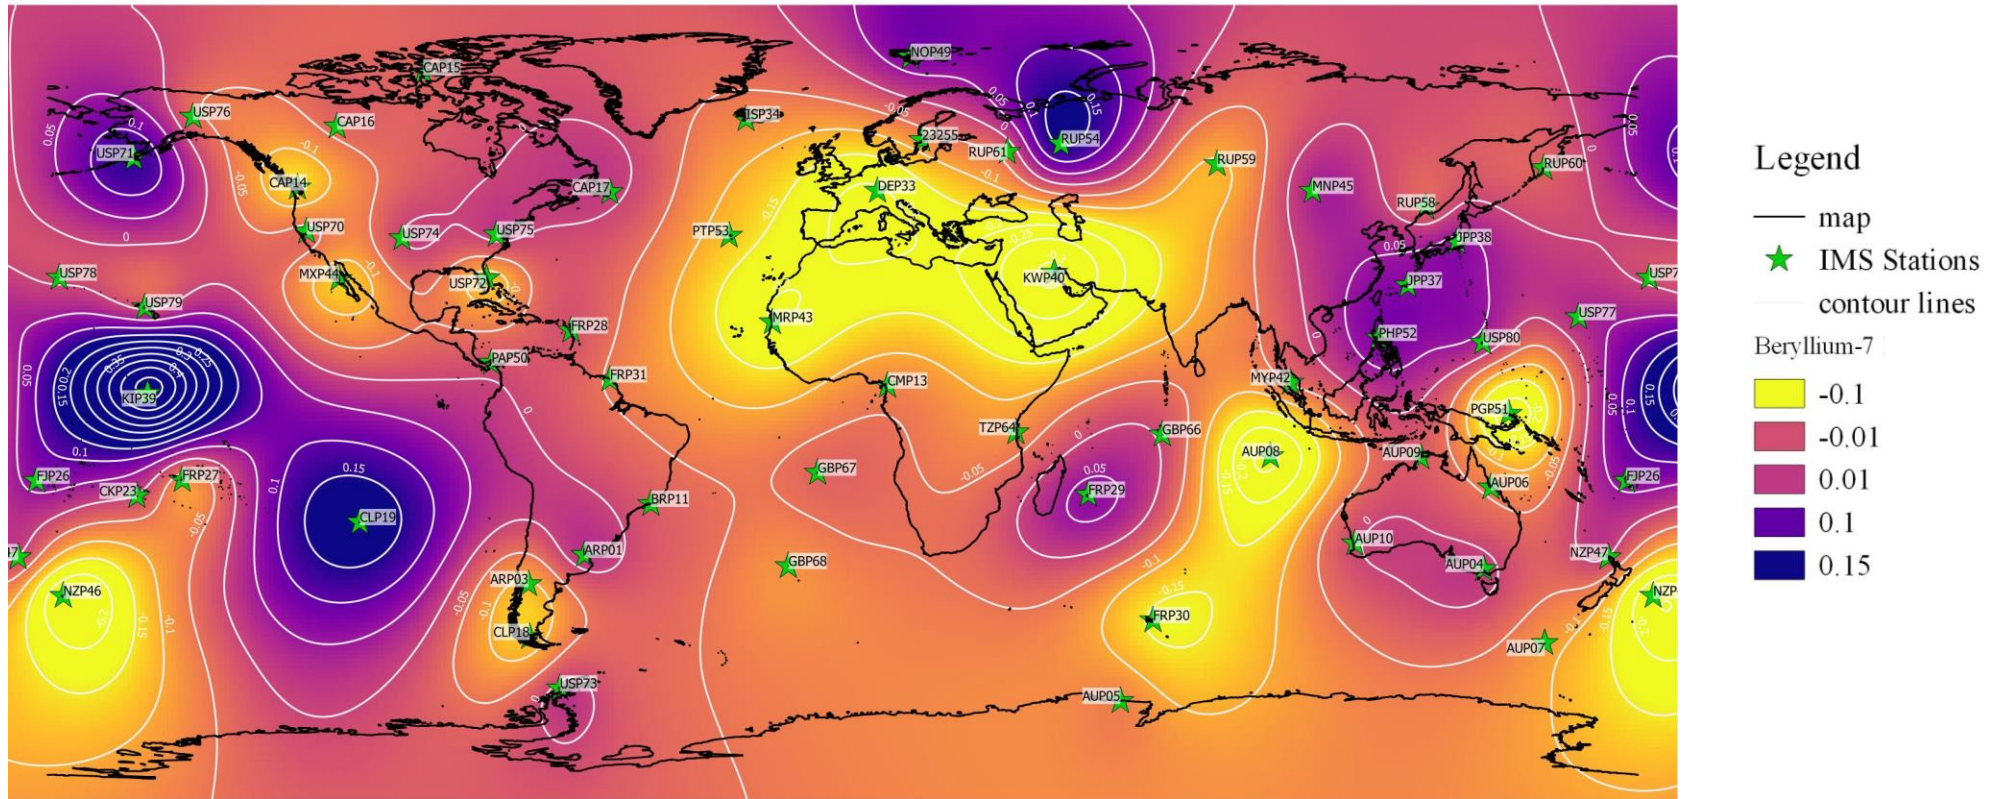

2013

Map executed with QGIS.  
QGIS Development Team (2019). QGIS Geographic  
Information System. Open Source Geospatial Foundation  
Project. <http://qgis.osgeo.org>.

# $^7\text{Be}$ normalized trend interpolated into a global map

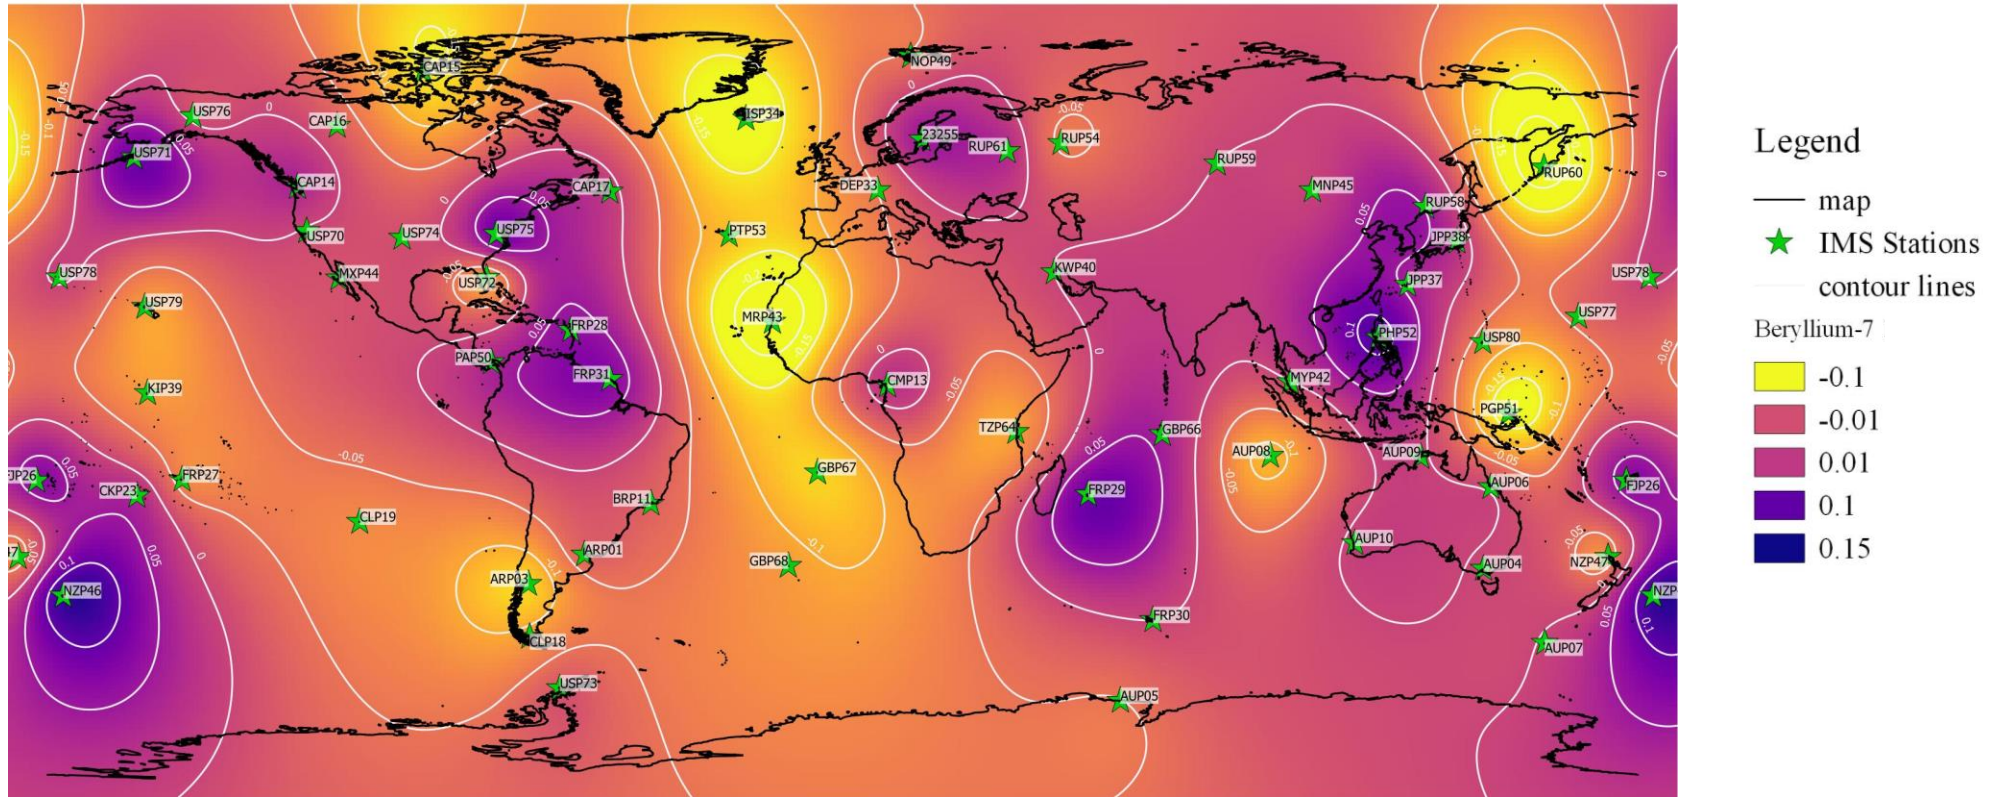

2014

Map executed with QGIS.  
QGIS Development Team (2019). QGIS Geographic  
Information System. Open Source Geospatial Foundation  
Project. <http://qgis.osgeo.org>.

# $^7\text{Be}$ normalized trend interpolated into a global map

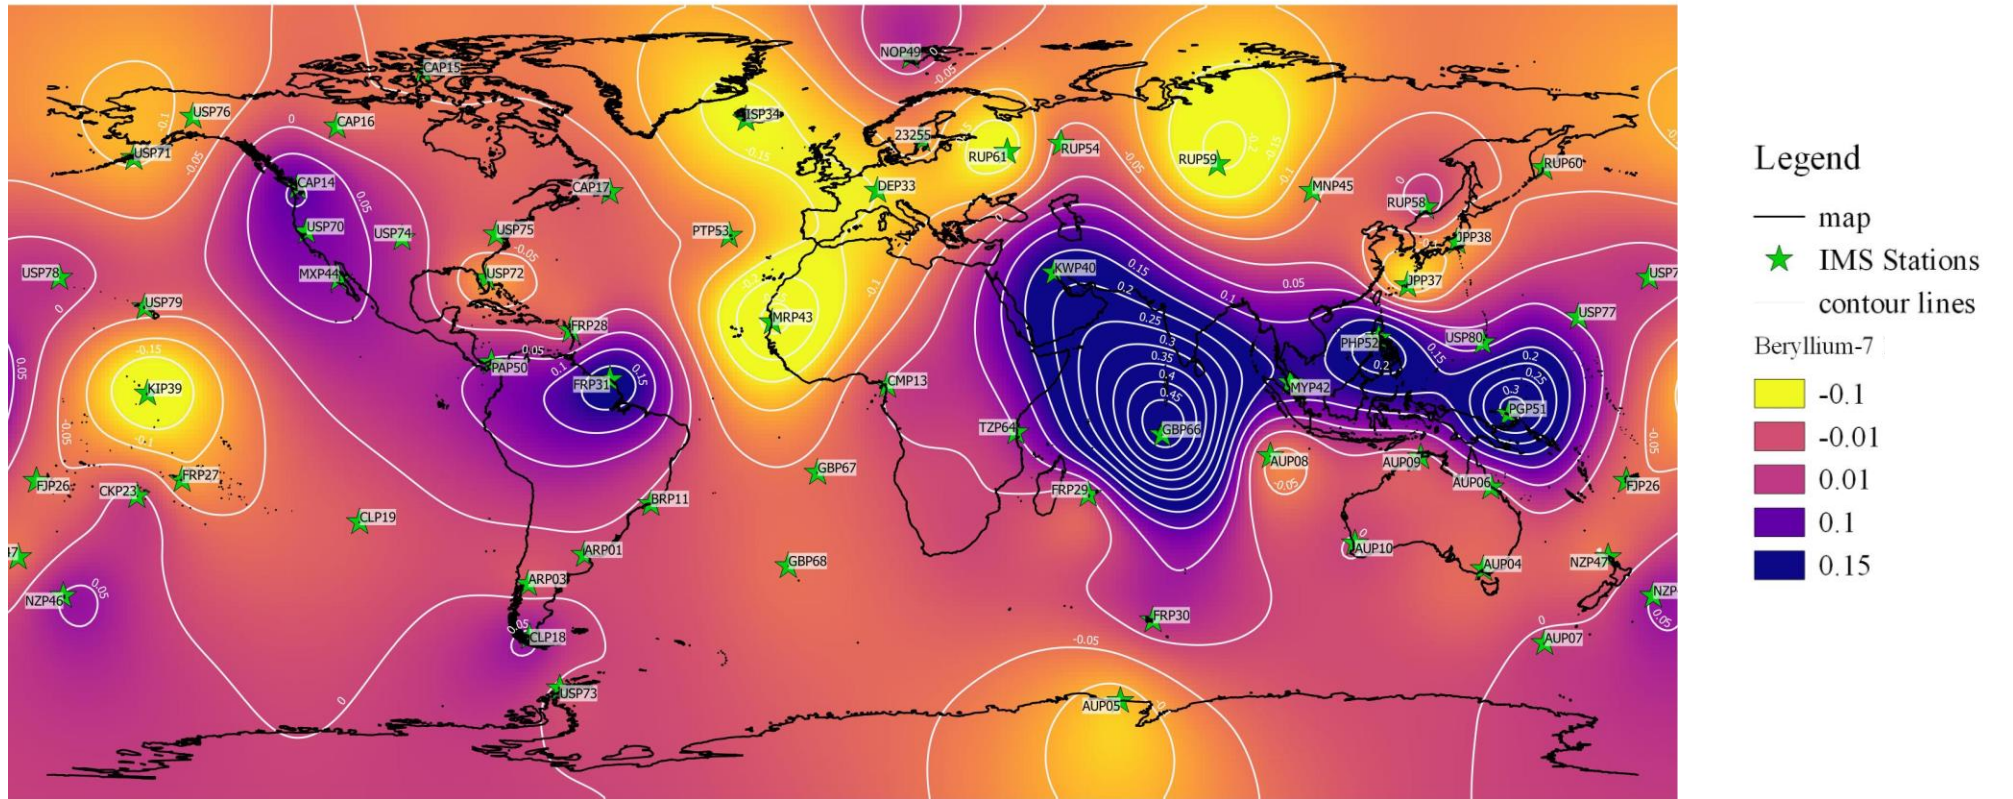

2015

Map executed with QGIS.  
QGIS Development Team (2019). QGIS Geographic  
Information System. Open Source Geospatial Foundation  
Project. <http://qgis.osgeo.org>.

## <sup>7</sup>Be normalized trend interpolated into a global map

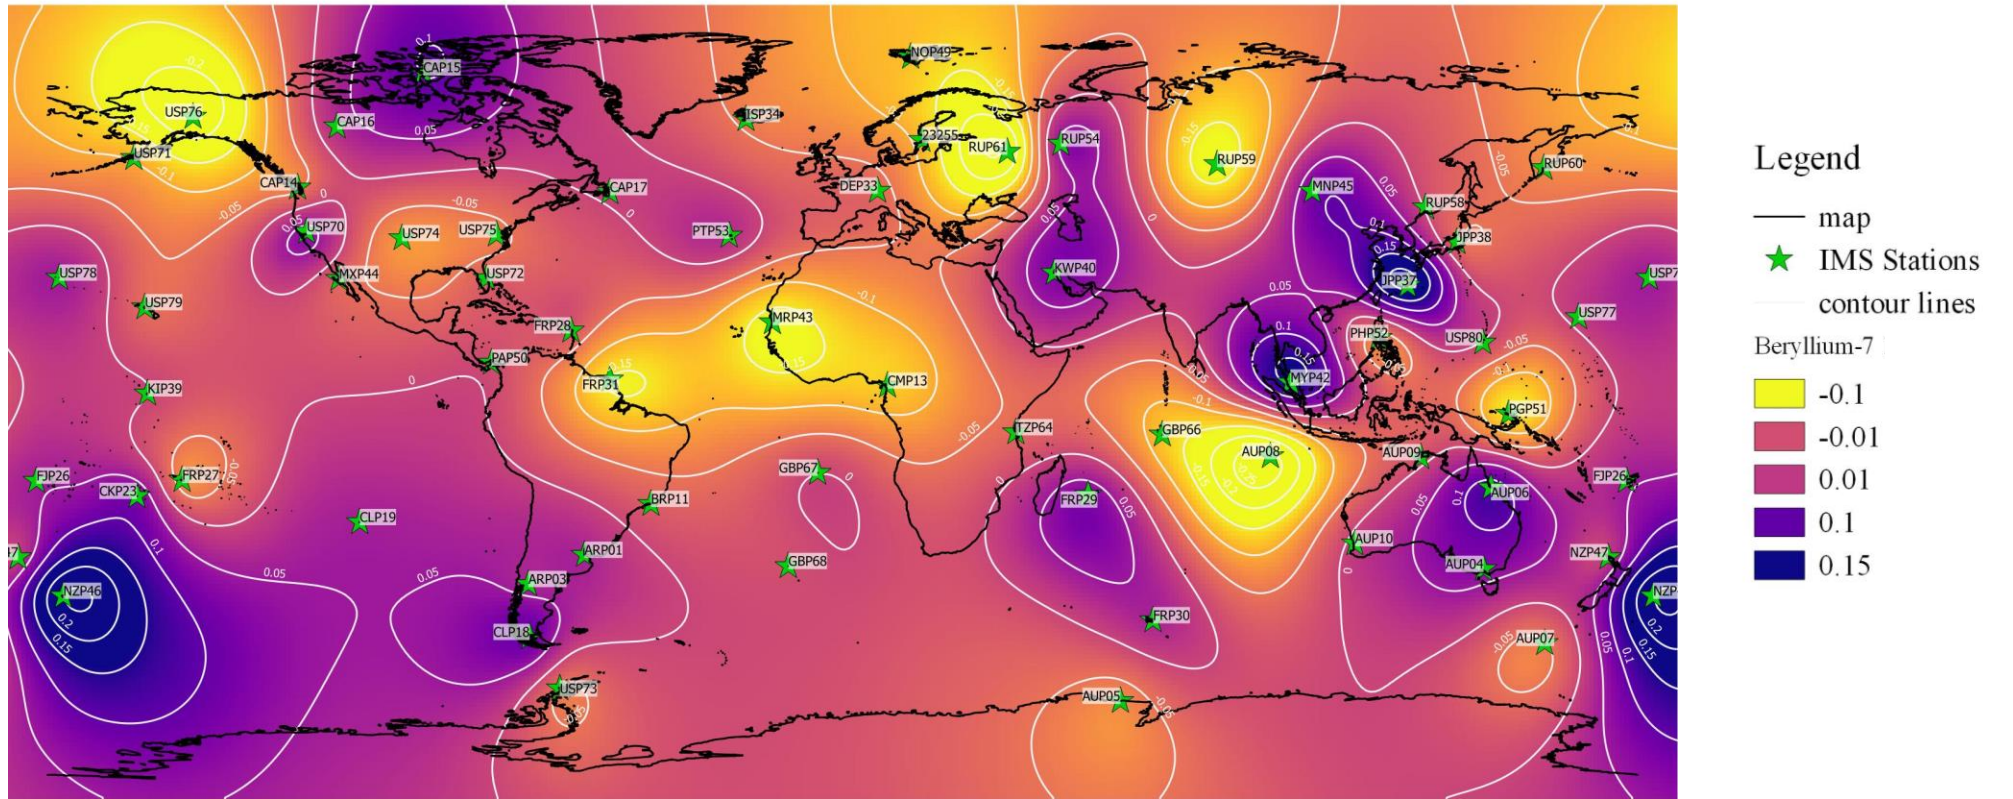

2016

Map executed with QGIS.  
QGIS Development Team (2019). QGIS Geographic  
Information System. Open Source Geospatial Foundation  
Project. <http://qgis.osgeo.org>.

# $^7\text{Be}$ normalized trend interpolated into a global map

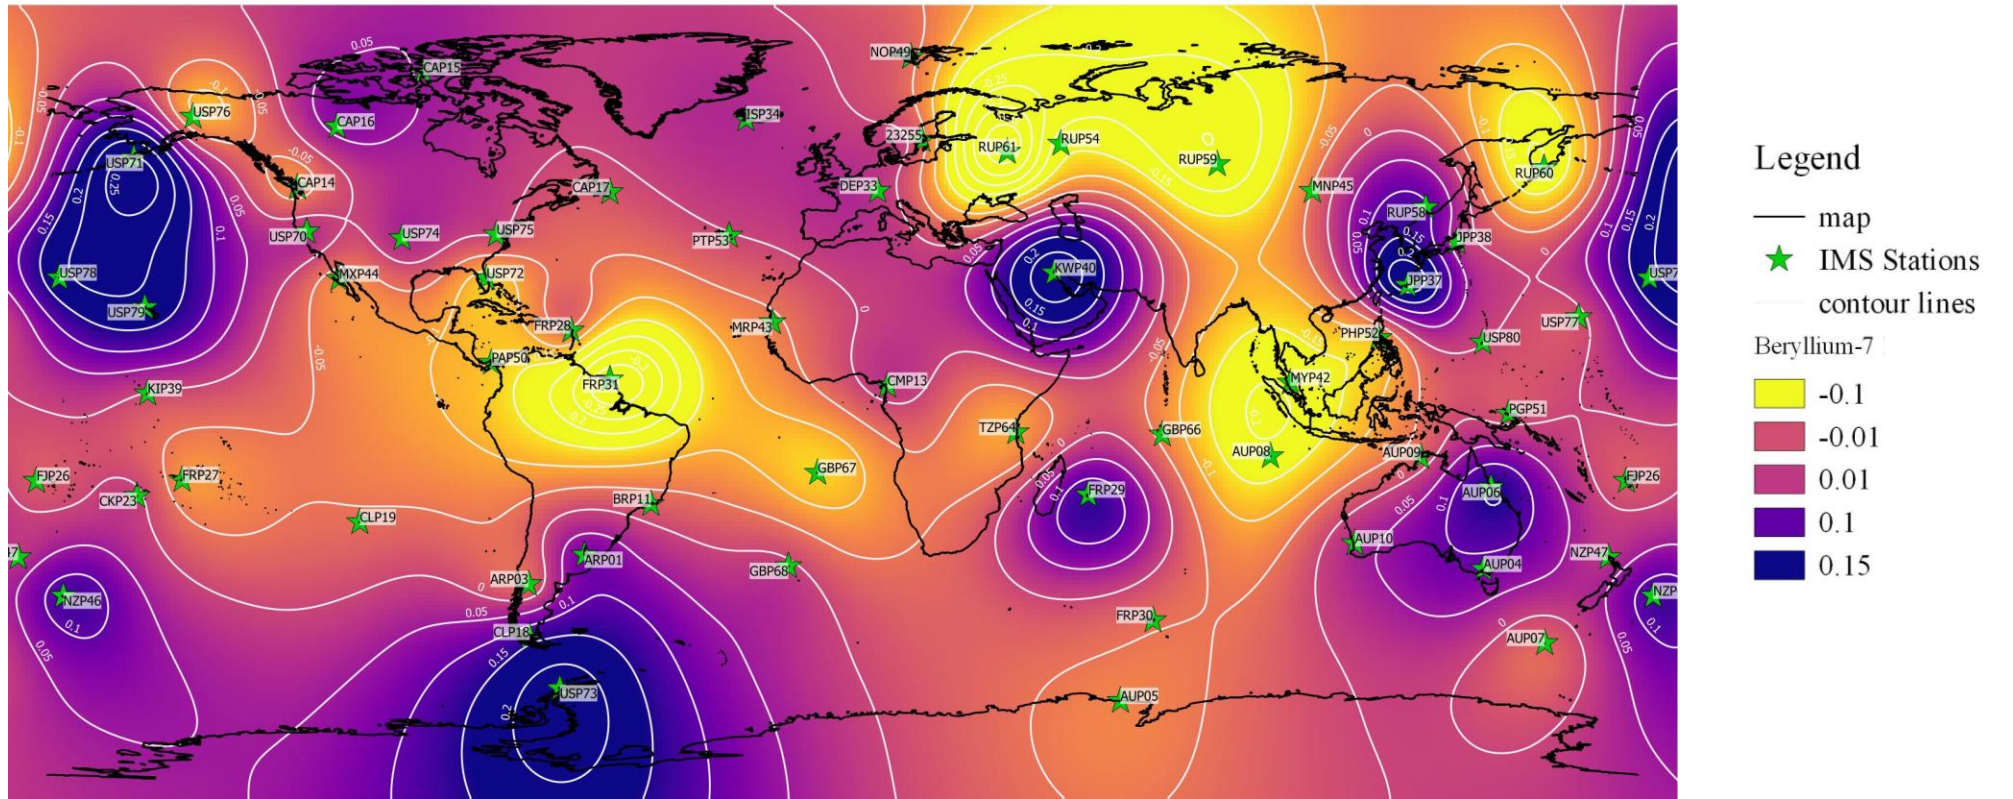

2017

Map executed with QGIS.  
QGIS Development Team (2019). QGIS Geographic  
Information System. Open Source Geospatial Foundation  
Project. <http://qgis.osgeo.org>.



# <sup>7</sup>Be normalized trend interpolated into a global map

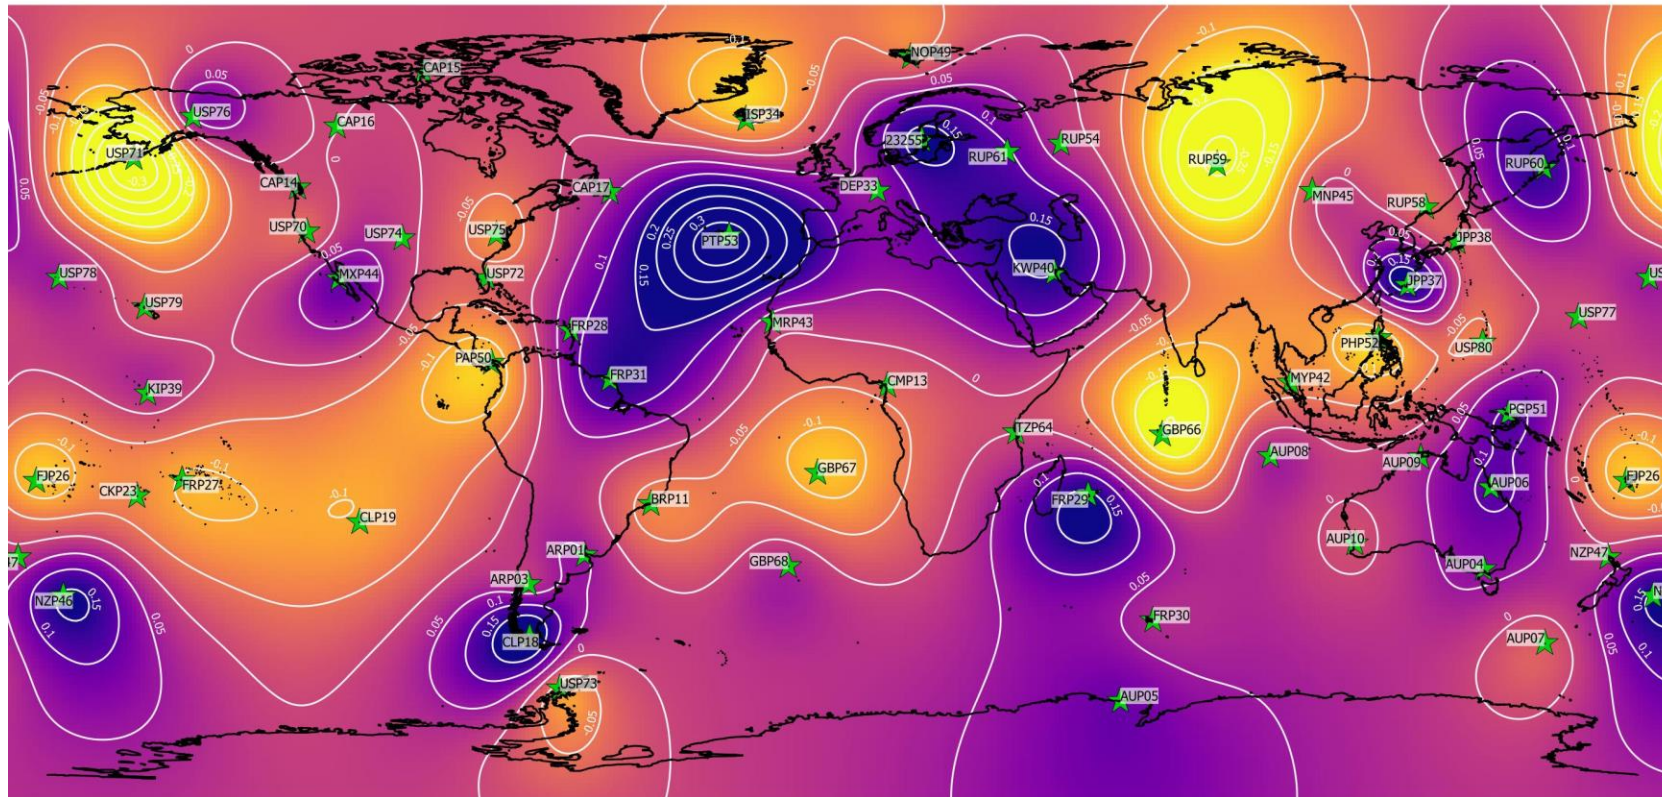

2018

Map executed with QGIS.  
QGIS Development Team (2019). QGIS Geographic  
Information System. Open Source Geospatial Foundation  
Project. <http://qgis.osgeo.org>.

# $^7\text{Be}$ normalized trend interpolated into a global map

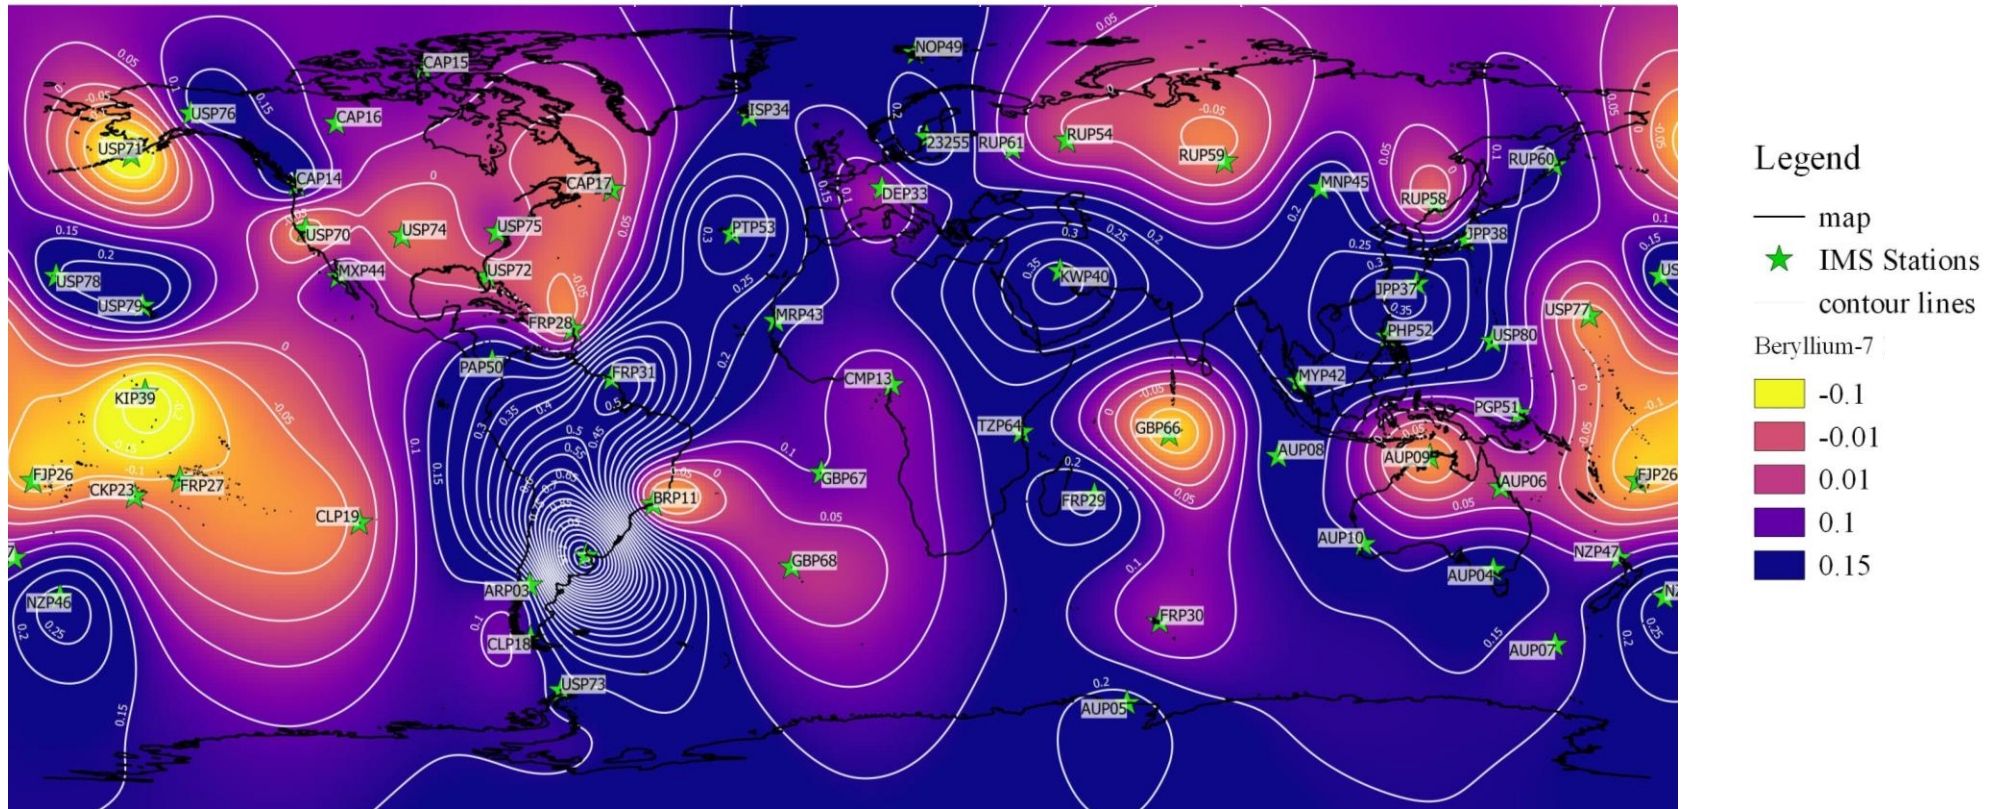

2019

Map executed with QGIS.  
QGIS Development Team (2019). QGIS Geographic  
Information System. Open Source Geospatial Foundation  
Project. <http://qgis.osgeo.org>.

# <sup>7</sup>Be normalized trend interpolated into a global map

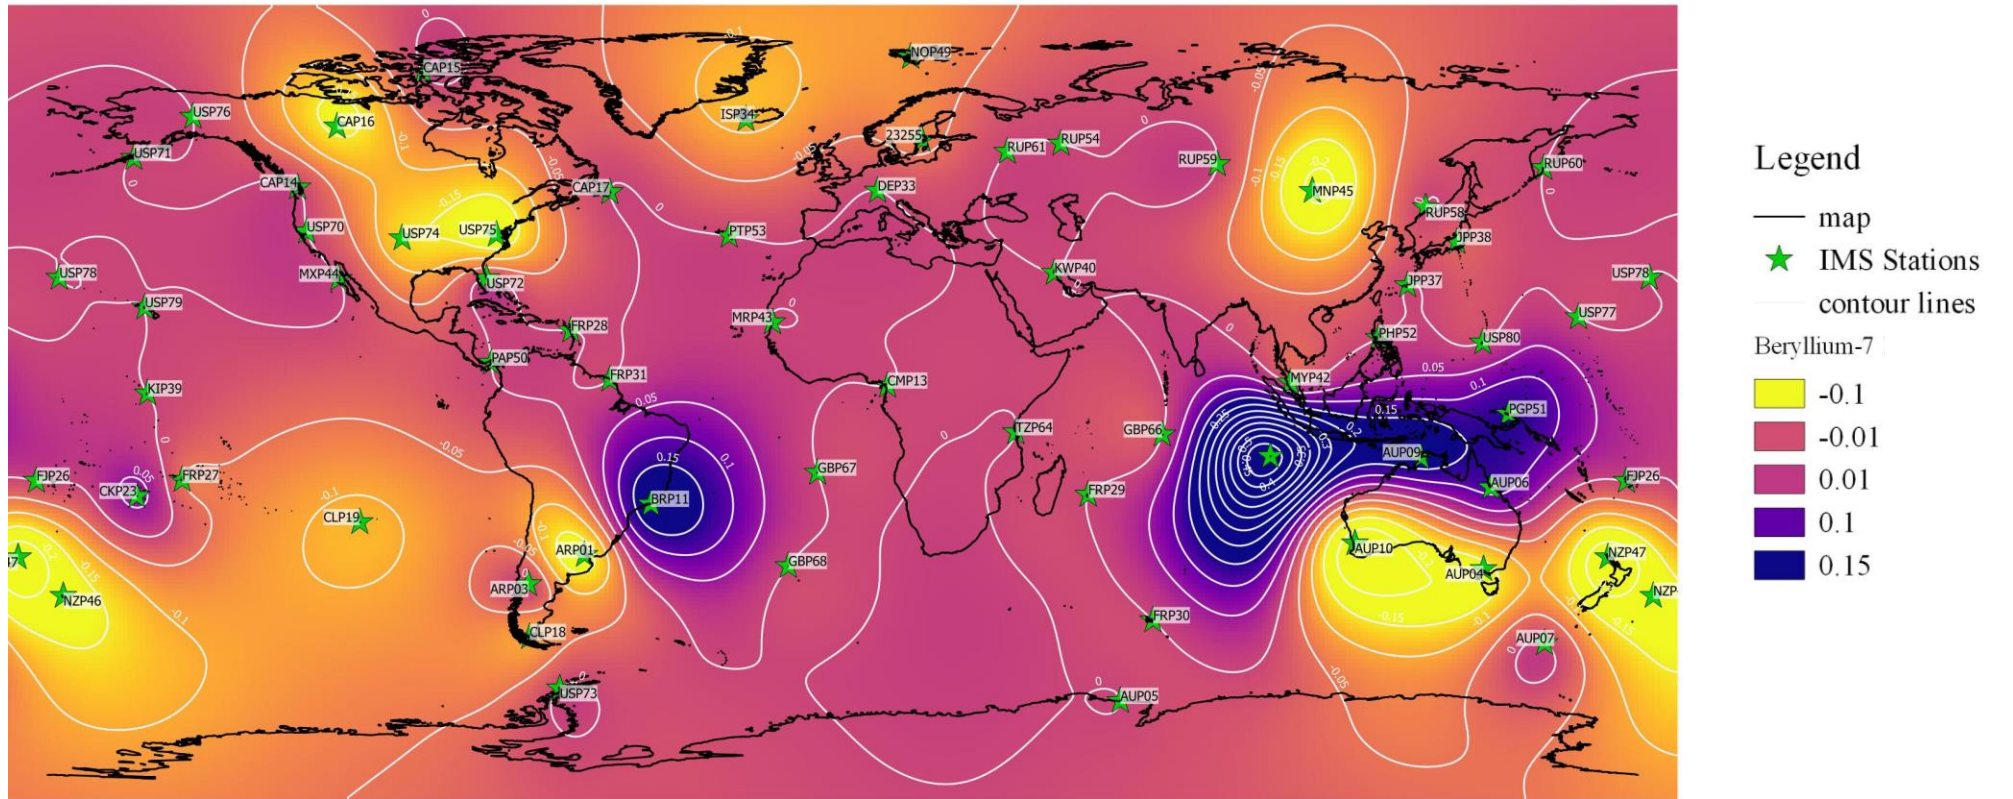

2003

Map executed with QGIS.  
QGIS Development Team (2019). QGIS Geographic  
Information System. Open Source Geospatial Foundation  
Project. <http://qgis.osgeo.org>.

# <sup>7</sup>Be normalized trend interpolated into a global map

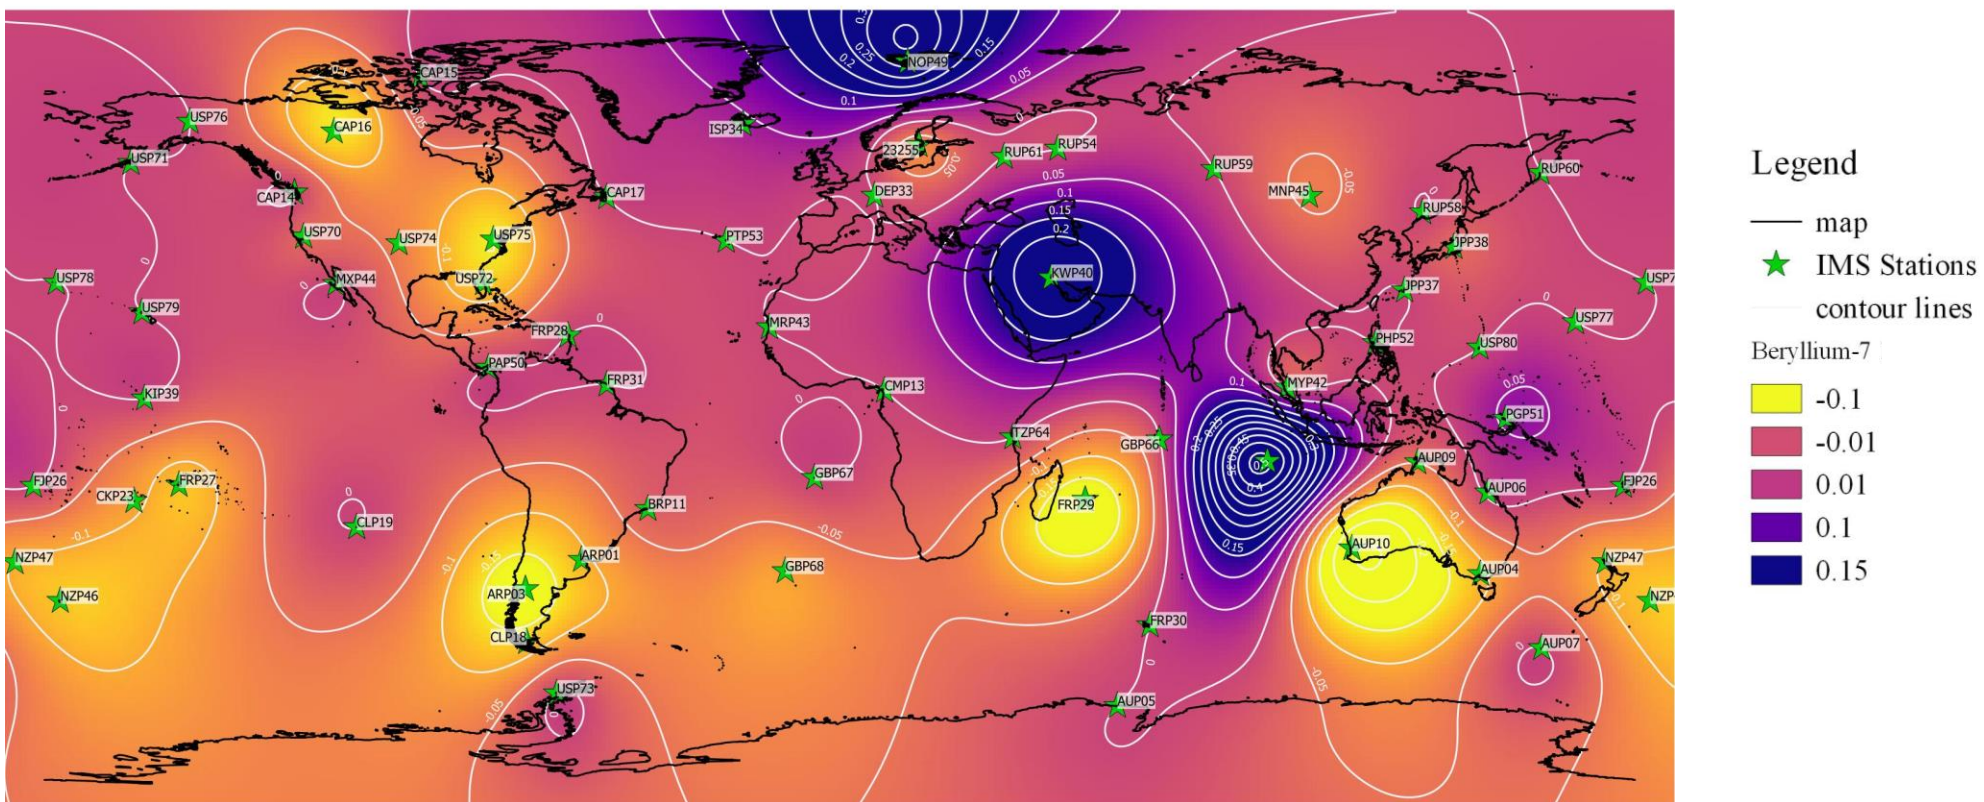

2004

Map executed with QGIS.  
QGIS Development Team (2019). QGIS Geographic Information System. Open Source Geospatial Foundation Project. <http://qgis.osgeo.org>.

# $^7\text{Be}$ normalized trend interpolated into a global map

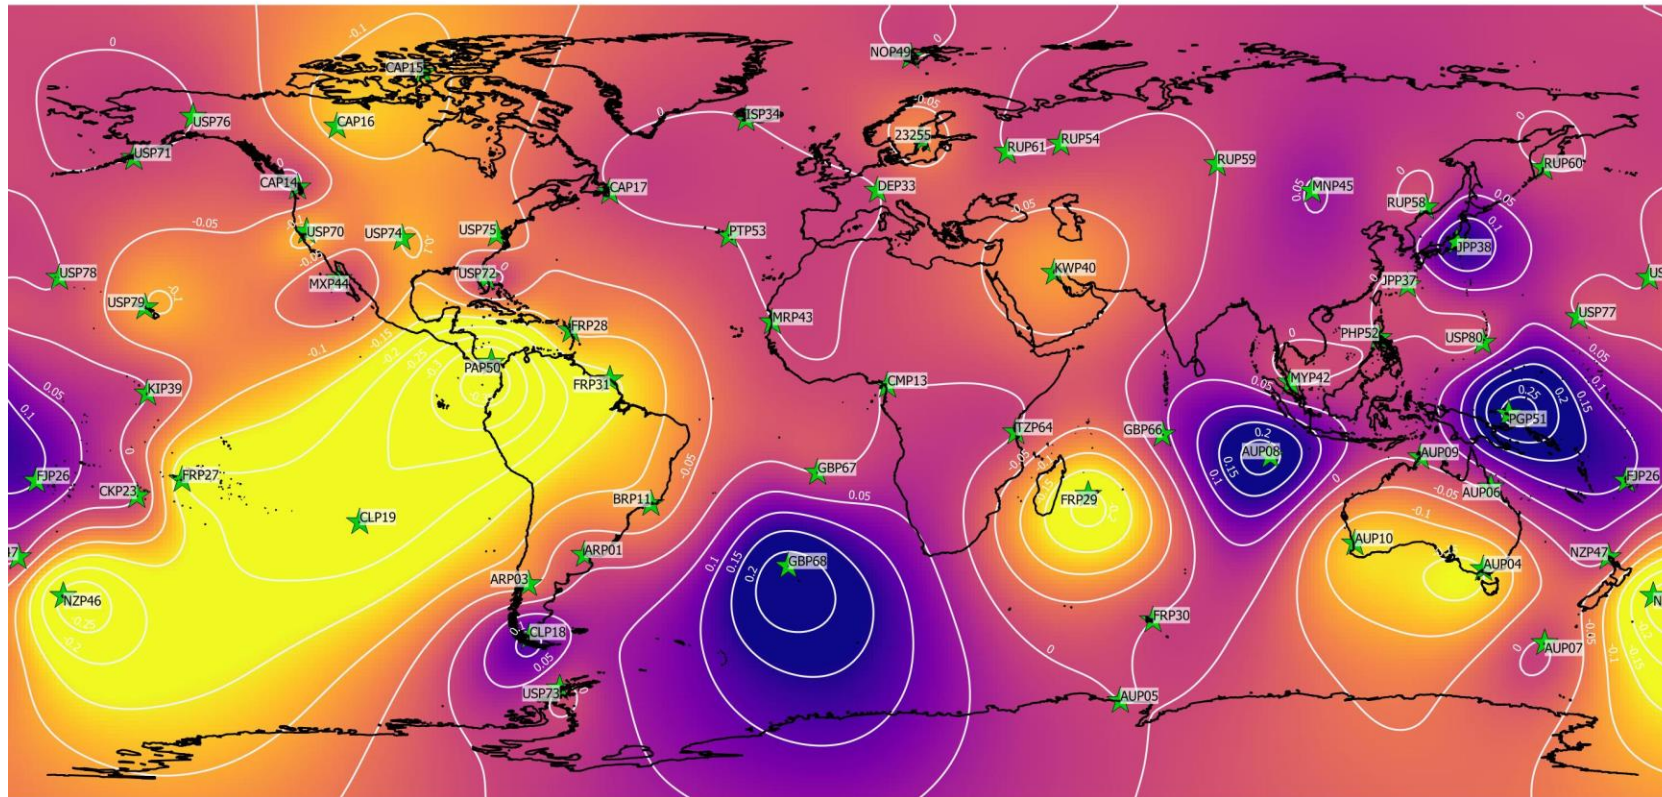

2005

Map executed with QGIS.  
QGIS Development Team (2019). QGIS Geographic  
Information System. Open Source Geospatial Foundation  
Project. <http://qgis.osgeo.org>.

# $^7\text{Be}$ normalized trend interpolated into a global map



2006

Map executed with QGIS.  
QGIS Development Team (2019). QGIS Geographic  
Information System. Open Source Geospatial Foundation  
Project. <http://qgis.osgeo.org>.

# $^7\text{Be}$ normalized trend interpolated into a global map

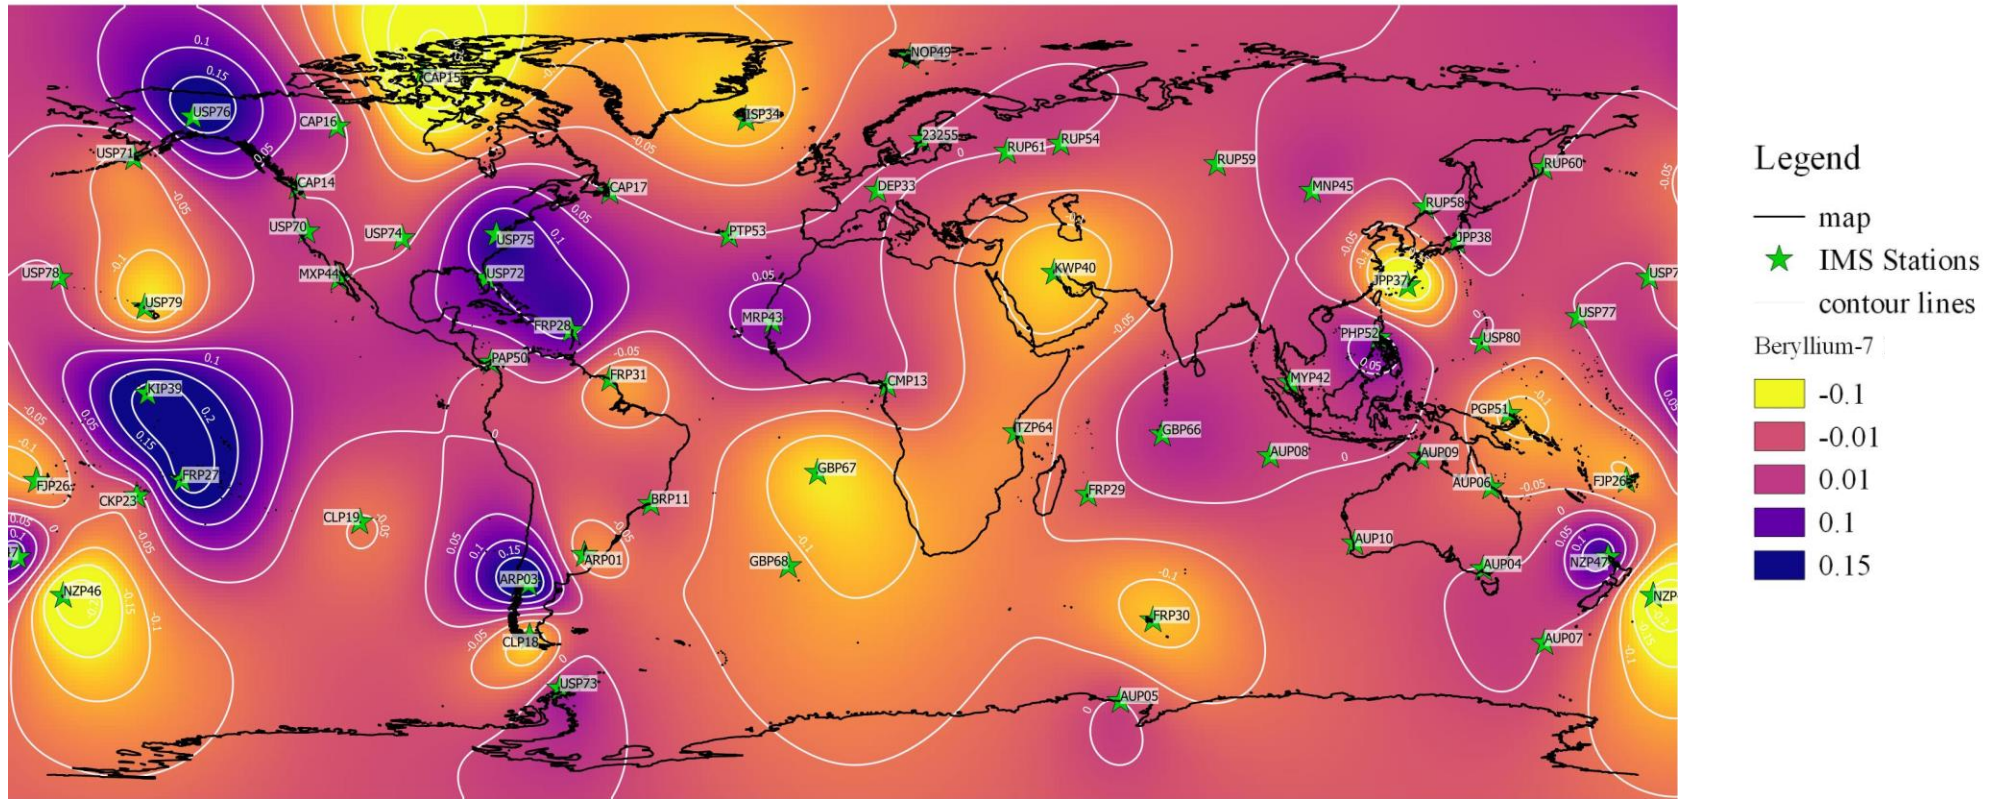

2007

Map executed with QGIS.  
QGIS Development Team (2019). QGIS Geographic  
Information System. Open Source Geospatial Foundation  
Project. <http://qgis.osgeo.org>.

# <sup>7</sup>Be normalized trend interpolated into a global map

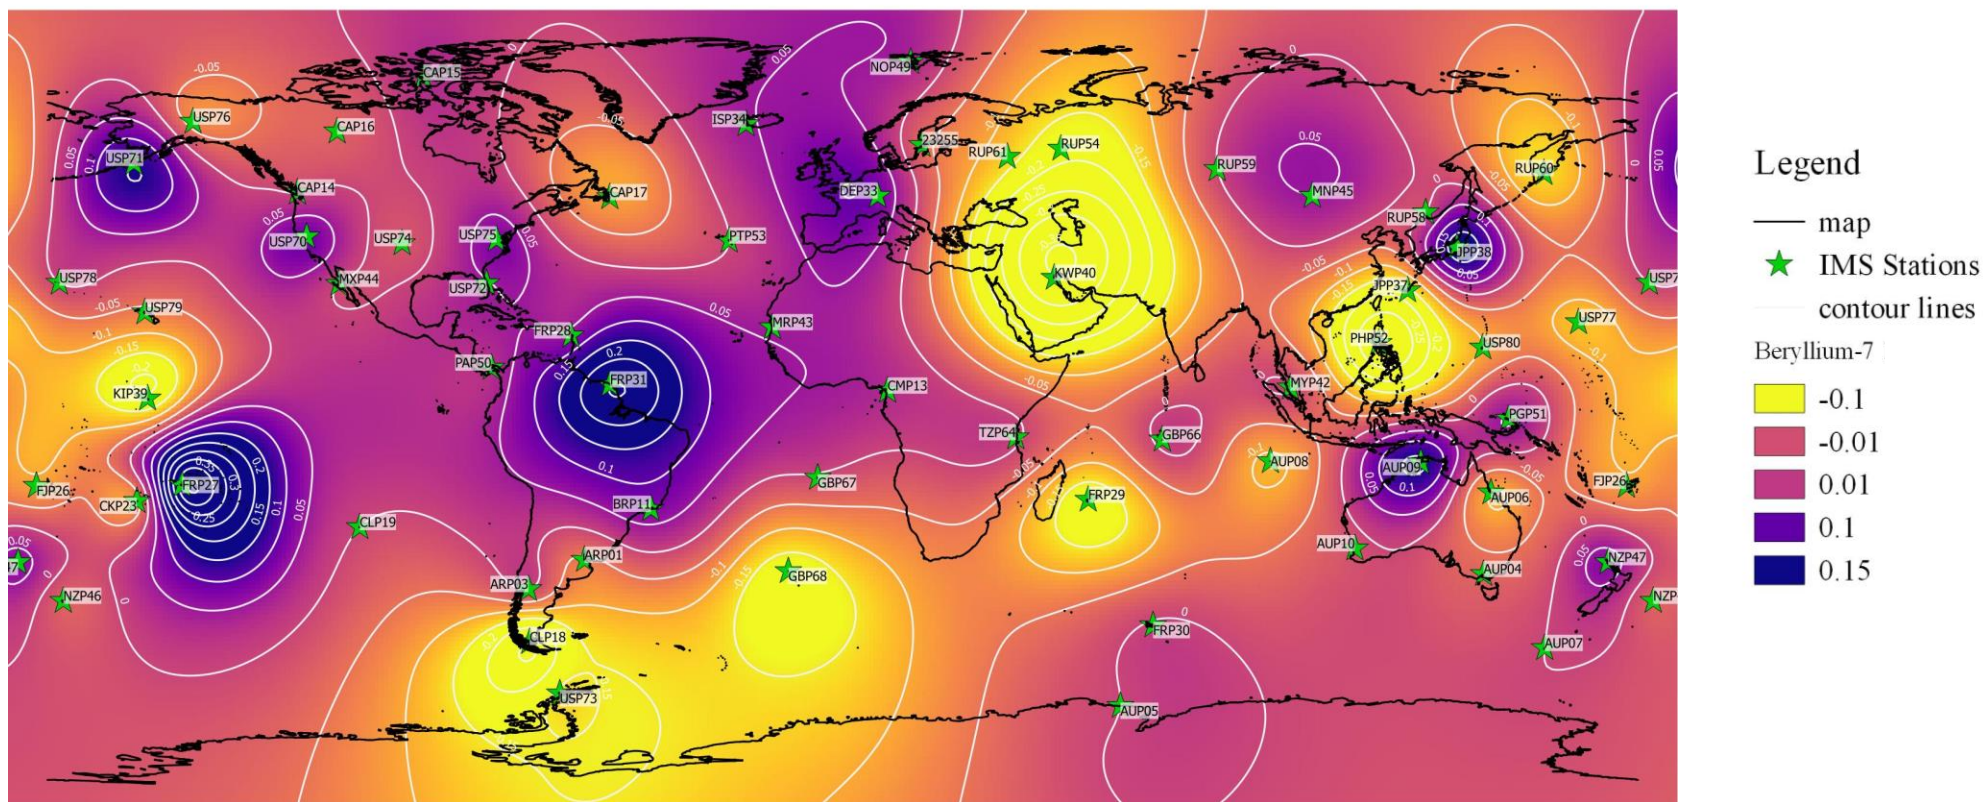

2008

Map executed with QGIS.  
QGIS Development Team (2019). QGIS Geographic  
Information System. Open Source Geospatial Foundation  
Project. <http://qgis.osgeo.org>.



# $^7\text{Be}$ normalized trend interpolated into a global map



2009

Map executed with QGIS.  
QGIS Development Team (2019). QGIS Geographic  
Information System. Open Source Geospatial Foundation  
Project. <http://qgis.osgeo.org>.

# $^7\text{Be}$ normalized trend interpolated into a global map



2010

Map executed with QGIS.  
QGIS Development Team (2019). QGIS Geographic  
Information System. Open Source Geospatial Foundation  
Project. <http://qgis.osgeo.org>.

# <sup>7</sup>Be normalized trend interpolated into a global map



2011

Map executed with QGIS.  
QGIS Development Team (2019). QGIS Geographic  
Information System. Open Source Geospatial Foundation  
Project. <http://qgis.osgeo.org>.

## $^7\text{Be}$ normalized trend interpolated into a global map



2012

Map executed with QGIS.  
QGIS Development Team (2019). QGIS Geographic  
Information System. Open Source Geospatial Foundation  
Project. <http://qgis.osgeo.org>.

# $^7\text{Be}$ normalized trend interpolated into a global map



2013

Map executed with QGIS.  
QGIS Development Team (2019). QGIS Geographic  
Information System. Open Source Geospatial Foundation  
Project. <http://qgis.osgeo.org>.

# $^7\text{Be}$ normalized trend interpolated into a global map

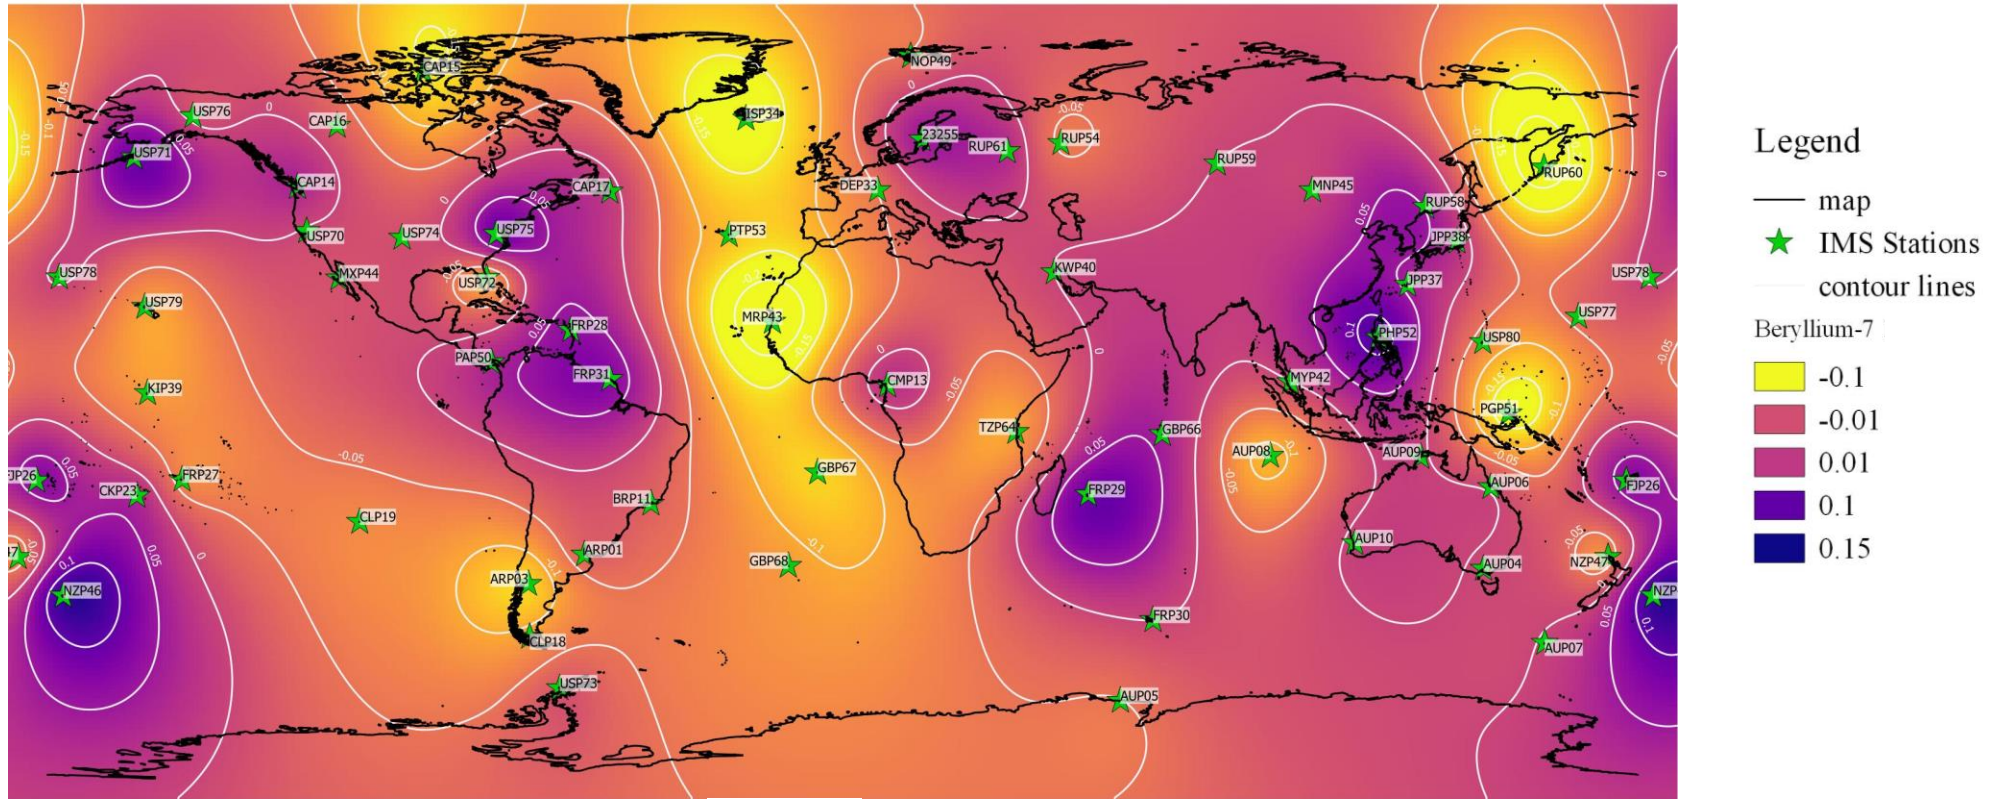

**Legend**

- map
- ★ IMS Stations
- contour lines

Beryllium-7

- 0.1
- 0.01
- 0.01
- 0.1
- 0.15

2014

Map executed with QGIS.  
QGIS Development Team (2019). QGIS Geographic  
Information System. Open Source Geospatial Foundation  
Project. <http://qgis.osgeo.org>.

## $^7\text{Be}$ normalized trend interpolated into a global map



2015

Map executed with QGIS.  
QGIS Development Team (2019). QGIS Geographic  
Information System. Open Source Geospatial Foundation  
Project. <http://qgis.osgeo.org>.

# <sup>7</sup>Be normalized trend interpolated into a global map



2016

Map executed with QGIS.  
QGIS Development Team (2019). QGIS Geographic Information System. Open Source Geospatial Foundation Project. <http://qgis.osgeo.org>.



# $^7\text{Be}$ normalized trend interpolated into a global map



2017

Map executed with QGIS.  
QGIS Development Team (2019). QGIS Geographic  
Information System. Open Source Geospatial Foundation  
Project. <http://qgis.osgeo.org>.

# $^7\text{Be}$ normalized trend interpolated into a global map



2018

Map executed with QGIS.  
QGIS Development Team (2019). QGIS Geographic  
Information System. Open Source Geospatial Foundation  
Project. <http://qgis.osgeo.org>.

### <sup>7</sup>Be normalized trend interpolated into a global map

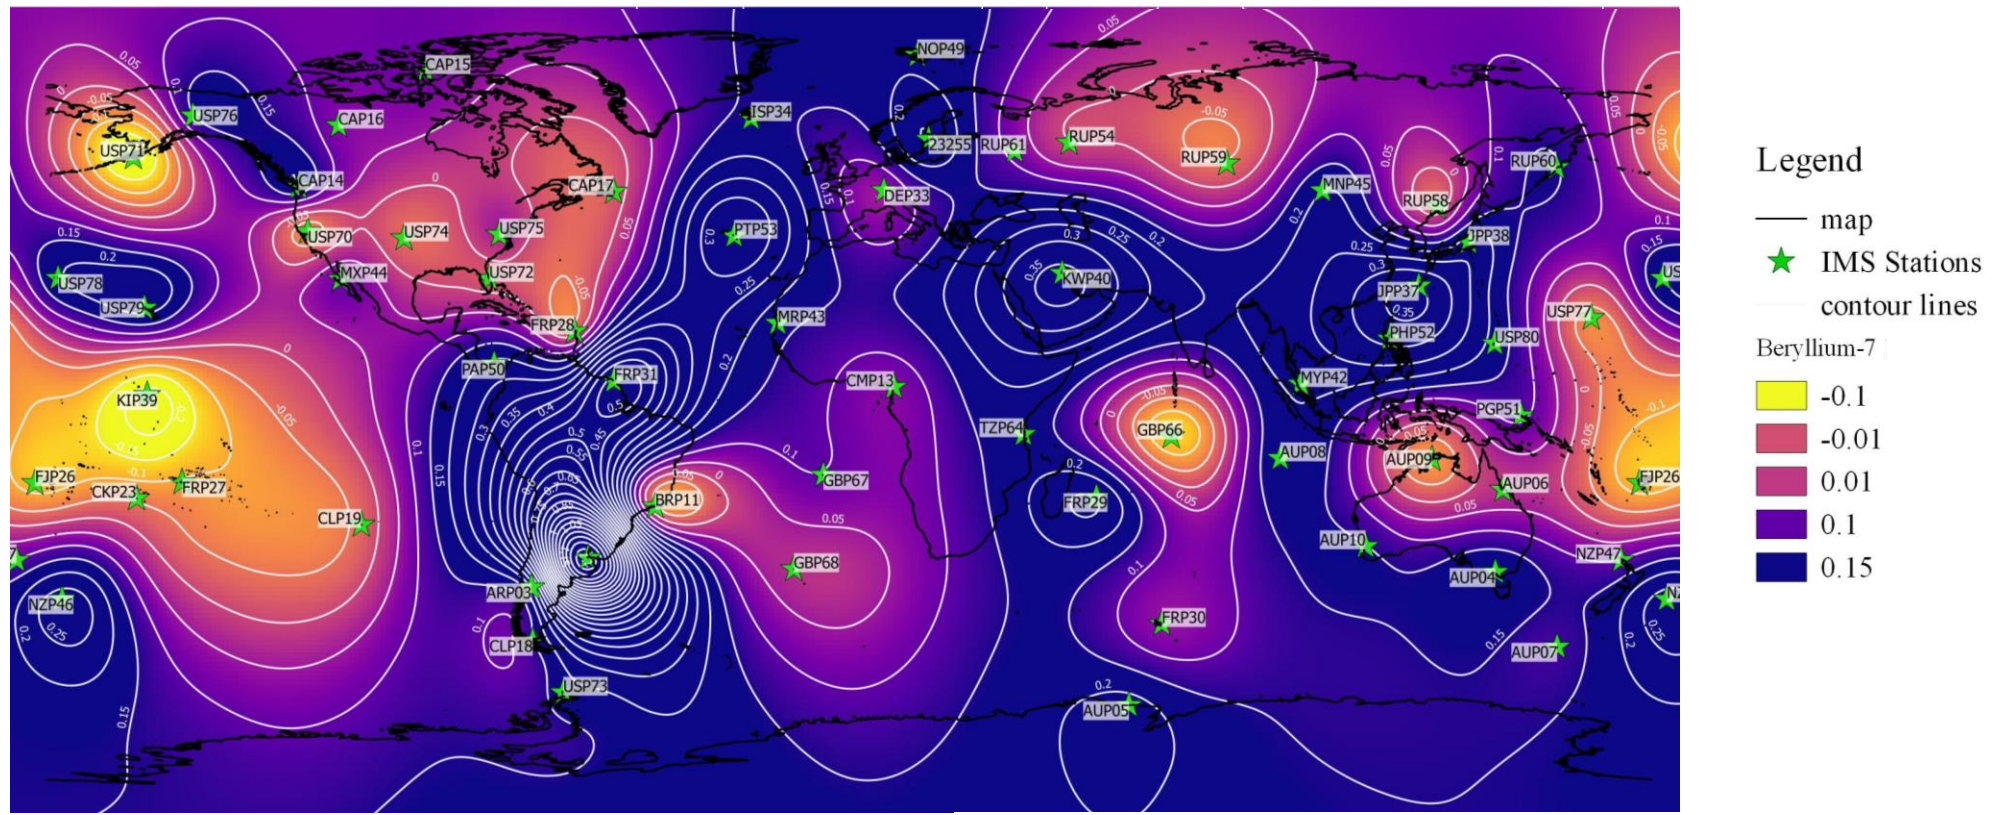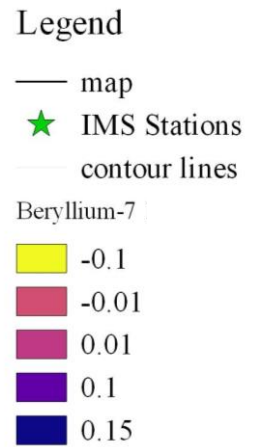

2019

Map executed with QGIS.  
 QGIS Development Team (2019). QGIS Geographic Information System. Open Source Geospatial Foundation Project. <http://qgis.osgeo.org>.

# <sup>7</sup>Be normalized trend interpolated into a global map



2003

Map executed with QGIS.  
QGIS Development Team (2019). QGIS Geographic  
Information System. Open Source Geospatial Foundation  
Project. <http://qgis.osgeo.org>.

# $^7\text{Be}$ normalized trend interpolated into a global map



2004

Map executed with QGIS.  
QGIS Development Team (2019). QGIS Geographic  
Information System. Open Source Geospatial Foundation  
Project. <http://qgis.osgeo.org>.

# $^7\text{Be}$ normalized trend interpolated into a global map



2005

Map executed with QGIS.  
QGIS Development Team (2019). QGIS Geographic  
Information System. Open Source Geospatial Foundation  
Project. <http://qgis.osgeo.org>.

# $^7\text{Be}$ normalized trend interpolated into a global map



2006

Map executed with QGIS.  
QGIS Development Team (2019). QGIS Geographic  
Information System. Open Source Geospatial Foundation  
Project. <http://qgis.osgeo.org>.

# $^7\text{Be}$ normalized trend interpolated into a global map



2007

Map executed with QGIS.  
QGIS Development Team (2019). QGIS Geographic  
Information System. Open Source Geospatial Foundation  
Project. <http://qgis.osgeo.org>.



# <sup>7</sup>Be normalized trend interpolated into a global map

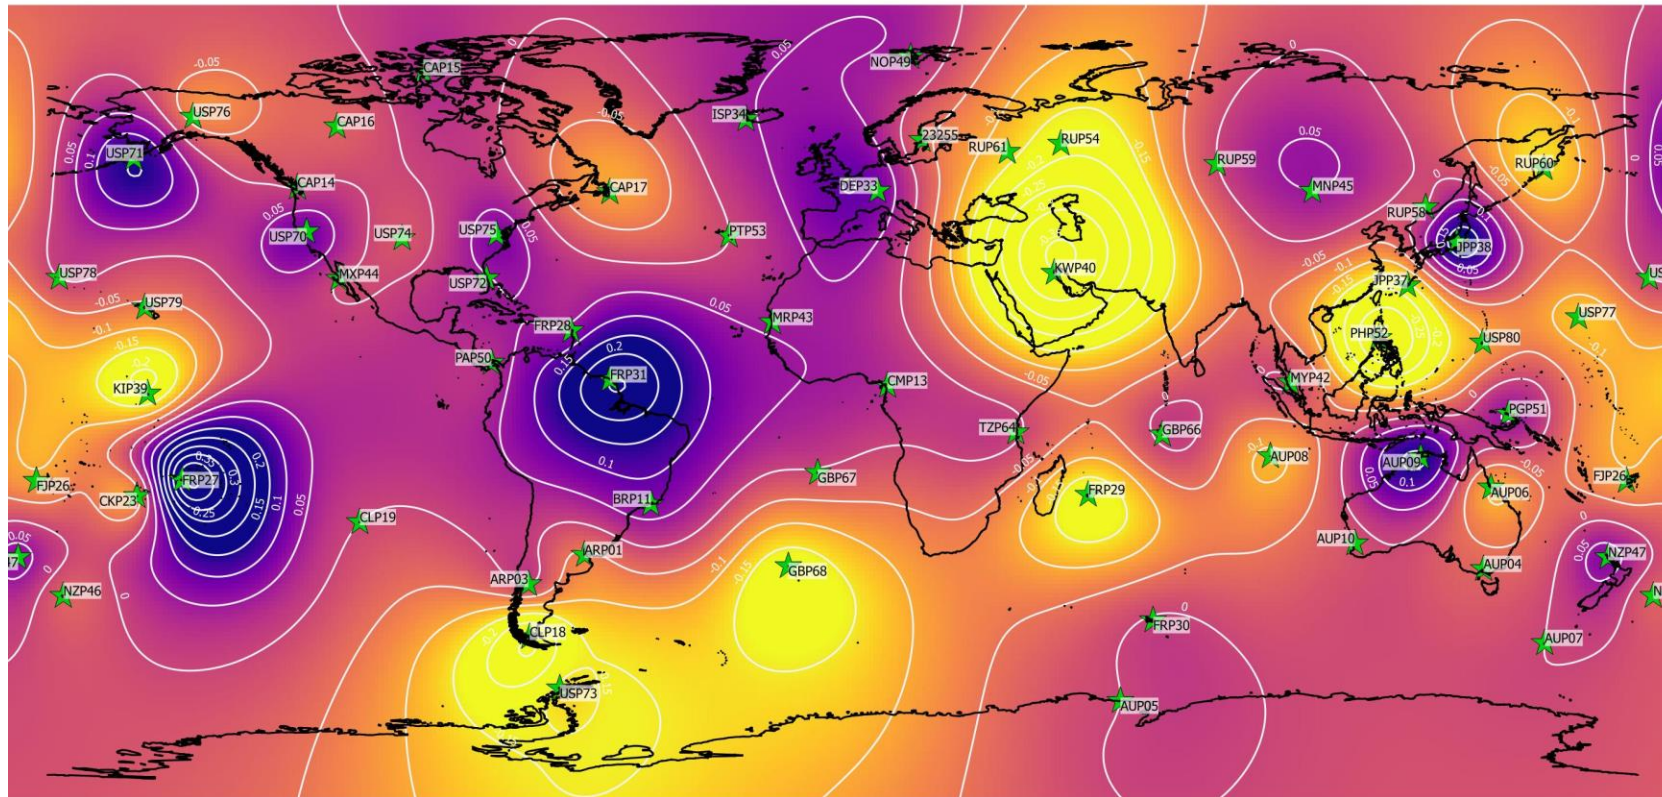

2008

Map executed with QGIS.  
QGIS Development Team (2019). QGIS Geographic Information System. Open Source Geospatial Foundation Project. <http://qgis.osgeo.org>.

# $^7\text{Be}$ normalized trend interpolated into a global map



2009

Map executed with QGIS.  
QGIS Development Team (2019). QGIS Geographic  
Information System. Open Source Geospatial Foundation  
Project. <http://qgis.osgeo.org>.

# $^7\text{Be}$ normalized trend interpolated into a global map



2010

Map executed with QGIS.  
QGIS Development Team (2019). QGIS Geographic  
Information System. Open Source Geospatial Foundation  
Project. <http://qgis.osgeo.org>.

# <sup>7</sup>Be normalized trend interpolated into a global map



2011

Map executed with QGIS.  
QGIS Development Team (2019). QGIS Geographic  
Information System. Open Source Geospatial Foundation  
Project. <http://qgis.osgeo.org>.

## $^7\text{Be}$ normalized trend interpolated into a global map



2012

Map executed with QGIS.  
QGIS Development Team (2019). QGIS Geographic  
Information System. Open Source Geospatial Foundation  
Project. <http://qgis.osgeo.org>.

# $^7\text{Be}$ normalized trend interpolated into a global map



2013

Map executed with QGIS.  
QGIS Development Team (2019). QGIS Geographic  
Information System. Open Source Geospatial Foundation  
Project. <http://qgis.osgeo.org>.

# $^7\text{Be}$ normalized trend interpolated into a global map

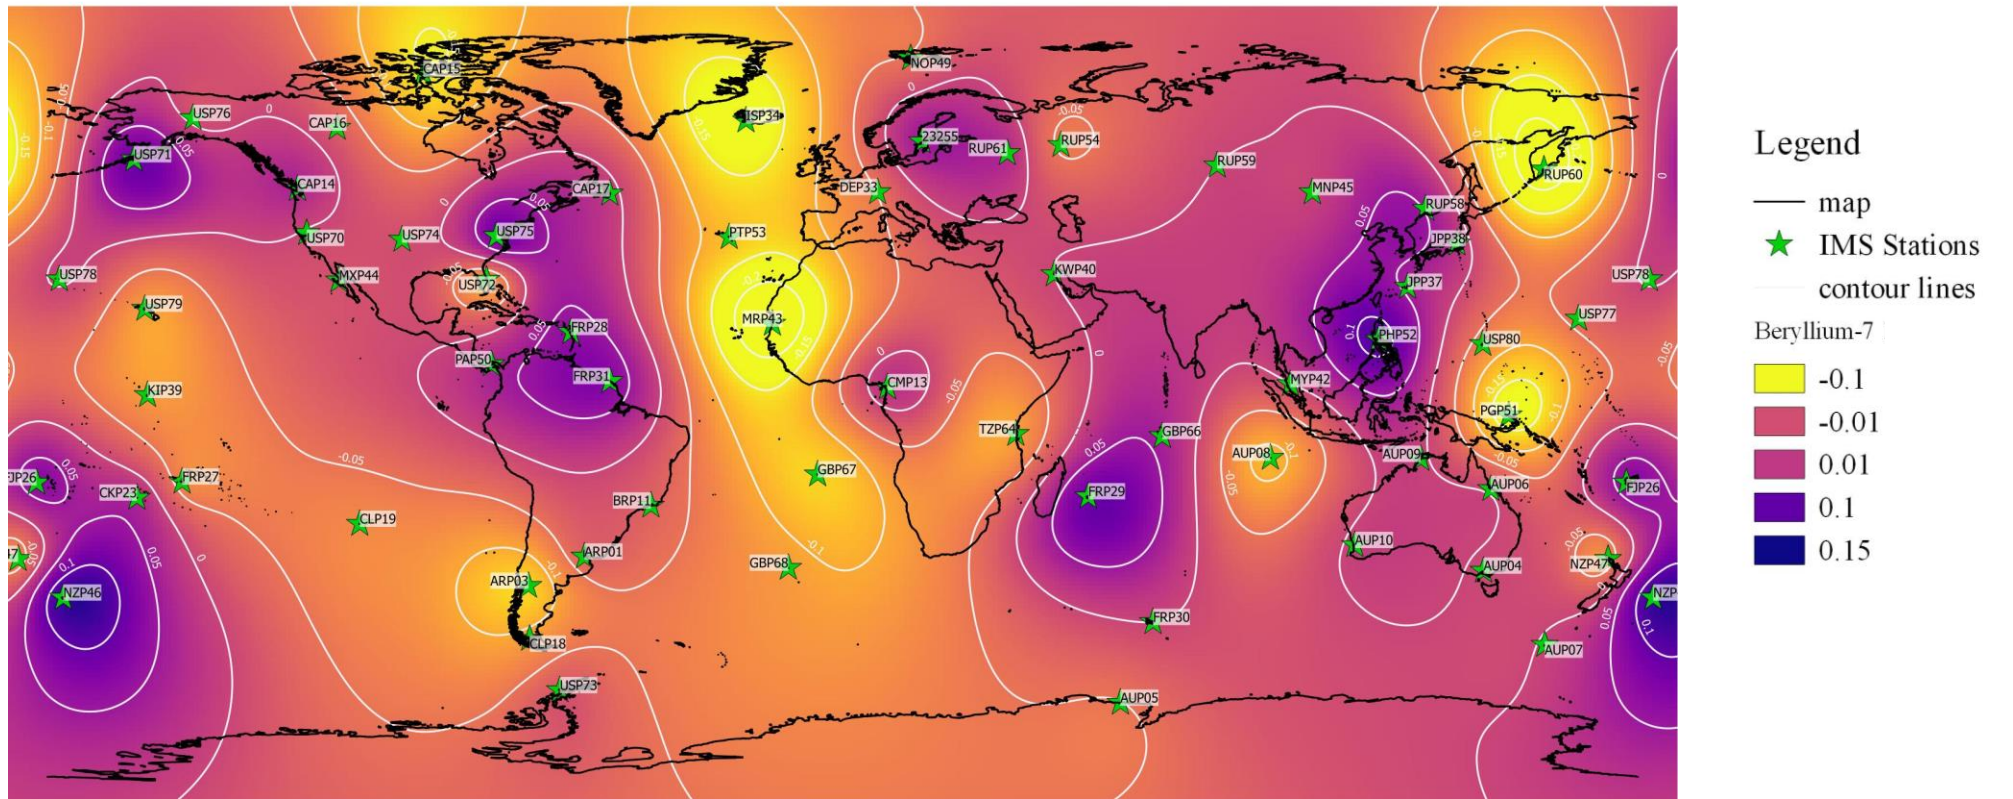

2014

Map executed with QGIS.  
QGIS Development Team (2019). QGIS Geographic  
Information System. Open Source Geospatial Foundation  
Project. <http://qgis.osgeo.org>.

# $^7\text{Be}$ normalized trend interpolated into a global map



2015

Map executed with QGIS.  
QGIS Development Team (2019). QGIS Geographic  
Information System. Open Source Geospatial Foundation  
Project. <http://qgis.osgeo.org>.



## <sup>7</sup>Be normalized trend interpolated into a global map



2016

Map executed with QGIS.  
QGIS Development Team (2019). QGIS Geographic  
Information System. Open Source Geospatial Foundation  
Project. <http://qgis.osgeo.org>.

# $^7\text{Be}$ normalized trend interpolated into a global map



2017

Map executed with QGIS.  
QGIS Development Team (2019). QGIS Geographic  
Information System. Open Source Geospatial Foundation  
Project. <http://qgis.osgeo.org>.

# <sup>7</sup>Be normalized trend interpolated into a global map



2018

Map executed with QGIS.  
QGIS Development Team (2019). QGIS Geographic  
Information System. Open Source Geospatial Foundation  
Project. <http://qgis.osgeo.org>.

# <sup>7</sup>Be normalized trend interpolated into a global map

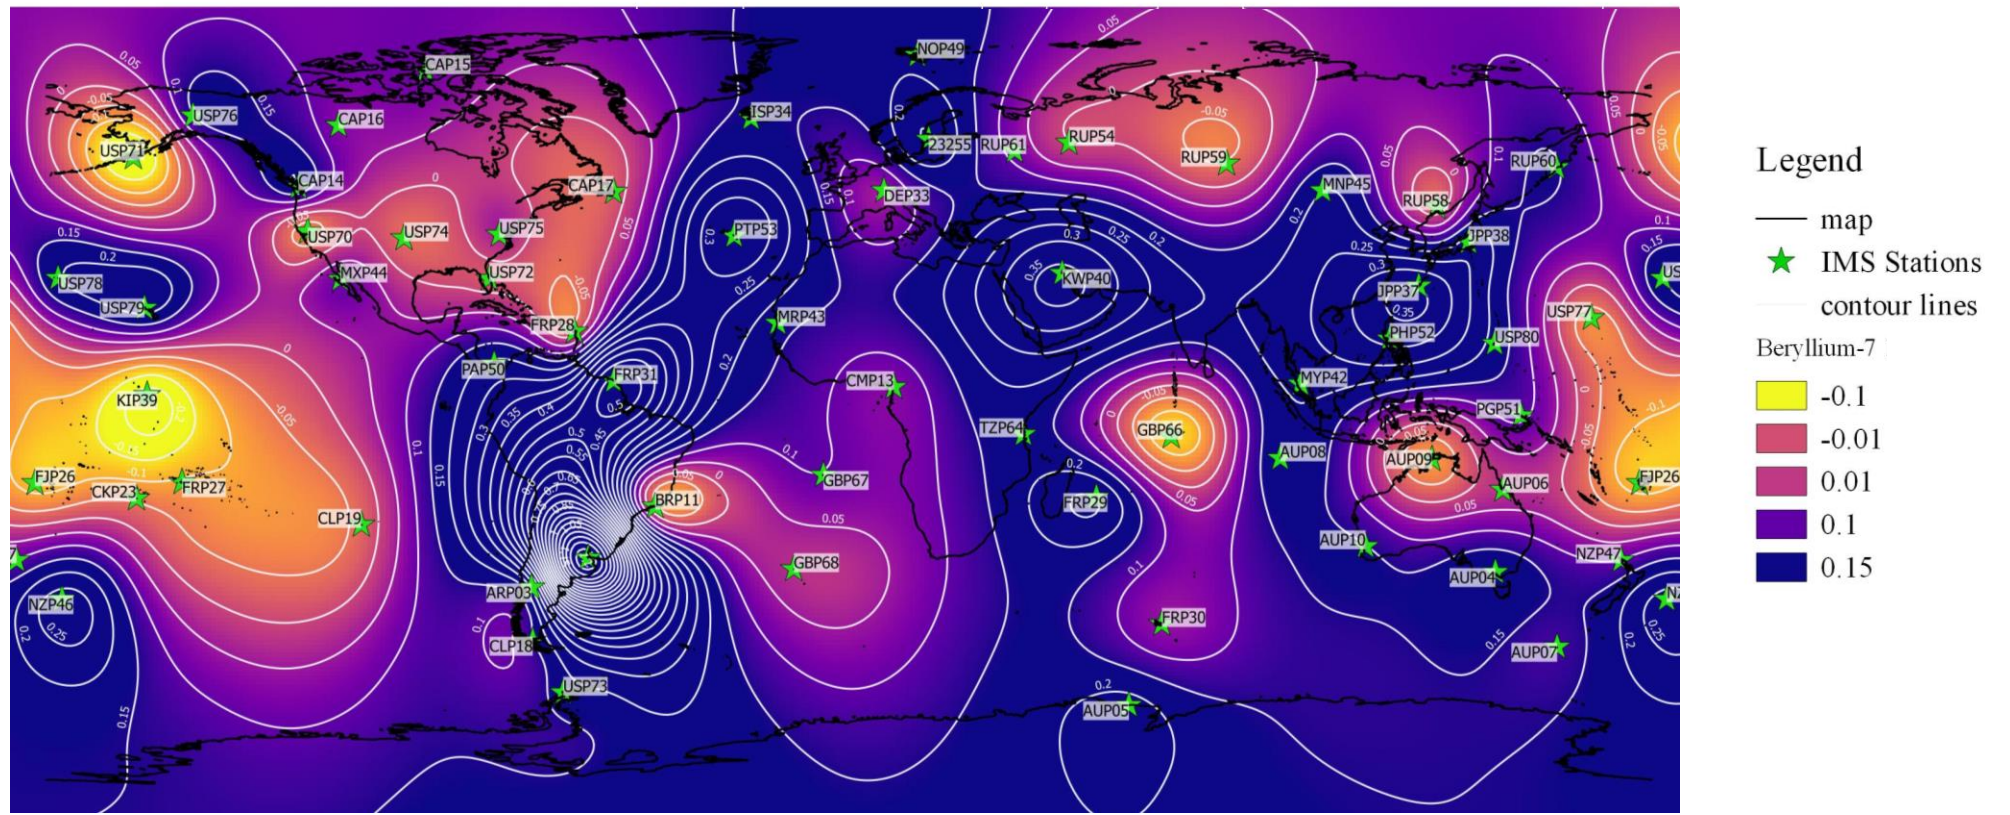

2019

Map executed with QGIS.  
QGIS Development Team (2019). QGIS Geographic Information System. Open Source Geospatial Foundation Project. <http://qgis.osgeo.org>.

# <sup>7</sup>Be normalized trend interpolated into a global map



2003

Map executed with QGIS.  
QGIS Development Team (2019). QGIS Geographic  
Information System. Open Source Geospatial Foundation  
Project. <http://qgis.osgeo.org>.

# $^7\text{Be}$ normalized trend interpolated into a global map



2004

Map executed with QGIS.  
QGIS Development Team (2019). QGIS Geographic  
Information System. Open Source Geospatial Foundation  
Project. <http://qgis.osgeo.org>.

# $^7\text{Be}$ normalized trend interpolated into a global map



2005

Map executed with QGIS.  
QGIS Development Team (2019). QGIS Geographic  
Information System. Open Source Geospatial Foundation  
Project. <http://qgis.osgeo.org>.

# $^7\text{Be}$ normalized trend interpolated into a global map



2006

Map executed with QGIS.  
QGIS Development Team (2019). QGIS Geographic  
Information System. Open Source Geospatial Foundation  
Project. <http://qgis.osgeo.org>.



# $^7\text{Be}$ normalized trend interpolated into a global map



2007

Map executed with QGIS.  
QGIS Development Team (2019). QGIS Geographic  
Information System. Open Source Geospatial Foundation  
Project. <http://qgis.osgeo.org>.

# <sup>7</sup>Be normalized trend interpolated into a global map

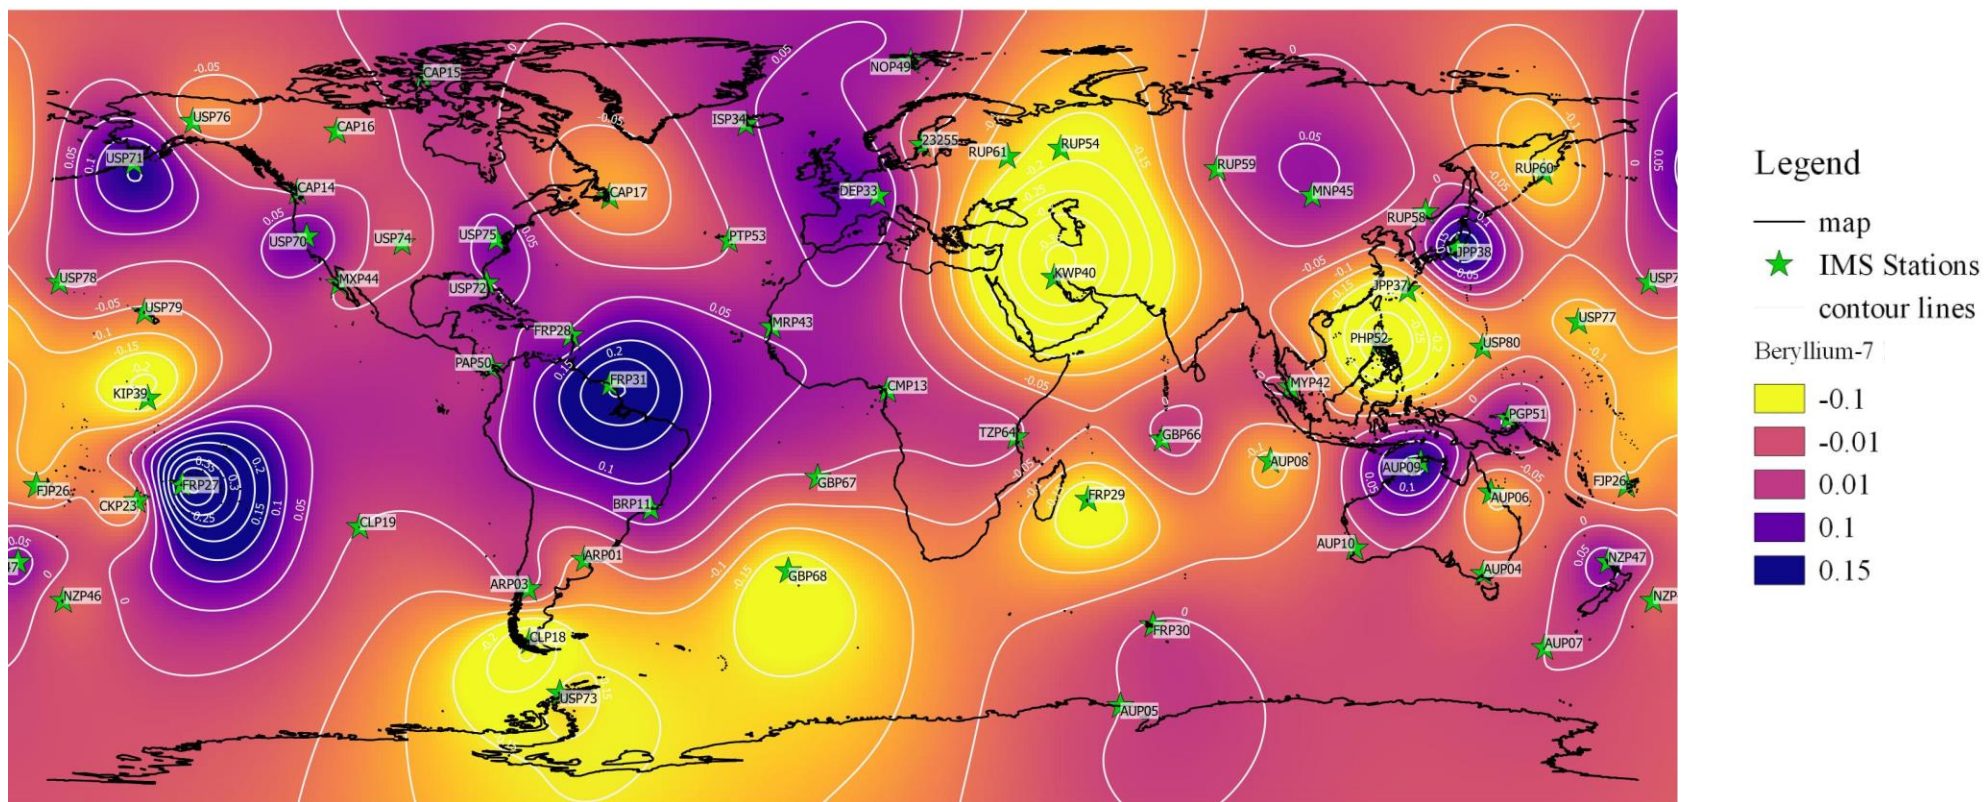

2008

Map executed with QGIS.  
QGIS Development Team (2019). QGIS Geographic  
Information System. Open Source Geospatial Foundation  
Project. <http://qgis.osgeo.org>.

# $^7\text{Be}$ normalized trend interpolated into a global map



2009

Map executed with QGIS.  
QGIS Development Team (2019). QGIS Geographic  
Information System. Open Source Geospatial Foundation  
Project. <http://qgis.osgeo.org>.

# $^7\text{Be}$ normalized trend interpolated into a global map



2010

Map executed with QGIS.  
QGIS Development Team (2019). QGIS Geographic  
Information System. Open Source Geospatial Foundation  
Project. <http://qgis.osgeo.org>.

# <sup>7</sup>Be normalized trend interpolated into a global map



2011

Map executed with QGIS.  
QGIS Development Team (2019). QGIS Geographic  
Information System. Open Source Geospatial Foundation  
Project. <http://qgis.osgeo.org>.

## $^7\text{Be}$ normalized trend interpolated into a global map



2012

Map executed with QGIS.  
QGIS Development Team (2019). QGIS Geographic  
Information System. Open Source Geospatial Foundation  
Project. <http://qgis.osgeo.org>.

# $^7\text{Be}$ normalized trend interpolated into a global map



2013

Map executed with QGIS.  
QGIS Development Team (2019). QGIS Geographic  
Information System. Open Source Geospatial Foundation  
Project. <http://qgis.osgeo.org>.

# $^7\text{Be}$ normalized trend interpolated into a global map



2014

Map executed with QGIS.  
QGIS Development Team (2019). QGIS Geographic  
Information System. Open Source Geospatial Foundation  
Project. <http://qgis.osgeo.org>.



# $^7\text{Be}$ normalized trend interpolated into a global map



2015

Map executed with QGIS.  
QGIS Development Team (2019). QGIS Geographic  
Information System. Open Source Geospatial Foundation  
Project. <http://qgis.osgeo.org>.

## <sup>7</sup>Be normalized trend interpolated into a global map



2016

Map executed with QGIS.  
QGIS Development Team (2019). QGIS Geographic  
Information System. Open Source Geospatial Foundation  
Project. <http://qgis.osgeo.org>.

# $^7\text{Be}$ normalized trend interpolated into a global map



2017

Map executed with QGIS.  
QGIS Development Team (2019). QGIS Geographic  
Information System. Open Source Geospatial Foundation  
Project. <http://qgis.osgeo.org>.

# <sup>7</sup>Be normalized trend interpolated into a global map



2018

Map executed with QGIS.  
QGIS Development Team (2019). QGIS Geographic  
Information System. Open Source Geospatial Foundation  
Project. <http://qgis.osgeo.org>.

# $^7\text{Be}$ normalized trend interpolated into a global map



2019

Map executed with QGIS.  
QGIS Development Team (2019). QGIS Geographic Information System. Open Source Geospatial Foundation Project. <http://qgis.osgeo.org>.
